# Supplementary material for: Highly variable genomic methylation in the Beckwith-Wiedemann syndrome associated with Multi-Locus Imprinting Disturbances
Source: Research Square preprint supplement (doi:10.21203/rs.3.rs-6762380/v1), 2025-06-16
Supplement: Supplementary file 1 [file 813f09f160c0c5e185f8ce26.xlsx]

## Sheet: S1
Table S1: Patients clinical informations
Patient code	Publications	MLID (MS-MLPA test)	MLID (Methylation array)	Maternal-effect gene variant (mother)	Zygotic factor variant (patient)	Miscarriages	Male/Female	Date of birth	Age at sampling	Maternal age at pregnancy	Gestational age	ART	Twinning	Clinical score	Macroglossia	Lateralised overgrowth	Exomphalos	Multifocal and/or bilateral Wilms tumour or nephroblastomatosis	Hyperinsulinism	Adrenal cortex cytomegaly, placental mesenchymal dysplasia or pancreatic adenomatosis	Birthweight >2SDS above the mean	Polyhydramnios and/or placentomegaly	Umbilical hernia	Diastasis recti	Nephromegaly and/or Hepatomegaly	Hypoglycaemia	Ear creases and/or pits	Facial naevus simplex	Typical BWSp tumours (neuroblastoma, rhabdomyosarcoma, unilateral Wilms tumour, hepatoblastoma, adrenocortical carcinoma or phaeochromocytoma)	Facial asymmetry	Facies grossolana	Cleft palate	Cardiomyopathies/cardiac defects	Seizures	Mental delay/Neurodevelopmental delay	Other neoplasms	Others
P1	Sparago et al.2019, Clinical Epigenetics (III-1)	MLID	C3	NLRP5	-	4	M	1999-09-27	18 years	31 years	39w	-		9	P	P					*	P	P			P	P	P							P		*Small for Gestational Age. Cryptorchidism, hypocalcemia, facial dysmorphism, feeding difficulties, apnea, hyperopia
P2 (P1 Brother)	Sparago et al.2019, Clinical Epigenetics (III-2)	MLID	C3		-		M	2008-02-05	10 years	40 years	36w	-		1								P								P							Apnea
P3	Cubellis et al. 2020, Clinical Epigenetics (family 1, III-1)	MLID	C3	PADI6	-	0	F	2015-12-03	4 years	31 years	32w+4d	-		10	P	P				P		P	P	P		P		P					P				Preeclampsia, strabismus, feeding difficulties, macrostomia, apnea, hemangioma
P4 (P3 Sister)	Cubellis et al. 2020, Clinical Epigenetics (family 1, III-2)	MLID	C3		-		F	2018-12-18	1 year	34 years	39w	-		8	P					P		P	P			P		P					P				Hemangioma
P5	Cubellis et al. 2020, Clinical Epigenetics (family 2)	MLID	C3	PADI6	NA	1	F	1987-03-23	30 years	35 years	30w	-		8	P	P							P	P	P		P	P			P						Facial dysmorphism
P6	Cubellis et al. 2020, Clinical Epigenetics (family 3)	MLID	C3	PADI6	NA	0	M	2002-01-30	18 years	-	38w	-		5	P	P					P										P		P	P			Cryptorchidism, mandibular prognathia, Arnold-Chiari I malformation was diagnosed.
P7		MLID	C3	NA	-	0	M	2017-10-14	9 months	37 years	36w	-		5	P							P	P	P			P										Macrostomia, mandibular prognathia
P8	Bliek et al. 2009, EJHG (IC2-BWS2)	MLID	C3	-	-	1 miscarriage + 1 stillborn	M	1996-08-19	4 years	35 years	37w	-		9	P	P								P	P	P	P	P			P						Cryptorchidism, hypothyroidism
P9	Pignata et al.2022, Clinical Epigenetics (BWS2)	MLID	C3	PADI6	NA	2 miscarriages + 1 stillborn	F	1982-10-03	39 years	36 years	33w	-		8	P							P		P	P	P	P	P		P	P				P		Enlarged pancreas, feeding difficulties, hearing impairment, mild arachnodactyly of hands, hypoplasia of the maxilla, ureteric anomalies
P10		MLID	C3	-	-	0	F	1994	16 years	36 years	36w	-		10	P		P				P	P		P	P	P	P				P						Macrostomia,intestinal malrotation, pyloric stenosis surgery, mandibular prognathia
P11		MLID	C3	-	-	0	M	2009-12-15	2 months	32 years	36w + 2d	-		7	P		P				P	P						P			P						Feeding difficulties, macrostomia, mandibular prognathia, hypoplasia of the maxilla, prominent occiput
P12	Bliek et al. 2009, EJHG (IC2-BWS3); Pignata et al.2022, Clinical Epigenetics (BWS1)	MLID	C3	KHDC3L	NA	0	F	1997-11-20	24 years	25 years	36w	-		8	P						P		P		P	P	P	P			P			P	P		Feeding difficulties, mandibular prognathia, hypoplasia of the maxilla, hearing impairment, myopia, preeclampsia, strabismus
P13	Bliek et al. 2009, EJHG(IC2-BWS1)	MLID	C3	NA	-	0	M	2005-01-02	2 months	-	40w	P	P	4	P								P	P				P			P						*ovarian hyperstimulation. Skin marbling, macrostomia, hypoplasia of the maxilla, prominent occiput, proptosis, apnea (perinatal), inguinal hernia
P14	Pignata et al.2022, Clinical Epigenetics (BWS3)	MLID	C3	NLRP5, NLRP4	NA	4 miscarriages + 2 stillborns	F	1981-04-10	30 years	25 years	-	P		5	P	P					P														P		*Ovarian hyperstimulation; Hypoplasia of the maxilla, infantile muscular hypotonia, scoliosis, strabismus, some episodes of cyanosis
P15	Bliek et al. 2009, EJHG (IC2-BWS4)	MLID	C3	-	-	0	M	2003-11-17	5 months	-	-	-		3	P						P
P16		MLID	C3	-	NA	1	F	2000-10-01	5 years	33 years	37w + 3d	-		7	P	P							P				P	P									Prominent occiput
P17	Pignata et al.2022, Clinical Epigenetics (family 4)	MLID	C3	NLRP5	NA	0	M	2004-02-25	15 years		-	P		6	P	P					P					P											Atopic eczema, gestational diabetes
P18	Pignata et al.2022, Clinical Epigenetics (family 6)	MLID	C3	NLRP2	-	0	F	2008-10-26	14 years	37 years	-	-		7	P		P				P					P	P										Nevus flammeus (neck), round face, haemangioma
P19		non-MLID	C2	-	NA	2	M	2005-10-05	4 years	33 years	-	-	P	6		P					P		P	P		P		P		P					P		Large forehead and broad facial features
P20		non-MLID	C2	-	NA	0	F	2006-06-22	1 year	29 years	-	-	P	4	P	P
P21	Pignata et al.2022, Clinical Epigenetics (family 5)	MLID	C3	NLRP2	NA	1	F		22 years		-	-		6	P				P						P	P											Hypoplasia of the maxilla, nevus flammeus (head, neck), neonatal anaemia, respiratory distress, round face
P22		non-MLID	C2	-	NA	0	M	2006-04-16	1 year	30 years	-	P		6	P		P					P			P								P				Ventricular hypertrophy, hypospadias, patent ductus arteriosus
P23		non-MLID	C3	-	NA	0	F	2006-11-27	1 year	32 years	-	-		5	P								P	P		P		P
P24		non-MLID	C2	NA	NA	0	M	2002-05-21	4 months	42 years	-	P		5	P											P	P	P		P					P
P25		MLID	C3	NA	NA	0	M	2008-10-27	1 year	39 years	-	P
P26		MLID	C3	NA	NA	NA	F	1999	6 years	26 years	-	P	P	5	P		P				P																Triplets
P27		non-MLID	C2	NA	NA	0	F	2020-06-23	6 months	29 years	28w + 6d	-	P	8	P						P		P			P	P	P	P								Feeding difficulties,macrostomia, camptodactyly, hemangioma
P28		non-MLID	C2		NA		F	2020-06-23	6 months	29 years	28w + 6d	-	P	1														P									Camptodactyly, hemangioma
P29	Cecere et al. 2023, Cancers	non-MLID	C2	NA	-	0	F	1993-03-26	15 years	24 years	-	-		3		P											P									P	Colorectal cancer
P30		MLID	C3	-	-	0	M	2006-01-30	4 months	-	-	-		5	P							P			P		P										Mandibular prognathia, prominent occiput
P31		MLID	C3	-	-	0	M	1994-09-14	-	-	37w	-		8	P						P		P		P	P	P	P			P		P	P	P		Corpus callosum agenesis, pre-eclampsia, facial dysmorphism, neonatal respiratory distress, hyperbilirubinemia, early bone age
P32		non-MLID	C2	-	NA	0	M	2009-10-23	1 month	27 years	-	-		8	P	P	P						P	P		P					P						Macrostomia, hemangioma, bilateral renal pelvis dilatation
P33		non-MLID	C2	-	NA	1	M	1997-06-03	3 years	32 years	40w	-		7	P	P										P	P	P			P				P		Hemangioma
P34		non-MLID	C2	-	NA	0	M	2001-09-25	2 years	33 years	37w	-	P	6	P		P						P			P				P	P		P				Inguinal hernia
P35		non-MLID	C2	-	NA	2	F	1992-10-13	-	-	41w	-		3	P													P									Type I diabetes
P36		non-MLID	C2	-	NA	0	M	1990-07-18	-	-	38w	-		11	P	P	P				P	P			P	P	P			P	P						Cryptorchidism
P37		non-MLID	C2	-	NA	0	F	2005-08-21	3 months	40 years	36w	-		7	P							P	P	P		P	P	P					P				Apnea, cyanosis, macrostomia, hypoplasia of the maxilla, prominent occiput, batrachian abdomen, mottled skin
P38		non-MLID	C2	-	NA	0	M	2007-11-07	-	23 years	-	-		8	P		P					P			P	P	P					P	P				Hypoplasia of the maxilla, prominent occiput
P39		non-MLID	C2	-	NA	1 miscarriage + 1 stillborn	F	2004-03-02	1 year	21 years	38w	-		7	P		P				P						P	P			P		P
P40		non-MLID	C2	-	NA	0	F	2004-07-16	1 year	-	-	-		6	P						P		P	P			P	P		P							Macrostomia, hypoplasia of the maxilla, hemangioma
P41		non-MLID	C2	NA	NA	0	F	2005-07-21	-	37 years	37w + 6d	-		5	P								P	P			P	P					P				Macrostomia, hypoplasia of the maxilla, prominent occiput
P42		non-MLID	C2	NA	NA	0	F	2006-05-11	-	-	39w	-		6	P						P		P	P			P	P									Prominent occiput
P43		non-MLID	C2	NA	NA	0	M	2007-08-21	-	36 years	38w	-		6	P						P	P	P				P				P						Macrostomia, angiomas, hypoplasia of the maxilla, prominent occiput
P44		non-MLID	C2	NA	NA	0	M	2005-08-09	10 months	34 years	36w	-		8	P	P					P				P	P	P										Macrostomia
P45		non-MLID	C2	NA	NA	0	F	1982-08-03	36 years	35 years	-	-		6	P	P									P		P							P			Cyanosis, macrostomia, genital anomalies
P46		non-MLID	C2	NA	NA	0	F	2000-10-18	3 months	-	37w	-		4	P						P		P
P47		non-MLID	C2	NA	NA	0	F	2000-06-02	8 months	-	-	-		7	P		P					P				P	P				P		P
P48		non-MLID	C2	NA	NA	0	M	1999-10-20	20 years	-	40w	-		7	P	P							P	P	P			P									Neonatal jaundice, hypotonia
P49		non-MLID	C2	NA	NA	0	F	2006-07-03	13 years	32 years	38w	-		7	P	P						P			P			P									Hemangioma
P50		non-MLID	C2	NA	NA	NA	M	NA	NA	NA	-	-		NA
P51		non-MLID	C2	NA	NA	0	F	1992-10-26	11 years	24 years	40w	-		6	P	P							P					P
P52		MLID	C3	PADI6	NA	0	F	2003-06-26	8 months	-	36w	-		9	P	P	P								P		P	P			P
P53	Bliek et al. 2009, EJHG (IC2-BWS5)	MLID	C3	NA	NA	0	F	2002-09-13	9 months	-	-	-		6	P									P	P	P	P			P	P
P54		non-MLID	C2	-	NA	0	F	1988-04-17	-	-	36w	-		11	P	P	P						P		P	P	P	P			P	P			P		Consanguinity, joint hypermobility, hypocalcemia, ureteric anomalies
P55		non-MLID	C2	-	NA	0	F	05/07/1974	30 years	-	-	-		3			P				P
P56		non-MLID	C3	-	NA	0	M	1999-09-19	6 months	41 years	35w + 2d	-		6	P	P											P	P			P		P				Hemangioma, neonatal hypotonia
P57		non-MLID	C2	NA	NA	0	F	2008-03-14	19 months	28 years	38w	P		6	P	P									P		P				P						Mandibular prognathia, macrostomia
P58		non-MLID	C3	NA	NA	0	M	2005-06-07	10 months	34 years	-	-		8	P	P	P										P	P				P	P				Apnea, macrostomia,cryptorchidism, hypospadias, hypoplasia of the maxilla, prominent occiput
P59		non-MLID	C2	NA	NA	0	F	-	-	-	-	-		7	P		P							P		P	P										Intestinal malrotation, feeding difficulties, apnea
P60		non-MLID	C3	-	NA	0	M	1997-12-05	-	-	39w	-		11	P	P	P						P	P	P	P	P	P			P		P	P	P		Hemangioma
P61		non-MLID	C2	NA	NA	0	M	2005-09-23	-	33 years	-	-		6	P		P							P		P											Cryptorchidism
P62		non-MLID	C2	NA	NA	0	F	2004-11-26	-	31 years	33w + 1d	-		8	P	P						P		P			P	P				P	P				Macrostomia, mandibular prognathia, feedng difficulties, hypoplasia of he maxilla, prominent occiput
P63		non-MLID	C2	NA	NA	0	F	1995-08-05	12 years	-	37w	-		8	P	P	P							P			P										Macrostomia, genital anomalies
P64		non-MLID	C2	NA	NA	0	F	2018-07-27	2 months	30 years	40w + 2d	-		3	P													P									Prominent occiput, genital anomalies

## Sheet: S2
Table S2. BWS and Control samples
Sample_Name	Gender	Tissue	Sample_Group	Batch	Age_range	Age
C1	M	Blood	Control	A	B	17
C2	M	Blood	Control	A	B	16
C3	F	Blood	Control	A	D	32
C4	F	Blood	Control	A	C	25
C5	M	Blood	Control	A	B	15
C6	F	Blood	Control	A	B	15
C7	F	Blood	Control	B	D	40
C8	F	Blood	Control	B	C	30
C9	F	Blood	Control	B	A	5
C10	M	Blood	Control	B	A	5
C11	F	Blood	Control	B	A	5
C12	M	Blood	Control	B	A	5
C13	F	Blood	Control	C	A	5
C14	M	Blood	Control	C	A	5
C15 (C10 technical rep)	M	Blood	Control	C	A	5
C16 (C11 technical rep)	F	Blood	Control	C	A	5
C17	M	Blood	Control	D	A	2
C18	M	Blood	Control	D	A	2
C19	F	Blood	Control	D	A	10
C20	F	Blood	Control	D	B	13
C21	F	Blood	Control	D	B	14
C22	M	Blood	Control	D	B	13
C23	F	Blood	Control	D	D	32
C24	F	Blood	Control	D	A	2
C25	M	Blood	Control	E	B	18
C26	F	Blood	Control	E	B	15
C27	M	Blood	Control	E	A	8
C28	M	Blood	Control	E	A	2
C29	Unknown	Blood	Control	F	Unknown	Unknown
C30 (C14 technical rep)	M	Blood	Control	F	A	5
C31	Unknown	Blood	Control	F	Unknown	Unknown
C32	Unknown	Blood	Control	F	Unknown	Unknown
C33	Unknown	Blood	Control	F	Unknown	Unknown
C34	Unknown	Blood	Control	F	Unknown	Unknown
C35	Unknown	Blood	Control	F	Unknown	Unknown
C36	M	Blood	Control	G	Unknown	Unknown
C37	Unknown	Blood	Control	G	Unknown	Unknown
C38	M	Blood	Control	G	Unknown	Unknown
C39	F	Blood	Control	G	Unknown	Unknown
C40	Unknown	Blood	Control	G	Unknown	Unknown
P1	M	Blood	Case	A	B	20
P2 (P1 Brother)	M	Blood	Case	A	B	11
P3	F	Blood	Case	B	A	4
P4 (P3 Sister)	F	Blood	Case	B	A	1
P5	F	Blood	Case	B	B	14
P6	M	Blood	Case	B	B	16
P7	M	Blood	Case	C	A	1
P8	M	Blood	Case	C	A	4
P9	F	Blood	Case	C	B	18
P10	F	Blood	Case	C	B	16
P11	M	Blood	Case	C	A	1
P12	F	Blood	Case	C	A	6
P13	M	Blood	Case	C	A	1
P14	F	Blood	Case	C	C	30
P15	M	Blood	Case	C	A	1
P16	F	Blood	Case	C	A	4
P17	M	Blood	Case	D	B	15
P18	F	Blood	Case	D	B	13
P19	Unknown	Blood	Case	D	Unknown	1
P20	Unknown	Blood	Case	D	Unknown	5
P21	F	Blood	Case	D	B	19
P22	Unknown	Blood	Case	D	Unknown	5
P23	Unknown	Blood	Case	D	Unknown	5
P24	Unknown	Blood	Case	D	Unknown	5
P25	Unknown	Blood	Case	D	Unknown	5
P26	Unknown	Blood	Case	D	Unknown	5
P27	F	Blood	Case	D	A	1
P28	F	Blood	Case	D	A	1
P29	F	Blood	Case	D	C	27
P30	M	Blood	Case	D	A	1
P31	M	Blood	Case	D	A	5
P32	M	Blood	Case	E	A	1
P33	M	Blood	Case	E	A	3
P34	M	Blood	Case	E	A	2
P35	F	Blood	Case	E	A	10
P36	M	Blood	Case	E	A	9
P37	F	Blood	Case	E	A	1
P38	M	Blood	Case	F	A	1
P39	F	Blood	Case	F	A	1
P40	F	Blood	Case	F	A	0.3
P41	F	Blood	Case	F	A	0.25
P42	F	Blood	Case	F	A	0.08
P43	M	Blood	Case	F	A	0.3
P44	M	Blood	Case	F	A	1
P45	F	Blood	Case	F	A	33
P46	F	Blood	Case	F	A	0.25
P47	F	Blood	Case	F	A	0.6
P48	M	Blood	Case	F	A	20
P49	F	Blood	Case	F	A	13
P50	M	Blood	Case	F	Unknown	Unknown
P51	F	Blood	Case	F	A	11
P52	F	Blood	Case	F	A	1
P53	F	Blood	Case	G	A	0.75
P54	F	Blood	Case	G	Unknown	Unknown
P55	F	Blood	Case	G	C	30
P56	M	Blood	Case	G	A	0.5
P57	F	Blood	Case	G	A	1.58
P58	M	Blood	Case	G	A	0.8
P59	F	Blood	Case	G	Unknown	Unknown
P60	M	Blood	Case	G	Unknown	Unknown
P61	M	Blood	Case	G	Unknown	Unknown
P62	F	Blood	Case	G	Unknown	Unknown
P63	F	Blood	Case	G	A	12
P64	F	Blood	Case	G	A	0.16

## Sheet: S3
Table S3. iDMR coordinates and entropy
iDMR	Shannon	chrom	start	end	germ	NarrayProbes	covered
FANCC:Int1-DMR	NA	chr9	98075400	98075744	Oocyte_gDMR	1	1
GPR1-AS:TSS-DMR	NA	chr2	207066967	207069445	Oocyte_gDMR	3	2
IGF2:alt-TSS-DMR	NA	chr11	2168333	2169768	Sperm_gDMR	2	2
IGF2R:Int2-DMR	NA	chr6	160426558	160427561	Oocyte_gDMR	2	2
MEG3/DLK1:IG-DMR	NA	chr14	101275427	101278058	Sperm_gDMR	2	2
MEG8:Int2-DMR	NA	chr14	101370741	101371419	secondary_DMR	1	1
PPIEL:Ex1-DMR	NA	chr1	40024626	40025540	Oocyte_gDMR	4	3
SNRPN:Int1-DMR1	NA	chr15	25093008	25093829	secondary_DMR	4	3
SVOPL:alt-TSS-DMR	NA	chr7	138348118	138349069	Oocyte_gDMR	2	2
VTRNA2-1:DMR	NA	chr5	135414802	135416645	Oocyte_gDMR	18	17
WDR27:Int13-DMR	NA	chr6	170054504	170055618	Oocyte_gDMR	3	2
WRB:alt-TSS-DMR	NA	chr21	40757510	40758276	Oocyte_gDMR	4	3
ZNF597:3-DMR	NA	chr16	3481801	3482388	Oocyte_gDMR	3	3
SNRPN:Int1-DMR2	1.58778	chr15	25123027	25123905	secondary_DMR	6	6
IGF1R:Int2-DMR	1.57453	chr15	99408496	99409650	Oocyte_gDMR	7	7
ERLIN2:Int6-DMR	1.47752	chr8	37604992	37606088	Oocyte_gDMR	7	7
DIRAS3:Ex2-DMR	1.45895	chr1	68512505	68513486	Oocyte_gDMR	8	7
SNU13:alt-TSS-DMR	1.34115	chr22	42077774	42078873	Oocyte_gDMR	8	8
NNAT:TSS-DMR	1.11728	chr20	36148604	36150528	Oocyte_gDMR	37	36
KCNQ1OT1:TSS-DMR	0.999473	chr11	2719948	2722259	Oocyte_gDMR	26	25
MEST:alt-TSS-DMR	0.969414	chr7	130130122	130134388	Oocyte_gDMR	55	51
INPP5F:Int2-DMR	0.968608	chr10	121578046	121578727	Oocyte_gDMR	6	6
GRB10:alt-TSS-DMR	0.956889	chr7	50848726	50851312	Oocyte_gDMR	10	10
GNAS-A/B:TSS-DMR	0.956889	chr20	57463265	57465201	secondary_DMR	40	39
PEG10:TSS-DMR	0.935269	chr7	94285537	94287960	Oocyte_gDMR	51	51
H19/IGF2:IG-DMR	0.909022	chr11	2018812	2024740	Sperm_gDMR	44	35
GNAS-AS1:TSS-DMR	0.909022	chr20	57425649	57428033	Oocyte_gDMR	62	60
GNAS-XL:Ex1-DMR	0.877962	chr20	57428905	57431463	Oocyte_gDMR	7	6
ZDBF2/GPR1:IG-DMR	0.842424	chr2	207114583	207136544	Sperm_gDMR-secondary_DMR	15	15
DIRAS3:TSS-DMR	0.800392	chr1	68515433	68517545	Oocyte_gDMR	24	21
IGF2:Ex9-DMR	0.753198	chr11	2153991	2155112	secondary_DMR	10	10
MKRN3:TSS-DMR	0.753198	chr15	23807086	23812495	Oocyte_gDMR-secondary_DMR	17	13
SNRPN:alt-TSS-DMR	0.753198	chr15	25068564	25069481	secondary_DMR	8	7
PLAGL1:alt-TSS-DMR	0.699772	chr6	144328078	144329888	Oocyte_gDMR	17	15
MCTS2P:TSS-DMR	0.699772	chr20	30134663	30135933	Oocyte_gDMR	8	8
RB1:Int2-DMR	0.639457	chr13	48892341	48895763	Oocyte_gDMR	13	10
MAGEL2:TSS-DMR	0.639457	chr15	23892425	23894029	secondary_DMR	9	9
ZNF597:TSS-DMR	0.571355	chr16	3492828	3494463	secondary_DMR	16	14
FAM50B:TSS-DMR	0.494183	chr6	3849082	3850359	Oocyte_gDMR	24	21
SNURF:TSS-DMR	0.494183	chr15	25200004	25201976	Oocyte_gDMR	10	10
NAP1L5:TSS-DMR	0.480433	chr4	89618184	89619237	Oocyte_gDMR	14	14
PEG13:TSS-DMR	0.405977	chr8	141108147	141111081	Oocyte_gDMR	9	8
L3MBTL1:alt-TSS-DMR	0.405977	chr20	42142365	42144040	Oocyte_gDMR	26	25
GNAS-NESP:TSS-DMR	0.405977	chr20	57414039	57418612	secondary_DMR	26	25
HTR5A:TSS-DMR	0.303375	chr7	154862719	154863382	Oocyte_gDMR	8	8
NDN:TSS-DMR	0.303375	chr15	23931451	23932759	secondary_DMR	10	10
ZNF331:alt-TSS-DMR1	0.303375	chr19	54040510	54042212	Oocyte_gDMR	18	13
MEG3:TSS-DMR	0.179256	chr14	101290524	101293978	secondary_DMR	35	35
PEG3:TSS-DMR	0.179256	chr19	57348493	57353271	Oocyte_gDMR	36	34
ZNF331:alt-TSS-DMR2	0	chr19	54057086	54058425	Oocyte_gDMR	13	7

## Sheet: S4
Table S4. Methylation array results for 65 BWS patients. In black are indicated the hypomethylation, in red the hypermethylation
Samples	DIRAS3:TSS-DMR	NAP1L5:TSS-DMR	FAM50B:TSS-DMR	PLAGL1:alt-TSS-DMR	GRB10:alt-TSS-DMR	PEG10:TSS-DMR	MEST:alt-TSS-DMR	HTR5A:TSS-DMR	PEG13:TSS-DMR	INPP5F:Int2-DMR	H19/IGF2:IG-DMR	KCNQ1OT1:TSS-DMR	RB1:Int2-DMR	SNURF:TSS-DMR	ZNF331:alt-TSS-DMR1	ZNF331:alt-TSS-DMR2	PEG3:TSS-DMR	MCTS2P:TSS-DMR	NNAT:TSS-DMR	L3MBTL1:alt-TSS-DMR	GNAS-NESP:TSS-DMR	GNAS-AS1:TSS-DMR	GNAS-XL:Ex1-DMR	GNAS-A/B:TSS-DMR	SNU13:alt-TSS-DMR
C1	0.547309	0.554229	0.530288	0.540719	0.487896	0.496667	0.538019	0.52112	0.554592	0.706241	0.595096	0.515162	0.530958	0.528162	0.464993	0.556518	0.548584	0.485976	0.678153	0.510512	0.525962	0.494907	0.50443	0.566957	0.448683
C2	0.491797	0.57472	0.527656	0.510517	0.514773	0.500424	0.562711	0.600657	0.577961	0.668473	0.601908	0.522818	0.535392	0.540755	0.476984	0.570775	0.565165	0.484024	0.703525	0.547343	0.52807	0.499194	0.542253	0.459383	0.521682
C3	0.56794	0.517577	0.535923	0.55116	0.505459	0.501046	0.6138	0.530202	0.543193	0.696337	0.61634	0.515417	0.524707	0.547329	0.471768	0.558183	0.547933	0.516003	0.669136	0.540554	0.514406	0.525098	0.554162	0.538019	0.518375
C4	0.574647	0.570803	0.541242	0.575471	0.527139	0.49815	0.611649	0.648762	0.586086	0.662029	0.600785	0.500749	0.52106	0.548828	0.4648	0.534152	0.555538	0.517834	0.698521	0.556018	0.487367	0.554301	0.555435	0.532174	0.519065
C5	0.570318	0.570412	0.547701	0.503395	0.521811	0.492414	0.611111	0.577649	0.563413	0.709626	0.619383	0.516456	0.529736	0.556045	0.473432	0.558841	0.557083	0.514797	0.687344	0.53041	0.489779	0.517611	0.563784	0.550732	0.52769
C6	0.57474	0.586926	0.557347	0.595255	0.529878	0.50502	0.631529	0.547874	0.566006	0.680535	0.628877	0.532553	0.544	0.572783	0.479762	0.567053	0.554541	0.535806	0.791778	0.548527	0.499943	0.548965	0.55536	0.557403	0.553654
C7	0.524495	0.557032	0.517121	0.51071	0.489027	0.51063	0.521848	0.527269	0.590219	0.670855	0.593873	0.494617	0.568406	0.54899	0.485933	0.577433	0.576999	0.497544	0.650094	0.558531	0.505883	0.490528	0.552192	0.555811	0.522514
C8	0.538894	0.556359	0.505732	0.513128	0.501752	0.509206	0.543375	0.577421	0.588763	0.717663	0.585207	0.495673	0.546601	0.546746	0.500779	0.574222	0.559057	0.47683	0.760482	0.510771	0.516623	0.500419	0.546226	0.528455	0.385552
C9	0.537889	0.635687	0.538788	0.485405	0.54223	0.518986	0.56281	0.595976	0.600743	0.67695	0.604059	0.482535	0.582969	0.581712	0.505206	0.582863	0.611461	0.526614	0.647159	0.572939	0.530774	0.54787	0.538168	0.552757	0.544538
C10	0.500876	0.555574	0.539436	0.519316	0.526892	0.507747	0.595602	0.591868	0.583373	0.684654	0.62072	0.4953	0.547849	0.539466	0.470299	0.553348	0.565338	0.473199	0.762284	0.538634	0.536305	0.519971	0.536755	0.545745	0.528802
C11	0.535888	0.561185	0.524514	0.514797	0.501517	0.514017	0.59009	0.584005	0.587076	0.706702	0.623771	0.490301	0.562682	0.536344	0.465725	0.554669	0.568408	0.474732	0.741488	0.544694	0.542668	0.511304	0.527957	0.53896	0.525739
C12	0.514119	0.49383	0.521334	0.509899	0.514835	0.48852	0.543864	0.564548	0.565819	0.693392	0.58649	0.484251	0.550325	0.53881	0.454827	0.545545	0.56813	0.462415	0.658942	0.519178	0.523327	0.489415	0.518341	0.518237	0.473926
C13	0.527067	0.556926	0.544079	0.519389	0.503361	0.526363	0.541283	0.564109	0.566876	0.683804	0.607308	0.502381	0.566083	0.542124	0.463127	0.550291	0.561258	0.500621	0.646581	0.576031	0.531032	0.52226	0.524663	0.531231	0.492402
C14	0.531671	0.548839	0.538548	0.497883	0.488102	0.500995	0.535278	0.567157	0.556246	0.698922	0.592962	0.504882	0.5365	0.527416	0.461474	0.533748	0.560263	0.45085	0.684517	0.525663	0.543124	0.492991	0.508413	0.509089	0.455548
C17	0.533918	0.530011	0.524674	0.529302	0.472011	0.484777	0.511335	0.55371	0.563416	0.706737	0.579758	0.461977	0.51521	0.505284	0.470424	0.562008	0.543891	0.478023	0.668314	0.527804	0.541152	0.481363	0.484864	0.493939	0.487864
C18	0.481865	0.514386	0.505737	0.531363	0.468131	0.496331	0.55723	0.532379	0.60578	0.649273	0.558394	0.487715	0.479414	0.506541	0.434982	0.532161	0.542904	0.459232	0.775377	0.50847	0.531296	0.486948	0.509622	0.507791	0.475906
C19	0.497174	0.574552	0.52724	0.51091	0.495123	0.495886	0.55705	0.579325	0.556167	0.683518	0.596875	0.487222	0.535329	0.574635	0.456587	0.546349	0.54638	0.535508	0.660577	0.428825	0.530465	0.456408	0.514503	0.481524	0.524597
C20	0.524324	0.540495	0.513457	0.511347	0.456412	0.493461	0.534488	0.580055	0.551349	0.698814	0.596483	0.492226	0.543377	0.516885	0.488412	0.528438	0.544292	0.446367	0.733101	0.556418	0.518455	0.501839	0.497093	0.497441	0.504533
C21	0.53476	0.544018	0.542145	0.476954	0.491053	0.510085	0.532219	0.571491	0.614619	0.651003	0.595138	0.522307	0.52384	0.531725	0.471528	0.567472	0.550062	0.476683	0.692189	0.562782	0.519339	0.459199	0.520942	0.525421	0.492848
C22	0.523315	0.544455	0.537825	0.511214	0.493918	0.495676	0.558173	0.55734	0.574728	0.674196	0.580956	0.509516	0.556262	0.51287	0.49862	0.553838	0.556879	0.472207	0.738093	0.56633	0.525059	0.493919	0.506295	0.507778	0.18734
C23	0.494165	0.555844	0.48417	0.5153	0.48418	0.496955	0.530317	0.5615	0.573278	0.763728	0.581279	0.492877	0.551815	0.518927	0.424939	0.558723	0.571143	0.46871	0.75671	0.475531	0.528845	0.508246	0.516638	0.523185	0.499764
C24	0.493758	0.547407	0.491335	0.53873	0.495469	0.485614	0.547508	0.513537	0.553407	0.647982	0.567777	0.512999	0.511645	0.514663	0.416644	0.57158	0.53343	0.438373	0.67909	0.502444	0.518938	0.490756	0.50337	0.515623	0.441031
C25	0.492984	0.514623	0.518374	0.543906	0.456629	0.474772	0.495314	0.562624	0.546383	0.64941	0.567059	0.475935	0.451526	0.492613	0.40177	0.561236	0.541015	0.448145	0.740335	0.498616	0.539026	0.445959	0.511682	0.484163	0.420404
C26	0.50968	0.578333	0.519094	0.533649	0.47362	0.490595	0.549584	0.562078	0.568071	0.701311	0.58792	0.523698	0.526748	0.528654	0.474056	0.583557	0.539136	0.490349	0.661662	0.535222	0.529221	0.509164	0.511561	0.507916	0.501855
C27	0.548121	0.572631	0.533567	0.523573	0.520904	0.496389	0.541745	0.573344	0.552739	0.669346	0.604658	0.525703	0.545189	0.514059	0.482561	0.550359	0.566517	0.465268	0.689703	0.526076	0.544528	0.495573	0.516134	0.534248	0.499095
C28	0.533588	0.49796	0.519269	0.501822	0.442392	0.519549	0.531037	0.548545	0.58212	0.626254	0.577613	0.50311	0.480376	0.534005	0.441197	0.540369	0.534482	0.460947	0.726909	0.553281	0.508947	0.462817	0.525006	0.487015	0.479494
C29	0.520285	0.525785	0.515186	0.500098	0.469696	0.482337	0.521922	0.538922	0.547394	0.681621	0.573983	0.489449	0.522722	0.510319	0.437071	0.51454	0.551032	0.417868	0.702596	0.518652	0.542201	0.462824	0.484085	0.47775	0.414259
C31	0.487919	0.597417	0.505522	0.452619	0.472795	0.468912	0.504122	0.544899	0.549954	0.56999	0.597949	0.487599	0.486616	0.50264	0.443959	0.524703	0.547709	0.410443	0.635307	0.505414	0.531907	0.476532	0.498161	0.496296	0.397909
C32	0.510855	0.539147	0.50749	0.537819	0.503762	0.495953	0.529793	0.55907	0.583394	0.608638	0.60232	0.53672	0.501657	0.50471	0.458131	0.535731	0.546642	0.466102	0.641687	0.535169	0.557948	0.486941	0.508302	0.505335	0.409054
C33	0.505255	0.553602	0.506182	0.490515	0.478372	0.493625	0.52225	0.542605	0.537753	0.657546	0.608007	0.48528	0.530771	0.513251	0.463909	0.535336	0.549702	0.448983	0.64463	0.517145	0.550839	0.45889	0.502659	0.490807	0.4869
C34	0.513497	0.51785	0.510102	0.542756	0.481879	0.485693	0.517844	0.584082	0.556004	0.613205	0.594534	0.476794	0.504202	0.515464	0.438266	0.545927	0.550926	0.45158	0.688819	0.513448	0.537362	0.45813	0.483996	0.532229	0.449559
C35	0.501148	0.534809	0.481889	0.527256	0.519265	0.476425	0.521548	0.516291	0.532647	0.614875	0.588641	0.47044	0.522752	0.514247	0.47392	0.539165	0.52958	0.444568	0.591266	0.503633	0.514768	0.430127	0.483879	0.503093	0.400352
C36	0.533957	0.550069	0.523987	0.501673	0.474937	0.500999	0.531675	0.563939	0.544396	0.706082	0.568201	0.542793	0.552884	0.505049	0.453468	0.525664	0.566182	0.470733	0.797555	0.512185	0.532035	0.472309	0.490501	0.476388	0.483102
C37	0.516016	0.533298	0.51044	0.451624	0.450359	0.488571	0.497542	0.536861	0.540659	0.678936	0.5766	0.515181	0.479242	0.496744	0.435541	0.503033	0.530167	0.441903	0.700314	0.503817	0.501308	0.487392	0.482791	0.472468	0.402309
C38	0.499082	0.540225	0.507466	0.519857	0.444022	0.488157	0.495034	0.569164	0.53756	0.67413	0.594794	0.502988	0.493573	0.497202	0.449493	0.543531	0.534829	0.447714	0.648717	0.510852	0.513565	0.482026	0.485943	0.484907	0.461424
C39	0.502411	0.544088	0.521273	0.484647	0.455439	0.495014	0.504661	0.553988	0.531819	0.751075	0.573007	0.524939	0.541042	0.495173	0.422307	0.502648	0.533885	0.453108	0.630767	0.514613	0.514796	0.467613	0.455566	0.478847	0.472262
C40	0.486928	0.53996	0.48169	0.518248	0.498658	0.489412	0.497365	0.559817	0.549563	0.657058	0.575703	0.472937	0.525888	0.502603	0.433753	0.513177	0.527869	0.437602	0.623105	0.50454	0.513858	0.409568	0.453391	0.437076	0.448147
P1	0.544721	0.477172	0.362803	0.320191	0.468284	0.501952	0.406641	0.528146	0.545184	0.641201	0.562485	0.303279	0.498917	0.335771	0.414294	0.543893	0.534493	0.219828	0.600231	0.400283	0.763477	0.229806	0.273194	0.331018	0.496158
P2	0.203143	0.580208	0.547824	0.542777	0.378846	0.494531	0.226554	0.477828	0.571505	0.662268	0.451006	0.116723	0.578259	0.547367	0.441225	0.552961	0.532947	0.480461	0.51938	0.547468	0.509337	0.425661	0.444541	0.506082	0.111372
P3	0.442491	0.487611	0.481982	0.485968	0.415684	0.438417	0.477885	0.578931	0.562286	0.680634	0.603803	0.236525	0.339867	0.302283	0.266824	0.407017	0.317809	0.224406	0.496084	0.27145	0.739935	0.299313	0.328539	0.326924	0.145211
P4	0.452672	0.473397	0.498211	0.442173	0.446898	0.453998	0.488102	0.581778	0.411098	0.590271	0.539591	0.291085	0.485862	0.482121	0.322423	0.453169	0.486604	0.449021	0.607629	0.511171	0.542399	0.463814	0.512923	0.496167	0.110299
P5	0.54105	0.496033	0.505262	0.562315	0.487386	0.509214	0.546658	0.544611	0.586681	0.777266	0.612015	0.152697	0.560403	0.550296	0.437642	0.54706	0.571254	0.263269	0.696193	0.542867	0.561297	0.282922	0.318604	0.460916	0.274634
P6	0.495099	0.547024	0.505375	0.49323	0.469053	0.492782	0.409047	0.551174	0.541352	0.637486	0.573021	0.233817	0.527599	0.515396	0.402014	0.534634	0.517414	0.314365	0.463793	0.515205	0.603012	0.292181	0.324074	0.394433	0.149352
P7	0.479876	0.500282	0.434114	0.360572	0.469513	0.473335	0.498697	0.531455	0.558881	0.643501	0.588174	0.176791	0.520843	0.514926	0.379776	0.509982	0.527716	0.442117	0.636926	0.509388	0.541457	0.404401	0.457075	0.47002	0.25652
P8	0.457372	0.56044	0.540611	0.158851	0.524741	0.528865	0.202287	0.544427	0.345639	0.648871	0.587539	0.163532	0.200035	0.519685	0.224529	0.563405	0.556865	0.44825	0.379215	0.140701	0.552714	0.266001	0.343981	0.449778	0.142366
P9	0.392258	0.523549	0.499229	0.529396	0.318842	0.534298	0.581565	0.528454	0.562193	0.686705	0.58509	0.0657102	0.59004	0.508343	0.112389	0.118799	0.496455	0.444979	0.671825	0.53951	0.537401	0.502679	0.509852	0.490902	0.451735
P10	0.53417	0.570015	0.537244	0.524779	0.526822	0.537784	0.577076	0.555501	0.543186	0.656521	0.577455	0.0410266	0.545326	0.505243	0.473807	0.549076	0.5476	0.451492	0.68651	0.541806	0.517068	0.306025	0.315209	0.403671	0.112475
P11	0.543259	0.547579	0.562185	0.535026	0.572807	0.537484	0.339363	0.546208	0.591915	0.634725	0.595885	0.244766	0.582089	0.532389	0.47754	0.567064	0.555182	0.447452	0.57	0.561498	0.656253	0.329698	0.365539	0.397277	0.473674
P12	0.542817	0.414013	0.449725	0.515868	0.221025	0.0392172	0.472167	0.52518	0.5729	0.728319	0.597861	0.120327	0.436654	0.529487	0.508799	0.542793	0.527508	0.453356	0.600717	0.555104	0.518544	0.407232	0.484227	0.49658	0.507658
P13	0.542446	0.143069	0.143358	0.146867	0.544726	0.523994	0.18163	0.59061	0.598383	0.60066	0.588306	0.163432	0.563878	0.528624	0.50652	0.568451	0.537355	0.458615	0.68664	0.557231	0.554265	0.466538	0.484098	0.510944	0.525293
P14	0.199081	0.610932	0.492896	0.534021	0.178057	0.54502	0.576434	0.607012	0.604114	0.723191	0.608913	0.183941	0.482661	0.526026	0.485354	0.582058	0.558877	0.485271	0.627246	0.562986	0.541479	0.461995	0.517119	0.527456	0.0976276
P15	0.482545	0.542458	0.48643	0.337948	0.489815	0.478164	0.371424	0.530641	0.552104	0.577062	0.579957	0.338522	0.515142	0.540514	0.45919	0.543397	0.548746	0.456507	0.605048	0.535102	0.53354	0.396115	0.421825	0.473434	0.281912
P16	0.476902	0.43725	0.394638	0.391101	0.36602	0.446406	0.455183	0.533888	0.505892	0.427934	0.559073	0.157561	0.442984	0.48972	0.319335	0.456892	0.477453	0.397143	0.523745	0.378648	0.662438	0.20722	0.27415	0.262154	0.111151
P17	0.481608	0.543251	0.500181	0.195003	0.480872	0.480599	0.507207	0.504278	0.573122	0.623377	0.538796	0.156572	0.483404	0.503861	0.416583	0.537007	0.535557	0.456738	0.735677	0.538677	0.5177	0.439348	0.494009	0.505174	0.377727
P18	0.262501	0.53182	0.46294	0.548213	0.493132	0.219946	0.319678	0.48802	0.54066	0.662973	0.582142	0.134546	0.523928	0.536489	0.323502	0.532919	0.527022	0.446593	0.561787	0.260213	0.81299	0.199333	0.216842	0.275442	0.405762
P19	0.469401	0.548022	0.533599	0.494177	0.501442	0.555858	0.541741	0.581185	0.558583	0.67249	0.581025	0.317032	0.514139	0.511875	0.478222	0.520404	0.542959	0.457989	0.612838	0.588165	0.511728	0.501692	0.536149	0.518669	0.562273
P20	0.521318	0.548234	0.484864	0.549699	0.505934	0.497637	0.536342	0.679039	0.585803	0.618231	0.592356	0.325615	0.647782	0.52974	0.461189	0.526684	0.544271	0.46903	0.615358	0.342635	0.53025	0.459012	0.518466	0.48713	0.432008
P21	0.501628	0.422174	0.531483	0.524109	0.50484	0.496338	0.537666	0.563452	0.570131	0.653614	0.588621	0.207699	0.51065	0.51639	0.425007	0.558389	0.516721	0.478127	0.452038	0.549471	0.698681	0.267689	0.272623	0.300451	0.450513
P22	0.517262	0.554979	0.522923	0.526846	0.501764	0.491892	0.517402	0.526661	0.560755	0.592635	0.562501	0.0369986	0.492668	0.506496	0.452892	0.56466	0.562638	0.458311	0.572319	0.546999	0.538514	0.464146	0.50219	0.512795	0.472584
P23	0.524862	0.513269	0.409674	0.482739	0.466767	0.401761	0.540434	0.542086	0.608587	0.625053	0.558828	0.187827	0.472177	0.520573	0.458233	0.537649	0.523292	0.443107	0.654946	0.552155	0.485493	0.496461	0.503091	0.515375	0.196875
P24	0.524587	0.561042	0.503224	0.534367	0.501605	0.500276	0.549146	0.522178	0.563457	0.646174	0.572293	0.221385	0.517419	0.514049	0.468848	0.571299	0.546905	0.452392	0.619321	0.528843	0.518637	0.48649	0.513844	0.486982	0.501851
P25	0.46029	0.520652	0.51196	0.407069	0.45922	0.539651	0.541903	0.556442	0.563797	0.564253	0.586078	0.127138	0.567559	0.508533	0.441392	0.531652	0.538087	0.442946	0.647383	0.458853	0.506128	0.466324	0.512269	0.497358	0.127491
P26	0.467057	0.331519	0.524535	0.289642	0.264166	0.504679	0.521003	0.54245	0.583013	0.567661	0.599365	0.326376	0.517057	0.531137	0.485958	0.561709	0.460407	0.469971	0.480094	0.551959	0.562383	0.31935	0.419832	0.476478	0.241557
P27	0.452868	0.534671	0.500179	0.528179	0.473774	0.484939	0.516851	0.546881	0.571951	0.601026	0.578559	0.286346	0.515291	0.506177	0.458238	0.549244	0.53836	0.463124	0.676322	0.462785	0.548992	0.443424	0.478966	0.482578	0.456924
P28	0.454316	0.543965	0.502076	0.537826	0.503895	0.496772	0.52489	0.539607	0.568687	0.619391	0.579759	0.29048	0.518984	0.510762	0.467046	0.550663	0.532775	0.447848	0.674589	0.450846	0.55682	0.436663	0.462462	0.485088	0.455089
P29	0.479786	0.527014	0.501571	0.508788	0.446493	0.474356	0.500884	0.526043	0.548122	0.670734	0.584111	0.15397	0.49188	0.509905	0.437844	0.514387	0.538697	0.431483	0.70186	0.523473	0.507989	0.40959	0.487568	0.469673	0.43873
P30	0.358859	0.511794	0.471619	0.196132	0.503329	0.478329	0.524937	0.555145	0.554623	0.640122	0.584451	0.204909	0.478259	0.516303	0.45889	0.545395	0.526009	0.42511	0.645235	0.53691	0.524591	0.452288	0.492641	0.482955	0.122367
P31	0.493179	0.514392	0.41642	0.49887	0.485997	0.455081	0.464862	0.562274	0.556997	0.602278	0.573761	0.130805	0.559777	0.51013	0.287832	0.415806	0.552982	0.419427	0.580011	0.484668	0.586587	0.299382	0.373401	0.435597	0.355598
P32	0.461614	0.52704	0.493586	0.496068	0.483343	0.482651	0.503745	0.560133	0.521128	0.633554	0.57692	0.183344	0.517644	0.516271	0.439637	0.533011	0.530323	0.443715	0.616106	0.506068	0.545638	0.405716	0.462418	0.476393	0.369991
P33	0.463894	0.524053	0.514629	0.471195	0.459713	0.475028	0.505298	0.51608	0.533748	0.658259	0.584233	0.118619	0.521026	0.517895	0.436535	0.530552	0.52777	0.436481	0.590771	0.493734	0.515754	0.426583	0.462377	0.482681	0.402498
P34	0.489206	0.527606	0.492118	0.441947	0.453524	0.473466	0.517262	0.588325	0.526106	0.649349	0.572556	0.118407	0.549965	0.505274	0.422526	0.524037	0.526339	0.427708	0.593162	0.510284	0.54678	0.457089	0.469593	0.487418	0.393244
P35	0.512891	0.528108	0.51096	0.464043	0.482138	0.485722	0.505525	0.536837	0.547821	0.664107	0.587367	0.327847	0.576288	0.513073	0.454513	0.52302	0.533365	0.438042	0.621241	0.510145	0.529067	0.457792	0.473107	0.479534	0.417709
P36	0.515831	0.52192	0.49471	0.490818	0.460871	0.478856	0.504259	0.532219	0.558177	0.693342	0.590581	0.141906	0.512282	0.516857	0.444018	0.521678	0.544063	0.430695	0.649623	0.511794	0.555025	0.464042	0.474636	0.472452	0.397155
P37	0.492856	0.544589	0.511844	0.488526	0.477737	0.484213	0.515202	0.57029	0.538811	0.636808	0.566853	0.273381	0.582308	0.508943	0.426218	0.521569	0.511965	0.44362	0.568083	0.502444	0.51034	0.442838	0.48152	0.496707	0.415664
P38	0.482677	0.505476	0.492357	0.450324	0.500242	0.468902	0.495885	0.609428	0.547231	0.622876	0.573406	0.171523	0.511719	0.500402	0.428025	0.520608	0.526617	0.417238	0.579174	0.501974	0.521815	0.442345	0.463265	0.470675	0.417177
P39	0.511305	0.518755	0.501542	0.530488	0.490653	0.476766	0.514545	0.568767	0.532297	0.658561	0.581888	0.171118	0.56665	0.519197	0.446703	0.523493	0.53707	0.408615	0.652867	0.500799	0.52791	0.456305	0.481999	0.491575	0.42415
P40	0.519313	0.558003	0.528354	0.485848	0.497888	0.497621	0.526466	0.562169	0.571714	0.610808	0.593382	0.0650961	0.529629	0.557456	0.458059	0.509189	0.522715	0.46853	0.578901	0.543258	0.531461	0.453615	0.488733	0.489976	0.416316
P41	0.466657	0.545952	0.480845	0.474652	0.475237	0.495608	0.524596	0.541651	0.549159	0.628134	0.602499	0.253418	0.519541	0.535411	0.455623	0.526994	0.534131	0.451937	0.658062	0.515159	0.534087	0.492506	0.507318	0.492958	0.371751
P42	0.432616	0.547874	0.46708	0.493677	0.485785	0.498844	0.545757	0.603121	0.544043	0.61513	0.577995	0.179607	0.524597	0.535041	0.423779	0.524982	0.519253	0.793495	0.569347	0.46083	0.526953	0.461222	0.484632	0.514721	0.426396
P43	0.500014	0.528955	0.507493	0.453437	0.471543	0.484753	0.516894	0.523476	0.530222	0.62708	0.585361	0.0952675	0.520521	0.513479	0.418484	0.516336	0.53961	0.429046	0.628094	0.502618	0.527964	0.475629	0.495742	0.486095	0.443829
P44	0.467401	0.515531	0.529326	0.52008	0.457934	0.467337	0.50805	0.498833	0.521181	0.65841	0.572412	0.266267	0.505067	0.512075	0.459535	0.499911	0.525486	0.431875	0.665137	0.499069	0.515969	0.418014	0.469969	0.475855	0.40426
P45	0.49035	0.539319	0.50616	0.474941	0.479947	0.490864	0.507648	0.535555	0.55234	0.706914	0.573856	0.0507033	0.536017	0.519956	0.438006	0.527889	0.543302	0.450925	0.683602	0.512842	0.540728	0.449604	0.490999	0.500442	0.46195
P46	0.472669	0.543242	0.505805	0.53268	0.488098	0.487478	0.517158	0.613333	0.544424	0.61246	0.590016	0.311342	0.543336	0.521024	0.447906	0.534481	0.522588	0.444229	0.616939	0.507307	0.518902	0.446354	0.494773	0.478403	0.421275
P47	0.517743	0.547689	0.509208	0.466272	0.490581	0.486571	0.522258	0.63266	0.553278	0.677083	0.59325	0.0514314	0.536528	0.522018	0.444356	0.536231	0.537311	0.443624	0.599902	0.511733	0.551976	0.489488	0.4781	0.486051	0.452718
P48	0.501456	0.461149	0.50442	0.476283	0.471006	0.473036	0.493567	0.57791	0.528856	0.635931	0.557463	0.387055	0.510997	0.511515	0.453772	0.538213	0.53448	0.429887	0.588725	0.491233	0.511684	0.485667	0.494078	0.468921	0.452404
P49	0.498544	0.539224	0.507079	0.47863	0.459209	0.486897	0.510438	0.583847	0.528309	0.697906	0.577152	0.173004	0.512926	0.512994	0.455469	0.533207	0.530187	0.462906	0.585115	0.513354	0.516329	0.431794	0.481176	0.493803	0.423085
P50	0.506705	0.546607	0.517048	0.485067	0.47293	0.482485	0.524783	0.552665	0.52995	0.651002	0.587623	0.120844	0.525343	0.531689	0.458734	0.542465	0.543005	0.438075	0.587422	0.510508	0.545671	0.476395	0.484935	0.493683	0.431384
P51	0.528666	0.536143	0.523592	0.492405	0.500856	0.494029	0.526892	0.592233	0.546304	0.684035	0.598247	0.321018	0.525357	0.520988	0.492421	0.546527	0.551556	0.448768	0.706718	0.511127	0.543862	0.490009	0.510076	0.497392	0.449466
P52	0.455496	0.534335	0.520406	0.526413	0.500114	0.477734	0.535362	0.480145	0.545066	0.481591	0.598688	0.138605	0.568916	0.520301	0.161434	0.203119	0.504288	0.438794	0.597881	0.513894	0.5417	0.383541	0.434571	0.500969	0.218722
P53	0.450265	0.52564	0.414559	0.453796	0.445256	0.470869	0.496114	0.527362	0.529036	0.649922	0.568022	0.0590878	0.465958	0.483923	0.443405	0.525195	0.516921	0.432266	0.579321	0.493809	0.569145	0.344166	0.339995	0.390478	0.466801
P54	0.512027	0.526085	0.49634	0.469166	0.449642	0.476652	0.486998	0.636773	0.536484	0.656139	0.575866	0.0534248	0.498729	0.495171	0.397648	0.490298	0.489716	0.43416	0.60917	0.48986	0.520369	0.452797	0.45423	0.469281	0.425919
P55	0.499704	0.542715	0.48786	0.499783	0.453985	0.493293	0.518875	0.57262	0.525231	0.740494	0.590152	0.0490062	0.524606	0.494311	0.45446	0.526614	0.553376	0.449187	0.631796	0.513147	0.514838	0.447009	0.481536	0.493482	0.501885
P56	0.468362	0.462569	0.441183	0.476806	0.419687	0.394912	0.474758	0.583643	0.566924	0.598364	0.569231	0.232865	0.459238	0.517934	0.406606	0.536464	0.549501	0.336544	0.572392	0.512994	0.525343	0.428824	0.495776	0.422933	0.106064
P57	0.530971	0.535343	0.511328	0.487141	0.486593	0.487267	0.519499	0.521268	0.551994	0.635892	0.574345	0.320158	0.552319	0.497708	0.41232	0.541568	0.530419	0.461457	0.715142	0.510181	0.53008	0.452447	0.487077	0.47612	0.442071
P58	0.351145	0.538902	0.50584	0.529583	0.482092	0.48365	0.513803	0.507544	0.522598	0.564352	0.561381	0.168059	0.44734	0.496431	0.468517	0.548196	0.511618	0.452855	0.453218	0.451956	0.528126	0.467762	0.47911	0.484642	0.134248
P59	0.480954	0.497364	0.54299	0.4844	0.515799	0.486083	0.503348	0.54293	0.556549	0.574427	0.575689	0.0391966	0.529785	0.525274	0.463987	0.538812	0.500347	0.489242	0.565466	0.509671	0.504369	0.451231	0.458695	0.50216	0.458338
P60	0.48792	0.535489	0.0927759	0.488144	0.48047	0.480079	0.499768	0.470006	0.532697	0.619515	0.563722	0.171362	0.49976	0.475516	0.401553	0.259569	0.536993	0.435693	0.60036	0.491368	0.517972	0.463434	0.468749	0.465909	0.355333
P61	0.493641	0.544921	0.53308	0.47664	0.509985	0.485462	0.51267	0.612377	0.530006	0.568952	0.573607	0.0874693	0.485466	0.482164	0.46317	0.552141	0.526743	0.442697	0.575711	0.510004	0.514224	0.461806	0.474813	0.481518	0.436506
P62	0.515943	0.52677	0.515254	0.489317	0.495429	0.490948	0.531797	0.500669	0.526146	0.683761	0.578256	0.14795	0.527023	0.482984	0.452036	0.539681	0.52994	0.44059	0.665215	0.511224	0.532208	0.436879	0.464144	0.466464	0.44273
P63	0.519153	0.497751	0.558924	0.501876	0.414809	0.480415	0.534775	0.569217	0.669201	0.708112	0.593071	0.105987	0.512354	0.523334	0.458693	0.558865	0.575803	0.442145	0.704332	0.534686	0.533854	0.441143	0.529521	0.450551	0.449687
P64	0.503195	0.533086	0.510612	0.45183	0.475867	0.479715	0.528541	0.557201	0.537777	0.673907	0.582903	0.188476	0.527668	0.503888	0.45818	0.546491	0.533216	0.444399	0.619177	0.510225	0.527999	0.461607	0.475519	0.499801	0.418131

## Sheet: S5
Table S5. Probe coordinates.
iDMRs		MS-MLPA assay ME034-B1			Methylation Array(GRCh37/hg19)		Overlapping CpGs between MS-MLPA and EPIC
Name	Position in GRCh37/hg19	Probe number	Region covered by MS-MLPA probes	number CpGs	Region covered by Methylation Array probes	number CpGs
PLAGL1:alt-TSS-DMR	chr6:144,328,078-144,329,888	18460-L24410	chr6:144,328,907-144,328,970	1	chr6:144,328,421-144,329,887	15	NO
GRB10:alt-TSS-DMR	chr7:50,848,726-50,851,312	15744-L24405	chr7:50,850,501-50,850,561	1	chr7:50,849,168-50,850,870	10	NO
MEST:alt-TSS-DMR	chr7:130,130,122-130,134,388	19546-L17775	chr7:130,131,350-130,131,413	2	chr7:130,130,122-130,134,256	51	chr7:130,131,403-130,131,403 (cg04678950)
		21198-L17768	chr7:130,132,134-130,132,188				chr7:130,132,161-130,132,161 (cg05556276)
H19/IGF2:IG-DMR	chr11:2,018,812-2,024,740	06266-L05772	chr11:2,019,379-2,019,430	3	chr11:2,019,079-2,024,126	35	NO
		14063-L08764	chr11:2,019,693-2,019,745				chr11:2,019,736-2,019,736 (cg01977486)
		08743-L20532	chr11:2,020,007-2,020,055				NO
KCNQ1OT1:TSS-DMR	chr11:2,719,948-2,722,259	07171-L06780	chr11:2,720,542-2,720,594	2	chr11:2,720,229-2,722,195	25	NO
		07172-L06781	chr11:2,721,017-2,721,068				NO
MEG3:TSS-DMR	chr14:101,290,524-101,293,978	15754-L18942	chr14:101,292,046-101,292,109	2	chr14:101,290,556-101,293,856	35	NO
		19547-L25282	chr14:101,292,326-101,292,391				NO
SNURF:TSS-DMR	chr15:25,200,004-25,201,976	04106-L13905	chr15:25,200,121-25,200,178	2	chr15:25,200,113-25,201,732	10	chr15:25,200,133-25,200,133 (cg17916021)
		04103-L02951	chr15:25,200,680-25,200,739				NO
PEG3:TSS-DMR	chr19:57,348,493-57,353,271	19532-L26047	chr19:57,349,964-57,350,021	3	chr19:57,348,529-57,353,128	34	NO
		19531-L26046	chr19:57,351,691-57,351,751				NO
		12861-L13981	chr19:57,352,215-57,352,278				NO
GNAS-NESP:TSS-DMR	chr20:57,414,039-57,418,612	18126-SP0007- L22614	chr20:57,414,926-57,415,012	1	chr20:57,414,039-57,418,373	25	chr20:57,414,960-57,414,960 (cg14597908)
GNAS-AS1:TSS-DMR	chr20:57,425,649-57,428,033	22363-L22606	chr20:57,426,013-57,426,065	1	chr20:57,425,979-57,427,977	60	NO
GNAS-XL:Ex1-DMR	chr20:57,428,905-57,431,463	19545-L17516	chr20:57,430,117-57,430,171	2	chr20:57,429,025-57,431,303	6	chr20:57,430,133-57,430,133 (cg26711395)
		15645-L26874	chr20:57,430,193-57,430,258				NO
GNAS A/B:TSS-DMR	chr20:57,463,265-57,465,201	03882-L22603	chr20:57,464,367-57,464,424	2	chr20:57,463,265-57,465,175	39	NO

## Sheet: S6
Table S6. DMPs analysis
probeID	C1	C2	C3	C4	C5	C6	C7	C8	C9	C10	C11	C12	C13	C14	C17	C18	C19	C20	C21	C22	C23	C24	C25	C26	C27	C28	C29	C31	C32	C33	C34	C35	C36	C37	C38	C39	C40	P1	P2	P3	P4	P5	P6	P7	P8	P9	P10	P11	P12
cg05650511	0.63212	0.675275	0.59443	0.658554	0.653455	0.74354	0.378137	0.632701	0.741348	0.740452	0.684714	0.719032	0.779186	0.605293	0.652641	0.759298	0.704888	0.662528	0.584468	0.60332	0.581147	0.758676	0.579207	0.663527	0.673984	0.69747	0.629432	0.77872	0.762411	0.667602	0.714381	0.842132	0.654483	0.577359	0.644766	0.646864	0.566898	0.678972	0.678067	0.723963	0.855644	0.66312	0.60822	0.813035	0.59157	0.661679	0.615002	0.884542	0.712666
cg10732921	0.304452	0.260368	0.31678	0.281999	0.316117	0.297007	0.159855	0.262126	0.340121	0.345369	0.326806	0.29197	0.410153	0.215484	0.399575	0.454911	0.274437	0.349462	0.272714	0.246614	0.230595	0.411666	0.225565	0.23905	0.288174	0.395698	0.230399	0.546701	0.390409	0.302793	0.331517	0.547955	0.202881	0.200221	0.235914	0.246255	0.212062	0.35991	0.350898	0.324357	0.533031	0.236566	0.207462	0.449217	0.231309	0.236946	0.346016	0.637231	0.337954
cg04957307	0.815311	0.919788	0.883694	0.853369	0.887451	0.796962	0.948272	0.904092	0.863135	0.860326	0.896364	0.851077	0.875068	0.864334	0.840353	0.841345	0.860702	0.815137	0.904824	0.921831	0.901545	0.79882	0.828853	0.84687	0.911294	0.896127	0.841324	0.801708	0.835193	0.820448	0.870186	0.741903	0.912649	0.911035	0.899953	0.93417	0.92771	0.915836	0.824702	0.799534	0.608067	0.8584	0.818455	0.718419	0.876409	0.878281	0.830158	0.672688	0.823939
cg07281747	0.318239	0.373926	0.349914	0.31491	0.407604	0.471246	0.183353	0.36916	0.435827	0.490939	0.385561	0.355847	0.378071	0.257566	0.338756	0.566266	0.23099	0.475294	0.358336	0.349922	0.220539	0.625012	0.276754	0.340772	0.333724	0.486482	0.237392	0.493282	0.442324	0.312474	0.47221	0.656359	0.281199	0.284905	0.398728	0.251571	0.36376	0.357709	0.336145	0.532605	0.694731	0.322231	0.232763	0.509588	0.225059	0.334658	0.317422	0.698692	0.430161
cg08800144	0.522029	0.434372	0.341285	0.479523	0.565943	0.560098	0.248285	0.444212	0.570059	0.531289	0.521032	0.505033	0.508254	0.449191	0.5219	0.742509	0.499539	0.638231	0.362903	0.4421	0.4757	0.721215	0.575625	0.585304	0.514175	0.395018	0.542936	0.411358	0.611906	0.576612	0.470867	0.517838	0.550982	0.397019	0.450495	0.513647	0.386703	0.491126	0.553526	0.522272	0.731826	0.53783	0.470536	0.681717	0.47444	0.493784	0.533575	0.650018	0.558125
cg17295556	0.540669	0.480771	0.421488	0.573177	0.574284	0.586139	0.2807	0.514592	0.533521	0.51668	0.493984	0.488313	0.486177	0.52302	0.572444	0.789146	0.548454	0.664184	0.391556	0.447273	0.540467	0.698172	0.543793	0.630351	0.543798	0.53668	0.620049	0.547001	0.637903	0.612674	0.544482	0.647108	0.588288	0.484261	0.546009	0.491058	0.468154	0.453318	0.535285	0.508954	0.685719	0.554849	0.507383	0.657884	0.381758	0.550563	0.477984	0.675796	0.517844
cg18196453	0.633931	0.488019	0.437184	0.5407	0.658211	0.587195	0.353757	0.472512	0.692899	0.615346	0.561226	0.58487	0.653403	0.576929	0.623926	0.676415	0.616695	0.621732	0.478986	0.583803	0.422575	0.759353	0.505341	0.544627	0.612946	0.541406	0.655594	0.582496	0.642339	0.623281	0.563779	0.738565	0.600986	0.481339	0.517762	0.626778	0.430118	0.645807	0.721293	0.623457	0.793798	0.522224	0.612317	0.747241	0.559897	0.611144	0.579701	0.789213	0.653813
cg24048497	0.264088	0.153275	0.176841	0.21808	0.196511	0.332623	0.0601772	0.175745	0.258359	0.1728	0.188304	0.269323	0.19136	0.230553	0.275983	0.436935	0.270615	0.314734	0.153271	0.171599	0.235538	0.285334	0.255812	0.291036	0.24861	0.133953	0.279393	0.25475	0.253388	0.229969	0.160954	0.375706	0.221229	0.202616	0.199047	0.237813	0.157577	0.17556	0.256585	0.234973	0.461706	0.255019	0.234001	0.374646	0.199053	0.21656	0.216258	0.405793	0.231975
cg01542452	0.219037	0.111782	0.131756	0.195511	0.195923	0.220479	0.0466284	0.145229	0.181748	0.205665	0.145838	0.226631	0.113838	0.177337	0.185882	0.227679	0.190262	0.225286	0.105371	0.114601	0.159524	0.22587	0.161141	0.18979	0.151194	0.135355	0.21673	0.188364	0.207031	0.228015	0.158567	0.288451	0.16177	0.141004	0.143802	0.115297	0.0907051	0.144409	0.180742	0.197694	0.390271	0.195001	0.160345	0.275627	0.110922	0.175068	0.195236	0.289494	0.180416
cg06026160	0.269615	0.158612	0.162309	0.264815	0.2145	0.341128	0.074726	0.183583	0.246488	0.228621	0.194147	0.283378	0.321347	0.203724	0.316001	0.347455	0.311678	0.386271	0.12693	0.151238	0.177355	0.359923	0.221251	0.327515	0.232576	0.114646	0.276236	0.301977	0.317249	0.278109	0.269697	0.405742	0.164709	0.136769	0.185874	0.205198	0.102424	0.204755	0.294229	0.320685	0.597598	0.219175	0.225416	0.44212	0.20619	0.241458	0.294435	0.538638	0.258563
cg07222015	0.188666	0.136425	0.221434	0.119692	0.191201	0.144154	0.0840021	0.13176	0.311352	0.234542	0.215216	0.250941	0.264339	0.136478	0.244463	0.177925	0.187523	0.176578	0.0904234	0.216339	0.0831264	0.192612	0.303675	0.109055	0.206354	0.391733	0.192785	0.253937	0.232344	0.165398	0.183066	0.292526	0.0359596	0.0533775	0.123225	0.0675984	0.0951802	0.208295	0.323722	0.30313	0.309516	0.100394	0.0807798	0.282395	0.406703	0.146207	0.204072	0.302212	0.352008
cg22512670	0.641619	0.682348	0.653581	0.660012	0.711168	0.697128	0.503872	0.564872	0.764746	0.712562	0.689413	0.698003	0.744202	0.595276	0.711202	0.77076	0.679916	0.630319	0.676767	0.675858	0.608499	0.808529	0.568698	0.697403	0.700326	0.67423	0.628751	0.756407	0.758037	0.717141	0.664114	0.864193	0.554071	0.590007	0.633595	0.585127	0.602363	0.696853	0.699302	0.714616	0.867946	0.587456	0.573276	0.795423	0.676858	0.65971	0.613368	0.867323	0.643572
cg02265177	0.140852	0.119217	0.130177	0.160377	0.169	0.214872	0.0190453	0.0487287	0.189147	0.216453	0.134475	0.253378	0.311918	0.0649551	0.275415	0.498915	0.156437	0.1553	0.0474812	0.0721507	0.0382031	0.371035	0.071373	0.0936135	0.136855	0.23295	0.0838459	0.315919	0.327443	0.189693	0.155136	0.513816	0.065507	0.0655776	0.0833842	0.0844281	0.0485866	0.163472	0.175179	0.264184	0.647738	0.0861089	0.088376	0.366311	0.0604623	0.0952096	0.111837	0.627076	0.133658
cg25545391	0.524562	0.53341	0.484503	0.604289	0.553815	0.586699	0.325002	0.40108	0.630661	0.597712	0.506923	0.530288	0.549937	0.386576	0.581716	0.760618	0.464174	0.542036	0.448652	0.481389	0.456537	0.67749	0.426994	0.563778	0.552864	0.597879	0.403667	0.84568	0.68325	0.577712	0.572475	0.905189	0.42059	0.521255	0.445776	0.459939	0.390223	0.600542	0.650874	0.573793	0.884319	0.536391	0.534928	0.728948	0.401077	0.539149	0.494784	0.900796	0.529344
cg16361867	0.77717	0.747251	0.7953	0.735873	0.763707	0.775216	0.802016	0.896553	0.784718	0.644031	0.747461	0.756897	0.744779	0.860604	0.766346	0.684605	0.854152	0.779069	0.764887	0.836487	0.802018	0.653878	0.780784	0.836782	0.742463	0.774799	0.853206	0.618862	0.684088	0.784521	0.689305	0.644013	0.831026	0.821965	0.812845	0.814132	0.712508	0.760741	0.74589	0.697434	0.520283	0.841562	0.809116	0.659429	0.780323	0.821195	0.758771	0.466246	0.834752
cg22625831	0.47037	0.425266	0.339743	0.520701	0.474768	0.528967	0.192867	0.446762	0.540093	0.469952	0.43861	0.567391	0.496893	0.470225	0.518813	0.669149	0.512914	0.623897	0.333202	0.407488	0.454201	0.706234	0.380608	0.492553	0.436051	0.486975	0.521975	0.406684	0.528107	0.485322	0.379849	0.534624	0.51259	0.348573	0.435381	0.428622	0.314717	0.460434	0.497054	0.553122	0.766365	0.467983	0.425285	0.628575	0.43339	0.509996	0.514257	0.655827	0.517861
cg14876117	0.614986	0.622546	0.608328	0.693558	0.645758	0.690346	0.388344	0.502655	0.677404	0.662682	0.597396	0.646665	0.671176	0.532023	0.641216	0.815856	0.515043	0.668228	0.524055	0.514788	0.579024	0.729716	0.467039	0.65978	0.632363	0.602316	0.553783	0.840856	0.71137	0.623483	0.522884	0.923715	0.623656	0.542894	0.642014	0.566398	0.496056	0.621861	0.704331	0.657068	0.940535	0.598269	0.639957	0.799219	0.546085	0.599353	0.582418	0.913672	0.625777
cg03241493	0.419107	0.343672	0.279781	0.417064	0.42736	0.446139	0.182133	0.387587	0.481538	0.455282	0.406854	0.456403	0.440035	0.407647	0.393486	0.502699	0.431508	0.471132	0.292044	0.374459	0.368178	0.548859	0.476248	0.488879	0.410362	0.374561	0.474455	0.366421	0.514218	0.467058	0.395102	0.455498	0.462766	0.345025	0.425516	0.426497	0.33323	0.415779	0.446849	0.430582	0.622637	0.437144	0.393669	0.533072	0.359455	0.434174	0.393629	0.523027	0.428006
cg07659535	0.404021	0.284181	0.26074	0.385707	0.412631	0.430744	0.158429	0.240344	0.448434	0.423116	0.367661	0.43179	0.445325	0.284906	0.499257	0.480171	0.452197	0.510385	0.226389	0.298279	0.240882	0.568253	0.321691	0.388347	0.34224	0.318153	0.447185	0.327414	0.494797	0.399629	0.34194	0.461137	0.239	0.237095	0.320543	0.279024	0.202665	0.359427	0.444692	0.452927	0.69092	0.295185	0.389364	0.563593	0.265966	0.389385	0.344248	0.612484	0.483124
cg15956720	0.294398	0.222851	0.183805	0.292053	0.271888	0.320384	0.0936126	0.222307	0.354391	0.298935	0.261911	0.288523	0.25184	0.262836	0.339816	0.245889	0.309589	0.389087	0.213607	0.223386	0.204115	0.39005	0.222881	0.299742	0.270545	0.230123	0.324745	0.324026	0.404307	0.269101	0.270643	0.369136	0.165564	0.159613	0.198832	0.185213	0.158695	0.280512	0.311191	0.281543	0.501563	0.197107	0.242631	0.417756	0.34242	0.250389	0.272161	0.485671	0.285603
cg01418188	0.51465	0.351822	0.335819	0.448025	0.545395	0.495216	0.228389	0.422842	0.547559	0.524562	0.455597	0.477849	0.511637	0.416788	0.452908	0.555667	0.407424	0.590513	0.3417	0.371273	0.355351	0.641511	0.410388	0.534845	0.468147	0.365415	0.504836	0.463209	0.590926	0.522881	0.450179	0.617152	0.450339	0.385288	0.427715	0.424434	0.313497	0.453162	0.516498	0.515093	0.724923	0.443632	0.434658	0.627987	0.413599	0.447085	0.51883	0.676781	0.472504
cg09205945	0.499268	0.45972	0.319997	0.541864	0.569983	0.556202	0.14075	0.356373	0.579077	0.538581	0.473085	0.565988	0.550559	0.477274	0.514076	0.616204	0.632064	0.672419	0.301873	0.409101	0.444695	0.817629	0.446743	0.570496	0.423494	0.428337	0.543403	0.419235	0.58538	0.540506	0.424376	0.532345	0.497942	0.332743	0.447804	0.50145	0.314165	0.492791	0.560532	0.509921	0.837911	0.501074	0.460611	0.688573	0.355248	0.515652	0.516494	0.710432	0.497541
cg05116792	0.487276	0.494707	0.361576	0.532665	0.539864	0.562082	0.183374	0.492438	0.600753	0.549352	0.497164	0.567379	0.559368	0.486806	0.532522	0.784103	0.579969	0.635069	0.332572	0.418738	0.461624	0.743024	0.502719	0.585585	0.518524	0.421566	0.551825	0.439854	0.610348	0.559874	0.430283	0.521438	0.566293	0.400353	0.502049	0.509062	0.370685	0.504262	0.529237	0.56934	0.744653	0.550068	0.498443	0.676951	0.439472	0.541551	0.530701	0.687167	0.565375
cg25662857	0.542811	0.650025	0.635428	0.542666	0.536721	0.582837	0.736531	0.583894	0.56735	0.570982	0.611477	0.56783	0.614032	0.607626	0.573868	0.376885	0.656166	0.503444	0.6782	0.595414	0.577589	0.389834	0.590725	0.60686	0.581079	0.631437	0.573801	0.555543	0.554218	0.601246	0.689726	0.480321	0.570289	0.637638	0.607835	0.640714	0.661466	0.641492	0.561231	0.529354	0.397466	0.546412	0.523057	0.459927	0.64195	0.570723	0.553562	0.426451	0.577172
cg05777536	0.329527	0.398068	0.267678	0.471151	0.472713	0.391321	0.155147	0.380198	0.373476	0.348518	0.314969	0.427479	0.266116	0.366225	0.404374	0.650389	0.406954	0.528027	0.201756	0.295284	0.415791	0.598106	0.38157	0.450473	0.359396	0.343599	0.417164	0.335039	0.417791	0.459938	0.293615	0.604418	0.490913	0.24864	0.324823	0.410675	0.268424	0.316808	0.404034	0.484096	0.785239	0.323105	0.327253	0.567346	0.320037	0.458942	0.391992	0.698589	0.415481
cg02844688	0.769579	0.712518	0.725033	0.721015	0.767062	0.851079	0.507055	0.650963	0.889413	0.843994	0.751571	0.802582	0.856433	0.675669	0.811597	0.940438	0.712734	0.711119	0.772473	0.734558	0.545817	0.860893	0.66795	0.712418	0.837806	0.87128	0.724169	0.915749	0.907939	0.864939	0.722594	0.920437	0.51906	0.596558	0.741482	0.671875	0.598832	0.723694	0.846541	0.737841	0.955731	0.637362	0.700153	0.888586	0.670225	0.747002	0.710511	0.934567	0.780915
cg25815543	0.84037	0.893079	0.892948	0.867613	0.8096	0.81903	0.918539	0.873037	0.864202	0.852071	0.854714	0.825562	0.841315	0.848001	0.820831	0.710123	0.855263	0.702822	0.885966	0.896751	0.9089	0.681457	0.834093	0.834758	0.835403	0.87217	0.872796	0.771179	0.786621	0.819848	0.841872	0.712752	0.895965	0.893106	0.853822	0.874019	0.888706	0.856585	0.828091	0.831948	0.588891	0.801746	0.830109	0.717859	0.84035	0.827192	0.835743	0.696926	0.823184
cg17432627	0.488827	0.410888	0.314438	0.448752	0.533551	0.537853	0.257967	0.425881	0.520758	0.525283	0.464997	0.528714	0.509816	0.455182	0.504838	0.589605	0.528139	0.61257	0.357135	0.40992	0.476273	0.676086	0.452327	0.49947	0.480059	0.486361	0.489742	0.442698	0.604041	0.523001	0.483826	0.485852	0.485771	0.379329	0.385461	0.459902	0.376102	0.479806	0.519952	0.476679	0.661993	0.553224	0.434843	0.593507	0.377252	0.532966	0.454706	0.67206	0.507799
cg14730192	0.450666	0.383432	0.270298	0.470331	0.453462	0.481742	0.189093	0.409643	0.536577	0.491153	0.423968	0.445884	0.557411	0.416192	0.459361	0.669178	0.504187	0.544063	0.351254	0.379137	0.358725	0.617603	0.476807	0.509722	0.459782	0.328484	0.506962	0.421534	0.560516	0.444074	0.460522	0.48645	0.488787	0.326506	0.409024	0.4325	0.368652	0.454428	0.502932	0.454493	0.644124	0.462916	0.421283	0.589839	0.402898	0.472077	0.489547	0.600231	0.486406
cg10123035	0.345219	0.24911	0.232307	0.332678	0.358247	0.399904	0.09509	0.182315	0.344907	0.327324	0.263578	0.404566	0.418377	0.301999	0.386833	0.447054	0.342904	0.458979	0.236618	0.257901	0.246628	0.430851	0.283646	0.440742	0.256111	0.269271	0.382978	0.330734	0.382264	0.319229	0.256653	0.441339	0.273361	0.255487	0.260391	0.272386	0.171997	0.298506	0.360222	0.358585	0.664364	0.215797	0.304839	0.540839	0.274554	0.293204	0.311346	0.655736	0.474466
cg22164720	0.353108	0.338842	0.247373	0.367911	0.417303	0.425856	0.141843	0.27003	0.421662	0.394607	0.289218	0.393713	0.488247	0.330379	0.429046	0.570522	0.401489	0.443094	0.273925	0.278535	0.283125	0.429052	0.356097	0.302575	0.299132	0.340102	0.418992	0.329602	0.413956	0.309454	0.299939	0.462132	0.365622	0.248649	0.309588	0.301051	0.262346	0.356	0.392987	0.335005	0.560459	0.331003	0.330382	0.489917	0.33443	0.372736	0.407491	0.599445	0.390721
cg08339105	0.171672	0.156611	0.14766	0.19176	0.193763	0.274526	0.0957533	0.12555	0.284844	0.238	0.169189	0.160159	0.274681	0.17116	0.25109	0.21222	0.180757	0.26085	0.149298	0.166572	0.0733149	0.193417	0.133991	0.128488	0.243447	0.173386	0.198623	0.150895	0.171631	0.232703	0.142782	0.380824	0.0894381	0.155734	0.0741756	0.138703	0.077068	0.20398	0.145348	0.15577	0.333109	0.138502	0.142868	0.277646	0.101637	0.0935633	0.136369	0.467842	0.163597
cg02735557	0.448568	0.405404	0.33686	0.456684	0.509941	0.510858	0.158027	0.40848	0.546384	0.509683	0.463722	0.536634	0.499145	0.413622	0.465135	0.702727	0.502113	0.588226	0.27392	0.388385	0.397569	0.672735	0.398263	0.484165	0.47357	0.331621	0.47615	0.392441	0.54633	0.49668	0.386309	0.480707	0.543601	0.377816	0.402859	0.477031	0.34274	0.437232	0.468564	0.520405	0.740142	0.524004	0.438302	0.60443	0.386728	0.496851	0.478132	0.663386	0.488564
cg13364154	0.483829	0.394818	0.31838	0.491866	0.533987	0.548579	0.158149	0.402376	0.57269	0.525031	0.430483	0.499543	0.544221	0.397048	0.511014	0.594896	0.583871	0.602923	0.329333	0.409987	0.382497	0.504577	0.526245	0.572791	0.41112	0.372807	0.515545	0.421927	0.586426	0.490948	0.411729	0.557007	0.458901	0.34383	0.442869	0.434552	0.318518	0.486624	0.513085	0.513431	0.776445	0.471872	0.469351	0.699485	0.359713	0.491586	0.506519	0.709476	0.525523
cg16177573	0.637236	0.7344	0.808999	0.74067	0.615846	0.628683	0.852259	0.671667	0.635839	0.636346	0.66262	0.613195	0.562194	0.67352	0.659664	0.435398	0.602044	0.564551	0.824507	0.69954	0.719332	0.375232	0.627326	0.681566	0.721581	0.580892	0.576999	0.661729	0.598294	0.608673	0.693678	0.604284	0.681291	0.764994	0.750973	0.765146	0.760444	0.642288	0.495048	0.608884	0.455209	0.59243	0.624713	0.471519	0.657908	0.556996	0.587183	0.456768	0.669206
cg24135615	0.81142	0.911455	0.88273	0.825386	0.849749	0.838308	0.92268	0.902401	0.818319	0.839201	0.861551	0.826516	0.836395	0.875119	0.817443	0.787352	0.84788	0.821172	0.893898	0.890278	0.892259	0.731786	0.902155	0.86592	0.871792	0.895702	0.825759	0.848957	0.825232	0.828558	0.897832	0.759188	0.907392	0.90273	0.865522	0.882855	0.93044	0.879792	0.817678	0.764926	0.638875	0.895076	0.853333	0.731563	0.850999	0.87654	0.820164	0.693632	0.810813
cg01177100	0.503386	0.467587	0.3978	0.551593	0.5161	0.561029	0.274688	0.465648	0.53339	0.558081	0.503833	0.522283	0.546396	0.4409	0.522697	0.669417	0.537243	0.574257	0.436751	0.438099	0.459809	0.649489	0.523633	0.523198	0.481077	0.558123	0.524949	0.513226	0.604181	0.568654	0.505558	0.60594	0.522978	0.458847	0.467745	0.542324	0.427875	0.515701	0.489008	0.54501	0.696371	0.484352	0.460355	0.622696	0.423314	0.531933	0.501019	0.670076	0.501824
cg10277044	0.595047	0.620739	0.434006	0.604925	0.736956	0.6169	0.300232	0.583354	0.712938	0.711608	0.588065	0.606851	0.635223	0.582529	0.553778	0.878255	0.706493	0.665943	0.372315	0.568019	0.524541	0.81414	0.679784	0.674105	0.609427	0.480904	0.646579	0.594325	0.696415	0.652461	0.527116	0.657073	0.707405	0.533371	0.562311	0.648788	0.464822	0.671531	0.756483	0.674099	0.897907	0.601742	0.679786	0.771314	0.48169	0.682622	0.642423	0.811355	0.664365
cg15920396	0.140027	0.166191	0.13033	0.149914	0.197223	0.195331	0.0539163	0.0923488	0.166398	0.165678	0.161115	0.198621	0.208574	0.111168	0.184236	0.195658	0.22942	0.202551	0.0982085	0.082075	0.155119	0.301725	0.115151	0.13993	0.110536	0.15952	0.148569	0.177834	0.184202	0.196455	0.152897	0.243302	0.132281	0.13366	0.122979	0.148432	0.0749048	0.164186	0.202802	0.213161	0.341743	0.120861	0.113039	0.268784	0.09053	0.114325	0.130778	0.322178	0.177196
cg10568813	0.669174	0.73264	0.78264	0.677865	0.643501	0.658733	0.836949	0.660245	0.627394	0.688935	0.717037	0.618683	0.660982	0.712005	0.630852	0.417108	0.57565	0.560411	0.839939	0.788579	0.812585	0.430449	0.663142	0.718327	0.720029	0.777112	0.642075	0.682831	0.586758	0.647927	0.727925	0.612829	0.718681	0.841576	0.698229	0.694528	0.789815	0.749915	0.640897	0.66479	0.44427	0.732057	0.689483	0.519792	0.704103	0.655451	0.637399	0.540027	0.673833
cg02768790	0.554361	0.617265	0.69525	0.533817	0.5411	0.507872	0.795489	0.580484	0.533528	0.552947	0.580209	0.507272	0.551061	0.61026	0.574827	0.324007	0.609392	0.434963	0.7017	0.631431	0.591253	0.314325	0.476882	0.511978	0.66296	0.649966	0.515516	0.615947	0.486797	0.541167	0.613031	0.550845	0.546267	0.702054	0.636599	0.587107	0.680125	0.595038	0.553331	0.46905	0.322441	0.516891	0.524085	0.382299	0.580548	0.54219	0.562346	0.402793	0.542051
cg05988548	0.485719	0.399876	0.357003	0.442379	0.530959	0.499909	0.28826	0.441274	0.523399	0.511787	0.467113	0.475251	0.503629	0.470455	0.503459	0.558064	0.483639	0.558279	0.37434	0.438627	0.332838	0.609112	0.443547	0.497506	0.40733	0.454544	0.540045	0.397217	0.536236	0.509357	0.454837	0.582263	0.416187	0.381803	0.440151	0.468599	0.344355	0.509194	0.590084	0.511005	0.703802	0.429664	0.43535	0.629955	0.457344	0.484774	0.52172	0.673225	0.539017
cg02871300	0.450419	0.349673	0.29687	0.464622	0.468394	0.500616	0.118982	0.375469	0.494953	0.481546	0.413173	0.473341	0.483172	0.375751	0.525901	0.673151	0.526057	0.555748	0.288946	0.331509	0.346737	0.67689	0.374568	0.530828	0.407693	0.338468	0.487558	0.40336	0.550121	0.449119	0.372018	0.496204	0.436782	0.33973	0.402887	0.433264	0.255097	0.421195	0.457856	0.515444	0.724747	0.443422	0.361222	0.632159	0.343581	0.42026	0.476962	0.655865	0.412067
cg10535725	0.522135	0.462018	0.365203	0.510162	0.583872	0.526301	0.331578	0.468728	0.574663	0.522488	0.497993	0.526068	0.579506	0.505043	0.513201	0.627027	0.556525	0.653644	0.402135	0.500684	0.425726	0.693317	0.567928	0.54175	0.56606	0.393966	0.572261	0.465088	0.544205	0.604778	0.455566	0.574091	0.567061	0.451628	0.538795	0.534603	0.450839	0.530356	0.594156	0.552586	0.721005	0.501713	0.54255	0.658447	0.460754	0.57113	0.522741	0.685972	0.600003
cg22774340	0.793077	0.636094	0.751044	0.799427	0.837091	0.697315	0.339149	0.678362	0.740512	0.754631	0.611335	0.801453	0.829184	0.643631	0.731963	0.833506	0.800881	0.779788	0.523423	0.78664	0.747773	0.903104	0.63981	0.693065	0.749045	0.829915	0.641838	0.898578	0.775885	0.634438	0.738547	0.914998	0.722321	0.59624	0.801984	0.766978	0.79707	0.659013	0.755983	0.628905	0.950645	0.835354	0.675724	0.902544	0.642023	0.752636	0.861079	0.93322	0.746249
cg04936213	0.565377	0.458621	0.358669	0.50907	0.650484	0.550631	0.235218	0.47377	0.630212	0.584234	0.516501	0.517555	0.573234	0.505536	0.543013	0.89502	0.628716	0.659489	0.3083	0.492766	0.42257	0.843196	0.512694	0.519942	0.465569	0.654262	0.548525	0.254662	0.623366	0.555647	0.526192	0.620223	0.648899	0.402237	0.551941	0.529781	0.402349	0.554506	0.703693	0.554702	0.783913	0.553345	0.555428	0.74036	0.429381	0.592083	0.537317	0.742395	0.585372
cg04289454	0.193808	0.221938	0.186159	0.211714	0.252007	0.290261	0.149261	0.111599	0.194787	0.18859	0.185973	0.173413	0.179429	0.119793	0.150385	0.354381	0.262686	0.26522	0.0797606	0.104519	0.118889	0.156528	0.175585	0.16575	0.287106	0.0363048	0.120444	0.279445	0.183374	0.191007	0.143581	0.352909	0.196049	0.147983	0.154987	0.207621	0.0947882	0.169044	0.214312	0.125543	0.329023	0.267485	0.10295	0.266333	0.134094	0.159868	0.16524	0.43454	0.240599
cg16809865	0.531322	0.430976	0.371671	0.565925	0.586525	0.573798	0.178086	0.465091	0.613491	0.576972	0.498401	0.543476	0.537382	0.476249	0.561103	0.751205	0.494135	0.664892	0.310429	0.383124	0.472941	0.734139	0.435918	0.548062	0.495282	0.401176	0.570038	0.438815	0.595446	0.560576	0.409964	0.546381	0.519661	0.340512	0.447313	0.475679	0.333989	0.466566	0.50939	0.550481	0.791401	0.585037	0.481649	0.66408	0.444674	0.53335	0.521548	0.648722	0.574548
cg26804772	0.672683	0.549039	0.516731	0.532392	0.550081	0.624625	0.409147	0.368446	0.698905	0.672211	0.691895	0.710549	0.718856	0.586483	0.687367	0.715226	0.636452	0.655786	0.574829	0.714281	0.350871	0.723392	0.676447	0.5469	0.588917	0.757576	0.715602	0.625591	0.720881	0.60542	0.743127	0.635701	0.542565	0.522973	0.654438	0.477131	0.474001	0.823512	0.5643	0.712401	0.786775	0.527333	0.546374	0.726273	0.573603	0.589802	0.514891	0.838297	0.683437
cg03895671	0.399209	0.320227	0.260457	0.412602	0.421223	0.448209	0.150915	0.318765	0.471882	0.430396	0.366733	0.468443	0.478802	0.356103	0.468025	0.602866	0.360824	0.484863	0.256137	0.306125	0.313381	0.57392	0.307892	0.429645	0.397275	0.201484	0.438812	0.34169	0.499608	0.448617	0.343912	0.505137	0.407301	0.285333	0.335439	0.427674	0.257667	0.381946	0.383079	0.427265	0.66387	0.367361	0.350317	0.548751	0.351333	0.418004	0.452369	0.587621	0.421793
cg07487971	0.479785	0.453181	0.347856	0.519557	0.53557	0.569889	0.16591	0.456215	0.565834	0.537815	0.474258	0.531127	0.532873	0.427653	0.528098	0.785206	0.57074	0.613625	0.295757	0.387723	0.430453	0.763077	0.410479	0.566292	0.438695	0.469123	0.468478	0.422158	0.585595	0.525036	0.422886	0.549424	0.54249	0.353515	0.439047	0.469132	0.342964	0.44839	0.512261	0.522955	0.725976	0.532554	0.440133	0.661266	0.410044	0.536377	0.449068	0.708334	0.530336
cg08810238	0.381008	0.337339	0.351572	0.370223	0.443865	0.391685	0.269871	0.326492	0.426487	0.409105	0.376222	0.424236	0.432083	0.348891	0.440329	0.500751	0.387933	0.460297	0.396918	0.363795	0.248192	0.442065	0.300424	0.371316	0.344218	0.418919	0.327303	0.518154	0.496051	0.382609	0.341625	0.598725	0.279344	0.300324	0.355835	0.296507	0.2948	0.386794	0.447015	0.449984	0.61967	0.333861	0.314812	0.518503	0.377752	0.333665	0.379241	0.676019	0.502599
cg11136040	0.513319	0.481127	0.383474	0.527688	0.556356	0.557261	0.237808	0.375122	0.64078	0.57056	0.475434	0.579337	0.585923	0.484148	0.586162	0.779531	0.561772	0.702638	0.465783	0.408373	0.429252	0.76625	0.445012	0.589366	0.501656	0.407244	0.531894	0.492118	0.636532	0.5325	0.474715	0.552218	0.538327	0.361067	0.482565	0.502904	0.325457	0.527972	0.595258	0.594552	0.812208	0.524867	0.515897	0.710394	0.473078	0.55854	0.499952	0.723754	0.571908
cg13677162	0.489856	0.575597	0.582769	0.476043	0.473975	0.477464	0.634907	0.43036	0.545081	0.519421	0.583222	0.494184	0.454285	0.506605	0.490614	0.263756	0.489464	0.371005	0.651934	0.620536	0.585848	0.324528	0.505844	0.575317	0.495621	0.490249	0.463526	0.520708	0.484866	0.439941	0.556444	0.461641	0.501516	0.653054	0.619912	0.554678	0.620976	0.547455	0.537481	0.447208	0.270953	0.443151	0.417637	0.362744	0.373426	0.454751	0.507089	0.370509	0.451915
cg15162876	0.677118	0.64737	0.620744	0.62672	0.663977	0.611985	0.702898	0.686601	0.646204	0.617372	0.70929	0.630469	0.618328	0.689542	0.642097	0.501508	0.662224	0.677262	0.7991	0.6828	0.592073	0.492404	0.707304	0.628439	0.743136	0.629776	0.720059	0.531635	0.642944	0.654935	0.734315	0.438934	0.616894	0.718217	0.664869	0.671243	0.717364	0.658662	0.652834	0.619746	0.385596	0.585762	0.601729	0.513135	0.691598	0.640727	0.668908	0.474368	0.643145
cg17837191	0.502014	0.495538	0.359925	0.55042	0.558053	0.58972	0.213439	0.478883	0.586955	0.577728	0.505104	0.595246	0.565545	0.467964	0.484827	0.731916	0.63948	0.624809	0.353877	0.389856	0.502856	0.73812	0.518578	0.557423	0.500704	0.504783	0.546532	0.52872	0.659138	0.565218	0.448192	0.679519	0.562842	0.376183	0.492633	0.485793	0.377996	0.522516	0.542479	0.538336	0.79797	0.527015	0.483117	0.720883	0.449011	0.55498	0.522775	0.787889	0.514918
cg11543559	0.532491	0.477794	0.403898	0.539134	0.552698	0.588882	0.184886	0.483662	0.616901	0.593866	0.535423	0.530596	0.581509	0.452897	0.578389	0.731973	0.60709	0.692788	0.315949	0.470748	0.477712	0.746917	0.582835	0.62582	0.498476	0.411723	0.58147	0.402205	0.598211	0.551947	0.464055	0.558477	0.544438	0.377341	0.449827	0.538485	0.363296	0.524468	0.527215	0.552017	0.780606	0.563938	0.444131	0.670457	0.446972	0.578404	0.537712	0.699344	0.564682
cg18108653	0.437725	0.333118	0.361951	0.459437	0.441654	0.441705	0.308456	0.379788	0.455645	0.392662	0.32163	0.484582	0.422567	0.405965	0.489842	0.318939	0.375615	0.523125	0.464336	0.439801	0.299064	0.394434	0.358385	0.306293	0.419759	0.404149	0.395759	0.387064	0.47935	0.328233	0.381446	0.532407	0.317418	0.352448	0.434209	0.345314	0.344502	0.34941	0.429008	0.467678	0.717402	0.367321	0.313971	0.584083	0.425765	0.43992	0.468198	0.638478	0.499854
cg19816586	0.772772	0.76854	0.811007	0.733194	0.722983	0.762371	0.895744	0.737586	0.690765	0.766721	0.781735	0.722384	0.614092	0.83369	0.796945	0.474359	0.740374	0.767319	0.851234	0.794661	0.802581	0.587202	0.679023	0.780862	0.761826	0.72804	0.806939	0.659733	0.78162	0.717961	0.809136	0.722777	0.792031	0.791043	0.798658	0.776355	0.844972	0.707826	0.75554	0.703453	0.575587	0.727176	0.801641	0.646643	0.804977	0.748341	0.780095	0.540846	0.733111
cg18325866	0.521616	0.520615	0.573805	0.527853	0.608209	0.52112	0.203598	0.414277	0.601969	0.553425	0.501435	0.568375	0.636616	0.543468	0.607126	0.726132	0.607857	0.641012	0.401637	0.517001	0.393907	0.659922	0.440701	0.544095	0.523646	0.562916	0.581461	0.517288	0.592023	0.545936	0.457555	0.712248	0.487294	0.448624	0.549911	0.53185	0.334383	0.563482	0.564116	0.588035	0.789152	0.476001	0.504606	0.709357	0.448978	0.524907	0.618682	0.812948	0.580985
cg14378231	0.570865	0.527075	0.370523	0.531971	0.674108	0.595135	0.241012	0.536217	0.67982	0.628086	0.548359	0.593868	0.583651	0.566165	0.622589	0.752332	0.636599	0.691158	0.434342	0.594839	0.527042	0.77126	0.626109	0.588292	0.570025	0.578389	0.647442	0.469321	0.65681	0.611571	0.532918	0.609159	0.64692	0.474638	0.591818	0.601678	0.44427	0.605607	0.723181	0.593058	0.818737	0.594851	0.611564	0.761254	0.488591	0.631125	0.588461	0.706384	0.624581
cg16390109	0.720086	0.772003	0.813663	0.696238	0.695995	0.683398	0.838479	0.739362	0.709634	0.738528	0.746507	0.694298	0.811536	0.741236	0.726669	0.453189	0.728095	0.620223	0.895318	0.857654	0.72422	0.468832	0.698308	0.711243	0.755171	0.737414	0.714509	0.724147	0.671337	0.716966	0.782172	0.658819	0.671616	0.815034	0.822379	0.745886	0.813802	0.778755	0.727273	0.683183	0.526429	0.671651	0.625518	0.601663	0.789369	0.712609	0.673627	0.552567	0.701655
cg15274466	0.162832	0.324252	0.247574	0.267097	0.189904	0.279446	0.103516	0.163807	0.196972	0.213696	0.258876	0.226348	0.227018	0.244394	0.347542	0.385881	0.364882	0.30247	0.105531	0.148317	0.203605	0.323382	0.132655	0.213148	0.23302	0.19081	0.204157	0.291213	0.217635	0.315057	0.241543	0.522191	0.191258	0.135785	0.13798	0.150379	0.126608	0.292534	0.222854	0.281765	0.375725	0.260303	0.178033	0.287891	0.196131	0.29104	0.220805	0.408162	0.210663
cg08064068	0.528016	0.580894	0.470638	0.601267	0.56436	0.613152	0.334042	0.522317	0.656322	0.637331	0.526825	0.600765	0.574835	0.506565	0.61458	0.784996	0.568665	0.668695	0.393369	0.485663	0.508483	0.775796	0.454693	0.597639	0.52505	0.558156	0.569153	0.452342	0.644231	0.54855	0.527019	0.698672	0.63944	0.432404	0.530822	0.592738	0.393164	0.553061	0.546756	0.625314	0.793543	0.548273	0.569446	0.714113	0.508828	0.626661	0.602261	0.743665	0.550269
cg01919999	0.335577	0.195604	0.195702	0.240391	0.319818	0.299269	0.112033	0.207193	0.390634	0.315675	0.273045	0.327585	0.337389	0.241586	0.298726	0.329465	0.296594	0.349398	0.267354	0.281839	0.177444	0.351325	0.30709	0.322875	0.296864	0.280924	0.337857	0.331613	0.402984	0.266593	0.244272	0.405218	0.193916	0.173173	0.22919	0.303405	0.159204	0.336609	0.406407	0.362417	0.492439	0.241838	0.267282	0.396374	0.303964	0.281678	0.291226	0.455544	0.351808
cg07329251	0.360336	0.251301	0.24136	0.337167	0.342596	0.423968	0.121644	0.334311	0.376862	0.365182	0.307504	0.352459	0.393272	0.301102	0.397924	0.446905	0.348103	0.430063	0.279627	0.29402	0.250552	0.461073	0.274585	0.397	0.33528	0.256042	0.366034	0.352283	0.432221	0.363163	0.316099	0.410768	0.315515	0.25911	0.354478	0.275966	0.259523	0.302169	0.356831	0.378023	0.54044	0.342925	0.291189	0.48974	0.279026	0.288126	0.336254	0.542457	0.363043
cg12391044	0.573474	0.644019	0.569078	0.646994	0.656145	0.728007	0.380463	0.531938	0.691463	0.68293	0.595352	0.596989	0.628312	0.480208	0.642106	0.800483	0.55573	0.600148	0.525598	0.581621	0.501086	0.800165	0.537196	0.677244	0.635754	0.609255	0.445344	0.908402	0.808352	0.619987	0.687737	0.906589	0.587585	0.480864	0.54275	0.537292	0.433795	0.632198	0.611821	0.561764	0.933593	0.552801	0.531222	0.811616	0.491037	0.52607	0.580954	0.903832	0.579103
cg12134894	0.336543	0.359851	0.272408	0.36689	0.426366	0.396529	0.112512	0.282	0.49719	0.446886	0.345879	0.482507	0.471261	0.320189	0.431788	0.55761	0.410849	0.467904	0.283618	0.269705	0.239698	0.596003	0.378329	0.363501	0.282087	0.386843	0.37212	0.368094	0.502219	0.30459	0.279386	0.499166	0.303112	0.271783	0.309143	0.324659	0.221455	0.397273	0.407808	0.484418	0.732035	0.323172	0.307276	0.60605	0.291659	0.360539	0.397274	0.684246	0.427888
cg15657100	0.770649	0.777587	0.819679	0.754152	0.748643	0.761979	0.860563	0.768145	0.751125	0.785269	0.843498	0.694267	0.693537	0.752009	0.727653	0.603548	0.690737	0.710648	0.851502	0.826729	0.815889	0.691814	0.724937	0.708063	0.799191	0.771654	0.745389	0.767714	0.728208	0.677698	0.814033	0.685566	0.779641	0.826115	0.819357	0.837031	0.841279	0.754062	0.711124	0.738296	0.600981	0.724425	0.685652	0.592534	0.72815	0.766152	0.764473	0.613161	0.759343
cg03288256	0.787765	0.768311	0.770976	0.751813	0.76902	0.771235	0.822773	0.795296	0.805879	0.784931	0.753599	0.749929	0.815917	0.801104	0.766903	0.609242	0.803096	0.667717	0.870519	0.836189	0.762503	0.728359	0.78066	0.727041	0.800159	0.847297	0.699232	0.789468	0.741483	0.756948	0.817184	0.632676	0.783303	0.809627	0.825982	0.798398	0.838278	0.829333	0.726468	0.736568	0.564353	0.74684	0.787995	0.570476	0.73855	0.760149	0.737242	0.600155	0.76213
cg20519328	0.657743	0.750478	0.71365	0.754622	0.746984	0.829817	0.528859	0.594712	0.756933	0.654109	0.655991	0.7059	0.801863	0.545006	0.728949	0.870562	0.77178	0.70889	0.579414	0.666858	0.572313	0.782033	0.679311	0.628659	0.733912	0.824789	0.561486	0.901846	0.811592	0.646289	0.530335	0.967174	0.711233	0.613711	0.700759	0.697914	0.629691	0.697547	0.728717	0.580318	0.966126	0.716013	0.643607	0.879922	0.615482	0.762463	0.737238	0.962394	0.685225
cg01498832	0.548835	0.45422	0.411224	0.467839	0.652634	0.544893	0.250096	0.450186	0.623683	0.569111	0.530025	0.515003	0.513443	0.524353	0.506814	0.663605	0.557604	0.659692	0.380543	0.46235	0.428472	0.668691	0.543445	0.551819	0.521244	0.457229	0.608112	0.516965	0.617896	0.546948	0.516006	0.662262	0.489527	0.439177	0.473848	0.534188	0.403613	0.59641	0.696559	0.570783	0.790314	0.552289	0.566719	0.705633	0.401566	0.590702	0.528077	0.757959	0.609817
cg18481322	0.419122	0.331834	0.287028	0.402117	0.455094	0.480714	0.118953	0.309102	0.5054	0.452255	0.375157	0.491531	0.451771	0.371857	0.473492	0.629829	0.490234	0.576191	0.266864	0.306557	0.307665	0.634186	0.366634	0.478809	0.38436	0.350218	0.425857	0.344333	0.527688	0.396265	0.363415	0.469864	0.380206	0.340584	0.340668	0.37374	0.231498	0.379594	0.455028	0.480214	0.704439	0.386391	0.380744	0.581075	0.351192	0.414709	0.405565	0.616625	0.437993
cg18484136	0.38792	0.432679	0.461941	0.385703	0.29714	0.360655	0.508653	0.411504	0.386963	0.341984	0.41431	0.448849	0.337073	0.47586	0.420112	0.222191	0.517429	0.475847	0.536636	0.418175	0.484603	0.158121	0.43069	0.399879	0.374725	0.520045	0.47493	0.213045	0.213816	0.431844	0.451322	0.258144	0.466467	0.557186	0.38149	0.48235	0.569199	0.363575	0.331513	0.356234	0.148045	0.427502	0.360561	0.226381	0.338532	0.368516	0.465635	0.112188	0.281506
cg16739092	0.16732	0.30394	0.196037	0.177151	0.243059	0.222961	0.130988	0.171185	0.225643	0.193499	0.19466	0.263461	0.239551	0.189302	0.259838	0.254117	0.180149	0.235326	0.183844	0.17464	0.172641	0.249468	0.140223	0.229408	0.249714	0.245718	0.237516	0.340871	0.296974	0.207973	0.2265	0.490039	0.176449	0.169369	0.205549	0.190821	0.199209	0.258929	0.321488	0.24121	0.402514	0.177024	0.172998	0.340145	0.396165	0.134579	0.219311	0.312926	0.232636
cg07093259	0.386052	0.331574	0.227422	0.358448	0.52531	0.453019	0.128656	0.293663	0.471481	0.456807	0.404705	0.484129	0.484388	0.349276	0.448389	0.659742	0.44163	0.483116	0.204351	0.393029	0.266395	0.581547	0.394332	0.426891	0.302472	0.389994	0.432606	0.346662	0.502044	0.411011	0.354492	0.531922	0.358533	0.270804	0.341463	0.338038	0.236459	0.399725	0.471487	0.434285	0.767037	0.365173	0.349366	0.57153	0.368969	0.361143	0.38827	0.669663	0.480173
cg13417066	0.63067	0.738968	0.64377	0.723391	0.733812	0.68693	0.593293	0.535874	0.56593	0.777587	0.638444	0.710669	0.689643	0.643925	0.804726	0.709484	0.674692	0.725846	0.680809	0.78221	0.488369	0.794288	0.742277	0.535414	0.730439	0.682634	0.631017	0.860781	0.761728	0.630287	0.758921	0.797336	0.477339	0.418667	0.628223	0.534767	0.638041	0.585374	0.773844	0.710164	0.864741	0.753733	0.694525	0.747755	0.696441	0.740193	0.643007	0.811147	0.568398
cg00336149	0.467075	0.417642	0.445765	0.563565	0.352587	0.477976	0.391894	0.672611	0.559711	0.418351	0.469663	0.460931	0.518086	0.416662	0.402018	0.707821	0.493632	0.481276	0.21595	0.444226	0.464245	0.552626	0.375071	0.478447	0.491169	0.366937	0.429488	0.612438	0.594067	0.583726	0.434785	0.607838	0.487147	0.458437	0.435672	0.493401	0.47345	0.584986	0.542588	0.279944	0.688047	0.584674	0.340272	0.588072	0.469708	0.543832	0.443782	0.723368	0.456569
cg06289802	0.449054	0.365649	0.3512	0.423856	0.463516	0.497652	0.190041	0.350019	0.507239	0.452869	0.403731	0.482301	0.472169	0.395873	0.435384	0.523578	0.455468	0.526175	0.359691	0.354887	0.34803	0.615164	0.485521	0.474487	0.432738	0.376524	0.458259	0.437853	0.530594	0.483522	0.401366	0.527413	0.415871	0.3828	0.400547	0.454056	0.316806	0.437417	0.435214	0.46897	0.710488	0.409023	0.418659	0.654221	0.373474	0.476525	0.474124	0.656424	0.438282
cg04329112	0.59761	0.575052	0.478362	0.597949	0.680289	0.621846	0.365803	0.54918	0.694361	0.652451	0.617502	0.621125	0.599652	0.563779	0.609949	0.782896	0.617797	0.691341	0.450627	0.549889	0.503925	0.779903	0.611588	0.652782	0.616208	0.51522	0.61197	0.608941	0.685782	0.622499	0.612679	0.696285	0.575366	0.541303	0.558375	0.606148	0.486352	0.615458	0.710364	0.613455	0.814949	0.631117	0.601405	0.760092	0.466344	0.668464	0.631532	0.753573	0.707183
cg19080979	0.455459	0.380838	0.334529	0.462077	0.444457	0.487638	0.206345	0.433007	0.48859	0.48791	0.435332	0.491356	0.485697	0.416972	0.475967	0.595815	0.490145	0.54101	0.350711	0.399944	0.391099	0.573938	0.418503	0.479693	0.422147	0.514239	0.48563	0.437264	0.502983	0.499913	0.42758	0.511395	0.46272	0.356592	0.484083	0.451185	0.359923	0.43835	0.447064	0.483813	0.638716	0.478301	0.411017	0.566804	0.386433	0.470124	0.445336	0.586324	0.480828
cg09884635	0.788969	0.870648	0.814897	0.837605	0.795329	0.830355	0.853115	0.854745	0.845794	0.782333	0.825644	0.809653	0.732108	0.859948	0.802874	0.643254	0.849924	0.85083	0.841215	0.862067	0.924454	0.716889	0.874312	0.850374	0.806188	0.833177	0.854005	0.529569	0.680901	0.810942	0.745216	0.563112	0.899893	0.902552	0.826073	0.917689	0.861518	0.797388	0.794996	0.774451	0.554472	0.87804	0.83227	0.696566	0.788782	0.846256	0.834268	0.612292	0.868302
cg01167335	0.525674	0.428403	0.362029	0.525364	0.575117	0.542702	0.146857	0.469784	0.613013	0.556595	0.463194	0.566161	0.571687	0.46601	0.48115	0.715168	0.528456	0.675377	0.334958	0.405548	0.376064	0.742143	0.437387	0.501646	0.484864	0.445787	0.524113	0.488444	0.629049	0.590082	0.410956	0.550557	0.488576	0.37898	0.385855	0.482247	0.328114	0.505106	0.624895	0.60868	0.762925	0.500953	0.456873	0.692133	0.361244	0.546469	0.502407	0.722386	0.581264
cg22013864	0.516736	0.439816	0.338629	0.477153	0.589763	0.507395	0.177415	0.457527	0.595149	0.563223	0.460512	0.56107	0.520311	0.467149	0.461915	0.714742	0.515371	0.586285	0.329932	0.427588	0.46195	0.737116	0.507076	0.569998	0.499142	0.451643	0.549361	0.419907	0.587006	0.55786	0.475849	0.579864	0.585181	0.401197	0.45984	0.507097	0.369317	0.536228	0.640782	0.498222	0.739371	0.529311	0.505107	0.655075	0.423067	0.54583	0.479407	0.653677	0.544826
cg09076123	0.301325	0.155734	0.156612	0.224995	0.257615	0.308963	0.0627965	0.166026	0.309451	0.272005	0.213555	0.279316	0.30483	0.251564	0.30964	0.259958	0.240239	0.365187	0.186726	0.200322	0.151869	0.38026	0.217557	0.24394	0.236134	0.208028	0.312865	0.289748	0.334557	0.262954	0.240479	0.349218	0.186104	0.205287	0.254413	0.205309	0.136362	0.243767	0.292161	0.311972	0.517941	0.222687	0.229135	0.406365	0.211435	0.244008	0.271175	0.435921	0.271715
cg08929980	0.483888	0.434588	0.373586	0.542148	0.525981	0.534777	0.162514	0.433738	0.615415	0.532378	0.510428	0.56101	0.52795	0.425159	0.540168	0.649153	0.539026	0.582517	0.365149	0.371806	0.434867	0.693051	0.454641	0.472154	0.495488	0.472485	0.501339	0.442809	0.636561	0.503224	0.506098	0.529983	0.462773	0.345316	0.44923	0.466738	0.334381	0.446144	0.463866	0.54368	0.736358	0.474974	0.481841	0.655712	0.354504	0.525024	0.424279	0.724064	0.491041
cg14623715	0.585524	0.802188	0.676434	0.703218	0.673773	0.692749	0.693136	0.7423	0.672629	0.726131	0.724901	0.711472	0.68105	0.709359	0.623462	0.670654	0.688116	0.687716	0.709123	0.701878	0.675204	0.672736	0.637161	0.613277	0.747008	0.743493	0.676	0.453258	0.663087	0.655254	0.737132	0.378111	0.734221	0.650667	0.772397	0.73507	0.799256	0.639728	0.549935	0.713799	0.330428	0.718863	0.5881	0.531419	0.704575	0.739963	0.6344	0.319538	0.631025
cg27070405	0.358537	0.244984	0.267007	0.341514	0.33697	0.397926	0.0975363	0.261406	0.428567	0.360195	0.298651	0.460366	0.3185	0.282347	0.387283	0.621662	0.387543	0.430614	0.213491	0.207335	0.254973	0.500905	0.352415	0.404693	0.356464	0.252157	0.348545	0.403727	0.490592	0.323208	0.26883	0.473094	0.314841	0.22993	0.268451	0.257199	0.162961	0.262565	0.386754	0.34953	0.628858	0.341576	0.313578	0.499837	0.243881	0.277465	0.350211	0.576545	0.336595
cg17679987	0.632237	0.671218	0.704833	0.627833	0.637042	0.58234	0.752007	0.632623	0.636939	0.655537	0.651271	0.598963	0.609168	0.675838	0.583809	0.473375	0.61335	0.531278	0.796441	0.713028	0.618238	0.484595	0.62072	0.5922	0.722329	0.632692	0.619776	0.659088	0.595899	0.642239	0.662428	0.598899	0.61269	0.755905	0.692383	0.621684	0.77078	0.627043	0.626559	0.592595	0.395258	0.561733	0.609841	0.502785	0.70569	0.628108	0.613982	0.473231	0.644951
cg26599972	0.552817	0.574395	0.639393	0.563058	0.506649	0.53407	0.614753	0.646416	0.53307	0.573207	0.610396	0.45021	0.472209	0.618664	0.522269	0.581701	0.536993	0.552703	0.539884	0.648446	0.637027	0.50523	0.530214	0.541168	0.697712	0.424386	0.487092	0.538525	0.498733	0.539743	0.607602	0.524351	0.622856	0.602817	0.64016	0.594728	0.713109	0.537759	0.4081	0.473615	0.413907	0.663194	0.562411	0.461639	0.493258	0.592721	0.567024	0.432438	0.507972
cg10650269	0.484651	0.429436	0.339749	0.441345	0.563194	0.493695	0.230067	0.410605	0.568087	0.544064	0.45682	0.504377	0.502518	0.459963	0.474136	0.662762	0.488739	0.539136	0.322599	0.422416	0.412396	0.673282	0.442299	0.514902	0.487017	0.421996	0.501306	0.458932	0.591222	0.505487	0.44951	0.555743	0.513744	0.412567	0.451815	0.498415	0.366483	0.511413	0.569893	0.48814	0.726962	0.468586	0.44471	0.630755	0.381682	0.509651	0.473868	0.637475	0.525807
cg07068664	0.749775	0.714979	0.797407	0.717814	0.72421	0.637223	0.858997	0.736738	0.735747	0.752283	0.696626	0.738635	0.767697	0.757593	0.680751	0.519669	0.614928	0.615697	0.80476	0.827861	0.78739	0.50238	0.687978	0.658048	0.768695	0.627677	0.675737	0.649677	0.643264	0.718048	0.719159	0.583245	0.797847	0.772082	0.778811	0.782252	0.840668	0.732102	0.748563	0.624348	0.550424	0.707367	0.615324	0.567879	0.737306	0.696322	0.617135	0.576185	0.673145
cg27336113	0.607317	0.58535	0.517774	0.609332	0.652251	0.609164	0.445575	0.632271	0.676786	0.638066	0.685121	0.661534	0.636568	0.638736	0.635591	0.602618	0.727846	0.720779	0.529689	0.626465	0.469634	0.761898	0.618125	0.611264	0.629793	0.583124	0.656725	0.566522	0.671727	0.654774	0.623758	0.658411	0.596532	0.545223	0.599464	0.584388	0.503801	0.646275	0.730742	0.649442	0.796952	0.653128	0.630845	0.758065	0.560879	0.677837	0.676563	0.749475	0.721666
cg13087903	0.452521	0.416266	0.34162	0.472209	0.478886	0.508263	0.264562	0.415341	0.492442	0.499554	0.453489	0.490979	0.498779	0.433258	0.432588	0.594536	0.475627	0.508754	0.332576	0.36723	0.399853	0.594944	0.476093	0.527553	0.467457	0.368565	0.487278	0.431832	0.533264	0.496104	0.430095	0.516398	0.495842	0.389777	0.440864	0.454354	0.364514	0.433848	0.440958	0.478233	0.627039	0.463056	0.422146	0.575423	0.394189	0.475392	0.459845	0.595773	0.448637
cg12528283	0.4639	0.388556	0.349144	0.454251	0.492039	0.492121	0.208588	0.38563	0.534656	0.495981	0.441439	0.5027	0.486197	0.407075	0.476207	0.662948	0.523989	0.541685	0.311777	0.431298	0.369813	0.604663	0.438334	0.445901	0.422001	0.524524	0.494193	0.42679	0.550302	0.484749	0.401822	0.525493	0.380587	0.394013	0.411063	0.437821	0.33415	0.430038	0.438353	0.454306	0.670333	0.46054	0.40811	0.591188	0.391652	0.501828	0.460722	0.645891	0.47127
cg13537752	0.420426	0.486786	0.351906	0.487943	0.535295	0.544852	0.250145	0.382246	0.544984	0.59196	0.478515	0.508824	0.46679	0.388106	0.535451	0.692568	0.40563	0.501125	0.364396	0.328578	0.390016	0.711416	0.400237	0.698779	0.406649	0.437477	0.414878	0.644942	0.544288	0.541678	0.449039	0.769936	0.441668	0.368188	0.393922	0.390725	0.361743	0.459072	0.492405	0.524291	0.802877	0.457269	0.467299	0.616098	0.409713	0.48363	0.453698	0.792681	0.460022
cg25969122	0.12909	0.13969	0.151851	0.148478	0.192279	0.175634	0.052233	0.0792272	0.101802	0.21317	0.146216	0.120412	0.19317	0.0643025	0.195572	0.340534	0.0854398	0.095224	0.0731914	0.0482984	0.0711433	0.319399	0.0665668	0.0942744	0.155663	0.18911	0.0541489	0.378067	0.321785	0.22911	0.178779	0.516892	0.110761	0.0720776	0.0706969	0.100241	0.0629023	0.163492	0.150598	0.222165	0.587754	0.0769379	0.0847952	0.294676	0.0569233	0.130979	0.111768	0.57253	0.0966942
cg01137047	0.574959	0.521237	0.457622	0.566951	0.616595	0.613454	0.283436	0.445995	0.631605	0.621468	0.473638	0.569806	0.534207	0.558193	0.538265	0.729734	0.552194	0.616466	0.400282	0.435439	0.461817	0.736589	0.542837	0.581266	0.560052	0.439585	0.538744	0.646862	0.633487	0.560037	0.535665	0.788474	0.520066	0.449962	0.515664	0.542288	0.403473	0.581978	0.618649	0.554654	0.77667	0.61315	0.56745	0.696519	0.379105	0.538251	0.620976	0.788522	0.5408
cg10805896	0.587011	0.563366	0.39534	0.620986	0.696597	0.570625	0.382557	0.502789	0.725379	0.609709	0.593096	0.577461	0.615649	0.581971	0.587923	0.75064	0.61127	0.654434	0.391256	0.564546	0.481701	0.752506	0.584869	0.594818	0.524111	0.629312	0.629144	0.661737	0.711023	0.533624	0.614228	0.694435	0.619511	0.424708	0.525849	0.49599	0.536229	0.663978	0.619106	0.573045	0.808573	0.512534	0.620445	0.715197	0.444433	0.734028	0.503626	0.722808	0.624401
cg14574315	0.272156	0.23354	0.291901	0.272027	0.300986	0.286159	0.242712	0.271947	0.301721	0.306065	0.308011	0.275227	0.228474	0.207185	0.297242	0.239861	0.213102	0.280338	0.242503	0.219605	0.257076	0.230369	0.188514	0.252193	0.261017	0.207572	0.217319	0.463997	0.325799	0.241539	0.304204	0.51672	0.20336	0.252688	0.215669	0.180266	0.233328	0.27122	0.335139	0.259968	0.576964	0.203329	0.23061	0.405046	0.238426	0.211249	0.284223	0.599031	0.295598
cg25126728	0.536698	0.610693	0.659506	0.505866	0.536079	0.533053	0.774087	0.581489	0.499566	0.504081	0.58714	0.508573	0.628489	0.582797	0.559465	0.219432	0.611417	0.47421	0.664099	0.621542	0.57282	0.318712	0.505774	0.512594	0.59631	0.635049	0.477192	0.565207	0.478439	0.513985	0.665099	0.536474	0.525239	0.627874	0.592014	0.581477	0.659207	0.595151	0.501324	0.51528	0.341486	0.517716	0.484943	0.396345	0.616884	0.521016	0.5329	0.445528	0.508828
cg10327881	0.469627	0.423256	0.311402	0.472755	0.589794	0.459415	0.265948	0.401473	0.534468	0.481242	0.44929	0.480137	0.446421	0.477711	0.476568	0.57893	0.572951	0.588525	0.356547	0.454465	0.366661	0.610939	0.513823	0.452562	0.444532	0.400564	0.486387	0.416771	0.509333	0.495441	0.403223	0.513067	0.4784	0.405048	0.422952	0.439866	0.344073	0.421037	0.543659	0.452713	0.670187	0.515625	0.522554	0.638163	0.41184	0.517598	0.558995	0.632078	0.560049
cg20050875	0.64309	0.68536	0.476733	0.666199	0.764101	0.699903	0.455318	0.65009	0.755335	0.738333	0.652486	0.689182	0.729631	0.627539	0.703861	0.895417	0.730748	0.783303	0.526564	0.595185	0.690626	0.86878	0.746434	0.721345	0.685028	0.52975	0.68467	0.66932	0.742731	0.732286	0.625402	0.777843	0.759938	0.551569	0.626708	0.659537	0.552614	0.723721	0.776599	0.68454	0.898383	0.681042	0.72074	0.805162	0.598342	0.704287	0.691483	0.84584	0.704785
cg12223839	0.438934	0.39675	0.305342	0.476665	0.494035	0.511859	0.139015	0.379912	0.542047	0.487685	0.4401	0.498462	0.483741	0.411795	0.47393	0.739086	0.46681	0.587338	0.271004	0.35926	0.389776	0.713706	0.428104	0.505233	0.421809	0.417487	0.478888	0.351318	0.512017	0.478511	0.366833	0.489141	0.454239	0.34467	0.38969	0.454445	0.285746	0.429056	0.451436	0.478971	0.72658	0.497691	0.424314	0.609625	0.37694	0.470561	0.430716	0.649189	0.485184
cg13107083	0.196076	0.128477	0.125489	0.161897	0.232836	0.176538	0.0738273	0.0951722	0.229354	0.193192	0.187384	0.217693	0.246151	0.137081	0.319654	0.21932	0.17642	0.298459	0.0864187	0.120547	0.0669481	0.277643	0.145515	0.195256	0.232163	0.0890794	0.202739	0.243369	0.249853	0.212125	0.18633	0.309415	0.0782883	0.0936307	0.110859	0.142456	0.0670465	0.222354	0.283452	0.278104	0.504745	0.119037	0.178026	0.337901	0.11644	0.180271	0.212233	0.435506	0.255802
cg05424831	0.780913	0.887281	0.834517	0.792132	0.836689	0.762926	0.924421	0.852013	0.767712	0.891886	0.898442	0.757695	0.855685	0.823529	0.921867	0.656814	0.846801	0.741037	0.939369	0.864054	0.901895	0.678438	0.778686	0.758059	0.8532	0.907694	0.753497	0.781875	0.723736	0.775671	0.853267	0.715318	0.820866	0.915232	0.812066	0.858041	0.912869	0.816753	0.839471	0.715583	0.503727	0.863784	0.715866	0.689637	0.853034	0.79573	0.796526	0.625461	0.818107
cg20757205	0.377454	0.305306	0.242188	0.392681	0.401808	0.41641	0.117423	0.316217	0.416757	0.398274	0.363661	0.373172	0.417227	0.318944	0.386166	0.518818	0.486156	0.480581	0.234191	0.290015	0.297283	0.543624	0.351163	0.43189	0.395666	0.256587	0.417846	0.3182	0.446576	0.390513	0.355554	0.423173	0.358616	0.3066	0.373885	0.402169	0.2414	0.352031	0.360102	0.405762	0.604538	0.381606	0.335192	0.523742	0.300435	0.37038	0.350229	0.521509	0.407259
cg16675872	0.803848	0.827055	0.864572	0.768655	0.761281	0.72686	0.899957	0.841678	0.826322	0.813719	0.828447	0.725232	0.815626	0.855679	0.729938	0.526089	0.827937	0.689673	0.900878	0.847957	0.863039	0.656086	0.798367	0.770082	0.807479	0.909638	0.778703	0.803001	0.710479	0.731027	0.831387	0.713872	0.802147	0.891632	0.818446	0.833	0.873973	0.871779	0.811839	0.741869	0.620169	0.761156	0.752929	0.658849	0.855446	0.773029	0.788194	0.665911	0.832099
cg15572436	0.160084	0.147381	0.157143	0.196092	0.221199	0.195016	0.0789849	0.107123	0.174253	0.224779	0.190913	0.152288	0.247856	0.116347	0.193592	0.342338	0.128221	0.131348	0.101692	0.0976561	0.133544	0.283561	0.0941565	0.156929	0.213615	0.187513	0.108357	0.409856	0.283789	0.237514	0.135723	0.459134	0.144286	0.122612	0.151932	0.156572	0.118068	0.148932	0.169775	0.168413	0.47566	0.125316	0.128507	0.28875	0.107308	0.143027	0.114281	0.494309	0.127883
cg27064337	0.252554	0.143068	0.152646	0.249878	0.209631	0.209913	0.071317	0.171117	0.257149	0.306927	0.241325	0.191771	0.183286	0.158188	0.244707	0.355137	0.233955	0.259353	0.121409	0.164544	0.15958	0.330546	0.149312	0.217328	0.232037	0.210348	0.227066	0.26189	0.235861	0.320879	0.196646	0.377246	0.237226	0.14228	0.168414	0.195706	0.124794	0.236591	0.234569	0.228197	0.507202	0.175022	0.167238	0.333531	0.116261	0.19652	0.176066	0.448255	0.250925
cg25357716	0.672733	0.734588	0.633073	0.683502	0.805234	0.737389	0.530523	0.665606	0.721052	0.822374	0.749434	0.6788	0.708517	0.646249	0.754699	0.936755	0.70749	0.773562	0.501527	0.580177	0.674349	0.880636	0.649189	0.691174	0.737866	0.784175	0.64776	0.802208	0.783236	0.757957	0.636647	0.852895	0.684784	0.684995	0.639422	0.708685	0.603321	0.731628	0.735007	0.728318	0.901445	0.758186	0.684546	0.865539	0.570962	0.735717	0.690857	0.912756	0.779949
cg14491800	0.684403	0.686655	0.606811	0.738543	0.647295	0.783088	0.439021	0.635963	0.750984	0.76656	0.707555	0.513085	0.587115	0.615296	0.729251	0.916154	0.665969	0.756788	0.637315	0.587832	0.627493	0.847634	0.577823	0.722585	0.700459	0.74383	0.627036	0.850438	0.894208	0.767142	0.814414	0.843245	0.58687	0.606795	0.614968	0.630349	0.571144	0.734566	0.74153	0.723898	0.927801	0.672498	0.722521	0.849147	0.652053	0.747843	0.676795	0.889478	0.713651
cg17542517	0.312563	0.236792	0.245993	0.278418	0.327908	0.314842	0.148501	0.250643	0.323798	0.345064	0.312448	0.307029	0.318358	0.250507	0.303208	0.389917	0.275357	0.317213	0.241025	0.266587	0.236174	0.37004	0.238993	0.295175	0.306873	0.348628	0.26485	0.529992	0.371472	0.353721	0.329114	0.554112	0.248942	0.258953	0.305458	0.30488	0.218479	0.310343	0.30563	0.287853	0.509001	0.268601	0.238716	0.385513	0.250462	0.276966	0.273425	0.563424	0.263154
cg12708109	0.686156	0.694146	0.748459	0.677803	0.625117	0.665462	0.797529	0.71126	0.623664	0.650661	0.690038	0.621619	0.626511	0.720905	0.690679	0.596689	0.621225	0.632471	0.79865	0.705033	0.71565	0.459703	0.701745	0.621096	0.759721	0.687025	0.63412	0.744688	0.588988	0.605306	0.641148	0.613375	0.681457	0.761854	0.732312	0.682621	0.742884	0.668089	0.663431	0.625243	0.457079	0.635913	0.643377	0.537438	0.701805	0.671518	0.689259	0.516124	0.674236
cg02719051	0.344688	0.381076	0.34138	0.37315	0.442068	0.403399	0.173124	0.341632	0.457155	0.459221	0.377466	0.36574	0.358487	0.343611	0.37423	0.565472	0.423136	0.410095	0.377149	0.308632	0.32226	0.519367	0.293094	0.31816	0.429781	0.325719	0.371142	0.39472	0.388678	0.315169	0.378707	0.572224	0.389429	0.276625	0.324795	0.300042	0.286482	0.345436	0.37745	0.376638	0.592293	0.382756	0.285822	0.465801	0.311983	0.348082	0.476106	0.619521	0.331196
cg19449917	0.497064	0.447318	0.478928	0.438626	0.464071	0.493401	0.453209	0.515725	0.428597	0.510074	0.453566	0.381205	0.373235	0.547442	0.403711	0.374119	0.466178	0.409384	0.590036	0.523941	0.465188	0.343867	0.53499	0.4879	0.533853	0.461729	0.547941	0.286834	0.4131	0.453117	0.514541	0.203358	0.58618	0.588215	0.515819	0.587791	0.590901	0.454586	0.385701	0.411577	0.183069	0.455468	0.36751	0.324028	0.515952	0.4443	0.414753	0.18461	0.392783
cg05913846	0.15088	0.182048	0.145955	0.16853	0.135239	0.178967	0.0605856	0.0947013	0.187117	0.243589	0.119897	0.388279	0.258985	0.129147	0.255003	0.457662	0.209458	0.190839	0.126766	0.0986374	0.0834867	0.308141	0.109631	0.117701	0.263287	0.17714	0.18	0.276992	0.115577	0.285406	0.103628	0.19321	0.22128	0.0970282	0.111531	0.208306	0.103822	0.414263	0.28393	0.202848	0.508226	0.12461	0.142104	0.284268	0.134724	0.142277	0.263969	0.513886	0.138711
cg17388328	0.420111	0.355076	0.270358	0.466697	0.414519	0.425046	0.205719	0.319427	0.473598	0.483007	0.420592	0.430471	0.381416	0.369856	0.421368	0.556956	0.392887	0.516445	0.308614	0.386144	0.304489	0.583535	0.37197	0.425092	0.41712	0.302299	0.391708	0.436333	0.474766	0.443208	0.378121	0.570946	0.464784	0.298841	0.400627	0.348264	0.325711	0.409491	0.488577	0.416876	0.634099	0.394494	0.33898	0.504208	0.28623	0.400351	0.391107	0.555501	0.426519
cg25389087	0.524254	0.507065	0.397298	0.542459	0.586251	0.55118	0.253364	0.507759	0.592748	0.582073	0.517384	0.526376	0.522582	0.519135	0.522598	0.698712	0.577256	0.717402	0.320156	0.439411	0.548237	0.778087	0.425142	0.625789	0.503026	0.289069	0.517975	0.36664	0.505476	0.526004	0.396553	0.545956	0.514037	0.356322	0.464337	0.50368	0.399271	0.531209	0.557983	0.592979	0.717001	0.618605	0.540089	0.653001	0.408594	0.609782	0.450216	0.619694	0.54298
cg21702188	0.368027	0.31393	0.253947	0.378742	0.379101	0.407592	0.135226	0.323551	0.416795	0.417647	0.372728	0.403676	0.438527	0.354877	0.34602	0.525148	0.453444	0.450083	0.243379	0.300468	0.343314	0.535777	0.363979	0.414575	0.366468	0.364525	0.42118	0.319354	0.452599	0.422148	0.329003	0.394739	0.389962	0.286475	0.354353	0.38682	0.267653	0.348934	0.364335	0.437778	0.586402	0.40307	0.343032	0.52168	0.326909	0.394845	0.355649	0.529509	0.373442
cg07960083	0.686161	0.75535	0.768863	0.710323	0.699587	0.618147	0.853761	0.739947	0.71567	0.70334	0.750449	0.698199	0.742263	0.730819	0.723667	0.730165	0.747976	0.580821	0.802953	0.81379	0.770368	0.538122	0.747567	0.716992	0.741647	0.713543	0.603271	0.709138	0.626065	0.717162	0.761957	0.652015	0.74017	0.752209	0.710423	0.762418	0.809662	0.716919	0.743172	0.62515	0.499747	0.76822	0.64666	0.567108	0.759704	0.690259	0.68408	0.595569	0.696717
cg11684902	0.381215	0.308863	0.29029	0.412186	0.374966	0.404324	0.120844	0.267966	0.389069	0.404789	0.34067	0.44284	0.422449	0.339116	0.424421	0.520806	0.408656	0.468847	0.255688	0.289492	0.332954	0.538418	0.358239	0.460402	0.363054	0.272062	0.429732	0.350264	0.435815	0.381408	0.335833	0.451666	0.419598	0.280666	0.3154	0.399817	0.237196	0.326788	0.405723	0.404882	0.66229	0.419334	0.374977	0.564079	0.301921	0.357217	0.384625	0.591623	0.379233
cg25563406	0.596133	0.53311	0.544658	0.585938	0.607576	0.618308	0.458242	0.523761	0.64556	0.632346	0.612415	0.650328	0.649343	0.541474	0.690032	0.659604	0.656776	0.691124	0.512805	0.597547	0.52086	0.704713	0.55026	0.592091	0.597675	0.546116	0.63321	0.629821	0.67362	0.583521	0.593967	0.711859	0.532055	0.499898	0.566913	0.55982	0.488179	0.590593	0.616549	0.658547	0.78862	0.527252	0.515105	0.741824	0.59115	0.618202	0.587622	0.804149	0.638733
cg27230882	0.469326	0.42476	0.292998	0.45362	0.556438	0.508884	0.159401	0.392534	0.548839	0.520463	0.439802	0.499866	0.549231	0.398387	0.497006	0.688818	0.510138	0.619024	0.313317	0.372806	0.410837	0.70856	0.527209	0.548328	0.442357	0.467802	0.53997	0.402979	0.59285	0.530493	0.428287	0.513794	0.508625	0.355948	0.414202	0.467494	0.332059	0.475328	0.551645	0.486156	0.746495	0.490311	0.445153	0.655244	0.354142	0.494436	0.473888	0.684463	0.513874
cg11557257	0.445335	0.453722	0.397799	0.470632	0.479684	0.521369	0.333164	0.381445	0.542343	0.499463	0.537472	0.537618	0.597546	0.394252	0.503781	0.671439	0.506626	0.44317	0.432421	0.388896	0.337777	0.560201	0.402567	0.491316	0.531052	0.451927	0.405586	0.554496	0.549422	0.466836	0.527455	0.616757	0.432448	0.396714	0.483908	0.453901	0.352278	0.459895	0.527041	0.48227	0.618609	0.382914	0.358046	0.570383	0.44885	0.438857	0.456566	0.719628	0.488355
cg03754825	0.513293	0.510304	0.39607	0.531377	0.583867	0.596999	0.189775	0.445787	0.592382	0.558843	0.520117	0.482139	0.540505	0.454733	0.528702	0.682191	0.489505	0.655342	0.341806	0.498683	0.513851	0.756301	0.517407	0.608827	0.54211	0.328214	0.528516	0.42335	0.586943	0.528679	0.368756	0.508408	0.592681	0.414523	0.448056	0.636672	0.292066	0.516747	0.515174	0.584635	0.720619	0.557932	0.512844	0.627661	0.402298	0.536783	0.527267	0.633662	0.589742
cg18344468	0.517864	0.485281	0.451811	0.497898	0.5581	0.541182	0.482595	0.492289	0.567227	0.508817	0.51849	0.550889	0.534023	0.500852	0.537226	0.488188	0.591516	0.531077	0.518528	0.506843	0.414673	0.473082	0.522047	0.476965	0.504093	0.622492	0.547304	0.514383	0.519012	0.511398	0.520279	0.627478	0.434667	0.487846	0.469358	0.507917	0.451855	0.523812	0.602981	0.511831	0.710075	0.438515	0.510073	0.641045	0.50229	0.539479	0.558633	0.718491	0.558004
cg14714537	0.0656248	0.0848002	0.085778	0.0980443	0.0998108	0.0983065	0.0221599	0.0322531	0.054492	0.118273	0.0433033	0.0984807	0.096823	0.0409732	0.0711708	0.315026	0.0495654	0.0308335	0.0355657	0.0273841	0.0245966	0.176616	0.0335843	0.0351472	0.0570714	0.125104	0.040093	0.367091	0.13565	0.0577522	0.0567162	0.554066	0.0411948	0.0447001	0.0447645	0.023782	0.0246159	0.093733	0.098147	0.0348292	0.500676	0.0599276	0.039442	0.194734	0.0343398	0.0496789	0.0591555	0.618255	0.0728192
cg08651538	0.700279	0.788088	0.791601	0.694429	0.701326	0.71897	0.8332	0.757114	0.731099	0.746191	0.770088	0.736033	0.760821	0.734085	0.689477	0.651084	0.784152	0.671092	0.84329	0.728887	0.746266	0.619073	0.780013	0.731423	0.75992	0.818303	0.66759	0.721419	0.71467	0.73925	0.7909	0.636236	0.747194	0.795669	0.805813	0.756277	0.819151	0.756845	0.689655	0.680025	0.534067	0.730935	0.685661	0.603743	0.719109	0.705494	0.727843	0.627039	0.722157
cg04242580	0.397525	0.324594	0.238082	0.441595	0.403862	0.482471	0.122667	0.345716	0.438044	0.417095	0.380151	0.412774	0.462333	0.359286	0.446387	0.638538	0.456368	0.499331	0.21152	0.261834	0.377444	0.559152	0.4188	0.449795	0.418279	0.234908	0.406757	0.304923	0.441399	0.453002	0.366481	0.433427	0.4698	0.316716	0.32186	0.372041	0.272495	0.349043	0.382747	0.416589	0.595504	0.468981	0.389155	0.525388	0.333546	0.418508	0.375522	0.548226	0.383214
cg07003429	0.500177	0.46489	0.362003	0.512507	0.556672	0.554912	0.304818	0.48665	0.585355	0.566625	0.492457	0.505667	0.524686	0.483836	0.498544	0.67097	0.593733	0.59759	0.354709	0.448823	0.477237	0.698062	0.473878	0.557096	0.522767	0.434349	0.533444	0.521109	0.608043	0.558187	0.498232	0.576322	0.548826	0.432046	0.436701	0.505755	0.388169	0.508964	0.521486	0.528436	0.6998	0.518628	0.497212	0.67918	0.423905	0.532622	0.501539	0.665689	0.56138
cg22595185	0.554972	0.563335	0.528795	0.606117	0.629929	0.645488	0.323237	0.427082	0.610235	0.63856	0.589041	0.621691	0.66261	0.456408	0.639347	0.767991	0.583181	0.663175	0.492909	0.484761	0.464301	0.775063	0.539096	0.60106	0.552301	0.611312	0.494458	0.788148	0.686781	0.630858	0.496545	0.911053	0.533998	0.41457	0.47071	0.507165	0.386972	0.590124	0.568147	0.595439	0.90611	0.509893	0.497487	0.77471	0.469404	0.56471	0.55016	0.874399	0.603393
cg13630620	0.345147	0.226984	0.227885	0.297365	0.373711	0.32754	0.0870851	0.240065	0.45027	0.337553	0.300244	0.370321	0.409779	0.285339	0.390378	0.422522	0.403	0.446304	0.1684	0.274785	0.200815	0.406959	0.312241	0.350639	0.285982	0.34922	0.361257	0.376758	0.421638	0.343577	0.329939	0.452967	0.184095	0.1846	0.258646	0.27074	0.183005	0.36034	0.406547	0.410098	0.687313	0.20681	0.314316	0.533376	0.266801	0.289965	0.397132	0.61136	0.408907
cg15655274	0.422627	0.29766	0.245625	0.389003	0.45068	0.409464	0.124808	0.345372	0.479155	0.423186	0.357651	0.408865	0.437956	0.361866	0.43092	0.503076	0.471104	0.478635	0.267526	0.34608	0.34389	0.560375	0.410761	0.418264	0.387637	0.401711	0.425954	0.383218	0.501018	0.439288	0.377755	0.483005	0.393994	0.31666	0.359406	0.365454	0.303872	0.409648	0.502136	0.443821	0.663611	0.374729	0.384298	0.549956	0.314669	0.406716	0.420319	0.539032	0.432452
cg25715278	0.42404	0.387519	0.363181	0.463057	0.491678	0.502009	0.254295	0.381943	0.416549	0.476587	0.411945	0.459642	0.462493	0.38475	0.460223	0.536649	0.424477	0.463693	0.346708	0.373366	0.39687	0.528815	0.395417	0.458908	0.454022	0.474288	0.378143	0.665938	0.510192	0.447542	0.419725	0.815035	0.45022	0.377829	0.40399	0.41256	0.314383	0.389252	0.472967	0.480694	0.760885	0.402721	0.368966	0.591881	0.322896	0.417144	0.407164	0.734602	0.416501
cg12543139	0.416229	0.328135	0.328471	0.419706	0.432716	0.396496	0.111832	0.284389	0.452917	0.36272	0.257252	0.462495	0.527128	0.339493	0.450552	0.458429	0.389276	0.550275	0.230708	0.422066	0.380791	0.399576	0.335421	0.38405	0.273752	0.36814	0.424884	0.323249	0.459835	0.327548	0.311594	0.484471	0.263121	0.232615	0.363047	0.247591	0.203626	0.376408	0.462218	0.461693	0.732173	0.257187	0.207671	0.580023	0.309954	0.325061	0.441971	0.657058	0.374962
cg00329972	0.315475	0.212556	0.215226	0.32542	0.312253	0.343212	0.0705529	0.240301	0.332429	0.321734	0.261915	0.301714	0.300487	0.263794	0.341338	0.477922	0.392031	0.382208	0.162776	0.187119	0.25675	0.42961	0.17501	0.323824	0.283561	0.249279	0.335954	0.241188	0.347485	0.360038	0.230494	0.377571	0.304345	0.239301	0.325262	0.297821	0.198651	0.235773	0.288915	0.346841	0.541419	0.304424	0.291561	0.401967	0.201926	0.292321	0.294595	0.394861	0.294099
cg25375916	0.378246	0.260483	0.224742	0.320654	0.367451	0.370945	0.0946295	0.264454	0.48376	0.379274	0.326835	0.371036	0.412264	0.32536	0.402462	0.334184	0.369307	0.491601	0.263406	0.243718	0.243069	0.504944	0.277746	0.379524	0.31051	0.273273	0.405216	0.317206	0.499718	0.357188	0.315761	0.495444	0.265804	0.281662	0.311114	0.305997	0.199559	0.381772	0.411818	0.417868	0.581167	0.303027	0.350865	0.539157	0.316826	0.335135	0.37543	0.591144	0.394822
cg05599099	0.486017	0.40888	0.278178	0.447064	0.580643	0.4976	0.173996	0.407518	0.601057	0.535295	0.465507	0.517276	0.533249	0.450829	0.501096	0.723006	0.625199	0.548694	0.296129	0.440949	0.406605	0.707634	0.539169	0.576386	0.522034	0.326846	0.527452	0.412537	0.567818	0.534098	0.451726	0.538986	0.549767	0.376196	0.446433	0.490818	0.338687	0.527544	0.623953	0.510809	0.746031	0.52282	0.504464	0.68939	0.385173	0.520685	0.489417	0.657249	0.590039
cg15782683	0.505574	0.491325	0.317439	0.493255	0.62478	0.564331	0.187527	0.443138	0.607518	0.557569	0.48787	0.561846	0.551446	0.545892	0.507067	0.768977	0.49551	0.70372	0.322466	0.462339	0.371668	0.732785	0.539226	0.591542	0.525999	0.454619	0.672862	0.498052	0.642929	0.547286	0.446862	0.554587	0.532927	0.387234	0.448862	0.508927	0.356336	0.531753	0.653341	0.53703	0.808301	0.56076	0.527771	0.707085	0.353209	0.568436	0.477916	0.712952	0.564941
cg19589415	0.0672395	0.0635043	0.0690769	0.0926356	0.0886402	0.0924178	0.0319418	0.0296378	0.0691685	0.051642	0.0309372	0.0794968	0.129302	0.0459506	0.0741547	0.107747	0.02373	0.0662215	0.051793	0.0587436	0.0236582	0.0947751	0.0178997	0.0509713	0.0365839	0.0910429	0.0344461	0.301853	0.0907218	0.0632539	0.0953538	0.311538	0.039775	0.0262009	0.0368334	0.0633019	0.0306542	0.0991528	0.0733507	0.0588636	0.328685	0.0327612	0.0425842	0.173775	0.0309621	0.0419289	0.0425947	0.426532	0.0730117
cg06899237	0.351833	0.310033	0.306065	0.379751	0.383371	0.352598	0.117741	0.152826	0.452875	0.432977	0.39608	0.358317	0.390796	0.265331	0.426159	0.441742	0.301941	0.340679	0.354023	0.343256	0.234921	0.485381	0.244987	0.338085	0.387045	0.273361	0.246808	0.487147	0.488486	0.372735	0.293876	0.542032	0.281327	0.218598	0.252431	0.240925	0.319154	0.313358	0.381632	0.440633	0.575989	0.257136	0.311652	0.478378	0.371455	0.276323	0.350003	0.637789	0.280291
cg12916774	0.461355	0.400176	0.345436	0.444454	0.499716	0.515549	0.195939	0.395193	0.566618	0.50389	0.454045	0.497026	0.490296	0.420723	0.469573	0.615276	0.473517	0.553293	0.347995	0.430322	0.420892	0.601044	0.561379	0.45805	0.431226	0.546497	0.524855	0.416372	0.59832	0.475979	0.416089	0.51395	0.416629	0.366219	0.438473	0.446016	0.322538	0.44381	0.458702	0.496047	0.662339	0.465902	0.424515	0.594481	0.37911	0.46735	0.468686	0.635264	0.487485
cg11105718	0.582704	0.594364	0.552902	0.607742	0.613986	0.674499	0.408482	0.538956	0.620607	0.671519	0.644816	0.622676	0.722866	0.541822	0.660521	0.706014	0.6015	0.473856	0.514192	0.62414	0.457819	0.605737	0.436692	0.537988	0.648719	0.674605	0.577195	0.735434	0.635486	0.623672	0.577005	0.846856	0.43775	0.493705	0.555711	0.55892	0.498085	0.596416	0.663011	0.581005	0.824086	0.524674	0.518241	0.722772	0.590591	0.688553	0.598105	0.834401	0.578728
cg23098529	0.350918	0.268997	0.220616	0.334673	0.386814	0.340323	0.148344	0.284581	0.386638	0.36088	0.266479	0.340484	0.38789	0.320876	0.377201	0.460016	0.333698	0.372041	0.275583	0.27207	0.285415	0.46546	0.263323	0.334289	0.28599	0.348884	0.393781	0.387135	0.407047	0.343623	0.354504	0.447378	0.276779	0.261021	0.291151	0.281573	0.197624	0.365695	0.405592	0.404828	0.531081	0.310658	0.323999	0.476432	0.319616	0.323882	0.367123	0.553989	0.357599
cg17496921	0.406737	0.359404	0.265901	0.465876	0.454849	0.457941	0.121934	0.364977	0.471387	0.434578	0.389312	0.427634	0.47725	0.37092	0.429653	0.639992	0.430699	0.494198	0.274033	0.308777	0.38331	0.645272	0.375176	0.49066	0.40857	0.33775	0.418979	0.319793	0.485619	0.465925	0.377516	0.432807	0.419819	0.323228	0.385403	0.416625	0.281972	0.393552	0.404746	0.455884	0.656405	0.449669	0.385939	0.546925	0.328602	0.422096	0.438306	0.546564	0.424347
cg07591518	0.278397	0.226262	0.189152	0.243873	0.28278	0.363094	0.0765862	0.287967	0.284087	0.330861	0.269527	0.171549	0.41042	0.174956	0.367383	0.398273	0.132705	0.471302	0.226926	0.252325	0.132352	0.432601	0.236827	0.325394	0.20283	0.148605	0.278047	0.29246	0.419857	0.300622	0.304107	0.359621	0.171448	0.235444	0.207685	0.214577	0.155826	0.304942	0.334092	0.355543	0.59398	0.272781	0.260327	0.395188	0.285414	0.244556	0.313504	0.496641	0.284825
cg09248826	0.492072	0.41735	0.317298	0.521017	0.522968	0.54319	0.170953	0.472965	0.55861	0.527783	0.471625	0.485664	0.52719	0.430847	0.422035	0.711594	0.506147	0.612086	0.293051	0.410194	0.435317	0.725167	0.488702	0.54298	0.482798	0.360681	0.493239	0.392765	0.599418	0.533035	0.402356	0.546266	0.551587	0.335756	0.398752	0.492731	0.362927	0.459457	0.488451	0.514356	0.685008	0.543942	0.428257	0.665363	0.395099	0.483653	0.492329	0.690601	0.48901
cg20956594	0.507971	0.47004	0.340744	0.553532	0.593012	0.526116	0.234356	0.461484	0.646791	0.569667	0.518759	0.549564	0.552406	0.476357	0.523876	0.79074	0.553051	0.611007	0.334053	0.486487	0.463118	0.724298	0.439166	0.601745	0.466186	0.366102	0.539331	0.426418	0.588396	0.555466	0.458236	0.577983	0.524722	0.384436	0.463791	0.495467	0.401138	0.56853	0.608327	0.546804	0.747209	0.537256	0.554429	0.682844	0.403523	0.57011	0.517255	0.673928	0.581333
cg01745766	0.737029	0.826669	0.813779	0.740365	0.770801	0.735927	0.880348	0.793639	0.807986	0.811936	0.813908	0.763939	0.700594	0.801485	0.777838	0.659149	0.737503	0.720947	0.826228	0.868314	0.776687	0.591285	0.719054	0.786752	0.825277	0.814701	0.700194	0.720912	0.712636	0.724295	0.802926	0.71237	0.767419	0.783468	0.833192	0.797504	0.859606	0.795784	0.738822	0.68802	0.540341	0.718106	0.688124	0.60635	0.775401	0.769374	0.726196	0.551919	0.707627
cg17293845	0.425706	0.306822	0.285978	0.388	0.418571	0.415926	0.142744	0.343719	0.456624	0.40058	0.339832	0.402608	0.435673	0.364033	0.424325	0.498876	0.357665	0.497298	0.404167	0.306486	0.304316	0.537629	0.426193	0.430916	0.363557	0.361549	0.435011	0.423801	0.449429	0.401704	0.386619	0.476963	0.302889	0.291377	0.412911	0.329228	0.237967	0.39206	0.448971	0.44754	0.695825	0.311396	0.355913	0.543723	0.332789	0.391484	0.414989	0.598169	0.410574
cg17157356	0.71891	0.870295	0.833374	0.732263	0.787538	0.741195	0.922076	0.831593	0.777515	0.794745	0.828881	0.746442	0.768979	0.805488	0.695435	0.641907	0.759528	0.632425	0.849675	0.827275	0.82456	0.620335	0.745711	0.760884	0.799315	0.857435	0.733978	0.786376	0.742604	0.754927	0.844824	0.667022	0.850828	0.8375	0.813988	0.773192	0.880358	0.840964	0.77299	0.712231	0.544986	0.7676	0.695195	0.624226	0.842304	0.743472	0.756262	0.593737	0.753102
cg09315501	0.291944	0.151993	0.148545	0.215583	0.290969	0.303138	0.0689048	0.158051	0.303791	0.288496	0.232967	0.322625	0.321617	0.195835	0.339847	0.347846	0.265561	0.375273	0.153412	0.190969	0.134567	0.412267	0.236734	0.28652	0.233218	0.145788	0.285343	0.399782	0.402743	0.283969	0.250464	0.476441	0.125553	0.168877	0.208642	0.179544	0.0922002	0.279827	0.35508	0.350852	0.693426	0.177713	0.240769	0.466612	0.207564	0.21994	0.261159	0.582707	0.33107
cg20389097	0.534598	0.498037	0.339992	0.590229	0.509112	0.534524	0.329969	0.490257	0.648257	0.560398	0.513813	0.564964	0.589997	0.530118	0.480075	0.722384	0.599534	0.669756	0.40552	0.495002	0.443479	0.730833	0.621885	0.489702	0.490254	0.48728	0.617856	0.41692	0.545477	0.536465	0.47806	0.662911	0.560281	0.431099	0.496472	0.5602	0.437575	0.581146	0.627778	0.55887	0.725205	0.556476	0.503365	0.643824	0.432159	0.588068	0.549601	0.662776	0.606992
cg18028160	0.26003	0.288224	0.211594	0.336465	0.330655	0.359928	0.0735887	0.276369	0.351815	0.295043	0.313752	0.374182	0.34386	0.285118	0.249992	0.568621	0.364636	0.37595	0.13917	0.234737	0.264807	0.545296	0.243378	0.311348	0.320418	0.231999	0.353619	0.275631	0.307966	0.349718	0.247953	0.478602	0.281943	0.219355	0.225285	0.320805	0.199591	0.393563	0.273671	0.315148	0.635146	0.313701	0.269085	0.467631	0.142958	0.393597	0.336146	0.689705	0.338117
cg05156137	0.390918	0.519075	0.42184	0.410423	0.555595	0.491569	0.333691	0.392477	0.692455	0.536611	0.518268	0.430075	0.516765	0.410882	0.423635	0.519371	0.533421	0.483284	0.461489	0.457416	0.199089	0.482646	0.395812	0.421648	0.517005	0.580447	0.475375	0.691276	0.615925	0.447345	0.660282	0.771356	0.253372	0.300243	0.531594	0.332648	0.347249	0.49932	0.521007	0.48507	0.687094	0.442947	0.421037	0.608088	0.442429	0.408767	0.482139	0.771914	0.60655
cg10199368	0.498064	0.435256	0.349834	0.520958	0.551868	0.535242	0.154694	0.41511	0.603237	0.504613	0.525899	0.502764	0.513394	0.446016	0.517628	0.686215	0.583143	0.642665	0.307045	0.427861	0.449106	0.728608	0.512467	0.563261	0.538639	0.387217	0.508564	0.341145	0.656147	0.562081	0.410249	0.618701	0.476097	0.381629	0.420668	0.527611	0.32152	0.49004	0.557839	0.513466	0.7632	0.514876	0.432808	0.675881	0.376131	0.507322	0.556639	0.690567	0.530622
cg14879089	0.182902	0.273521	0.179296	0.240025	0.258169	0.332574	0.0497503	0.123196	0.394211	0.332576	0.30082	0.306132	0.396027	0.133952	0.388978	0.439893	0.289287	0.265111	0.103563	0.207152	0.123742	0.420024	0.159496	0.237874	0.263762	0.311512	0.174343	0.520709	0.457106	0.369727	0.302979	0.528734	0.216549	0.114759	0.170569	0.203909	0.146365	0.297712	0.278942	0.35209	0.61329	0.178204	0.1338	0.428281	0.158985	0.268286	0.230597	0.64097	0.173824
cg06094386	0.820421	0.91274	0.878681	0.837494	0.866146	0.860327	0.917061	0.898654	0.850291	0.846779	0.871402	0.879685	0.888898	0.876211	0.793788	0.730857	0.884984	0.819998	0.915429	0.919895	0.867436	0.808121	0.815876	0.863699	0.92402	0.85323	0.840528	0.790925	0.8279	0.862253	0.88946	0.697947	0.925517	0.886121	0.897649	0.901597	0.940952	0.901541	0.798846	0.832111	0.617117	0.866773	0.871759	0.695754	0.868015	0.84451	0.791528	0.650398	0.843952
cg12732334	0.392011	0.543126	0.421004	0.475492	0.541894	0.539608	0.403142	0.321549	0.567551	0.585574	0.496227	0.555101	0.515637	0.321252	0.542428	0.611586	0.505134	0.448688	0.41029	0.48491	0.358234	0.598279	0.307041	0.406413	0.544926	0.537987	0.329285	0.597633	0.598529	0.511439	0.530076	0.721577	0.446303	0.329849	0.450353	0.385206	0.424783	0.478144	0.465549	0.594255	0.735221	0.452752	0.4006	0.627918	0.431713	0.417974	0.486241	0.799126	0.488163
cg24446385	0.727297	0.745479	0.808473	0.666121	0.693566	0.646407	0.864876	0.710895	0.680874	0.721495	0.722947	0.669689	0.678738	0.736699	0.700287	0.5273	0.660218	0.635749	0.841922	0.813876	0.753008	0.489148	0.719778	0.673177	0.754104	0.808974	0.727231	0.75098	0.654023	0.688567	0.772337	0.693813	0.710338	0.775956	0.767542	0.770954	0.829072	0.759012	0.736993	0.653463	0.580069	0.616211	0.665054	0.585747	0.78795	0.6992	0.677617	0.612015	0.73008
cg17177779	0.593576	0.503753	0.437747	0.569007	0.615397	0.58287	0.393057	0.446037	0.62454	0.58319	0.482927	0.647643	0.654676	0.564237	0.562476	0.682338	0.678883	0.610143	0.445083	0.491135	0.551792	0.68884	0.529277	0.54973	0.548368	0.505655	0.654393	0.483311	0.649033	0.608153	0.531848	0.568504	0.569253	0.474463	0.618646	0.638856	0.490554	0.571902	0.740206	0.631581	0.76167	0.521349	0.547657	0.714551	0.55682	0.556291	0.499774	0.766596	0.586472
cg00520410	0.567354	0.543908	0.571893	0.570277	0.578531	0.663296	0.497199	0.481256	0.603659	0.559857	0.537328	0.676975	0.697749	0.543192	0.644727	0.587842	0.679045	0.622989	0.524083	0.508685	0.448522	0.569211	0.583635	0.513864	0.52716	0.640647	0.550726	0.614347	0.659934	0.600575	0.532827	0.710299	0.495039	0.581846	0.549546	0.590418	0.471278	0.565228	0.515807	0.584296	0.793486	0.527013	0.53493	0.720275	0.610989	0.597642	0.608459	0.792437	0.596099
cg06693581	0.539811	0.518994	0.458319	0.586407	0.576109	0.628587	0.340753	0.513565	0.596172	0.553681	0.554693	0.596793	0.5825	0.532924	0.656372	0.70047	0.621806	0.708107	0.418666	0.515301	0.487921	0.766371	0.46735	0.638223	0.507671	0.538063	0.600136	0.530098	0.559455	0.593	0.509555	0.629175	0.522502	0.472655	0.524057	0.522559	0.41667	0.539643	0.550968	0.586747	0.81813	0.566699	0.529681	0.734311	0.590044	0.573338	0.607614	0.688709	0.549967
cg21612926	0.357391	0.266324	0.288662	0.362113	0.370287	0.295007	0.126049	0.300011	0.434067	0.338454	0.307276	0.335088	0.365386	0.341795	0.386709	0.395001	0.348855	0.437185	0.1767	0.297393	0.276051	0.456496	0.192631	0.330899	0.274995	0.243963	0.332397	0.187271	0.291187	0.340764	0.197531	0.370794	0.347819	0.290031	0.273575	0.347065	0.209722	0.328357	0.328489	0.342443	0.614782	0.330486	0.330013	0.416301	0.238713	0.444352	0.340456	0.520868	0.402609
cg11782533	0.37633	0.317572	0.262222	0.397716	0.389344	0.411566	0.159685	0.365903	0.43022	0.423697	0.348709	0.395149	0.379804	0.370896	0.381088	0.556984	0.368866	0.443496	0.241746	0.30878	0.349126	0.481255	0.309378	0.417023	0.367704	0.249733	0.427686	0.326858	0.429744	0.437628	0.31066	0.438294	0.443861	0.325366	0.393204	0.372171	0.245196	0.295217	0.363245	0.382521	0.555607	0.423862	0.346616	0.482199	0.270159	0.413719	0.401093	0.487729	0.39236
cg06841648	0.748737	0.861232	0.839415	0.78335	0.762036	0.79098	0.839378	0.82526	0.762446	0.79357	0.788928	0.702574	0.714541	0.815661	0.785555	0.579472	0.76322	0.728045	0.850449	0.823449	0.880762	0.686165	0.754427	0.781044	0.813135	0.794391	0.79436	0.799692	0.758606	0.754173	0.83604	0.656094	0.826984	0.844551	0.834905	0.783672	0.83095	0.778577	0.726415	0.71838	0.581897	0.80214	0.762177	0.628618	0.795154	0.742804	0.742968	0.610419	0.729465
cg14303369	0.506144	0.587453	0.456041	0.585965	0.478981	0.570449	0.550473	0.637132	0.509592	0.479949	0.476878	0.610132	0.48961	0.629842	0.498738	0.271998	0.6416	0.528745	0.625446	0.634086	0.558306	0.359063	0.550316	0.56002	0.485814	0.582484	0.603476	0.558153	0.418415	0.507081	0.515786	0.498374	0.610992	0.628225	0.638535	0.588458	0.597862	0.600567	0.510431	0.475836	0.33914	0.628456	0.382929	0.441906	0.685661	0.534757	0.545091	0.35238	0.608311
cg24140751	0.54238	0.479728	0.450518	0.530422	0.570283	0.54848	0.260154	0.480995	0.582894	0.572007	0.490817	0.589146	0.589357	0.48993	0.556713	0.680287	0.624585	0.623781	0.39423	0.47436	0.420571	0.757628	0.567928	0.583149	0.47715	0.555885	0.557968	0.493863	0.656245	0.563589	0.51432	0.597194	0.544345	0.442456	0.522857	0.513537	0.421788	0.530186	0.538583	0.577806	0.777856	0.558172	0.515793	0.682699	0.454608	0.583072	0.560276	0.714362	0.548048
cg13765061	0.418963	0.315982	0.191312	0.312888	0.511068	0.4246	0.160664	0.359428	0.482047	0.467626	0.357039	0.384473	0.417735	0.413101	0.469227	0.585382	0.30123	0.512292	0.328299	0.306135	0.315341	0.55325	0.332695	0.402937	0.382773	0.346867	0.473944	0.290087	0.444169	0.460772	0.3084	0.451031	0.440275	0.300563	0.391774	0.348246	0.277912	0.409675	0.553277	0.417629	0.644219	0.333302	0.352225	0.519751	0.263737	0.379366	0.408567	0.547407	0.489061
cg04450555	0.588206	0.613214	0.705952	0.555199	0.561997	0.525747	0.70902	0.576632	0.545146	0.532099	0.596237	0.762743	0.715021	0.614387	0.469499	0.492681	0.65237	0.476649	0.657125	0.700148	0.587855	0.489117	0.589395	0.595857	0.662667	0.548429	0.573055	0.568706	0.448511	0.497122	0.567562	0.48137	0.649475	0.741962	0.635537	0.655923	0.683309	0.502211	0.583857	0.471325	0.317322	0.552518	0.526074	0.464511	0.585564	0.602315	0.561118	0.503434	0.634324
cg08083229	0.480185	0.474305	0.387749	0.524851	0.51305	0.536648	0.24179	0.459614	0.590993	0.590313	0.523327	0.57998	0.55219	0.477372	0.493134	0.70449	0.480717	0.571488	0.384829	0.406997	0.441434	0.709419	0.38842	0.518261	0.495376	0.479442	0.511759	0.557461	0.574315	0.552025	0.459885	0.658668	0.496628	0.418438	0.451586	0.506883	0.364855	0.489012	0.487099	0.499516	0.732962	0.566782	0.51258	0.657402	0.451077	0.543037	0.496094	0.741696	0.490419
cg04137142	0.354666	0.192862	0.179186	0.207151	0.219942	0.601401	0.499911	0.153403	0.193587	0.282097	0.217247	0.249845	0.358912	0.142996	0.289898	0.759967	0.311977	0.52224	0.0809479	0.255904	0.163021	0.386617	0.131191	0.226875	0.626082	0.100841	0.120372	0.433909	0.498907	0.269466	0.229588	0.548091	0.227804	0.198903	0.293731	0.16508	0.148407	0.518344	0.522999	0.129653	0.473627	0.331802	0.0584927	0.46504	0.179467	0.201164	0.576798	0.802325	0.274734
cg19661705	0.372597	0.443592	0.43207	0.399986	0.357689	0.369631	0.549141	0.384766	0.391016	0.413658	0.406932	0.329189	0.384417	0.386607	0.413899	0.155701	0.320249	0.328137	0.470497	0.466418	0.347075	0.182926	0.313998	0.31652	0.433069	0.51046	0.325832	0.452341	0.389825	0.354499	0.467794	0.375726	0.444091	0.500045	0.503867	0.396365	0.480546	0.416664	0.283603	0.254018	0.178106	0.316398	0.287536	0.232666	0.357621	0.338054	0.386841	0.208324	0.331162
cg24709999	0.382449	0.341301	0.395517	0.329523	0.379667	0.351913	0.260944	0.245982	0.432342	0.432182	0.402201	0.389235	0.403522	0.366716	0.403607	0.418705	0.403482	0.443939	0.383093	0.347994	0.284056	0.399357	0.404591	0.298129	0.335026	0.44244	0.33258	0.470599	0.453936	0.371769	0.43317	0.517335	0.21911	0.252283	0.346285	0.268315	0.317417	0.413631	0.42728	0.43288	0.564005	0.333156	0.294032	0.491705	0.339589	0.354065	0.395173	0.598726	0.448945
cg11573174	0.410108	0.338879	0.295133	0.389749	0.441341	0.448237	0.170943	0.349788	0.462316	0.441614	0.395021	0.428899	0.450142	0.361289	0.446789	0.539474	0.398463	0.464375	0.308915	0.335219	0.367539	0.552916	0.422852	0.456136	0.409417	0.30323	0.436009	0.401694	0.511742	0.446492	0.39672	0.50567	0.382026	0.332185	0.39321	0.429373	0.277126	0.413838	0.407765	0.432378	0.636075	0.380117	0.358207	0.553338	0.343198	0.416444	0.376723	0.582641	0.421915
cg06274263	0.423558	0.32354	0.225044	0.409919	0.508116	0.435126	0.114588	0.304177	0.538034	0.453983	0.370699	0.447977	0.425901	0.324941	0.468524	0.468375	0.449269	0.566635	0.287052	0.404941	0.166071	0.673329	0.472217	0.445998	0.410818	0.279968	0.458598	0.435238	0.572561	0.462965	0.298584	0.492138	0.369251	0.288768	0.350945	0.284883	0.227186	0.473791	0.516671	0.515394	0.736812	0.418268	0.440197	0.618433	0.328046	0.40945	0.507048	0.66762	0.43081
cg05191405	0.351441	0.269583	0.231363	0.333249	0.373406	0.384354	0.123251	0.299376	0.396946	0.362582	0.319516	0.346741	0.363651	0.307847	0.380011	0.443472	0.388271	0.434128	0.238846	0.292162	0.27136	0.459487	0.311567	0.388118	0.329658	0.291981	0.406751	0.333407	0.412202	0.391232	0.336084	0.416938	0.32661	0.268676	0.315863	0.334533	0.244473	0.338291	0.396329	0.35938	0.575249	0.359842	0.330549	0.47952	0.280841	0.359702	0.34367	0.507369	0.359174
cg12126706	0.509868	0.368099	0.320171	0.440195	0.458308	0.525904	0.201458	0.371518	0.562434	0.494291	0.406411	0.545827	0.53055	0.461454	0.502579	0.517888	0.48501	0.612259	0.460178	0.413179	0.327315	0.724821	0.426268	0.478765	0.416751	0.412618	0.54545	0.435926	0.589321	0.410342	0.408484	0.545516	0.434714	0.400419	0.422386	0.367871	0.329111	0.593108	0.530497	0.516063	0.777344	0.450473	0.467017	0.68354	0.505547	0.497019	0.508675	0.706592	0.534935
cg23020090	0.6051	0.58652	0.425094	0.659817	0.687493	0.651893	0.348954	0.602948	0.70984	0.678543	0.624627	0.635727	0.612605	0.572698	0.616899	0.868235	0.693552	0.764057	0.463978	0.576633	0.527608	0.844372	0.624231	0.633477	0.580498	0.576079	0.665901	0.57648	0.693796	0.66797	0.58394	0.662261	0.715017	0.499522	0.640668	0.623558	0.515399	0.65432	0.703429	0.609267	0.847517	0.68212	0.668332	0.783557	0.58229	0.671115	0.669961	0.791335	0.649528
cg08183303	0.530148	0.342217	0.452114	0.504168	0.458776	0.489228	0.22004	0.391466	0.449986	0.492064	0.479707	0.501911	0.559758	0.383893	0.399373	0.809256	0.509708	0.514781	0.368425	0.326988	0.41048	0.639571	0.46874	0.477596	0.50772	0.455511	0.385566	0.516241	0.591419	0.50262	0.503198	0.724336	0.486063	0.399477	0.434527	0.447169	0.409483	0.439747	0.523535	0.471494	0.745513	0.509505	0.513927	0.600323	0.370183	0.504002	0.418536	0.725633	0.480503
cg13080316	0.58728	0.532555	0.443705	0.573484	0.620558	0.678564	0.282223	0.516698	0.661811	0.579042	0.557444	0.629219	0.613069	0.505594	0.601732	0.550897	0.646536	0.644761	0.402171	0.424878	0.475738	0.66193	0.594311	0.631324	0.565719	0.411297	0.58978	0.483173	0.585335	0.533437	0.469085	0.5907	0.536112	0.445313	0.515613	0.527289	0.425734	0.547032	0.590069	0.624862	0.809436	0.590897	0.543876	0.736185	0.506984	0.554899	0.56935	0.717497	0.570308
cg24427724	0.666025	0.584626	0.646425	0.668314	0.678155	0.712234	0.530327	0.575483	0.719139	0.632448	0.614525	0.65933	0.73021	0.555896	0.669055	0.632216	0.681421	0.672604	0.581744	0.655889	0.559639	0.713151	0.65772	0.625996	0.648791	0.761614	0.63965	0.882624	0.731316	0.67285	0.703351	0.882826	0.491749	0.567677	0.572698	0.568822	0.496685	0.653581	0.688667	0.618388	0.917978	0.564832	0.616251	0.796545	0.597531	0.57501	0.653168	0.922551	0.665948
cg03714633	0.581963	0.507692	0.409089	0.578616	0.643218	0.60492	0.307765	0.505666	0.658643	0.640154	0.594272	0.613342	0.635654	0.537074	0.610845	0.727744	0.580705	0.702538	0.449872	0.481244	0.533152	0.699418	0.485708	0.591073	0.550083	0.541533	0.59629	0.471697	0.676687	0.554299	0.581001	0.700131	0.589594	0.455443	0.555942	0.662124	0.362177	0.596693	0.687824	0.621129	0.835599	0.589598	0.555624	0.694488	0.509939	0.611406	0.540001	0.6925	0.589996
cg03011556	0.547435	0.482707	0.399105	0.562269	0.589431	0.572016	0.185936	0.431914	0.666501	0.590763	0.476115	0.606404	0.561829	0.483224	0.595815	0.77379	0.576056	0.623073	0.394758	0.46933	0.46567	0.812587	0.526701	0.641504	0.493496	0.41395	0.49893	0.602009	0.639089	0.543659	0.458429	0.726255	0.546425	0.407426	0.49764	0.533414	0.350968	0.560193	0.597498	0.595923	0.819411	0.55344	0.521039	0.724853	0.458357	0.484963	0.569399	0.764445	0.508246
cg11254053	0.502605	0.439706	0.353084	0.539732	0.547105	0.569479	0.170861	0.428952	0.572409	0.548431	0.490212	0.57658	0.555724	0.429104	0.494723	0.813966	0.620744	0.666202	0.303452	0.398206	0.429066	0.762122	0.459889	0.588138	0.505564	0.371425	0.480473	0.446975	0.587854	0.548351	0.388449	0.574883	0.561436	0.351397	0.489373	0.504503	0.343758	0.495698	0.503342	0.538751	0.748769	0.547918	0.482008	0.708037	0.418305	0.548686	0.506021	0.685423	0.509846
cg11376472	0.461424	0.410879	0.341928	0.498564	0.528536	0.522527	0.151884	0.412668	0.509267	0.489349	0.442961	0.505639	0.483922	0.398029	0.550128	0.734646	0.52431	0.526813	0.293835	0.327702	0.443317	0.651596	0.450693	0.52671	0.455424	0.396244	0.438653	0.544602	0.581717	0.489147	0.399124	0.737685	0.474633	0.324363	0.389519	0.449696	0.314887	0.421233	0.481694	0.507598	0.762758	0.491881	0.403398	0.664942	0.360803	0.469568	0.419024	0.756765	0.480267
cg15978561	0.170579	0.120308	0.0956666	0.120965	0.206592	0.205984	0.0213764	0.0666298	0.200426	0.196269	0.148909	0.205738	0.270157	0.136726	0.204591	0.114797	0.221201	0.260569	0.100873	0.141155	0.0383057	0.258579	0.146311	0.204562	0.084316	0.206917	0.170094	0.226586	0.260872	0.15885	0.220786	0.291468	0.0746882	0.0569474	0.123939	0.0965012	0.0798585	0.23473	0.252445	0.275336	0.528585	0.107054	0.130965	0.33842	0.199006	0.147219	0.245971	0.412255	0.20102
cg19152255	0.463482	0.527261	0.383472	0.597485	0.538642	0.595276	0.257015	0.430275	0.657607	0.530713	0.49087	0.549296	0.517816	0.508805	0.491154	0.752439	0.532638	0.641027	0.339933	0.518566	0.443607	0.720363	0.358014	0.535314	0.461573	0.528412	0.507383	0.439601	0.569516	0.503004	0.449781	0.595663	0.584196	0.435385	0.404314	0.575479	0.402182	0.444584	0.497269	0.521426	0.712424	0.580155	0.520056	0.643493	0.436619	0.579335	0.507864	0.66854	0.522952
cg13446689	0.283568	0.253925	0.273155	0.419617	0.378181	0.402466	0.207478	0.215718	0.249463	0.399261	0.229298	0.431509	0.452335	0.202684	0.408845	0.358737	0.224084	0.311146	0.175149	0.302865	0.294734	0.217772	0.191265	0.352426	0.359575	0.303465	0.269036	0.40356	0.302011	0.326397	0.300253	0.548151	0.152249	0.137715	0.29834	0.264929	0.215899	0.253122	0.292534	0.388253	0.525636	0.275783	0.25775	0.451534	0.361474	0.365437	0.48378	0.529579	0.311803
cg06887251	0.577881	0.648277	0.70319	0.615878	0.530661	0.645285	0.72924	0.550303	0.588519	0.580624	0.608455	0.619707	0.713533	0.617812	0.57268	0.381239	0.70215	0.503316	0.723598	0.641642	0.578806	0.412077	0.535207	0.633239	0.559769	0.657404	0.532008	0.585171	0.592944	0.587195	0.70403	0.517936	0.576724	0.682601	0.692058	0.703131	0.702559	0.582546	0.406943	0.544728	0.433634	0.543209	0.493723	0.493636	0.707145	0.585829	0.560743	0.538948	0.543773
cg27111444	0.775518	0.801895	0.769316	0.803323	0.721389	0.759294	0.848789	0.759043	0.734741	0.737145	0.800075	0.787514	0.752744	0.837474	0.72848	0.671962	0.883122	0.833814	0.786366	0.788986	0.84645	0.663842	0.839104	0.838281	0.812289	0.665726	0.808875	0.582025	0.626165	0.741625	0.797137	0.578253	0.784822	0.835419	0.768324	0.877533	0.798772	0.812706	0.740822	0.697374	0.513608	0.822607	0.721622	0.652866	0.841809	0.809712	0.75043	0.542908	0.829439
cg25794292	0.879904	0.911534	0.896631	0.932269	0.871418	0.897584	0.933517	0.93279	0.824087	0.896775	0.889165	0.813678	0.882216	0.890092	0.839618	0.842699	0.828158	0.87429	0.925453	0.905568	0.930847	0.848394	0.819798	0.905192	0.914461	0.841021	0.799159	0.760282	0.822616	0.882318	0.890417	0.789463	0.958586	0.924567	0.957751	0.922012	0.934713	0.89428	0.649047	0.843524	0.701021	0.888203	0.792463	0.737243	0.833928	0.875309	0.855897	0.727761	0.835137
cg11315312	0.119851	0.0984205	0.121462	0.117814	0.144328	0.153108	0.0632862	0.111978	0.0812183	0.111449	0.0713828	0.120679	0.148381	0.0701684	0.145567	0.20249	0.145443	0.119578	0.0469179	0.0680354	0.0903295	0.219502	0.0620579	0.0989304	0.0936679	0.119438	0.0739836	0.404205	0.126877	0.112331	0.0989572	0.56388	0.110756	0.0646496	0.0709343	0.0786597	0.0470924	0.135648	0.0961347	0.0843885	0.366629	0.105863	0.0762394	0.191209	0.0552956	0.139626	0.0644869	0.421761	0.0890048
cg22726370	0.475922	0.462866	0.360566	0.512976	0.534671	0.551943	0.233656	0.424304	0.53714	0.512672	0.485684	0.548969	0.580136	0.459584	0.507802	0.730073	0.620126	0.57937	0.337099	0.408116	0.457198	0.684633	0.447019	0.587758	0.481861	0.42625	0.517918	0.459522	0.577997	0.520476	0.459772	0.553932	0.544126	0.38555	0.470855	0.524815	0.375698	0.479575	0.49177	0.535501	0.739478	0.502726	0.48268	0.643333	0.431961	0.506784	0.537502	0.668132	0.522797
cg14108875	0.596708	0.548724	0.470942	0.621899	0.603016	0.652801	0.310918	0.55749	0.604963	0.635375	0.547908	0.650018	0.609941	0.565078	0.628605	0.764022	0.653987	0.723296	0.48176	0.459909	0.516826	0.792946	0.522913	0.63914	0.512626	0.543784	0.596343	0.495134	0.703334	0.601974	0.539567	0.61804	0.657869	0.513529	0.561404	0.62193	0.448594	0.563731	0.565099	0.624146	0.773741	0.644481	0.545734	0.745508	0.5449	0.637914	0.582509	0.706182	0.571887
cg22324068	0.678084	0.77233	0.745348	0.697175	0.750631	0.692817	0.789732	0.735445	0.750462	0.743575	0.764124	0.719545	0.758692	0.730921	0.725401	0.70919	0.705128	0.63599	0.825784	0.761798	0.723111	0.633397	0.667304	0.638694	0.746271	0.714523	0.671322	0.747484	0.70642	0.78356	0.78476	0.64673	0.728008	0.808075	0.750625	0.76193	0.836579	0.749515	0.692325	0.710297	0.548323	0.743809	0.673231	0.582397	0.799607	0.65648	0.713851	0.659574	0.722006
cg05279761	0.417261	0.36636	0.358266	0.427146	0.43383	0.441437	0.0902945	0.300764	0.439758	0.458397	0.406971	0.318664	0.484918	0.290967	0.413615	0.64103	0.439969	0.500855	0.258392	0.325516	0.374484	0.561636	0.377912	0.376533	0.400425	0.276683	0.430969	0.353969	0.504911	0.442437	0.337745	0.453328	0.514586	0.327281	0.413979	0.325079	0.268352	0.368602	0.445682	0.446563	0.713392	0.434593	0.426187	0.558877	0.35148	0.384164	0.484675	0.561154	0.337573
cg13078941	0.556173	0.574354	0.5214	0.571095	0.541947	0.65168	0.473336	0.577995	0.633274	0.55774	0.594586	0.647136	0.616746	0.556048	0.657884	0.374818	0.637651	0.730191	0.586131	0.5494	0.549888	0.612216	0.493341	0.592336	0.539955	0.580348	0.609257	0.543482	0.548682	0.536373	0.599491	0.639785	0.46454	0.484398	0.57959	0.525676	0.513104	0.623332	0.5509	0.602509	0.773309	0.525509	0.541028	0.69715	0.606853	0.538291	0.622353	0.778262	0.645938
cg13868473	0.93876	0.933592	0.933676	0.906202	0.920317	0.900229	0.96084	0.942517	0.889746	0.933397	0.944111	0.915129	0.855234	0.964813	0.918547	0.950073	0.952593	0.930671	0.963847	0.963383	0.944534	0.927354	0.958614	0.951144	0.94046	0.950317	0.929205	0.79399	0.813098	0.953049	0.954972	0.768689	0.974558	0.962755	0.948742	0.961199	0.970601	0.938605	0.948878	0.88991	0.657718	0.952618	0.967141	0.825328	0.947203	0.955643	0.927663	0.779561	0.899884
cg19789466	0.108817	0.087259	0.110961	0.0944201	0.137338	0.114874	0.0387714	0.0517285	0.137293	0.13585	0.104662	0.0649286	0.124137	0.0790253	0.140975	0.20697	0.107323	0.121749	0.0735531	0.076258	0.0405758	0.144184	0.0533328	0.0840109	0.129931	0.133569	0.0806761	0.334598	0.160498	0.126845	0.160478	0.397068	0.0463654	0.0611293	0.0707478	0.0653327	0.0604425	0.135347	0.133477	0.142158	0.348706	0.0565983	0.0832061	0.196998	0.0791867	0.0725373	0.0926437	0.387102	0.0774127
cg01763290	0.203294	0.199428	0.194619	0.245223	0.24257	0.248717	0.12126	0.133156	0.217542	0.205128	0.184348	0.215111	0.267716	0.132372	0.249859	0.502655	0.143804	0.160915	0.131858	0.163478	0.172151	0.236893	0.0906066	0.197219	0.142443	0.158677	0.14233	0.477257	0.162818	0.255973	0.167177	0.447666	0.243236	0.175124	0.165561	0.186791	0.129852	0.182947	0.173006	0.162927	0.354129	0.204719	0.125005	0.302237	0.144359	0.152622	0.175946	0.527111	0.187924
cg17161520	0.586796	0.622377	0.687905	0.555255	0.549617	0.562352	0.767463	0.606955	0.550339	0.53711	0.601797	0.525524	0.542317	0.600503	0.598986	0.343579	0.585786	0.44249	0.73798	0.725858	0.606789	0.29168	0.521975	0.57736	0.668721	0.599853	0.541565	0.636389	0.545794	0.53486	0.681274	0.55639	0.557483	0.663599	0.598593	0.571699	0.716368	0.581404	0.576816	0.48979	0.328933	0.530549	0.556304	0.385297	0.636681	0.546338	0.584187	0.417284	0.566363
cg04625615	0.780471	0.832301	0.780722	0.827135	0.749149	0.827419	0.877208	0.871316	0.765303	0.738338	0.828292	0.764874	0.740004	0.835406	0.764878	0.714989	0.860784	0.877017	0.756502	0.785894	0.86388	0.706653	0.794977	0.853037	0.814586	0.731263	0.82693	0.586995	0.719053	0.822784	0.761518	0.514999	0.869411	0.875643	0.785873	0.866566	0.810459	0.755396	0.763805	0.756116	0.497157	0.819732	0.752253	0.66513	0.787019	0.816921	0.802643	0.579949	0.8461
cg22932427	0.573783	0.537368	0.496853	0.602532	0.634682	0.597087	0.430562	0.530332	0.601206	0.62124	0.591033	0.633595	0.593463	0.538841	0.587242	0.735772	0.615078	0.650131	0.477786	0.490903	0.547416	0.736417	0.603584	0.599717	0.615901	0.503351	0.612658	0.581672	0.670082	0.613252	0.650229	0.678402	0.557849	0.52382	0.550359	0.561024	0.455503	0.560479	0.576703	0.621628	0.777373	0.569783	0.543075	0.732314	0.562684	0.582422	0.582381	0.731838	0.597442
cg13977835	0.687298	0.780053	0.689119	0.698859	0.762865	0.671363	0.75152	0.716798	0.687801	0.778811	0.730442	0.6888	0.697862	0.737695	0.635996	0.676257	0.788338	0.580022	0.729634	0.788067	0.784153	0.684231	0.660146	0.692619	0.749571	0.749027	0.674004	0.629333	0.725239	0.707216	0.695209	0.611956	0.812682	0.738393	0.757646	0.748942	0.792513	0.712934	0.693037	0.639927	0.493671	0.714574	0.641864	0.571029	0.716921	0.737249	0.704247	0.561738	0.690204
cg25366054	0.57843	0.503413	0.449701	0.543632	0.615013	0.518932	0.317078	0.448122	0.608944	0.592319	0.50931	0.622904	0.618781	0.535572	0.605475	0.654429	0.536044	0.660928	0.50134	0.496918	0.543521	0.747523	0.519848	0.541203	0.575315	0.41249	0.578484	0.525399	0.618383	0.626213	0.55424	0.637467	0.516313	0.502715	0.490336	0.542677	0.429912	0.579667	0.683496	0.558914	0.770566	0.554109	0.560517	0.69212	0.509573	0.632789	0.545169	0.734549	0.645688
cg00117532	0.462719	0.34615	0.302878	0.400089	0.519184	0.409499	0.19853	0.373994	0.506762	0.463711	0.445044	0.451667	0.465979	0.431925	0.438351	0.480705	0.409998	0.549554	0.328012	0.397765	0.36087	0.537756	0.407114	0.436584	0.44515	0.455289	0.50954	0.434782	0.543221	0.484811	0.431334	0.507528	0.457015	0.365126	0.430029	0.383729	0.355286	0.47337	0.541787	0.485909	0.642675	0.424789	0.411447	0.537446	0.388134	0.477787	0.415883	0.564322	0.485123
cg00617504	0.615958	0.696751	0.741759	0.605156	0.579313	0.60885	0.878134	0.654439	0.62305	0.627104	0.685443	0.601524	0.695951	0.645362	0.60304	0.455504	0.640737	0.514628	0.75495	0.696178	0.652564	0.41416	0.616192	0.612165	0.669355	0.712186	0.599425	0.618614	0.600044	0.618375	0.712443	0.579388	0.639603	0.701446	0.670682	0.650101	0.774201	0.68396	0.639999	0.580073	0.421059	0.587932	0.588145	0.494593	0.738411	0.626101	0.604995	0.514495	0.640775
cg21219880	0.38549	0.346416	0.383386	0.409357	0.346375	0.48539	0.276999	0.351014	0.372511	0.370362	0.356434	0.407676	0.376155	0.325492	0.368597	0.584602	0.367898	0.436765	0.280365	0.332822	0.394159	0.469034	0.345116	0.405757	0.393156	0.370088	0.331645	0.620758	0.363241	0.381244	0.364475	0.732148	0.40432	0.348504	0.359129	0.388287	0.291567	0.347055	0.362031	0.296526	0.55556	0.436983	0.34802	0.482682	0.272801	0.395699	0.331721	0.685596	0.339315
cg17290817	0.524476	0.496493	0.388214	0.518009	0.590873	0.585075	0.236897	0.507353	0.627357	0.593617	0.51976	0.499864	0.510818	0.490646	0.571104	0.770932	0.554401	0.634207	0.319748	0.448199	0.459841	0.779241	0.529148	0.589815	0.515091	0.457132	0.546825	0.382531	0.599885	0.547782	0.445006	0.59992	0.590037	0.44368	0.488702	0.537198	0.389708	0.534004	0.568955	0.552535	0.746995	0.557657	0.520974	0.693985	0.427831	0.589995	0.511424	0.712985	0.570897
cg27305893	0.532873	0.462698	0.426085	0.512035	0.570855	0.555271	0.319035	0.476829	0.598699	0.57245	0.505797	0.560318	0.52556	0.490229	0.519117	0.755022	0.537105	0.590234	0.3756	0.457276	0.438428	0.720759	0.511707	0.573535	0.529393	0.557685	0.546122	0.511441	0.618807	0.551052	0.471196	0.585759	0.564877	0.460498	0.500249	0.529691	0.419855	0.540862	0.557917	0.484766	0.736413	0.536979	0.4947	0.673323	0.453943	0.544726	0.500011	0.701968	0.53595
cg11898431	0.604712	0.664729	0.666858	0.616056	0.627284	0.605967	0.721757	0.721855	0.549562	0.591072	0.618884	0.596748	0.620976	0.690301	0.644081	0.505204	0.615512	0.621864	0.743585	0.743109	0.720383	0.443523	0.610181	0.620569	0.662453	0.67329	0.669095	0.542236	0.542175	0.596876	0.675548	0.537415	0.713408	0.70488	0.678673	0.694787	0.686032	0.608046	0.591089	0.654784	0.36378	0.601178	0.565381	0.533011	0.643231	0.575996	0.67928	0.449813	0.648371
cg12417525	0.504327	0.571463	0.560958	0.508113	0.511898	0.476692	0.660193	0.581625	0.506745	0.531279	0.537183	0.449524	0.464848	0.559789	0.521113	0.405599	0.464588	0.465332	0.623446	0.60508	0.566401	0.297685	0.448534	0.461457	0.598831	0.554118	0.4666	0.579566	0.478588	0.504065	0.594293	0.508382	0.598633	0.636097	0.57799	0.57328	0.640118	0.530405	0.509863	0.458382	0.289395	0.483296	0.44977	0.368952	0.53516	0.500895	0.505326	0.352883	0.507104
cg19791409	0.607501	0.511149	0.460279	0.609276	0.624718	0.629312	0.308113	0.516812	0.661718	0.589423	0.583222	0.627406	0.652315	0.477117	0.614685	0.644477	0.611493	0.679865	0.520589	0.541223	0.431274	0.775573	0.530357	0.619647	0.53298	0.678629	0.577014	0.656854	0.688967	0.610515	0.595404	0.75856	0.579175	0.442756	0.557591	0.575451	0.433342	0.620174	0.69373	0.650797	0.904243	0.531449	0.567826	0.775905	0.524572	0.659402	0.611146	0.773163	0.692644
cg21329264	0.429446	0.334408	0.257168	0.432935	0.412272	0.456762	0.14152	0.365805	0.4641	0.451639	0.39081	0.424704	0.423572	0.379479	0.435442	0.530733	0.496095	0.513692	0.309863	0.305702	0.338403	0.579904	0.397317	0.468923	0.420685	0.266023	0.490509	0.381963	0.505188	0.428588	0.403014	0.436499	0.414908	0.328311	0.392657	0.396186	0.286232	0.404274	0.434066	0.450227	0.626542	0.424702	0.354307	0.534519	0.320213	0.426029	0.387281	0.514434	0.502132
cg13428066	0.4439	0.408956	0.370516	0.480085	0.478285	0.565403	0.137755	0.37249	0.516105	0.44955	0.371766	0.414649	0.401751	0.4645	0.404282	0.660045	0.324414	0.404001	0.296017	0.361592	0.45082	0.564678	0.391121	0.454432	0.438191	0.459347	0.46093	0.594228	0.474972	0.501097	0.3741	0.778722	0.462622	0.336046	0.308889	0.431838	0.266582	0.440183	0.543726	0.397912	0.892971	0.440858	0.424772	0.679838	0.248009	0.501623	0.406836	0.918804	0.4194
cg08507334	0.480318	0.410013	0.302459	0.480902	0.541487	0.530815	0.132173	0.407782	0.578071	0.529233	0.476023	0.558719	0.575385	0.42056	0.571168	0.741844	0.52283	0.620775	0.298614	0.377207	0.381221	0.718421	0.411195	0.542457	0.456876	0.439752	0.558844	0.434169	0.611586	0.512059	0.411114	0.536104	0.472998	0.35611	0.409068	0.460535	0.323246	0.496888	0.564691	0.540487	0.773246	0.485411	0.390999	0.674709	0.370551	0.496426	0.44615	0.67215	0.575156
cg00473633	0.536281	0.43269	0.427296	0.403127	0.573782	0.582104	0.310612	0.487912	0.569413	0.616387	0.545301	0.530181	0.519593	0.454531	0.530398	0.712121	0.389094	0.437333	0.432532	0.523732	0.312752	0.681984	0.619758	0.555112	0.532357	0.54055	0.548264	0.628649	0.629407	0.541149	0.541583	0.54514	0.491041	0.334448	0.503998	0.487535	0.430316	0.45312	0.640992	0.548794	0.617472	0.582747	0.476235	0.655549	0.465633	0.550775	0.502215	0.733553	0.521405
cg19414383	0.417787	0.387681	0.417747	0.334605	0.406153	0.35277	0.543638	0.421373	0.284896	0.335135	0.439054	0.29275	0.307376	0.460867	0.299657	0.133623	0.412223	0.341877	0.541225	0.473836	0.457207	0.176239	0.371179	0.378891	0.521767	0.390944	0.429762	0.195072	0.270687	0.363905	0.423556	0.202504	0.456733	0.523272	0.48033	0.498828	0.582033	0.384338	0.362456	0.337597	0.120372	0.386314	0.329506	0.198781	0.383863	0.398269	0.393512	0.12732	0.361249
cg24265997	0.768279	0.868988	0.896495	0.769445	0.783993	0.760122	0.9311	0.80476	0.788244	0.830768	0.829992	0.778938	0.83404	0.834477	0.761629	0.746888	0.806911	0.714554	0.899842	0.876028	0.800566	0.604595	0.844899	0.818094	0.729709	0.963042	0.760798	0.829041	0.779742	0.801875	0.857672	0.761815	0.830765	0.851651	0.836293	0.826417	0.895535	0.857119	0.81272	0.743905	0.525894	0.7671	0.732667	0.668404	0.879681	0.79804	0.755693	0.674938	0.790965
cg00975624	0.478312	0.451259	0.397804	0.478303	0.53432	0.531081	0.306216	0.453278	0.520184	0.519158	0.448337	0.52557	0.542014	0.452943	0.502718	0.718963	0.512547	0.558841	0.353654	0.425523	0.416029	0.644122	0.437018	0.545667	0.535918	0.362698	0.501267	0.461923	0.552932	0.549231	0.467061	0.547794	0.499861	0.410725	0.461035	0.485524	0.393209	0.465657	0.531262	0.504589	0.688987	0.517611	0.447314	0.598106	0.412773	0.498587	0.509021	0.596541	0.499878
cg08344422	0.341049	0.367367	0.17661	0.527901	0.317842	0.665827	0.180791	0.224039	0.356217	0.472637	0.255594	0.508126	0.372796	0.365321	0.380909	0.723876	0.418404	0.298312	0.350963	0.191279	0.256972	0.491261	0.221701	0.186914	0.35606	0.569832	0.295212	0.56093	0.503233	0.330307	0.274637	0.683566	0.50591	0.222873	0.280853	0.226942	0.571382	0.376504	0.372425	0.29841	0.713259	0.434684	0.319814	0.499499	0.25424	0.350287	0.42603	0.600871	0.331263
cg01606027	0.345083	0.290499	0.222196	0.361511	0.392443	0.403318	0.0742414	0.269756	0.407838	0.400349	0.333547	0.406096	0.351279	0.311039	0.359048	0.554909	0.380047	0.513464	0.20518	0.265684	0.283604	0.547359	0.330831	0.338185	0.307979	0.37256	0.405993	0.327596	0.383562	0.391662	0.327796	0.374191	0.339861	0.200987	0.268451	0.301818	0.190851	0.32539	0.344391	0.387037	0.570607	0.364533	0.266164	0.498345	0.280428	0.339672	0.398022	0.53235	0.359155
cg20282764	0.336292	0.212699	0.160309	0.26149	0.301793	0.348999	0.0670416	0.245031	0.415786	0.330753	0.286107	0.367372	0.361661	0.273037	0.384856	0.289904	0.336062	0.394899	0.229148	0.291559	0.210062	0.413021	0.320877	0.308223	0.273634	0.361919	0.360281	0.286282	0.383076	0.337767	0.349418	0.397684	0.267107	0.204566	0.233633	0.256134	0.190755	0.344376	0.453657	0.364022	0.50818	0.248164	0.241073	0.466596	0.272563	0.330961	0.341963	0.540606	0.370069
cg18036273	0.463048	0.414303	0.325969	0.452239	0.452676	0.692387	0.181709	0.359719	0.472196	0.487485	0.41635	0.503365	0.459819	0.416843	0.591352	0.725087	0.462626	0.611528	0.283225	0.352476	0.362561	0.710007	0.335258	0.438553	0.436319	0.413323	0.480634	0.428902	0.551044	0.498467	0.349714	0.515555	0.47692	0.271376	0.388894	0.508326	0.292464	0.398306	0.44167	0.537837	0.721471	0.465328	0.381756	0.615226	0.404338	0.465073	0.40062	0.644834	0.464809
cg15788038	0.324848	0.291492	0.280142	0.363967	0.385628	0.351887	0.211927	0.231769	0.408501	0.39875	0.323274	0.328935	0.418802	0.245029	0.450356	0.347216	0.303892	0.380171	0.413623	0.296125	0.219024	0.386433	0.229308	0.26863	0.276501	0.512407	0.297071	0.563878	0.403595	0.287417	0.330475	0.656256	0.236916	0.270688	0.264416	0.198955	0.242823	0.355807	0.335017	0.342263	0.706772	0.214264	0.283605	0.478395	0.304488	0.28534	0.350206	0.62502	0.363696
cg17383760	0.684509	0.767398	0.775658	0.722487	0.705392	0.694557	0.858237	0.760223	0.71361	0.723253	0.731834	0.659475	0.694118	0.746798	0.69506	0.535444	0.697282	0.661222	0.852016	0.781074	0.750982	0.617107	0.641159	0.710393	0.7486	0.759897	0.676874	0.69915	0.640288	0.71466	0.740237	0.582949	0.717512	0.770709	0.744847	0.722858	0.810923	0.697502	0.703889	0.715249	0.450349	0.709772	0.675688	0.588738	0.754363	0.712405	0.711598	0.610267	0.671634
cg22706130	0.313268	0.192424	0.196781	0.283353	0.303027	0.304986	0.0947701	0.2034	0.308775	0.316399	0.278449	0.297972	0.287807	0.255383	0.355727	0.446394	0.254726	0.386776	0.177055	0.234151	0.20915	0.421109	0.246795	0.349497	0.260305	0.284633	0.324678	0.289435	0.339356	0.331986	0.306123	0.374452	0.288501	0.218351	0.243467	0.255961	0.210969	0.283331	0.293691	0.337008	0.518695	0.276102	0.261513	0.395698	0.237962	0.246395	0.265257	0.464157	0.293247
cg10699171	0.560045	0.556955	0.611843	0.557784	0.465591	0.49799	0.796097	0.584667	0.431151	0.449202	0.588195	0.448192	0.51062	0.57524	0.473544	0.14535	0.542726	0.413568	0.729031	0.709286	0.523601	0.228672	0.474465	0.553098	0.606052	0.521243	0.476239	0.523283	0.349227	0.504719	0.596543	0.474362	0.568553	0.662402	0.582761	0.54942	0.694909	0.531753	0.572629	0.429679	0.264214	0.425662	0.4646	0.265587	0.526234	0.518452	0.499105	0.311299	0.507528
cg21023025	0.465317	0.368791	0.345638	0.384806	0.488366	0.475814	0.193608	0.303579	0.532065	0.476252	0.459133	0.489773	0.516677	0.414226	0.503868	0.543034	0.460636	0.545981	0.378094	0.430767	0.3768	0.548548	0.46181	0.485135	0.467202	0.285937	0.501283	0.459975	0.527393	0.460355	0.447906	0.535715	0.466924	0.370475	0.373181	0.434307	0.358733	0.454196	0.561283	0.47647	0.656026	0.462263	0.421627	0.582199	0.355171	0.474699	0.425707	0.650384	0.476525
cg05018467	0.372632	0.314024	0.277562	0.419749	0.37673	0.407029	0.130291	0.350554	0.401959	0.394845	0.320354	0.364278	0.310515	0.348874	0.408493	0.483358	0.425692	0.446009	0.198971	0.277873	0.373902	0.499194	0.351994	0.396039	0.336931	0.452606	0.414411	0.393887	0.443565	0.399889	0.330465	0.482857	0.436576	0.320844	0.383	0.398613	0.28909	0.313927	0.325101	0.354162	0.564656	0.403614	0.333391	0.465066	0.272357	0.36158	0.329838	0.463288	0.345524
cg15511120	0.4275	0.398548	0.304926	0.458085	0.471956	0.502705	0.170354	0.42571	0.484153	0.488397	0.418051	0.484759	0.472003	0.413145	0.462972	0.600952	0.464978	0.495273	0.315845	0.368505	0.379613	0.630898	0.393764	0.507027	0.452194	0.326843	0.48349	0.388375	0.505387	0.492049	0.403699	0.508883	0.463562	0.343584	0.421207	0.440438	0.350716	0.410222	0.433349	0.500944	0.669725	0.489498	0.421494	0.579259	0.344775	0.458127	0.438444	0.602734	0.423852
cg07496207	0.528332	0.43449	0.338351	0.493581	0.585392	0.547757	0.158293	0.463321	0.581984	0.526928	0.509196	0.512747	0.523665	0.493922	0.47648	0.686971	0.565432	0.630351	0.359941	0.48439	0.463158	0.731467	0.512124	0.553107	0.538512	0.337336	0.569124	0.429165	0.52213	0.558283	0.405686	0.570899	0.621134	0.390728	0.430434	0.565532	0.414227	0.521301	0.588015	0.575729	0.733888	0.530076	0.48099	0.660206	0.353775	0.559057	0.478383	0.715919	0.602565
cg26458306	0.450209	0.379812	0.300356	0.483648	0.476974	0.534264	0.142343	0.398806	0.514425	0.463496	0.416899	0.479959	0.531187	0.423739	0.505589	0.699668	0.572761	0.534392	0.271537	0.363023	0.388997	0.651292	0.360888	0.512204	0.43229	0.315431	0.505336	0.330166	0.553887	0.51549	0.401424	0.500039	0.511517	0.312054	0.42815	0.480815	0.342832	0.425702	0.437832	0.459628	0.713999	0.481473	0.423165	0.645084	0.364125	0.462031	0.452918	0.650016	0.470534
cg03002526	0.702346	0.804634	0.845227	0.742557	0.69642	0.696597	0.83189	0.696465	0.755103	0.686126	0.737752	0.714449	0.881917	0.755845	0.674851	0.518347	0.698747	0.669343	0.856738	0.791661	0.731965	0.499094	0.749943	0.783032	0.792534	0.672642	0.747636	0.75454	0.718866	0.697468	0.819089	0.701613	0.721055	0.817566	0.814887	0.764823	0.830752	0.781279	0.703587	0.703347	0.555489	0.692276	0.668323	0.604164	0.788162	0.771402	0.68782	0.593548	0.714971
cg07680679	0.316987	0.197514	0.207221	0.285338	0.316622	0.333808	0.101974	0.230467	0.351399	0.317156	0.300791	0.311978	0.264345	0.236034	0.363699	0.492323	0.26704	0.409684	0.192388	0.180187	0.287771	0.448737	0.246409	0.291832	0.244041	0.284573	0.344476	0.256483	0.371103	0.305903	0.213194	0.35823	0.250636	0.196557	0.227595	0.272233	0.133165	0.232778	0.290283	0.339922	0.529396	0.257804	0.28475	0.399683	0.222565	0.291655	0.316669	0.48358	0.292549
cg18145175	0.813961	0.914765	0.908791	0.837109	0.868948	0.816004	0.962043	0.901558	0.841593	0.872842	0.880295	0.786836	0.862226	0.870929	0.781535	0.817685	0.918508	0.742893	0.915955	0.903194	0.922714	0.731622	0.813835	0.846767	0.907219	0.867626	0.773128	0.811546	0.790248	0.811703	0.868469	0.71491	0.921509	0.878839	0.878951	0.9119	0.950569	0.892483	0.82113	0.781913	0.554817	0.835657	0.814829	0.672428	0.887986	0.853434	0.810505	0.64173	0.826817
cg00417826	0.251516	0.180135	0.219755	0.207975	0.282329	0.286755	0.124769	0.126305	0.24846	0.32093	0.250234	0.265719	0.335626	0.164003	0.324289	0.445664	0.170757	0.202051	0.176197	0.181459	0.120397	0.323453	0.156588	0.168009	0.268851	0.366662	0.193335	0.457563	0.357433	0.294608	0.245124	0.519995	0.123105	0.165945	0.204916	0.160695	0.14088	0.224708	0.279919	0.285783	0.512271	0.153364	0.203379	0.394615	0.224531	0.187625	0.208868	0.611499	0.200665
cg06777477	0.47806	0.420526	0.361625	0.494217	0.489609	0.499207	0.281014	0.449314	0.527986	0.524792	0.459215	0.506445	0.550221	0.445728	0.485217	0.635228	0.402365	0.614958	0.358033	0.398028	0.395976	0.629708	0.496819	0.51861	0.449125	0.367989	0.526943	0.480775	0.560471	0.514822	0.454959	0.541267	0.437325	0.406995	0.417736	0.452544	0.379643	0.485824	0.497878	0.513855	0.726106	0.461275	0.447876	0.620862	0.393741	0.481071	0.508718	0.682476	0.5383
cg12327989	0.259254	0.223882	0.149504	0.261061	0.325715	0.342447	0.0492092	0.178806	0.340819	0.29494	0.255865	0.353002	0.32029	0.249225	0.372839	0.350804	0.270501	0.367922	0.172164	0.272347	0.174352	0.386337	0.240438	0.302065	0.272746	0.212881	0.367791	0.369257	0.365482	0.277813	0.282828	0.44797	0.17219	0.147887	0.205247	0.191362	0.153392	0.302554	0.416824	0.404962	0.663113	0.227678	0.272757	0.481396	0.261982	0.305051	0.278264	0.582094	0.34473
cg03266686	0.362678	0.340109	0.311237	0.458644	0.426675	0.435108	0.185368	0.330745	0.427967	0.432689	0.376259	0.343127	0.457555	0.241388	0.446474	0.512445	0.445614	0.377952	0.237945	0.278044	0.286995	0.521341	0.277346	0.355677	0.427898	0.358358	0.240902	0.646871	0.45853	0.411331	0.377656	0.76093	0.411677	0.308438	0.335329	0.33062	0.321196	0.312257	0.338492	0.374529	0.674644	0.343727	0.306279	0.5412	0.199073	0.385143	0.335135	0.73998	0.290663
cg14850570	0.412541	0.356619	0.278939	0.481744	0.455633	0.443745	0.13407	0.387053	0.456615	0.435943	0.377884	0.479744	0.380991	0.388494	0.394231	0.633024	0.413424	0.471078	0.25833	0.314219	0.402397	0.554596	0.421742	0.44431	0.421817	0.310242	0.404665	0.462935	0.417928	0.450785	0.268707	0.698804	0.469147	0.306403	0.388798	0.430589	0.327094	0.383744	0.365259	0.431192	0.674902	0.473653	0.389095	0.528487	0.372467	0.468344	0.39049	0.634467	0.463272
cg18279004	0.596028	0.570227	0.481962	0.605908	0.641745	0.619902	0.261279	0.572678	0.733195	0.643643	0.58303	0.690396	0.619312	0.556786	0.606072	0.806902	0.620509	0.724149	0.405131	0.530594	0.53041	0.819987	0.581559	0.658684	0.601208	0.390692	0.61832	0.533283	0.712819	0.637557	0.527425	0.643694	0.667674	0.524833	0.558719	0.564617	0.441396	0.605938	0.660677	0.600254	0.832539	0.639333	0.583497	0.766944	0.468548	0.654356	0.672163	0.795917	0.648235
cg24425149	0.489587	0.387864	0.374426	0.399684	0.524329	0.49875	0.311799	0.425681	0.491083	0.447571	0.457148	0.504208	0.50731	0.444697	0.521171	0.484148	0.470665	0.502645	0.378446	0.456903	0.384737	0.498473	0.453668	0.494148	0.449521	0.462564	0.543914	0.490327	0.525577	0.49436	0.485769	0.543318	0.450789	0.452545	0.471739	0.459659	0.379197	0.518122	0.568305	0.477703	0.665206	0.408387	0.440808	0.580069	0.471648	0.485654	0.496147	0.575602	0.541741
cg16334524	0.682244	0.649119	0.629582	0.705422	0.681492	0.727807	0.476188	0.631149	0.741077	0.683819	0.696281	0.694624	0.714882	0.642865	0.646239	0.856558	0.673866	0.674365	0.588609	0.611583	0.625816	0.724996	0.677852	0.695798	0.704652	0.649677	0.64073	0.824922	0.792263	0.718778	0.684419	0.833145	0.631432	0.651951	0.685201	0.68555	0.628967	0.724588	0.791113	0.686936	0.870666	0.641061	0.609622	0.811091	0.579421	0.685868	0.616221	0.877012	0.75818
cg19974636	0.622521	0.674589	0.698926	0.635705	0.606558	0.600628	0.777026	0.591514	0.593024	0.633436	0.648921	0.617106	0.592596	0.669027	0.703416	0.382406	0.638495	0.550735	0.766942	0.711853	0.651547	0.391822	0.608011	0.572759	0.695498	0.650427	0.606116	0.614004	0.51881	0.55295	0.679406	0.585496	0.681363	0.76282	0.688083	0.689866	0.766718	0.646479	0.616407	0.55779	0.378592	0.598003	0.606311	0.438526	0.607713	0.647313	0.600214	0.486621	0.581755
cg03699958	0.252049	0.192487	0.177208	0.270791	0.266353	0.308921	0.0826013	0.174522	0.24927	0.25476	0.2297	0.283903	0.345589	0.185094	0.292983	0.401538	0.236148	0.25757	0.166304	0.192043	0.196119	0.351354	0.17611	0.24915	0.300734	0.302982	0.232765	0.357048	0.407813	0.299842	0.22987	0.462121	0.198223	0.194409	0.236719	0.243931	0.190525	0.227873	0.228325	0.293269	0.507084	0.219507	0.195961	0.356184	0.201406	0.243008	0.200529	0.506448	0.21297
cg16134741	0.601683	0.511633	0.454149	0.5585	0.582744	0.621551	0.443703	0.492046	0.60089	0.597485	0.552995	0.613081	0.595598	0.569907	0.623774	0.668092	0.545639	0.671108	0.521096	0.525333	0.535946	0.71001	0.583698	0.590335	0.58831	0.513084	0.566895	0.573291	0.630653	0.605376	0.694599	0.594174	0.47733	0.462155	0.589722	0.524641	0.451951	0.603688	0.637529	0.599938	0.810547	0.566201	0.535492	0.708601	0.581995	0.564885	0.536127	0.770707	0.584744
cg09837656	0.482401	0.408229	0.385552	0.481803	0.496324	0.533995	0.275054	0.374092	0.444631	0.506153	0.431858	0.544346	0.504697	0.386159	0.455075	0.688294	0.528501	0.538365	0.418755	0.395335	0.458065	0.615912	0.444276	0.560834	0.497889	0.394588	0.500832	0.462604	0.549615	0.53038	0.550797	0.508349	0.465816	0.411338	0.44217	0.464314	0.396066	0.460725	0.488646	0.528582	0.682523	0.47064	0.447637	0.620464	0.386389	0.509592	0.473332	0.602271	0.504868
cg24651536	0.57787	0.550849	0.527796	0.605749	0.616238	0.598592	0.40102	0.372032	0.662811	0.578773	0.503465	0.770258	0.640697	0.581131	0.651389	0.66321	0.636952	0.697416	0.554385	0.594072	0.326042	0.690468	0.523941	0.522971	0.639312	0.579681	0.635145	0.541792	0.648246	0.627751	0.67335	0.602895	0.526443	0.502741	0.523813	0.494006	0.506824	0.576905	0.6173	0.631312	0.75236	0.567425	0.521136	0.7078	0.558328	0.617778	0.549339	0.740799	0.65756
cg05653335	0.228702	0.138735	0.140462	0.162429	0.215582	0.158221	0.0981647	0.155574	0.24476	0.201714	0.19347	0.215212	0.219511	0.200937	0.235632	0.110179	0.246903	0.237779	0.188604	0.241245	0.113705	0.231054	0.239173	0.202141	0.200198	0.235065	0.259376	0.229462	0.253391	0.210695	0.211513	0.287575	0.170833	0.178819	0.174589	0.169319	0.120482	0.24714	0.305919	0.238411	0.375023	0.141265	0.202297	0.290041	0.178198	0.195872	0.202696	0.34761	0.274485
cg13113206	0.748153	0.83991	0.838527	0.792468	0.749138	0.778235	0.896267	0.814832	0.728973	0.805119	0.832296	0.733553	0.77597	0.78897	0.719912	0.771497	0.790475	0.684396	0.862068	0.801345	0.821651	0.642315	0.777608	0.75447	0.844078	0.808045	0.750596	0.739441	0.71848	0.776571	0.783703	0.718307	0.8306	0.83002	0.803343	0.832079	0.884998	0.769484	0.722057	0.702037	0.541322	0.819473	0.747571	0.639414	0.800268	0.794817	0.73829	0.601195	0.764567
cg02730804	0.71186	0.865422	0.870433	0.786602	0.749742	0.725698	0.928513	0.820507	0.756069	0.786199	0.813009	0.746145	0.775544	0.820963	0.754691	0.672931	0.76382	0.69642	0.87841	0.83123	0.84947	0.568072	0.806997	0.762236	0.858301	0.785989	0.767483	0.77384	0.682079	0.756713	0.826149	0.690697	0.84448	0.830569	0.830958	0.81292	0.859811	0.825898	0.762666	0.724569	0.547177	0.804659	0.786668	0.657065	0.83506	0.794583	0.755013	0.659647	0.752535
cg18315298	0.224576	0.201253	0.182955	0.25951	0.254723	0.2697	0.0712856	0.152905	0.225079	0.238103	0.192371	0.201134	0.211728	0.235375	0.303951	0.332784	0.319958	0.363345	0.136034	0.191275	0.168148	0.340223	0.222272	0.250947	0.25235	0.141089	0.258538	0.249005	0.283299	0.189663	0.21114	0.289838	0.157248	0.152439	0.137562	0.168873	0.127585	0.190351	0.247231	0.215755	0.485162	0.214862	0.219619	0.338443	0.198097	0.242528	0.24601	0.40982	0.337488
cg17777759	0.427011	0.37075	0.275012	0.404599	0.513856	0.437448	0.213632	0.38896	0.508832	0.472659	0.402441	0.464031	0.510426	0.427869	0.475077	0.464692	0.480312	0.526574	0.344586	0.449254	0.385825	0.561019	0.432989	0.458503	0.442938	0.361719	0.502529	0.408051	0.508039	0.450187	0.461731	0.525577	0.40548	0.333192	0.36442	0.388332	0.323893	0.459366	0.597979	0.463951	0.742441	0.388378	0.45454	0.683829	0.406694	0.486843	0.459765	0.649556	0.542847
cg04413138	0.663377	0.650327	0.594223	0.613003	0.70465	0.778545	0.46306	0.498488	0.795241	0.79235	0.708539	0.778112	0.783611	0.55762	0.865329	0.825005	0.617716	0.710325	0.649972	0.582364	0.54555	0.855757	0.430905	0.698059	0.682697	0.728425	0.550825	0.801057	0.780952	0.696832	0.732764	0.874598	0.423091	0.567801	0.421864	0.646552	0.552402	0.682049	0.724788	0.710441	0.892509	0.486836	0.59743	0.788121	0.719734	0.623761	0.53519	0.894302	0.774617
cg10368514	0.428777	0.42778	0.388207	0.487657	0.521676	0.498719	0.278361	0.391018	0.433186	0.456265	0.390834	0.404459	0.419844	0.365799	0.385801	0.585769	0.416913	0.519575	0.297011	0.378992	0.497413	0.524521	0.413206	0.494086	0.436676	0.281373	0.349578	0.607856	0.444809	0.450906	0.398983	0.723519	0.438958	0.434624	0.413074	0.422449	0.367957	0.431087	0.378047	0.660295	0.646448	0.440514	0.424226	0.549907	0.36333	0.452134	0.437314	0.717767	0.434521
cg17406456	0.514277	0.474868	0.428731	0.520651	0.586158	0.560034	0.265596	0.459692	0.566095	0.529021	0.494045	0.533109	0.525475	0.491996	0.550775	0.7469	0.559249	0.603944	0.387856	0.42386	0.447198	0.697029	0.479235	0.528408	0.524111	0.584023	0.592916	0.465701	0.607081	0.56175	0.497711	0.572715	0.567985	0.434252	0.49394	0.546362	0.403375	0.468201	0.497378	0.549085	0.722855	0.510516	0.497358	0.666233	0.443054	0.564683	0.507569	0.696937	0.522902
cg10535590	0.131894	0.157186	0.127719	0.156431	0.215599	0.170332	0.063049	0.108825	0.153957	0.182687	0.136702	0.148412	0.177332	0.111047	0.162072	0.226258	0.167423	0.200566	0.0496114	0.0911492	0.0961981	0.250405	0.0891032	0.185853	0.146508	0.0737907	0.110351	0.285914	0.167781	0.198227	0.114582	0.50304	0.115704	0.110976	0.0983113	0.123821	0.0768827	0.154868	0.195698	0.152609	0.478897	0.154734	0.103349	0.270047	0.0865621	0.135979	0.158211	0.474221	0.147153
cg27415382	0.519017	0.416192	0.37257	0.515217	0.534122	0.51546	0.13767	0.343814	0.57127	0.594162	0.48622	0.587111	0.580118	0.426871	0.613162	0.36084	0.55512	0.713487	0.294856	0.462512	0.381613	0.761334	0.399811	0.521962	0.505923	0.442779	0.470783	0.446056	0.57738	0.529465	0.415494	0.520723	0.557119	0.410601	0.380957	0.465533	0.346435	0.485288	0.59295	0.572837	0.780733	0.463281	0.459909	0.649335	0.432096	0.507921	0.530423	0.675595	0.554266
cg24932920	0.337463	0.286914	0.207652	0.342653	0.382631	0.376478	0.113286	0.278081	0.400864	0.350152	0.349349	0.409468	0.356218	0.296132	0.375252	0.472168	0.381326	0.428641	0.244467	0.280544	0.273493	0.532642	0.34041	0.3757	0.337074	0.276726	0.375013	0.319619	0.43541	0.394431	0.314021	0.385434	0.318842	0.29047	0.298555	0.33544	0.244498	0.345781	0.362841	0.387777	0.518453	0.357813	0.318828	0.45913	0.28881	0.342432	0.33928	0.488566	0.387583
cg26277606	0.608616	0.605168	0.546053	0.651569	0.602781	0.607684	0.709257	0.620846	0.536114	0.646347	0.644569	0.542425	0.446388	0.67598	0.501671	0.57072	0.506864	0.732886	0.680255	0.680869	0.683753	0.557641	0.554207	0.630837	0.627576	0.580778	0.637926	0.557927	0.428846	0.563746	0.657609	0.558697	0.769354	0.675029	0.673749	0.650469	0.742635	0.619473	0.448245	0.643896	0.387457	0.695808	0.525152	0.462642	0.655131	0.647465	0.573139	0.412651	0.565584
cg24568311	0.542495	0.62365	0.521878	0.634111	0.588143	0.62133	0.356975	0.512086	0.690275	0.663418	0.639339	0.614544	0.622271	0.532898	0.620434	0.747487	0.65157	0.667491	0.419557	0.538794	0.575811	0.765976	0.589922	0.566527	0.584086	0.64297	0.624203	0.536164	0.651067	0.55921	0.527042	0.704711	0.653751	0.515091	0.560888	0.590939	0.49267	0.663438	0.527076	0.604836	0.743546	0.611073	0.564218	0.736015	0.50589	0.652606	0.635912	0.743658	0.620902
cg10861637	0.43422	0.395398	0.42629	0.402278	0.504189	0.469696	0.272713	0.333586	0.490672	0.500562	0.435919	0.493166	0.463535	0.385207	0.460575	0.624022	0.387005	0.460016	0.362364	0.386916	0.340251	0.53825	0.346266	0.452629	0.414918	0.491297	0.442773	0.600532	0.516251	0.404181	0.407525	0.693452	0.364671	0.350282	0.403857	0.383425	0.354295	0.399726	0.446134	0.473435	0.711516	0.369479	0.366903	0.601137	0.396109	0.411921	0.38642	0.724685	0.431146
cg21242123	0.183406	0.149184	0.156828	0.199679	0.211662	0.228769	0.0491152	0.105058	0.240933	0.249592	0.154251	0.215059	0.33828	0.104892	0.278361	0.414336	0.178266	0.140616	0.097521	0.104066	0.0855386	0.36772	0.106914	0.157349	0.208094	0.338558	0.131058	0.466428	0.363277	0.264045	0.213385	0.514521	0.127646	0.107594	0.129283	0.132466	0.0879077	0.174967	0.177868	0.21363	0.591264	0.130514	0.127724	0.355952	0.106671	0.132896	0.132594	0.592493	0.157672
cg26093789	0.362038	0.232397	0.203046	0.308061	0.341846	0.366636	0.14278	0.294188	0.367031	0.307128	0.299388	0.311837	0.356225	0.275834	0.364286	0.385049	0.338452	0.499175	0.19265	0.242891	0.202921	0.479942	0.188634	0.331924	0.277274	0.276003	0.334986	0.254834	0.404834	0.356903	0.302763	0.38365	0.239981	0.211704	0.260566	0.308323	0.205748	0.321605	0.360529	0.363553	0.535424	0.345407	0.252761	0.439713	0.271283	0.343104	0.326402	0.467052	0.364789
cg21794396	0.724026	0.853593	0.811519	0.76906	0.796079	0.714984	0.87517	0.755593	0.822959	0.786934	0.773853	0.749176	0.745462	0.768891	0.695014	0.645599	0.653351	0.710668	0.845858	0.792208	0.788461	0.627548	0.63423	0.771932	0.810744	0.623745	0.725106	0.723654	0.704081	0.765916	0.788376	0.690408	0.844249	0.820258	0.843735	0.82187	0.856015	0.798133	0.717683	0.713163	0.472097	0.743735	0.729017	0.612156	0.786387	0.746561	0.723002	0.566215	0.737635
cg25499678	0.536528	0.50394	0.414043	0.53212	0.62955	0.55313	0.322244	0.59159	0.597463	0.593215	0.504403	0.58514	0.63384	0.497414	0.548126	0.754029	0.638566	0.6705	0.360979	0.509936	0.540589	0.771117	0.57326	0.619225	0.498113	0.527276	0.597377	0.361572	0.620297	0.624763	0.456486	0.548434	0.575512	0.428281	0.524687	0.553122	0.446579	0.553169	0.629584	0.608141	0.709789	0.622285	0.583304	0.697829	0.513513	0.523153	0.55801	0.690144	0.632429
cg07346905	0.211189	0.125467	0.123642	0.185835	0.225926	0.239981	0.0640365	0.0955374	0.269182	0.186009	0.157999	0.20384	0.217481	0.178684	0.336882	0.215387	0.287344	0.251139	0.106781	0.155238	0.0803206	0.219361	0.1965	0.294291	0.154362	0.132041	0.273419	0.213932	0.283927	0.246218	0.159368	0.302307	0.14448	0.062249	0.137489	0.118575	0.087657	0.239145	0.224799	0.244093	0.461539	0.126254	0.219296	0.350078	0.14007	0.16179	0.187166	0.480211	0.195485
cg08151621	0.467349	0.388937	0.426795	0.461676	0.476852	0.500432	0.255369	0.395513	0.441205	0.482301	0.450229	0.473465	0.471141	0.425133	0.464599	0.547316	0.532642	0.538043	0.412887	0.372883	0.309866	0.560521	0.44131	0.420647	0.496747	0.536335	0.49414	0.580697	0.537697	0.499666	0.480417	0.59489	0.458161	0.438653	0.458856	0.366584	0.370992	0.400744	0.458986	0.490316	0.681722	0.384298	0.474372	0.615287	0.44222	0.452329	0.475574	0.610126	0.456943
cg06052122	0.659361	0.585944	0.521056	0.669802	0.653895	0.724066	0.357413	0.56577	0.745009	0.677782	0.613895	0.66982	0.693773	0.564907	0.652676	0.903581	0.721476	0.766912	0.555247	0.542561	0.527122	0.865592	0.686711	0.692825	0.633637	0.593602	0.628507	0.666458	0.716913	0.648359	0.635488	0.768013	0.698114	0.5091	0.585576	0.67681	0.467939	0.611188	0.601258	0.654595	0.830104	0.666661	0.612133	0.81403	0.59422	0.662369	0.637151	0.808692	0.639862
cg04794138	0.633266	0.631987	0.595962	0.616491	0.696481	0.674862	0.508136	0.523341	0.7251	0.71429	0.626025	0.678782	0.71197	0.642249	0.638902	0.660409	0.701342	0.716321	0.551816	0.639338	0.554929	0.718581	0.643566	0.657027	0.614106	0.684736	0.680374	0.735722	0.71336	0.647561	0.647888	0.783361	0.583612	0.585585	0.640469	0.63438	0.561761	0.702278	0.752861	0.684412	0.884441	0.577124	0.65059	0.804029	0.581506	0.710392	0.699869	0.845937	0.734222
cg12995697	0.788798	0.888977	0.850929	0.803134	0.807089	0.819183	0.941635	0.854658	0.809164	0.814438	0.849197	0.785849	0.841033	0.851571	0.781705	0.728538	0.855639	0.730823	0.87814	0.867437	0.879925	0.703499	0.843236	0.804084	0.833766	0.896156	0.780662	0.790855	0.804288	0.817658	0.867131	0.728865	0.896941	0.873221	0.868317	0.858665	0.918326	0.869	0.790796	0.748822	0.598055	0.804436	0.791641	0.681228	0.87649	0.838916	0.797275	0.697932	0.799392
cg17624661	0.424727	0.337999	0.318243	0.349637	0.491278	0.474373	0.179993	0.335626	0.511052	0.443274	0.36752	0.434734	0.487779	0.400425	0.464656	0.429953	0.550037	0.473344	0.301276	0.351703	0.267872	0.529601	0.371877	0.422109	0.401368	0.356886	0.43799	0.444791	0.49695	0.43209	0.40851	0.532938	0.371665	0.378408	0.349868	0.428373	0.278554	0.455228	0.463076	0.446196	0.688724	0.382958	0.398354	0.577444	0.324016	0.425855	0.425311	0.6462	0.422956
cg04202597	0.572286	0.510812	0.380801	0.570492	0.622932	0.595877	0.215742	0.469791	0.648704	0.633035	0.546865	0.627044	0.635934	0.504857	0.613722	0.799599	0.568299	0.655124	0.418273	0.477151	0.465315	0.731112	0.632926	0.593779	0.554356	0.55724	0.587249	0.549854	0.651114	0.595186	0.509982	0.669358	0.57183	0.43661	0.515616	0.552315	0.383461	0.61486	0.62887	0.630167	0.866679	0.57021	0.517427	0.747519	0.522597	0.602243	0.603939	0.734452	0.587064
cg07728865	0.757772	0.845054	0.819558	0.789156	0.811569	0.689506	0.896959	0.826318	0.814388	0.817116	0.826422	0.77462	0.859048	0.788393	0.764808	0.710795	0.833185	0.692002	0.833132	0.839593	0.829622	0.681292	0.726945	0.761069	0.830431	0.842169	0.744312	0.781108	0.776688	0.751628	0.84416	0.702076	0.810363	0.81828	0.821139	0.790195	0.862781	0.829848	0.752868	0.747448	0.607165	0.768629	0.72996	0.668182	0.822072	0.816872	0.748396	0.690705	0.770232
cg09837911	0.643484	0.791473	0.767557	0.681102	0.643866	0.635925	0.81216	0.743272	0.700775	0.662049	0.70664	0.671243	0.657796	0.743352	0.643903	0.37728	0.694109	0.577893	0.815236	0.789993	0.762641	0.544291	0.67989	0.717824	0.696753	0.734759	0.716115	0.648041	0.666551	0.645222	0.783318	0.589901	0.685902	0.815439	0.80572	0.713545	0.774623	0.809496	0.720947	0.688099	0.487335	0.660109	0.639874	0.54271	0.721491	0.655879	0.688512	0.570635	0.69926
cg08918508	0.488141	0.484693	0.4277	0.506312	0.508111	0.588754	0.264064	0.414756	0.544058	0.515563	0.468396	0.570658	0.536951	0.440006	0.606583	0.715163	0.459221	0.594073	0.349228	0.491983	0.434306	0.701071	0.399894	0.463585	0.56351	0.423668	0.407856	0.537858	0.527885	0.526632	0.577847	0.734692	0.405212	0.425947	0.355414	0.491428	0.377774	0.521308	0.510288	0.516118	0.774167	0.482567	0.478644	0.658028	0.371079	0.578301	0.495351	0.753205	0.577695
cg20786822	0.642922	0.750706	0.766645	0.640891	0.69285	0.574258	0.861973	0.733085	0.632844	0.681065	0.705431	0.648926	0.646182	0.713	0.689886	0.502435	0.706725	0.558909	0.760505	0.746548	0.705477	0.531908	0.643889	0.688968	0.696733	0.730898	0.654997	0.702201	0.652673	0.646238	0.694693	0.648307	0.677184	0.763269	0.729971	0.672138	0.759095	0.681354	0.66872	0.58717	0.397029	0.653794	0.614173	0.504123	0.753135	0.610369	0.689369	0.446318	0.645712
cg22800543	0.62086	0.597937	0.592531	0.702798	0.656499	0.675882	0.421182	0.594187	0.653955	0.612538	0.595481	0.638827	0.598598	0.568114	0.627902	0.840363	0.558663	0.722314	0.573543	0.540417	0.568341	0.759431	0.545978	0.6345	0.607862	0.585821	0.532026	0.787791	0.597403	0.643457	0.519253	0.898967	0.581136	0.529546	0.495867	0.604053	0.506338	0.547896	0.592613	0.591003	0.878517	0.6575	0.551578	0.761771	0.555593	0.619906	0.590375	0.87744	0.573358
cg00998686	0.66927	0.770223	0.793263	0.700394	0.690659	0.669557	0.848792	0.707485	0.691425	0.727459	0.760291	0.705576	0.779435	0.730476	0.657783	0.517918	0.717502	0.589779	0.835694	0.737595	0.739954	0.530041	0.709435	0.664066	0.70959	0.866264	0.656137	0.757481	0.634442	0.719156	0.786709	0.645664	0.666039	0.782887	0.783351	0.721957	0.791013	0.719593	0.634914	0.681459	0.495661	0.666971	0.613314	0.584462	0.793491	0.689923	0.71056	0.573445	0.706676
cg11722578	0.306348	0.274178	0.227229	0.306189	0.29696	0.347726	0.129468	0.292702	0.328854	0.217907	0.228257	0.277369	0.236772	0.263851	0.337885	0.187932	0.27296	0.373955	0.203703	0.273804	0.30314	0.395356	0.343113	0.357912	0.286139	0.157757	0.293201	0.312893	0.277255	0.246454	0.258101	0.380883	0.274686	0.254608	0.311931	0.303028	0.21237	0.255194	0.357074	0.279184	0.562124	0.222142	0.302331	0.390467	0.156258	0.240467	0.302863	0.486099	0.292946
cg07145783	0.432066	0.470113	0.449114	0.507518	0.50375	0.480048	0.285404	0.361071	0.48272	0.48904	0.440231	0.432628	0.534187	0.401667	0.421162	0.713184	0.426635	0.421835	0.390029	0.397147	0.368848	0.568518	0.412293	0.461127	0.49127	0.386566	0.385025	0.675034	0.507543	0.501997	0.431341	0.832232	0.450557	0.365566	0.426691	0.420452	0.346795	0.466173	0.47815	0.47076	0.758985	0.489861	0.433258	0.598282	0.375567	0.464493	0.432279	0.769609	0.386763
cg18117288	0.364834	0.325248	0.263934	0.3768	0.420012	0.448508	0.152495	0.314275	0.417623	0.394436	0.381036	0.432562	0.40937	0.347048	0.415702	0.606435	0.376147	0.505907	0.228609	0.275946	0.371775	0.518183	0.280402	0.446747	0.384802	0.205228	0.402564	0.309486	0.403103	0.462405	0.325552	0.442229	0.417475	0.294859	0.319047	0.365475	0.265999	0.322889	0.373286	0.396929	0.615321	0.411866	0.34431	0.496108	0.336452	0.378041	0.356404	0.567918	0.404043
cg06946021	0.656486	0.594334	0.65501	0.657436	0.659115	0.676863	0.49613	0.643089	0.732053	0.66474	0.651922	0.718875	0.677221	0.638637	0.698605	0.91919	0.644351	0.680649	0.610202	0.574249	0.53414	0.770516	0.570221	0.613189	0.650767	0.680993	0.662393	0.713674	0.674188	0.686746	0.670316	0.790164	0.598277	0.583111	0.618548	0.59746	0.541753	0.638281	0.611786	0.685989	0.839338	0.643155	0.560203	0.784333	0.599419	0.618258	0.717942	0.83563	0.679181
cg19423170	0.64724	0.609856	0.382822	0.553989	0.774949	0.742735	0.244644	0.701687	0.750572	0.709169	0.562738	0.655633	0.645363	0.608636	0.677425	0.886223	0.652287	0.739654	0.413149	0.614606	0.558379	0.894949	0.590873	0.650225	0.709716	0.493265	0.784254	0.569893	0.746226	0.619353	0.500871	0.771635	0.68237	0.472276	0.641944	0.606498	0.485307	0.73045	0.838077	0.650531	0.863858	0.66228	0.656702	0.821044	0.467163	0.702821	0.73106	0.800934	0.692345
cg27527262	0.480106	0.490327	0.529409	0.520126	0.534986	0.499814	0.39082	0.461629	0.516725	0.435769	0.414513	0.52457	0.548397	0.490156	0.591272	0.432505	0.489493	0.523003	0.518068	0.537609	0.363201	0.544384	0.421637	0.48158	0.526191	0.536412	0.534878	0.578365	0.557639	0.470747	0.539582	0.659826	0.366804	0.424979	0.49546	0.40374	0.407295	0.475165	0.456044	0.536759	0.742318	0.365733	0.416873	0.638362	0.540657	0.417795	0.511288	0.648523	0.535305
cg13353542	0.495165	0.524756	0.581631	0.521967	0.445065	0.472071	0.678818	0.518962	0.478279	0.470034	0.545561	0.444937	0.508101	0.522681	0.438974	0.238391	0.469049	0.369553	0.623485	0.549103	0.542644	0.236219	0.43856	0.463137	0.546604	0.579559	0.483347	0.51867	0.41587	0.496665	0.556537	0.494497	0.529334	0.609123	0.573395	0.555429	0.61757	0.467625	0.429346	0.408815	0.246437	0.430652	0.440394	0.336026	0.516794	0.460656	0.487968	0.369339	0.466342
cg05052463	0.680337	0.837253	0.823495	0.753079	0.715169	0.661982	0.871184	0.78424	0.676507	0.715587	0.762469	0.642855	0.687359	0.764932	0.668556	0.655313	0.718201	0.625325	0.826645	0.792258	0.787779	0.525525	0.738026	0.709753	0.829775	0.789677	0.731045	0.666977	0.619978	0.71771	0.708474	0.655553	0.833301	0.818835	0.791534	0.79163	0.870613	0.704462	0.731723	0.609604	0.405961	0.703462	0.67495	0.540794	0.750185	0.74192	0.702446	0.512397	0.700906
cg07554758	0.378962	0.437632	0.489433	0.288933	0.433685	0.403378	0.254294	0.264055	0.314649	0.552247	0.510594	0.406629	0.465363	0.329813	0.539792	0.524814	0.383905	0.398399	0.38064	0.369346	0.107794	0.469858	0.231603	0.350267	0.397002	0.352423	0.351124	0.62526	0.449596	0.406116	0.45366	0.69843	0.254568	0.271585	0.244501	0.233185	0.343991	0.341564	0.465518	0.477902	0.688913	0.283456	0.35295	0.567754	0.349723	0.330447	0.459535	0.687178	0.38188
cg09505426	0.663648	0.790637	0.674295	0.753293	0.719623	0.739599	0.736149	0.740035	0.733062	0.759953	0.785284	0.650796	0.693655	0.726344	0.629304	0.66789	0.690717	0.657761	0.831691	0.673733	0.712065	0.623911	0.694462	0.744725	0.713874	0.716806	0.672019	0.65479	0.692408	0.700739	0.718161	0.658124	0.75596	0.758674	0.718124	0.778273	0.766904	0.665878	0.520273	0.691937	0.572144	0.729293	0.672038	0.585403	0.727628	0.717331	0.679785	0.639656	0.666622
cg09329524	0.458663	0.343401	0.299415	0.390628	0.474509	0.502696	0.134677	0.34057	0.545494	0.470629	0.429785	0.486979	0.469713	0.380646	0.511444	0.684232	0.517627	0.543264	0.294805	0.326569	0.280463	0.616336	0.447388	0.433803	0.348821	0.455789	0.491417	0.438339	0.553725	0.489952	0.386618	0.541396	0.345603	0.297875	0.364842	0.376883	0.216447	0.433861	0.463983	0.50555	0.780464	0.380095	0.375786	0.653931	0.333882	0.447142	0.469379	0.715713	0.488074
cg24386507	0.169046	0.343734	0.224035	0.209408	0.274488	0.311634	0.0789025	0.175199	0.344864	0.30409	0.162017	0.261822	0.245935	0.223351	0.285778	0.430069	0.232954	0.25085	0.101215	0.177118	0.218409	0.374294	0.0916601	0.24897	0.200421	0.30781	0.201253	0.450297	0.276368	0.269916	0.23806	0.640623	0.244979	0.166598	0.17127	0.160227	0.229655	0.251858	0.357112	0.202452	0.422791	0.321772	0.236905	0.439495	0.156038	0.277521	0.152223	0.542691	0.278402
cg22765299	0.734314	0.789882	0.827933	0.720034	0.720381	0.712972	0.915739	0.769696	0.729314	0.79943	0.763599	0.691929	0.748668	0.75416	0.683318	0.605478	0.704913	0.626885	0.829987	0.861817	0.778025	0.568584	0.678772	0.728629	0.804346	0.709806	0.69708	0.721018	0.68237	0.747716	0.770189	0.655458	0.73076	0.809801	0.787284	0.734732	0.823453	0.795221	0.66199	0.681937	0.50237	0.719291	0.679683	0.579673	0.807843	0.713452	0.717061	0.553795	0.696798
cg27058497	0.401438	0.412899	0.385088	0.380201	0.353128	0.387898	0.558273	0.388256	0.303306	0.359075	0.459834	0.298014	0.403411	0.435507	0.41011	0.163799	0.383975	0.341611	0.599826	0.424458	0.445598	0.158548	0.426871	0.405598	0.418622	0.430369	0.374925	0.32739	0.286547	0.406972	0.444897	0.251066	0.4274	0.540041	0.47147	0.441997	0.504075	0.437579	0.383283	0.308256	0.205728	0.329022	0.347503	0.218359	0.442283	0.358728	0.376992	0.205662	0.293282
cg19405484	0.342242	0.16768	0.157688	0.247976	0.314468	0.324763	0.0966156	0.218613	0.34745	0.276438	0.22928	0.327504	0.355565	0.2494	0.324073	0.350434	0.281921	0.390346	0.18718	0.254618	0.156183	0.353744	0.226406	0.325381	0.255298	0.186995	0.320566	0.351492	0.377182	0.296816	0.248265	0.388197	0.156102	0.187057	0.227062	0.178416	0.124805	0.304704	0.378672	0.330345	0.624774	0.179566	0.269707	0.47361	0.241116	0.270861	0.266091	0.539027	0.376993
cg19513950	0.584867	0.510977	0.450183	0.588328	0.625705	0.599615	0.279062	0.522639	0.672244	0.62125	0.550077	0.630474	0.621672	0.55651	0.587522	0.755156	0.609758	0.686262	0.435697	0.456705	0.49377	0.731951	0.666119	0.564562	0.581136	0.570959	0.587098	0.521484	0.671468	0.616493	0.585365	0.629056	0.584599	0.502631	0.545103	0.576899	0.469043	0.572002	0.633595	0.614548	0.78513	0.620257	0.48112	0.785001	0.490773	0.656585	0.598705	0.779511	0.606235
cg18409999	0.258975	0.173273	0.181152	0.221403	0.228481	0.323082	0.0731995	0.222101	0.268365	0.249874	0.233112	0.292414	0.315025	0.22766	0.250668	0.31385	0.219288	0.330105	0.186462	0.213255	0.214417	0.344902	0.294149	0.283286	0.27342	0.23765	0.333983	0.227949	0.297693	0.297033	0.235836	0.342287	0.259705	0.187902	0.194289	0.222539	0.154107	0.236916	0.236117	0.318926	0.442471	0.264849	0.242061	0.360573	0.175158	0.275047	0.235715	0.432904	0.223945
cg22523050	0.536751	0.457887	0.395048	0.476759	0.584982	0.579946	0.242059	0.399183	0.617459	0.564265	0.466317	0.577999	0.594289	0.482823	0.564325	0.652735	0.583134	0.603078	0.355402	0.408367	0.430148	0.70707	0.481007	0.539185	0.499248	0.473162	0.541033	0.43906	0.601972	0.56707	0.486123	0.621518	0.488085	0.39801	0.484689	0.524259	0.34777	0.534636	0.522329	0.544057	0.754713	0.500292	0.417812	0.692083	0.459208	0.494416	0.541998	0.699442	0.537439
cg17658888	0.384891	0.301254	0.273393	0.392614	0.367848	0.399691	0.157123	0.346396	0.378576	0.395402	0.36249	0.40814	0.373459	0.36546	0.385377	0.565973	0.405284	0.477119	0.260824	0.295314	0.325997	0.514952	0.360983	0.465217	0.394842	0.179106	0.415526	0.31537	0.431288	0.427682	0.312684	0.436947	0.416658	0.311169	0.366156	0.365203	0.307807	0.33021	0.414508	0.404085	0.551096	0.433088	0.384115	0.492456	0.308475	0.40782	0.355907	0.542186	0.386857
cg01329475	0.51471	0.492817	0.406605	0.552625	0.546599	0.582546	0.262883	0.492712	0.606385	0.577232	0.495523	0.588445	0.533884	0.510153	0.558869	0.786682	0.488661	0.62236	0.375233	0.459719	0.479415	0.721662	0.474338	0.59143	0.530017	0.356132	0.558294	0.457385	0.606548	0.522165	0.475044	0.622581	0.622117	0.435889	0.541636	0.528602	0.406486	0.496868	0.471805	0.532964	0.74486	0.540506	0.470595	0.694428	0.460876	0.613895	0.530602	0.697975	0.511661
cg13776906	0.504093	0.521213	0.370106	0.572037	0.530971	0.634975	0.191473	0.489805	0.596024	0.600608	0.51455	0.589529	0.565744	0.438546	0.517165	0.821647	0.562864	0.655893	0.457884	0.382867	0.482033	0.806164	0.439985	0.557267	0.512373	0.54107	0.495116	0.535788	0.64185	0.546543	0.552865	0.693982	0.484586	0.356725	0.452244	0.498295	0.431792	0.473378	0.501954	0.578537	0.76013	0.544966	0.458729	0.65979	0.518795	0.558284	0.485309	0.749616	0.558094
cg15626881	0.295013	0.23979	0.241892	0.282766	0.399219	0.37345	0.103166	0.225581	0.339531	0.362333	0.232229	0.282866	0.365083	0.164926	0.332831	0.508403	0.243852	0.266784	0.200767	0.378466	0.172364	0.433352	0.230732	0.258657	0.279768	0.332593	0.20948	0.636145	0.423041	0.301656	0.267485	0.720937	0.260702	0.188114	0.18431	0.268146	0.150704	0.293479	0.282417	0.276452	0.692282	0.249526	0.226498	0.455916	0.162277	0.242177	0.222012	0.746171	0.24527
cg24573175	0.43919	0.444631	0.490429	0.426088	0.414708	0.408163	0.58246	0.446361	0.376794	0.40673	0.460585	0.383649	0.422693	0.457495	0.418542	0.201736	0.423819	0.366337	0.556077	0.514832	0.46271	0.209263	0.443858	0.465535	0.489535	0.530203	0.443563	0.402758	0.343259	0.427125	0.487351	0.384282	0.459774	0.552049	0.496253	0.490782	0.589799	0.411236	0.412215	0.370038	0.19072	0.40745	0.393575	0.284663	0.476474	0.405644	0.404923	0.21625	0.430072
cg14102437	0.441077	0.411289	0.300897	0.459019	0.519035	0.539892	0.155054	0.354804	0.541005	0.486534	0.441825	0.540224	0.509297	0.415098	0.577497	0.742771	0.543426	0.583329	0.286322	0.337318	0.367668	0.726772	0.405456	0.475209	0.410447	0.4514	0.491488	0.394616	0.569222	0.466568	0.409521	0.590475	0.41684	0.282425	0.39685	0.443234	0.301502	0.455315	0.487909	0.499225	0.763265	0.427164	0.393496	0.638052	0.385879	0.497102	0.425635	0.708318	0.402689
cg26350671	0.385688	0.320959	0.265616	0.412298	0.401922	0.442441	0.166159	0.354776	0.462004	0.414088	0.340157	0.376792	0.347282	0.346487	0.384992	0.584441	0.338263	0.450888	0.222815	0.294824	0.374169	0.483807	0.311063	0.415913	0.398773	0.374504	0.34747	0.51524	0.470965	0.412192	0.383543	0.581646	0.403268	0.305862	0.362983	0.373747	0.301769	0.411333	0.376682	0.387118	0.633312	0.393654	0.354981	0.494537	0.33321	0.425056	0.339811	0.605918	0.357851
cg07850210	0.532113	0.575304	0.516855	0.653664	0.622097	0.60514	0.364134	0.546162	0.627123	0.634202	0.511556	0.584467	0.637478	0.446546	0.653152	0.870242	0.618476	0.574814	0.322825	0.449169	0.527117	0.697666	0.496165	0.582386	0.541459	0.635031	0.483869	0.833233	0.704984	0.582734	0.523677	0.877083	0.576837	0.483928	0.439404	0.487325	0.397734	0.599027	0.623904	0.586035	0.8815	0.559598	0.563842	0.747119	0.554658	0.560142	0.547735	0.90639	0.517525
cg20981515	0.412956	0.300883	0.240896	0.4095	0.444699	0.481792	0.108464	0.238173	0.529873	0.4206	0.340149	0.452555	0.490271	0.346088	0.526133	0.518045	0.420453	0.567994	0.299143	0.326333	0.338701	0.660258	0.359029	0.453194	0.335528	0.365317	0.408113	0.412202	0.673624	0.468343	0.267878	0.520536	0.272085	0.221064	0.362837	0.324067	0.138576	0.384485	0.439959	0.506913	0.745786	0.324311	0.413435	0.627185	0.351676	0.342016	0.429135	0.729166	0.429886
cg02054108	0.658953	0.63817	0.560566	0.652254	0.702779	0.693232	0.384203	0.632482	0.762686	0.719258	0.655674	0.692877	0.663067	0.651842	0.697362	0.889913	0.716561	0.746667	0.51629	0.615992	0.596907	0.865257	0.664892	0.707588	0.683777	0.631873	0.719866	0.577562	0.754168	0.687422	0.588393	0.714353	0.719792	0.557927	0.646198	0.695249	0.538432	0.678925	0.731315	0.652496	0.872013	0.689052	0.691359	0.788342	0.563205	0.712649	0.716821	0.836772	0.736649
cg13128440	0.565683	0.61489	0.460342	0.628662	0.660924	0.641497	0.303142	0.549335	0.68107	0.680704	0.592249	0.637023	0.650509	0.578056	0.646084	0.867729	0.640266	0.750607	0.453455	0.523303	0.589277	0.80696	0.587839	0.659177	0.598772	0.52687	0.594672	0.54747	0.681442	0.615046	0.558679	0.666476	0.654742	0.515407	0.548148	0.580929	0.490067	0.587084	0.658381	0.596427	0.844256	0.654116	0.604667	0.75642	0.547312	0.697569	0.620309	0.782415	0.573619
cg12067421	0.706215	0.802853	0.785881	0.71609	0.751881	0.700157	0.841627	0.788294	0.713489	0.734731	0.783053	0.684287	0.70617	0.757943	0.706702	0.739958	0.68558	0.650509	0.757376	0.789879	0.757441	0.620979	0.752859	0.740388	0.773315	0.751506	0.731021	0.740933	0.746075	0.705199	0.775741	0.655897	0.793636	0.802097	0.759263	0.779127	0.811792	0.758292	0.707409	0.683727	0.524108	0.749007	0.694963	0.594075	0.740235	0.716084	0.711605	0.59925	0.727115
cg25135018	0.187074	0.172981	0.189841	0.223037	0.289859	0.231417	0.0563829	0.108715	0.307386	0.22685	0.13067	0.224948	0.369211	0.0790345	0.298352	0.353011	0.235615	0.170764	0.0824979	0.100803	0.0632174	0.313951	0.114721	0.174996	0.104244	0.344875	0.085734	0.690169	0.367536	0.205013	0.166599	0.708459	0.0790221	0.095437	0.0906687	0.122798	0.0461826	0.228768	0.244425	0.241843	0.811748	0.0614574	0.0858536	0.449939	0.126068	0.140043	0.129251	0.805581	0.202149
cg07737558	0.625527	0.778223	0.757834	0.731195	0.642197	0.627163	0.867245	0.729358	0.597188	0.674017	0.759043	0.643487	0.727945	0.707211	0.673588	0.567058	0.6445	0.6665	0.801588	0.749275	0.774302	0.465001	0.642426	0.722678	0.778951	0.634286	0.675904	0.605673	0.564125	0.643024	0.739753	0.463354	0.743541	0.773977	0.712939	0.708728	0.807416	0.670104	0.712678	0.645916	0.427667	0.684664	0.704327	0.527052	0.725415	0.654462	0.696247	0.44879	0.654724
cg17101560	0.345765	0.226414	0.234469	0.32038	0.320541	0.378284	0.111489	0.2589	0.296701	0.316458	0.283929	0.373159	0.313363	0.297034	0.438535	0.335847	0.410421	0.45631	0.25608	0.221328	0.27653	0.395742	0.251518	0.349069	0.34319	0.20452	0.370148	0.253135	0.298575	0.388903	0.257929	0.385147	0.368132	0.25094	0.305244	0.287542	0.223994	0.301949	0.307551	0.328981	0.527483	0.344765	0.316417	0.450465	0.315117	0.343344	0.319638	0.499118	0.309874
cg22640868	0.258298	0.1587	0.148347	0.235977	0.245496	0.295449	0.0633051	0.174858	0.263916	0.237652	0.209426	0.277574	0.259136	0.204699	0.28855	0.349348	0.271103	0.358788	0.153201	0.158535	0.153273	0.355504	0.197316	0.310862	0.23458	0.154021	0.247493	0.211388	0.289353	0.25428	0.189251	0.262616	0.205795	0.13794	0.203632	0.207242	0.153759	0.20234	0.243898	0.273479	0.408288	0.234367	0.216235	0.354929	0.218663	0.192354	0.232396	0.371287	0.271801
cg24871922	0.497684	0.485911	0.372569	0.477813	0.575927	0.546853	0.235305	0.454807	0.609941	0.565742	0.532687	0.565333	0.558218	0.476198	0.56614	0.740285	0.554244	0.635209	0.35403	0.486497	0.468304	0.703025	0.546158	0.498636	0.482064	0.502551	0.570412	0.409695	0.568206	0.512067	0.46887	0.485037	0.547278	0.461531	0.477593	0.557624	0.392301	0.533383	0.566282	0.510335	0.702335	0.539465	0.516939	0.669205	0.452805	0.585954	0.551053	0.667609	0.539607
cg01150799	0.406687	0.453098	0.429281	0.434181	0.424957	0.380068	0.599052	0.515525	0.32344	0.336755	0.430273	0.255035	0.247786	0.524825	0.291518	0.252983	0.457402	0.400265	0.458402	0.486093	0.489709	0.257996	0.40951	0.464298	0.533463	0.267505	0.490171	0.175622	0.220045	0.320373	0.421766	0.173611	0.558321	0.573994	0.51357	0.536977	0.654393	0.318084	0.337591	0.241925	0.103428	0.46167	0.345969	0.195823	0.434253	0.391062	0.38132	0.102585	0.348667
cg14782256	0.426265	0.283202	0.311293	0.364117	0.421476	0.365165	0.175079	0.373319	0.60151	0.417106	0.422679	0.389572	0.323723	0.35945	0.451734	0.506068	0.415825	0.466888	0.292311	0.358668	0.318772	0.477953	0.358312	0.53316	0.364605	0.333872	0.463197	0.413856	0.458398	0.405297	0.342808	0.529515	0.328141	0.361873	0.329899	0.296271	0.258385	0.36274	0.522164	0.399945	0.593143	0.363518	0.41696	0.507156	0.357477	0.35231	0.395711	0.540833	0.45713
cg16509045	0.490073	0.444087	0.344656	0.475249	0.588364	0.507647	0.183	0.416872	0.596165	0.536406	0.468708	0.493311	0.566519	0.447569	0.513396	0.646534	0.602051	0.597302	0.28404	0.485719	0.432826	0.712071	0.552978	0.504949	0.49724	0.409545	0.501663	0.389569	0.574965	0.472801	0.401021	0.516703	0.50667	0.406419	0.483049	0.452978	0.351453	0.494245	0.546144	0.512077	0.682276	0.512609	0.478991	0.671886	0.411612	0.499943	0.488986	0.693346	0.563426
cg13932501	0.599377	0.492322	0.40084	0.52167	0.677952	0.597389	0.337942	0.531207	0.637195	0.648686	0.552044	0.54616	0.585972	0.537772	0.591694	0.732704	0.561806	0.70459	0.427483	0.56157	0.531283	0.79577	0.479657	0.61712	0.573403	0.509769	0.610514	0.605375	0.634888	0.615823	0.506172	0.658009	0.636492	0.450252	0.550027	0.622655	0.440985	0.604016	0.693792	0.633867	0.851761	0.590008	0.595292	0.726957	0.520083	0.612389	0.589406	0.721652	0.636024
cg03359463	0.337938	0.240347	0.223351	0.345896	0.327945	0.371871	0.124173	0.297549	0.337393	0.301511	0.283738	0.363954	0.402704	0.295537	0.379404	0.426345	0.3623	0.456283	0.215059	0.216957	0.29728	0.397159	0.278808	0.404125	0.313168	0.153085	0.367375	0.251667	0.338364	0.286885	0.295264	0.402946	0.353002	0.205722	0.299017	0.28166	0.217794	0.254106	0.272199	0.354384	0.502842	0.393279	0.283062	0.43825	0.215431	0.312497	0.390584	0.45466	0.345406
cg23007665	0.474855	0.579402	0.574079	0.553791	0.437298	0.507204	0.723304	0.504299	0.451991	0.441281	0.54368	0.44373	0.455314	0.587604	0.568539	0.162307	0.48222	0.352404	0.667475	0.630825	0.608117	0.202201	0.54252	0.483801	0.544942	0.637622	0.495659	0.420105	0.376979	0.495761	0.478792	0.313362	0.51612	0.631047	0.568924	0.544638	0.66384	0.445669	0.358185	0.334174	0.174351	0.449687	0.422515	0.234934	0.55145	0.448197	0.469309	0.290081	0.441129
cg14515199	0.340538	0.226003	0.254727	0.310679	0.290686	0.371554	0.135161	0.289646	0.302307	0.288371	0.262685	0.344306	0.298868	0.317306	0.340848	0.487104	0.344415	0.37443	0.235039	0.221135	0.303699	0.407713	0.387772	0.368454	0.340013	0.215076	0.354447	0.331004	0.338892	0.348437	0.310547	0.421776	0.315429	0.289639	0.297979	0.314144	0.248059	0.234541	0.335991	0.31439	0.548144	0.345252	0.31405	0.427498	0.253427	0.331173	0.341887	0.47955	0.300082
cg17995626	0.195514	0.11415	0.11855	0.173615	0.181108	0.243189	0.0464773	0.115738	0.131177	0.191597	0.19332	0.187908	0.177414	0.156553	0.243744	0.220839	0.213522	0.295358	0.0807945	0.135164	0.170547	0.192403	0.164798	0.161169	0.144335	0.14898	0.191176	0.128666	0.241678	0.244249	0.118536	0.217304	0.150049	0.0778795	0.130807	0.17231	0.0602584	0.158308	0.20839	0.271305	0.346839	0.184144	0.183141	0.268178	0.128053	0.186915	0.240782	0.274045	0.201619
cg15285436	0.500796	0.474489	0.362846	0.565877	0.576856	0.555166	0.164458	0.468886	0.605227	0.580677	0.485427	0.524213	0.526833	0.445918	0.527455	0.770807	0.511912	0.717034	0.319809	0.434376	0.46752	0.72959	0.440073	0.562235	0.502318	0.362821	0.557479	0.424899	0.599226	0.545767	0.414069	0.545931	0.582327	0.367671	0.448733	0.509599	0.359263	0.485002	0.487257	0.547734	0.812528	0.511096	0.459222	0.651432	0.412483	0.566487	0.481417	0.66484	0.579556
cg05434837	0.432097	0.456311	0.31997	0.472726	0.514955	0.549785	0.136757	0.473215	0.554521	0.515486	0.462837	0.478767	0.46552	0.42492	0.497706	0.706166	0.528124	0.636413	0.262239	0.312563	0.447334	0.692867	0.534387	0.571776	0.495142	0.185007	0.525957	0.392206	0.48259	0.508985	0.41984	0.50405	0.500229	0.341449	0.462989	0.435171	0.314497	0.448769	0.456043	0.519345	0.720881	0.506946	0.436712	0.64166	0.356296	0.448479	0.464251	0.663755	0.50314
cg25554496	0.680094	0.783711	0.786148	0.693726	0.727886	0.644872	0.874658	0.710027	0.685947	0.712234	0.72291	0.676234	0.772138	0.73717	0.727672	0.452522	0.70618	0.578699	0.834723	0.798917	0.716208	0.493714	0.755129	0.702736	0.741643	0.863894	0.621862	0.770235	0.667222	0.671586	0.754933	0.737019	0.720263	0.798535	0.771834	0.721231	0.811918	0.770296	0.700688	0.639455	0.559176	0.697504	0.662934	0.604142	0.763189	0.692083	0.717857	0.613329	0.751828
cg17875595	0.395318	0.259513	0.273785	0.338833	0.351506	0.453747	0.149001	0.287889	0.382429	0.311748	0.312258	0.415053	0.34626	0.345704	0.424793	0.412927	0.372321	0.491259	0.298664	0.373509	0.187013	0.406306	0.411638	0.341482	0.404156	0.255025	0.409904	0.332731	0.392685	0.336065	0.380658	0.515448	0.283692	0.291518	0.295661	0.309872	0.2019	0.312029	0.353035	0.397423	0.61927	0.316513	0.313253	0.520718	0.289993	0.366861	0.345925	0.550844	0.452972
cg07989508	0.471354	0.431768	0.407375	0.480606	0.457278	0.532632	0.315963	0.399604	0.577117	0.495095	0.425184	0.436726	0.506056	0.393594	0.571378	0.428133	0.479921	0.578935	0.417209	0.418461	0.384573	0.55158	0.362315	0.43566	0.399779	0.399699	0.450999	0.464181	0.556814	0.463448	0.508636	0.523371	0.373795	0.386531	0.346902	0.45576	0.344363	0.43193	0.44757	0.449161	0.65975	0.435198	0.461348	0.580625	0.4333	0.440461	0.509254	0.652492	0.554006
cg16998502	0.553731	0.611494	0.687343	0.569166	0.536432	0.464908	0.676691	0.597768	0.495494	0.491236	0.570908	0.53389	0.514921	0.608134	0.530911	0.261248	0.562605	0.548433	0.731144	0.656531	0.617022	0.247489	0.546695	0.553894	0.600427	0.527437	0.602269	0.391968	0.439484	0.537498	0.513374	0.290344	0.595686	0.663776	0.585944	0.57098	0.757432	0.47887	0.536955	0.463319	0.221891	0.537336	0.475398	0.271113	0.606489	0.592437	0.551922	0.25671	0.55507
cg04353103	0.371004	0.275848	0.29972	0.368784	0.360835	0.371333	0.110286	0.249823	0.3998	0.322488	0.321482	0.362513	0.370841	0.300748	0.428163	0.418873	0.285104	0.515046	0.200698	0.260922	0.328328	0.420703	0.323428	0.35031	0.327507	0.238595	0.335155	0.213133	0.405346	0.369517	0.212265	0.473823	0.309863	0.24621	0.331649	0.277282	0.184777	0.249976	0.36758	0.324928	0.59884	0.354452	0.358583	0.457692	0.189566	0.35994	0.329583	0.490947	0.334231
cg23103826	0.516181	0.457244	0.421664	0.522403	0.517267	0.557562	0.29785	0.47856	0.531166	0.537534	0.501834	0.573075	0.562169	0.486598	0.520202	0.681751	0.593495	0.60336	0.369229	0.412828	0.43645	0.682774	0.473763	0.535154	0.480203	0.565204	0.508642	0.494206	0.606062	0.536629	0.533459	0.538641	0.5467	0.455476	0.472349	0.49073	0.394733	0.506436	0.470056	0.491226	0.719831	0.545064	0.463551	0.655213	0.456753	0.537044	0.515621	0.625447	0.49408
cg10136671	0.571779	0.525091	0.472929	0.617854	0.61081	0.588448	0.325776	0.518362	0.598067	0.635255	0.569364	0.616606	0.616397	0.511222	0.632052	0.749239	0.584492	0.621233	0.563674	0.496259	0.605062	0.718145	0.528469	0.615868	0.493762	0.55981	0.503845	0.567687	0.669316	0.602946	0.540853	0.679398	0.519436	0.500085	0.561106	0.545616	0.507738	0.557988	0.54164	0.640408	0.744348	0.625222	0.535204	0.702381	0.499806	0.617124	0.563741	0.743851	0.595652
cg02111865	0.520106	0.478039	0.409505	0.512089	0.569372	0.566123	0.155363	0.456726	0.643425	0.549778	0.481695	0.550034	0.564471	0.485935	0.527506	0.842399	0.591561	0.659704	0.338357	0.395946	0.375529	0.80646	0.414111	0.610025	0.4606	0.459606	0.522719	0.411496	0.644366	0.528132	0.466201	0.586603	0.471425	0.364568	0.444504	0.465727	0.361064	0.48726	0.533719	0.526635	0.828762	0.508464	0.461711	0.69471	0.383244	0.59133	0.539399	0.692745	0.56674
cg26806588	0.571664	0.536328	0.558817	0.55044	0.597951	0.621463	0.459139	0.489796	0.600684	0.564224	0.559086	0.605264	0.59807	0.53104	0.645354	0.656118	0.575018	0.624922	0.555968	0.577616	0.492482	0.597982	0.562592	0.561981	0.51288	0.659439	0.548749	0.825801	0.625901	0.588064	0.59726	0.823954	0.507892	0.539128	0.523038	0.507456	0.450327	0.596963	0.615055	0.620322	0.833005	0.538943	0.587365	0.728937	0.523304	0.548347	0.606031	0.866324	0.62279
cg14918548	0.457478	0.331873	0.313233	0.439099	0.453115	0.505089	0.13125	0.36632	0.555657	0.528158	0.413049	0.455878	0.439655	0.397826	0.423807	0.693315	0.482536	0.580494	0.273904	0.384447	0.349951	0.641476	0.444162	0.467692	0.409495	0.414901	0.458135	0.340167	0.564004	0.471744	0.346302	0.485309	0.411432	0.33676	0.422605	0.427183	0.286998	0.454123	0.451778	0.478106	0.702065	0.416006	0.40443	0.60169	0.405728	0.504093	0.419365	0.678623	0.466837
cg26995224	0.490017	0.600796	0.435376	0.559509	0.619591	0.64649	0.42232	0.620506	0.557833	0.565631	0.592902	0.530998	0.491684	0.571372	0.550235	0.615452	0.581574	0.633265	0.557965	0.633556	0.447698	0.558275	0.536512	0.641373	0.659761	0.395503	0.570399	0.404424	0.548899	0.573157	0.591782	0.373541	0.519091	0.548686	0.588389	0.617904	0.64026	0.541958	0.509508	0.671923	0.345335	0.587869	0.494385	0.438709	0.452665	0.535597	0.546309	0.259575	0.628432
cg27119660	0.168869	0.172181	0.180438	0.192047	0.231811	0.267045	0.0443606	0.0965865	0.239398	0.266175	0.138027	0.253359	0.163521	0.0879765	0.147798	0.457427	0.128752	0.28013	0.0759559	0.124341	0.122416	0.359625	0.0964551	0.209816	0.164958	0.0875665	0.101056	0.596075	0.269788	0.205957	0.157877	0.677604	0.194773	0.0985764	0.12523	0.119533	0.0858348	0.161752	0.165701	0.140284	0.573138	0.175897	0.116083	0.350242	0.11579	0.155806	0.157908	0.574123	0.141968
cg11247817	0.407707	0.335221	0.317605	0.322786	0.470473	0.408649	0.147854	0.334486	0.401313	0.464845	0.371573	0.44748	0.457146	0.332717	0.456909	0.586397	0.276794	0.584003	0.25852	0.402681	0.343519	0.575699	0.214121	0.451183	0.300503	0.338809	0.446029	0.341768	0.471108	0.336797	0.299992	0.517751	0.373439	0.291454	0.412137	0.343208	0.161505	0.420436	0.439676	0.387725	0.745412	0.336139	0.306191	0.562074	0.385237	0.370675	0.404088	0.647286	0.450285
cg10990616	0.468875	0.574245	0.474427	0.495875	0.500365	0.513747	0.599331	0.535818	0.497412	0.366831	0.516816	0.467885	0.49047	0.594112	0.426719	0.37839	0.580355	0.569879	0.554883	0.582806	0.598667	0.391567	0.479543	0.574016	0.526678	0.389426	0.601632	0.268675	0.375899	0.506585	0.44149	0.305536	0.600689	0.58428	0.562976	0.627863	0.559728	0.465565	0.485253	0.431809	0.222521	0.606885	0.473946	0.341614	0.525167	0.545147	0.533858	0.224163	0.566571
cg17852032	0.385817	0.360423	0.315807	0.421628	0.486548	0.474897	0.145057	0.273662	0.470567	0.518329	0.434865	0.438966	0.506052	0.315388	0.405852	0.685462	0.402562	0.451531	0.234977	0.353683	0.292808	0.559514	0.312556	0.435909	0.397069	0.425303	0.347714	0.540812	0.554603	0.44903	0.434992	0.661553	0.395049	0.269439	0.345465	0.341946	0.274351	0.374228	0.396693	0.404773	0.717248	0.378808	0.348702	0.612454	0.288838	0.365613	0.386052	0.69677	0.42112
cg03640732	0.514697	0.530537	0.421797	0.550793	0.613433	0.578274	0.273123	0.450546	0.636252	0.66562	0.548879	0.616293	0.564265	0.518229	0.57984	0.70451	0.567683	0.642112	0.47019	0.498973	0.514472	0.730083	0.505531	0.564949	0.509581	0.56922	0.563128	0.554895	0.671074	0.563652	0.566595	0.660915	0.581099	0.419848	0.467919	0.521254	0.391348	0.534916	0.661949	0.582624	0.793136	0.571937	0.502282	0.704023	0.449697	0.555994	0.536234	0.745354	0.573668
cg02423856	0.323811	0.30915	0.347251	0.270785	0.35017	0.34472	0.132702	0.270995	0.341706	0.304469	0.313612	0.395007	0.321018	0.275619	0.409795	0.394051	0.23882	0.440819	0.341936	0.306855	0.185559	0.40235	0.299193	0.335049	0.358439	0.318631	0.396718	0.274954	0.375569	0.35754	0.400345	0.346096	0.169641	0.211885	0.233648	0.184583	0.235324	0.353085	0.431289	0.422215	0.614563	0.195869	0.172406	0.492853	0.315885	0.330249	0.341387	0.540292	0.320181
cg03336205	0.36068	0.324808	0.245066	0.403968	0.395284	0.446915	0.10569	0.351889	0.410478	0.398033	0.337831	0.354683	0.386344	0.337525	0.387636	0.643742	0.365818	0.492916	0.186153	0.287405	0.357716	0.565546	0.378835	0.497072	0.396184	0.119513	0.383636	0.361272	0.416857	0.415269	0.318593	0.518712	0.439215	0.284417	0.336173	0.381052	0.260683	0.322684	0.350122	0.383994	0.647806	0.421918	0.352348	0.504319	0.279514	0.389491	0.372577	0.540914	0.388182
cg00978006	0.39154	0.33987	0.283754	0.402839	0.433681	0.401711	0.143376	0.397875	0.45253	0.434039	0.383246	0.385146	0.399503	0.398624	0.409266	0.647995	0.3817	0.490568	0.285602	0.321077	0.360061	0.527753	0.430155	0.469954	0.428558	0.22935	0.43732	0.351831	0.468368	0.411237	0.330883	0.502247	0.45874	0.321431	0.375213	0.422117	0.296895	0.348504	0.401481	0.415628	0.615866	0.420007	0.367542	0.53257	0.273955	0.439603	0.400594	0.553897	0.425561
cg15967278	0.116076	0.11705	0.154347	0.134005	0.146948	0.144442	0.047586	0.0712855	0.101662	0.152126	0.0901804	0.119602	0.151963	0.0926319	0.0717933	0.290119	0.0734003	0.106953	0.0595507	0.0945718	0.0864588	0.216292	0.058287	0.131159	0.121032	0.093598	0.0556635	0.42184	0.149922	0.117992	0.0846669	0.67767	0.121934	0.126509	0.103835	0.0820297	0.063532	0.13795	0.12145	0.116865	0.51555	0.0968859	0.0726094	0.215462	0.080338	0.0929804	0.0669532	0.504429	0.0998325
cg13451886	0.603277	0.737807	0.758979	0.614819	0.618604	0.59565	0.840894	0.63715	0.681233	0.692613	0.695717	0.613219	0.6416	0.69644	0.616458	0.539512	0.659274	0.562068	0.735598	0.707045	0.667304	0.54114	0.620627	0.608085	0.69222	0.77442	0.617405	0.659445	0.630015	0.613365	0.71507	0.567036	0.642248	0.704795	0.645278	0.692321	0.73947	0.723665	0.645606	0.545654	0.441493	0.627066	0.601377	0.504167	0.680726	0.623942	0.620184	0.530168	0.61621
cg04784315	0.507825	0.4743	0.41553	0.539418	0.505457	0.558647	0.254627	0.477757	0.60749	0.557777	0.487017	0.563136	0.548318	0.499083	0.511011	0.782	0.546562	0.626796	0.369874	0.380795	0.423887	0.770351	0.453664	0.570236	0.486336	0.40501	0.55119	0.493745	0.569567	0.532002	0.432375	0.629072	0.531709	0.41212	0.480559	0.493283	0.399806	0.49464	0.519292	0.520714	0.764222	0.522323	0.485799	0.660599	0.38898	0.583082	0.535585	0.698289	0.511747
cg07267547	0.294536	0.15122	0.158125	0.26558	0.252917	0.310081	0.0624928	0.202678	0.255366	0.256025	0.204177	0.28491	0.253917	0.239992	0.289021	0.372731	0.258427	0.332825	0.150267	0.204628	0.22566	0.339007	0.241474	0.273876	0.267969	0.205743	0.298874	0.253307	0.306468	0.318776	0.209347	0.326144	0.247039	0.19866	0.245344	0.208888	0.160383	0.187543	0.248838	0.288047	0.444506	0.251093	0.220529	0.345997	0.171418	0.250927	0.2412	0.372585	0.250962
cg03008244	0.420808	0.334197	0.316296	0.398179	0.383646	0.45387	0.189732	0.328296	0.469725	0.423595	0.409592	0.45119	0.455642	0.397417	0.429072	0.483516	0.400122	0.457772	0.297594	0.357225	0.353846	0.494895	0.391244	0.45135	0.415472	0.335136	0.463939	0.415344	0.459476	0.435702	0.408931	0.47019	0.391707	0.362961	0.375858	0.408118	0.308087	0.398494	0.447037	0.42839	0.563789	0.410907	0.396005	0.497782	0.373848	0.394751	0.395489	0.539733	0.445374
cg24060744	0.470289	0.332565	0.293456	0.363033	0.539501	0.503951	0.145424	0.308104	0.545717	0.444538	0.418916	0.481433	0.501653	0.395257	0.500623	0.539193	0.494551	0.560147	0.299683	0.380611	0.263994	0.580425	0.455978	0.47017	0.461258	0.384888	0.509379	0.407871	0.602262	0.438126	0.3971	0.575426	0.372824	0.289624	0.404545	0.390835	0.279219	0.454462	0.58298	0.49413	0.745944	0.408261	0.484515	0.635523	0.378687	0.467945	0.450504	0.638998	0.549467
cg24365525	0.723587	0.676353	0.636203	0.683277	0.762307	0.723323	0.581827	0.676134	0.764777	0.728751	0.704247	0.729034	0.729705	0.704708	0.727507	0.724537	0.818541	0.815686	0.70751	0.686004	0.589272	0.758945	0.74567	0.713919	0.721311	0.671961	0.744801	0.724088	0.768921	0.741258	0.71584	0.827089	0.68851	0.610045	0.686759	0.614775	0.640935	0.721221	0.806697	0.715369	0.886173	0.691794	0.689913	0.827224	0.744807	0.699957	0.750398	0.867814	0.705684
cg06381319	0.604337	0.735469	0.76185	0.57757	0.608279	0.590007	0.896392	0.669762	0.563244	0.623002	0.698925	0.552696	0.61171	0.674848	0.610512	0.415085	0.651768	0.532486	0.762517	0.716026	0.769135	0.306271	0.652354	0.681549	0.711925	0.690978	0.595593	0.592299	0.490165	0.593708	0.703428	0.539478	0.635757	0.7422	0.716224	0.707058	0.794654	0.633789	0.63199	0.465911	0.266976	0.623594	0.567355	0.364023	0.656264	0.545816	0.652778	0.354155	0.576612
cg10317164	0.437435	0.314328	0.283854	0.379362	0.428695	0.493885	0.149526	0.308527	0.49047	0.459758	0.382892	0.468952	0.483502	0.37346	0.443875	0.497113	0.486443	0.532955	0.281324	0.340121	0.334171	0.587426	0.402778	0.43733	0.412662	0.416872	0.457575	0.353177	0.490496	0.42448	0.367891	0.472437	0.387312	0.303506	0.35235	0.389865	0.288913	0.416707	0.474966	0.476199	0.663402	0.382487	0.375183	0.600235	0.366656	0.387172	0.41496	0.609021	0.436253
cg06780628	0.419106	0.353563	0.278931	0.401043	0.448414	0.447695	0.186891	0.381969	0.480268	0.437839	0.406876	0.425056	0.454813	0.39872	0.424905	0.554484	0.477486	0.459119	0.315259	0.342436	0.353825	0.558489	0.378274	0.49344	0.42644	0.273388	0.471863	0.40959	0.493172	0.466502	0.379163	0.43175	0.430228	0.336394	0.387784	0.406429	0.311965	0.415146	0.479869	0.455824	0.620804	0.411143	0.377246	0.555487	0.363355	0.405325	0.426602	0.557423	0.421707
cg11124069	0.307268	0.287182	0.284806	0.307754	0.384037	0.312795	0.157815	0.286286	0.310217	0.376701	0.269359	0.326144	0.427125	0.294584	0.399437	0.650547	0.377261	0.395356	0.135931	0.236052	0.310003	0.382826	0.2673	0.29097	0.329302	0.241411	0.312613	0.31618	0.402739	0.303884	0.296761	0.418145	0.30116	0.250898	0.243339	0.269747	0.2475	0.269689	0.324257	0.376881	0.508932	0.317546	0.280515	0.451336	0.253152	0.30848	0.330644	0.489898	0.360074
cg14861383	0.584826	0.574646	0.494908	0.572277	0.673183	0.653063	0.324173	0.594258	0.671167	0.662652	0.540236	0.648778	0.613646	0.562049	0.637636	0.819209	0.597287	0.715032	0.397476	0.516493	0.529843	0.816106	0.582343	0.634565	0.578171	0.640926	0.621669	0.580187	0.698977	0.586669	0.549523	0.704392	0.607652	0.479897	0.572689	0.59857	0.471668	0.575252	0.59558	0.606517	0.824479	0.61955	0.583154	0.769683	0.511387	0.64693	0.634474	0.841644	0.607643
cg06476926	0.765148	0.785104	0.77594	0.751651	0.761211	0.731505	0.822987	0.777941	0.759245	0.730528	0.789794	0.688545	0.747779	0.773542	0.804035	0.532357	0.763297	0.76643	0.822962	0.838976	0.883144	0.555387	0.801042	0.693105	0.810815	0.834268	0.792272	0.76691	0.6597	0.748195	0.665338	0.664242	0.91362	0.75943	0.835818	0.791114	0.859369	0.814586	0.779527	0.729196	0.519609	0.791336	0.718827	0.623813	0.732052	0.76091	0.705665	0.608866	0.725398
cg16961420	0.288204	0.198894	0.241104	0.263206	0.297938	0.280261	0.168596	0.165303	0.277769	0.283563	0.244851	0.269468	0.297186	0.223941	0.314559	0.33081	0.237022	0.357087	0.215274	0.230924	0.17878	0.361724	0.199506	0.254761	0.28439	0.189733	0.265753	0.37353	0.329336	0.18194	0.26571	0.412831	0.173784	0.200153	0.204204	0.240936	0.175687	0.219788	0.280162	0.28186	0.56953	0.156801	0.162539	0.39279	0.219606	0.194712	0.244673	0.541763	0.281881
cg05903736	0.299276	0.191867	0.163993	0.232798	0.296658	0.308663	0.101539	0.233696	0.329393	0.301431	0.268931	0.321943	0.371485	0.24437	0.308013	0.285253	0.297315	0.339245	0.273814	0.278199	0.145566	0.365207	0.29455	0.340446	0.251691	0.362031	0.323482	0.341363	0.365229	0.296666	0.323176	0.408433	0.171838	0.196364	0.261942	0.239077	0.184202	0.333257	0.363844	0.36499	0.497548	0.244849	0.236556	0.402247	0.301491	0.267517	0.296276	0.465142	0.317116
cg05121110	0.641227	0.745865	0.748509	0.644139	0.642729	0.636742	0.898955	0.692022	0.616878	0.65727	0.715209	0.603164	0.630333	0.721336	0.655216	0.366703	0.701215	0.578787	0.848733	0.743432	0.729751	0.371334	0.687295	0.632521	0.717642	0.817854	0.638478	0.696688	0.589436	0.623267	0.747272	0.592184	0.668994	0.78051	0.709837	0.702657	0.803802	0.680876	0.692965	0.578975	0.321528	0.601454	0.627932	0.448398	0.728082	0.617139	0.678597	0.46928	0.65224
cg09624918	0.409542	0.309607	0.271349	0.361691	0.389261	0.427801	0.130414	0.415663	0.476294	0.363305	0.353838	0.418311	0.439226	0.349994	0.525007	0.593652	0.398439	0.579845	0.285598	0.327237	0.267732	0.457034	0.325208	0.454139	0.34741	0.19199	0.476181	0.361362	0.402139	0.37508	0.323143	0.458123	0.393814	0.337223	0.359561	0.358246	0.227776	0.382337	0.475078	0.4397	0.635729	0.360496	0.365365	0.536629	0.329071	0.394625	0.397353	0.554636	0.373705
cg26624100	0.429555	0.361818	0.330532	0.426469	0.454373	0.516803	0.0574324	0.351677	0.521062	0.50295	0.44294	0.390731	0.343255	0.335768	0.510279	0.424913	0.533482	0.657448	0.236462	0.324484	0.30127	0.607592	0.463917	0.49307	0.417718	0.30937	0.60239	0.359209	0.508976	0.417214	0.345408	0.473	0.405369	0.305776	0.436289	0.356318	0.240899	0.414152	0.445094	0.480591	0.711881	0.369214	0.284483	0.581391	0.323989	0.320173	0.416218	0.670395	0.47583
cg17211147	0.331814	0.238213	0.197098	0.314419	0.327269	0.395296	0.0673229	0.246996	0.379011	0.339442	0.314565	0.342465	0.333938	0.286752	0.345111	0.415284	0.301366	0.428684	0.186669	0.222202	0.267286	0.466992	0.258826	0.361147	0.279118	0.330072	0.353323	0.316107	0.389233	0.352831	0.270487	0.500862	0.289005	0.250691	0.306062	0.315216	0.196992	0.294754	0.282126	0.363854	0.521484	0.343138	0.302748	0.433091	0.24388	0.310899	0.325527	0.493446	0.329351
cg08906056	0.750777	0.784839	0.8074	0.754924	0.719289	0.719363	0.813714	0.848785	0.753653	0.745407	0.737589	0.665982	0.715227	0.795033	0.800419	0.694606	0.664069	0.682725	0.807825	0.790905	0.810382	0.542707	0.714643	0.73808	0.803994	0.719069	0.664372	0.698701	0.71901	0.760774	0.80642	0.739287	0.836923	0.855767	0.810398	0.800178	0.859909	0.723574	0.727079	0.663555	0.460906	0.756181	0.755613	0.560184	0.732355	0.773275	0.722999	0.471605	0.676756
cg25578949	0.601109	0.701268	0.720763	0.593248	0.559406	0.599825	0.795567	0.710222	0.656244	0.632629	0.686495	0.615358	0.679891	0.64657	0.603323	0.396052	0.69155	0.546897	0.687991	0.70434	0.665552	0.462944	0.631837	0.61917	0.594306	0.778294	0.561823	0.581697	0.574834	0.595686	0.696344	0.532361	0.629209	0.691275	0.624507	0.61081	0.701527	0.655217	0.624457	0.556575	0.433119	0.641479	0.500678	0.511341	0.633107	0.578378	0.594283	0.433142	0.676283
cg05702597	0.276406	0.278548	0.362215	0.274875	0.270067	0.270187	0.405288	0.402938	0.182681	0.191414	0.369006	0.176546	0.128557	0.389695	0.166811	0.0567215	0.312567	0.226666	0.433457	0.35797	0.34858	0.0552443	0.296966	0.377175	0.370818	0.204344	0.351775	0.164642	0.11947	0.209027	0.258739	0.283643	0.383441	0.374629	0.466304	0.402521	0.491521	0.185053	0.195461	0.136966	0.0750773	0.27301	0.209697	0.0866931	0.193653	0.177261	0.30824	0.0857939	0.304743
cg19204283	0.505753	0.606309	0.568076	0.493682	0.516983	0.544524	0.699505	0.65539	0.514606	0.51941	0.556101	0.458512	0.462088	0.565743	0.511697	0.331994	0.532744	0.472239	0.740808	0.580718	0.632328	0.336016	0.490088	0.51274	0.626888	0.494093	0.494291	0.509249	0.462327	0.452347	0.579108	0.4751	0.600593	0.630358	0.539973	0.559085	0.650659	0.529572	0.53467	0.442319	0.241479	0.522234	0.402145	0.354647	0.555668	0.485751	0.568165	0.27788	0.478051
cg20705070	0.723391	0.829615	0.820349	0.778229	0.749028	0.663449	0.911309	0.825267	0.723183	0.753387	0.797218	0.69986	0.690254	0.786741	0.761637	0.621951	0.700819	0.727253	0.864954	0.849915	0.849293	0.636901	0.779411	0.77498	0.795187	0.787704	0.716071	0.698709	0.646683	0.725607	0.791125	0.633912	0.823407	0.843105	0.817508	0.765291	0.856002	0.734966	0.757303	0.682631	0.449964	0.744379	0.746592	0.556255	0.757829	0.711729	0.73874	0.544876	0.751205
cg07125403	0.49427	0.41775	0.341371	0.515236	0.532941	0.553196	0.152881	0.44519	0.576357	0.514142	0.477586	0.536839	0.546733	0.43496	0.524094	0.754155	0.525113	0.607235	0.333395	0.376709	0.432391	0.756356	0.520521	0.592881	0.498538	0.273126	0.540326	0.428951	0.600592	0.553633	0.416585	0.489375	0.534587	0.358024	0.453295	0.53619	0.338458	0.469651	0.497695	0.550833	0.743111	0.534945	0.442719	0.692378	0.395437	0.489888	0.47647	0.690889	0.530503
cg24371033	0.461849	0.38633	0.307	0.499816	0.486992	0.498397	0.194907	0.401561	0.461195	0.467588	0.441595	0.465628	0.492998	0.439367	0.43393	0.63055	0.481585	0.553523	0.307918	0.362093	0.372634	0.646443	0.460791	0.477062	0.451809	0.408428	0.498804	0.434043	0.546566	0.508641	0.395874	0.537818	0.419827	0.356127	0.395196	0.431523	0.328825	0.432146	0.441286	0.48556	0.701103	0.47128	0.393094	0.591016	0.396333	0.487945	0.411631	0.630837	0.445686
cg23923820	0.341065	0.387847	0.320158	0.362054	0.337286	0.326387	0.377825	0.439227	0.327444	0.362245	0.37703	0.319708	0.249934	0.438441	0.288514	0.143114	0.349208	0.440626	0.418504	0.385656	0.457033	0.224357	0.384122	0.400173	0.366443	0.372734	0.417433	0.0942216	0.199091	0.324137	0.277219	0.175979	0.432025	0.46957	0.39358	0.441336	0.448526	0.341758	0.310701	0.298691	0.0617726	0.459693	0.30742	0.208443	0.329046	0.350431	0.385502	0.129881	0.352971
cg23560026	0.411368	0.358198	0.248021	0.430471	0.451437	0.491963	0.117251	0.368226	0.500267	0.46321	0.414055	0.501094	0.455906	0.373799	0.482289	0.67512	0.514031	0.531598	0.233013	0.325046	0.372138	0.665514	0.379619	0.47396	0.398312	0.349484	0.448416	0.288532	0.503274	0.439529	0.357158	0.470458	0.448773	0.294963	0.350187	0.403274	0.27136	0.389389	0.432076	0.487088	0.687551	0.433423	0.359206	0.587743	0.318421	0.420018	0.422342	0.608151	0.456821
cg13866747	0.629891	0.694615	0.631728	0.657524	0.713028	0.67843	0.571427	0.60507	0.739541	0.700011	0.636878	0.770051	0.786698	0.629015	0.739231	0.724126	0.669234	0.606667	0.671934	0.691958	0.488982	0.76238	0.498372	0.647834	0.642422	0.679169	0.742303	0.809538	0.757098	0.645477	0.758063	0.883756	0.548808	0.558663	0.579791	0.637321	0.619411	0.724893	0.743806	0.664201	0.917559	0.585162	0.611439	0.774426	0.610651	0.69801	0.564144	0.832162	0.723908
cg04414297	0.140471	0.129079	0.149711	0.170154	0.149627	0.133363	0.0690837	0.12131	0.165935	0.161123	0.108843	0.130607	0.1595	0.110556	0.136084	0.328383	0.0948723	0.129233	0.104721	0.0991715	0.101181	0.234962	0.105122	0.133934	0.157047	0.11306	0.121824	0.265285	0.162046	0.140063	0.167053	0.477392	0.12969	0.134091	0.123682	0.158096	0.116308	0.147878	0.128139	0.101132	0.336589	0.129844	0.116857	0.201504	0.0901219	0.113465	0.11327	0.464292	0.122011
cg02572891	0.497153	0.410504	0.292446	0.485569	0.566761	0.49062	0.227309	0.311144	0.597216	0.595895	0.454917	0.55795	0.478797	0.429134	0.492221	0.600437	0.485652	0.566313	0.373862	0.386055	0.414193	0.606282	0.435509	0.468956	0.444448	0.544657	0.501052	0.511085	0.560477	0.519602	0.346197	0.582093	0.468951	0.346589	0.437482	0.444272	0.367494	0.47009	0.639662	0.517598	0.703952	0.497561	0.498132	0.615636	0.400455	0.48367	0.485962	0.707099	0.477273
cg22048292	0.407754	0.37559	0.315103	0.426102	0.46921	0.466315	0.118383	0.350394	0.519733	0.470949	0.389557	0.503992	0.481314	0.370664	0.535083	0.595004	0.434272	0.571681	0.201559	0.346271	0.411744	0.661576	0.326733	0.491919	0.390206	0.313401	0.462671	0.318555	0.511082	0.383347	0.370596	0.511024	0.407583	0.272103	0.413502	0.407188	0.234387	0.402587	0.462382	0.47856	0.794028	0.389234	0.386509	0.637511	0.391735	0.380274	0.467538	0.625018	0.458864
cg25014676	0.562565	0.498306	0.474055	0.556094	0.574672	0.588339	0.298034	0.325759	0.603767	0.640115	0.549894	0.585339	0.599256	0.574981	0.631987	0.623283	0.599412	0.720272	0.476015	0.517675	0.396156	0.698672	0.467215	0.529141	0.55962	0.48147	0.607851	0.649249	0.591061	0.568796	0.518151	0.652148	0.525501	0.401911	0.486998	0.510047	0.44492	0.53446	0.622501	0.505924	0.785435	0.507749	0.569337	0.671581	0.578321	0.532252	0.565005	0.636345	0.584406
cg05672540	0.424562	0.345041	0.286855	0.39187	0.437826	0.409716	0.244215	0.379412	0.460559	0.463152	0.420499	0.425108	0.462739	0.410426	0.465274	0.485859	0.443137	0.522051	0.349649	0.373984	0.362839	0.51055	0.415116	0.472682	0.428597	0.316147	0.4518	0.405977	0.491775	0.477095	0.415831	0.490472	0.434713	0.348608	0.385459	0.392995	0.336737	0.43954	0.519197	0.432387	0.609836	0.415648	0.401184	0.531372	0.365766	0.398025	0.450038	0.541289	0.48814
cg04072771	0.389947	0.23426	0.190503	0.318779	0.334584	0.415646	0.100358	0.257827	0.389927	0.337801	0.338038	0.378394	0.399338	0.302689	0.428819	0.40925	0.37236	0.457829	0.262492	0.257519	0.271484	0.502067	0.354698	0.406829	0.35443	0.21693	0.399274	0.304106	0.416106	0.367894	0.323843	0.43841	0.317226	0.273552	0.284725	0.348808	0.21047	0.374729	0.41847	0.389931	0.60906	0.3374	0.294833	0.517769	0.286209	0.358312	0.354026	0.564589	0.380067
cg23627448	0.692927	0.811924	0.782461	0.785985	0.684893	0.748329	0.83707	0.757282	0.64722	0.724621	0.773628	0.774252	0.823196	0.761357	0.68092	0.527428	0.764361	0.536177	0.875507	0.704972	0.79971	0.566892	0.705465	0.738751	0.755728	0.791087	0.753526	0.62962	0.726779	0.759091	0.783146	0.67585	0.707393	0.735057	0.772689	0.750091	0.845092	0.734429	0.553987	0.680021	0.559013	0.694762	0.65663	0.591278	0.74141	0.738904	0.53089	0.649719	0.681638
cg08257816	0.70984	0.784664	0.843058	0.756434	0.695814	0.710797	0.897451	0.711494	0.703225	0.719078	0.728715	0.721933	0.759981	0.740567	0.696964	0.681213	0.695472	0.674034	0.851327	0.755252	0.731569	0.529318	0.712953	0.738751	0.778588	0.622207	0.651308	0.74273	0.65169	0.705302	0.763626	0.624375	0.722184	0.789729	0.787221	0.789145	0.851484	0.712431	0.561487	0.681323	0.496207	0.714174	0.645246	0.565375	0.740771	0.716092	0.702776	0.582566	0.816705
cg16834726	0.46714	0.510085	0.378391	0.50029	0.55713	0.526431	0.31405	0.477313	0.576226	0.542173	0.473764	0.468692	0.435736	0.463093	0.46778	0.767195	0.44953	0.551571	0.375738	0.43439	0.467104	0.624203	0.510402	0.471547	0.518924	0.494868	0.440227	0.579441	0.531473	0.542288	0.404626	0.765766	0.549582	0.404026	0.442631	0.48856	0.400502	0.480884	0.565541	0.445069	0.741999	0.546749	0.486957	0.617173	0.399556	0.50943	0.459515	0.711422	0.502505
cg08675214	0.423079	0.36787	0.298943	0.437366	0.441767	0.500651	0.15231	0.369463	0.480677	0.476846	0.414577	0.459082	0.463845	0.383131	0.463134	0.616624	0.508033	0.542008	0.247817	0.332642	0.368125	0.656058	0.391469	0.470334	0.37768	0.498544	0.469431	0.339922	0.534947	0.434162	0.450494	0.479564	0.438091	0.344003	0.388808	0.412775	0.293783	0.391257	0.429457	0.463897	0.68869	0.437882	0.381292	0.571908	0.332858	0.463849	0.410692	0.601937	0.475257
cg21854896	0.487905	0.408709	0.323618	0.490845	0.531945	0.535922	0.13358	0.401906	0.61811	0.51675	0.469625	0.53375	0.565641	0.396616	0.524634	0.713033	0.570687	0.604859	0.33387	0.416584	0.315992	0.714428	0.479183	0.469073	0.512482	0.401035	0.535271	0.443319	0.622748	0.534502	0.358258	0.459093	0.428596	0.340634	0.41941	0.435172	0.361641	0.479321	0.516317	0.544157	0.799937	0.471982	0.425445	0.669174	0.397528	0.487334	0.441011	0.722148	0.54962
cg22984446	0.434126	0.362873	0.298383	0.475881	0.461686	0.491795	0.107361	0.382036	0.555256	0.499625	0.416904	0.525232	0.455875	0.384046	0.478024	0.699417	0.497361	0.626715	0.273746	0.34066	0.351879	0.733189	0.400547	0.474346	0.388443	0.395447	0.462039	0.329484	0.535886	0.500998	0.366174	0.494973	0.460093	0.353755	0.384783	0.417056	0.316739	0.424984	0.428946	0.480799	0.749293	0.498185	0.41836	0.617574	0.392403	0.4613	0.449058	0.653404	0.406558
cg11788604	0.598772	0.498181	0.383969	0.52448	0.653354	0.615087	0.237684	0.495759	0.659047	0.632748	0.54731	0.532555	0.608867	0.52931	0.59927	0.832514	0.588548	0.705706	0.386122	0.501069	0.477343	0.805154	0.62213	0.593647	0.57394	0.476852	0.628253	0.478147	0.627741	0.535523	0.496759	0.627253	0.641781	0.47202	0.568113	0.590027	0.383951	0.593793	0.688571	0.581877	0.792414	0.579329	0.621929	0.738535	0.462216	0.563562	0.572242	0.735551	0.611045
cg14903017	0.592809	0.730009	0.647926	0.686785	0.681641	0.620752	0.618465	0.627343	0.61121	0.73284	0.66416	0.638718	0.718259	0.634731	0.76356	0.850332	0.694073	0.71945	0.633864	0.605298	0.610797	0.795338	0.60777	0.659199	0.5237	0.762282	0.564979	0.605319	0.712036	0.521427	0.491933	0.681069	0.497836	0.625507	0.739376	0.756766	0.608607	0.7118	0.635519	0.661795	0.793918	0.739496	0.726562	0.799176	0.735503	0.828931	0.6448	0.853841	0.637991
cg10077346	0.806611	0.753433	0.678598	0.85869	0.640296	0.877018	0.466642	0.521385	0.876414	0.831372	0.789042	0.888839	0.874691	0.778036	0.565636	0.702057	0.796361	0.87681	0.623574	0.824877	0.750853	0.885129	0.632718	0.700187	0.816443	0.909268	0.710047	0.683438	0.682559	0.814867	0.702441	0.921074	0.766587	0.801051	0.814717	0.868584	0.599354	0.777319	0.793064	0.849457	0.899793	0.794836	0.800026	0.901155	0.867863	0.870357	0.883264	0.95134	0.686786
cg12126686	0.766874	0.783924	0.805767	0.795986	0.717952	0.731589	0.813853	0.776513	0.775778	0.716666	0.794226	0.69188	0.677984	0.790736	0.762778	0.544761	0.791786	0.73961	0.837612	0.79516	0.814313	0.598206	0.799009	0.773628	0.779053	0.812424	0.734004	0.690084	0.624966	0.725987	0.707782	0.701658	0.799839	0.819277	0.815662	0.802056	0.809547	0.719089	0.715228	0.636161	0.477447	0.733274	0.703548	0.594446	0.728946	0.716793	0.783446	0.551328	0.664235
cg19334176	0.504036	0.433609	0.399753	0.452602	0.556223	0.481045	0.284047	0.437256	0.5807	0.508219	0.512346	0.535286	0.561008	0.468898	0.532438	0.612591	0.539166	0.53013	0.419597	0.478014	0.370746	0.560185	0.530094	0.516358	0.538972	0.369263	0.50722	0.465487	0.606569	0.536502	0.515878	0.587989	0.466452	0.377293	0.423937	0.484209	0.400102	0.510693	0.619168	0.555628	0.637805	0.467598	0.443672	0.621587	0.473277	0.661575	0.513198	0.662431	0.515936
cg09088633	0.555594	0.46174	0.358699	0.512737	0.638886	0.570748	0.169396	0.434233	0.650414	0.60321	0.517775	0.59473	0.605466	0.459381	0.610261	0.746643	0.594092	0.67451	0.389102	0.474006	0.490059	0.780619	0.538869	0.525211	0.520734	0.531779	0.571518	0.529703	0.613318	0.5788	0.524576	0.647851	0.487915	0.434909	0.471444	0.499071	0.383696	0.536794	0.60025	0.584471	0.844855	0.477263	0.502852	0.717886	0.463409	0.58465	0.597638	0.742482	0.593125
cg21603432	0.539234	0.482387	0.379917	0.504923	0.631582	0.539457	0.262569	0.496793	0.645321	0.598794	0.522357	0.590579	0.583485	0.52576	0.575663	0.727382	0.620441	0.571819	0.394538	0.506824	0.495142	0.70728	0.51065	0.573605	0.574893	0.454865	0.600637	0.516371	0.596138	0.531965	0.469783	0.604163	0.581261	0.453258	0.532533	0.547972	0.42108	0.55607	0.647089	0.544097	0.740604	0.583927	0.552661	0.698285	0.449492	0.583439	0.54037	0.690532	0.590744
cg04763057	0.46749	0.449951	0.341235	0.530893	0.53577	0.538375	0.134743	0.434879	0.543448	0.541107	0.468242	0.513233	0.54326	0.419887	0.522449	0.745611	0.496814	0.703335	0.304621	0.382705	0.387698	0.756575	0.416335	0.542082	0.463508	0.351193	0.499406	0.390264	0.582303	0.504041	0.452597	0.55639	0.563881	0.404932	0.440497	0.493713	0.359379	0.462514	0.471718	0.515368	0.734585	0.552679	0.46237	0.633821	0.42644	0.48761	0.517878	0.661563	0.551075
cg09051789	0.497921	0.422634	0.334954	0.494368	0.516653	0.578344	0.129212	0.396484	0.585311	0.524511	0.44859	0.498966	0.542127	0.424031	0.547305	0.770157	0.588453	0.608101	0.27667	0.378436	0.479227	0.742853	0.450707	0.565908	0.445692	0.369126	0.507854	0.378883	0.584002	0.498518	0.40593	0.499549	0.49511	0.362968	0.460407	0.476399	0.317791	0.487191	0.488932	0.56934	0.731906	0.542219	0.453356	0.683812	0.415779	0.535027	0.500462	0.654941	0.541638
cg03634145	0.509997	0.469332	0.486182	0.592136	0.507047	0.534586	0.346005	0.425764	0.571196	0.548953	0.436048	0.633368	0.613903	0.441186	0.559168	0.528467	0.522147	0.630665	0.55263	0.481071	0.423955	0.560995	0.368085	0.474945	0.462741	0.538024	0.527421	0.557827	0.584515	0.416153	0.567429	0.720118	0.445167	0.471789	0.486818	0.51519	0.430257	0.483852	0.509769	0.623866	0.8041	0.376464	0.44798	0.700267	0.458525	0.591144	0.533979	0.745932	0.577179
cg10500219	0.48836	0.383335	0.367473	0.491207	0.495528	0.484897	0.191746	0.385671	0.535638	0.491929	0.417275	0.540265	0.50072	0.421372	0.503185	0.637351	0.456942	0.578599	0.330517	0.400845	0.365188	0.606144	0.420591	0.514577	0.474563	0.3628	0.501504	0.48154	0.575759	0.466165	0.483062	0.579766	0.404329	0.379312	0.439474	0.47278	0.303845	0.454932	0.46826	0.474038	0.709872	0.445034	0.413656	0.621054	0.381199	0.475184	0.436417	0.698838	0.471136
cg02280693	0.547788	0.461933	0.445474	0.54621	0.557297	0.587497	0.27628	0.45841	0.61164	0.56025	0.531176	0.635179	0.61319	0.469897	0.567191	0.790956	0.523692	0.655089	0.37302	0.406645	0.49864	0.748308	0.503058	0.587636	0.51327	0.447067	0.59307	0.513598	0.603121	0.589503	0.475432	0.621102	0.550264	0.388838	0.479442	0.546518	0.413492	0.515689	0.516446	0.587761	0.75448	0.573291	0.507288	0.688572	0.4878	0.548652	0.572766	0.712542	0.558066
cg19980260	0.472344	0.373256	0.292237	0.470577	0.523965	0.519504	0.164155	0.405116	0.523118	0.503512	0.445048	0.511507	0.511762	0.400147	0.522732	0.754336	0.488196	0.575501	0.296654	0.334486	0.377608	0.640487	0.365189	0.550455	0.421197	0.315788	0.497627	0.405928	0.55518	0.508788	0.398127	0.473838	0.476431	0.298537	0.408511	0.464865	0.292759	0.415299	0.469044	0.514192	0.697028	0.466037	0.397616	0.609917	0.333063	0.441593	0.440913	0.59541	0.46823
cg13217675	0.263112	0.261572	0.191785	0.343233	0.352806	0.388247	0.119278	0.226926	0.388156	0.360232	0.285341	0.368729	0.355387	0.217742	0.366129	0.54208	0.385026	0.412701	0.142704	0.215624	0.172482	0.437411	0.156554	0.338244	0.22656	0.271378	0.279048	0.38423	0.365438	0.333995	0.253503	0.47399	0.262892	0.176429	0.199433	0.243307	0.186519	0.224101	0.203396	0.333454	0.617584	0.281575	0.200465	0.457878	0.214745	0.26389	0.273684	0.607362	0.307124
cg08275271	0.50349	0.450635	0.490624	0.552923	0.521161	0.505146	0.476224	0.467318	0.524264	0.519258	0.473077	0.570708	0.596962	0.465351	0.543455	0.513276	0.538096	0.512189	0.524753	0.456953	0.438625	0.543292	0.462486	0.498405	0.608644	0.470472	0.509851	0.681601	0.616236	0.534109	0.555841	0.71471	0.471983	0.465687	0.531194	0.45447	0.399807	0.540276	0.496444	0.493268	0.697624	0.436196	0.443801	0.644557	0.448636	0.473104	0.507993	0.726815	0.522841
cg12818023	0.561811	0.554373	0.389147	0.559423	0.681366	0.636373	0.299852	0.469287	0.657488	0.631114	0.632452	0.626385	0.665295	0.514458	0.645668	0.755314	0.652527	0.770397	0.566273	0.459448	0.511544	0.795985	0.561107	0.629534	0.629228	0.598441	0.568048	0.580318	0.652066	0.601413	0.531738	0.689823	0.52183	0.529759	0.472923	0.516535	0.497282	0.645723	0.701955	0.595876	0.836488	0.613657	0.543018	0.760282	0.556994	0.640846	0.584477	0.808921	0.717365
cg10240150	0.654489	0.815531	0.761409	0.694318	0.728998	0.674371	0.8699	0.710318	0.729013	0.73785	0.771399	0.675473	0.760727	0.748873	0.691385	0.550461	0.780544	0.617527	0.806789	0.793037	0.699589	0.566175	0.678521	0.676297	0.712048	0.824765	0.65611	0.745628	0.686111	0.713959	0.757203	0.635844	0.713581	0.776928	0.770002	0.743784	0.805643	0.7763	0.688197	0.660731	0.502103	0.648501	0.64406	0.573369	0.75129	0.671983	0.687467	0.623839	0.696982
cg14532395	0.445975	0.406948	0.318242	0.475889	0.50445	0.539058	0.171281	0.403166	0.548202	0.525208	0.412084	0.439918	0.511651	0.421489	0.44603	0.610153	0.435731	0.555918	0.311189	0.347007	0.415692	0.660615	0.421504	0.510784	0.506857	0.278594	0.473084	0.41004	0.576079	0.466743	0.393399	0.580226	0.509949	0.356065	0.396804	0.445018	0.30806	0.410719	0.449585	0.514528	0.720418	0.467143	0.481619	0.584667	0.341294	0.489959	0.436496	0.627653	0.446906
cg14065857	0.527184	0.515588	0.510122	0.539484	0.466523	0.560249	0.310216	0.380969	0.55452	0.553479	0.457439	0.696847	0.597239	0.527629	0.539992	0.591146	0.542636	0.63511	0.55448	0.438559	0.430363	0.664961	0.441569	0.337161	0.493727	0.597434	0.593175	0.473246	0.579033	0.545651	0.506923	0.63338	0.415328	0.326359	0.530692	0.504022	0.382095	0.542629	0.530678	0.600611	0.721833	0.391465	0.465088	0.632842	0.500174	0.502489	0.532237	0.658853	0.554729
cg23548201	0.632327	0.635079	0.55764	0.638749	0.736495	0.694882	0.348829	0.61051	0.803481	0.717273	0.606633	0.643635	0.693012	0.591954	0.662951	0.839398	0.631031	0.738597	0.507718	0.586596	0.605267	0.89207	0.639675	0.680017	0.657833	0.631614	0.618322	0.718231	0.729511	0.672359	0.553194	0.783796	0.640815	0.530334	0.577663	0.612913	0.480789	0.608032	0.721342	0.691824	0.90621	0.649143	0.671058	0.810957	0.564138	0.690744	0.674815	0.875698	0.682623
cg17898536	0.485343	0.489228	0.536767	0.461739	0.528223	0.530239	0.419813	0.402844	0.517575	0.596841	0.532576	0.49868	0.57568	0.460244	0.579641	0.592318	0.458525	0.517192	0.523975	0.462092	0.378416	0.587021	0.296118	0.503786	0.517112	0.471587	0.4592	0.609225	0.574102	0.491024	0.560204	0.730381	0.334375	0.511207	0.544256	0.456377	0.455809	0.514695	0.569879	0.545332	0.760666	0.439387	0.43289	0.6074	0.535077	0.47343	0.516571	0.758882	0.4536
cg22064834	0.208512	0.130818	0.130504	0.185708	0.157913	0.290772	0.0516516	0.0716434	0.211857	0.223895	0.177872	0.222758	0.271261	0.146702	0.183755	0.265611	0.220488	0.320927	0.0412996	0.0930134	0.147549	0.262303	0.118325	0.149166	0.121706	0.147853	0.215495	0.160606	0.279744	0.146495	0.188061	0.215474	0.115454	0.0702915	0.157546	0.0810644	0.0907191	0.195096	0.199047	0.251848	0.460416	0.0734884	0.170665	0.344533	0.148282	0.114048	0.167532	0.475725	0.174203
cg19743778	0.675071	0.730218	0.76259	0.74234	0.636616	0.637779	0.78036	0.698277	0.660703	0.696354	0.69426	0.601836	0.630329	0.68886	0.677755	0.684384	0.602102	0.596208	0.820107	0.732108	0.791456	0.591605	0.670649	0.68135	0.700779	0.67176	0.592321	0.616825	0.612005	0.647872	0.691365	0.584067	0.713703	0.728047	0.716382	0.69969	0.748811	0.63196	0.556856	0.613094	0.468556	0.635516	0.593759	0.500578	0.746518	0.614826	0.664836	0.512764	0.64004
cg01879260	0.493967	0.444864	0.386261	0.490295	0.530479	0.563581	0.302817	0.401801	0.573326	0.522011	0.442583	0.534998	0.482196	0.488635	0.569663	0.538904	0.552295	0.592009	0.438936	0.438994	0.374804	0.606064	0.488146	0.571637	0.4521	0.375309	0.510238	0.46848	0.627907	0.47265	0.441687	0.58273	0.437633	0.439827	0.450075	0.368232	0.314459	0.49247	0.478677	0.563197	0.708881	0.39803	0.445033	0.641727	0.495384	0.479726	0.492458	0.695585	0.536719
cg24849633	0.593322	0.492394	0.50032	0.563982	0.568363	0.623439	0.346474	0.537503	0.636711	0.609943	0.554318	0.524121	0.560077	0.532548	0.514204	0.816116	0.601061	0.587025	0.474805	0.442521	0.539909	0.692143	0.527879	0.564276	0.611586	0.558673	0.571318	0.618744	0.606634	0.445672	0.581166	0.715121	0.59573	0.501769	0.505423	0.571237	0.515522	0.539137	0.602137	0.579505	0.756054	0.543504	0.519185	0.684782	0.543542	0.557828	0.531085	0.767334	0.526247
cg11540855	0.640407	0.705821	0.69489	0.700876	0.592427	0.629045	0.795104	0.734754	0.63505	0.621413	0.663268	0.571702	0.539893	0.695084	0.573242	0.684812	0.623061	0.627952	0.676281	0.678688	0.769283	0.51845	0.670899	0.669535	0.734672	0.664071	0.660357	0.445197	0.55903	0.615201	0.644163	0.449607	0.802812	0.73048	0.730372	0.741064	0.774685	0.626992	0.527991	0.524189	0.306931	0.721978	0.569238	0.481382	0.655309	0.715156	0.631466	0.403142	0.531789
cg19225848	0.494085	0.46402	0.368467	0.467812	0.562733	0.509258	0.292075	0.457765	0.588141	0.538008	0.494075	0.520846	0.552546	0.484144	0.512359	0.592812	0.551117	0.593774	0.424979	0.460097	0.430304	0.631344	0.542545	0.562286	0.535505	0.414063	0.555316	0.492059	0.628395	0.541209	0.508026	0.54792	0.491491	0.432147	0.477531	0.497571	0.411716	0.541434	0.614515	0.519474	0.728135	0.48256	0.508524	0.633905	0.472378	0.514513	0.492612	0.676047	0.564633
cg12090505	0.318312	0.215904	0.219661	0.339743	0.292657	0.320863	0.0746107	0.212435	0.271749	0.322362	0.256425	0.340023	0.319576	0.231128	0.393058	0.320146	0.374009	0.452185	0.142329	0.21102	0.193278	0.391376	0.233722	0.345521	0.278436	0.20469	0.318531	0.248222	0.340712	0.301582	0.271608	0.336772	0.280129	0.193144	0.201483	0.280538	0.152629	0.257007	0.263793	0.390628	0.509705	0.267622	0.242137	0.423273	0.263787	0.307689	0.292572	0.497584	0.34229
cg01443755	0.530092	0.482267	0.543606	0.533373	0.513417	0.455279	0.644769	0.667169	0.529043	0.387564	0.569076	0.437093	0.449383	0.592566	0.450762	0.410784	0.513711	0.517681	0.541814	0.619948	0.617696	0.257257	0.528208	0.423911	0.618757	0.537921	0.600615	0.304074	0.472231	0.457773	0.60276	0.249524	0.578351	0.646936	0.648532	0.676366	0.635719	0.511394	0.45898	0.401781	0.174492	0.545141	0.437795	0.293166	0.310232	0.550508	0.587806	0.252075	0.575933
cg21583986	0.391214	0.303399	0.24719	0.412244	0.379394	0.4129	0.134219	0.307178	0.447203	0.408058	0.379972	0.411551	0.453609	0.339589	0.410385	0.515744	0.474933	0.533599	0.251742	0.270969	0.305385	0.588185	0.29662	0.421216	0.360189	0.282853	0.416835	0.277501	0.436708	0.425351	0.333947	0.38617	0.399321	0.250637	0.326239	0.358265	0.255725	0.372854	0.397794	0.407403	0.594868	0.36725	0.340741	0.518451	0.300542	0.405779	0.337999	0.549185	0.3764
cg08628635	0.534529	0.451121	0.335879	0.546377	0.579715	0.602628	0.158126	0.465505	0.60681	0.573911	0.505606	0.566304	0.589888	0.477766	0.573131	0.748537	0.576034	0.655476	0.33515	0.433066	0.445697	0.779088	0.531973	0.593252	0.468624	0.517315	0.556719	0.442165	0.637995	0.565274	0.416216	0.54099	0.554039	0.363976	0.519479	0.468822	0.373429	0.506425	0.571746	0.545263	0.802405	0.566611	0.490214	0.718346	0.450066	0.556295	0.541372	0.683813	0.550173
cg17294228	0.49076	0.38442	0.329077	0.406849	0.560925	0.507829	0.229904	0.41149	0.559172	0.51807	0.4617	0.488271	0.501382	0.413157	0.496522	0.571865	0.495489	0.579902	0.35121	0.41678	0.354819	0.658588	0.502472	0.491344	0.452594	0.365325	0.498442	0.441883	0.606873	0.485349	0.430885	0.516846	0.381593	0.34912	0.431621	0.405537	0.339252	0.498737	0.585497	0.537483	0.754696	0.413093	0.452162	0.683493	0.422643	0.450695	0.475268	0.756569	0.529249
cg20321058	0.159356	0.207073	0.149055	0.214796	0.219072	0.212683	0.0248729	0.121458	0.246881	0.265791	0.18157	0.222181	0.282826	0.157779	0.21942	0.349472	0.123395	0.260032	0.104344	0.12249	0.122946	0.402779	0.116776	0.198573	0.226723	0.104629	0.174352	0.193134	0.258009	0.216969	0.180896	0.370272	0.169114	0.0982083	0.103617	0.145379	0.105177	0.190708	0.229853	0.255593	0.521486	0.183383	0.12226	0.319896	0.139924	0.167553	0.173031	0.483109	0.197956
cg27530093	0.372757	0.375767	0.333111	0.37592	0.41796	0.450541	0.183912	0.303107	0.456646	0.467774	0.39778	0.42206	0.465107	0.352596	0.424288	0.570122	0.399174	0.423631	0.324571	0.341579	0.280914	0.510629	0.276791	0.394202	0.438408	0.359002	0.373577	0.569567	0.455778	0.442623	0.450023	0.573325	0.335554	0.306944	0.333415	0.35915	0.300637	0.397661	0.418232	0.460529	0.627251	0.36713	0.363889	0.524883	0.35885	0.373225	0.353406	0.686095	0.413488
cg23111342	0.472503	0.275567	0.246744	0.368304	0.514031	0.448511	0.101037	0.27283	0.567185	0.429093	0.329773	0.429509	0.480047	0.386673	0.481487	0.486906	0.401153	0.572267	0.277914	0.422053	0.238782	0.588881	0.392002	0.502964	0.413388	0.340505	0.469288	0.455067	0.528966	0.402892	0.355326	0.504888	0.30934	0.256055	0.293634	0.401313	0.211596	0.455753	0.624983	0.470156	0.763975	0.367207	0.367403	0.663273	0.341825	0.419057	0.421726	0.743889	0.50613
cg02590572	0.820782	0.904858	0.903798	0.798166	0.861557	0.796324	0.940412	0.891379	0.82187	0.871054	0.894883	0.769465	0.840351	0.867748	0.791988	0.781816	0.832704	0.74489	0.875564	0.887603	0.89567	0.789308	0.860315	0.834177	0.866472	0.915742	0.787897	0.843427	0.77017	0.82551	0.853107	0.769616	0.850877	0.912865	0.891237	0.880762	0.923371	0.914552	0.805498	0.745685	0.617822	0.858284	0.81672	0.707339	0.89414	0.862725	0.824719	0.734372	0.843585
cg20954870	0.546282	0.503109	0.370533	0.559362	0.646954	0.571847	0.243355	0.515572	0.675097	0.601749	0.536824	0.62101	0.580477	0.523267	0.544307	0.809317	0.523042	0.655373	0.393139	0.488215	0.546257	0.803104	0.530036	0.581634	0.519008	0.498742	0.593284	0.451819	0.660286	0.593051	0.525739	0.65377	0.567122	0.423697	0.501021	0.556127	0.397449	0.569774	0.658682	0.570592	0.81073	0.58881	0.554849	0.721437	0.466399	0.59859	0.523732	0.777075	0.597314
cg04712122	0.734507	0.728883	0.720658	0.678978	0.712765	0.717433	0.768544	0.74866	0.7495	0.718903	0.780231	0.65043	0.797534	0.776806	0.7946	0.500533	0.741699	0.706308	0.874777	0.853139	0.705154	0.551486	0.673519	0.707871	0.78252	0.863928	0.658047	0.768313	0.76492	0.683193	0.760749	0.652207	0.746413	0.765878	0.763327	0.751765	0.839578	0.77454	0.718396	0.682077	0.533337	0.649471	0.616091	0.609186	0.734055	0.603943	0.727751	0.63872	0.688239
cg05755646	0.521239	0.49217	0.420976	0.540522	0.606558	0.540964	0.239622	0.49021	0.63352	0.592541	0.522544	0.564875	0.577088	0.491364	0.539459	0.693852	0.587852	0.654911	0.381411	0.489473	0.461791	0.739834	0.490945	0.569059	0.536518	0.465322	0.530362	0.478972	0.678758	0.562684	0.534359	0.601917	0.581715	0.407884	0.510719	0.560675	0.427067	0.528766	0.59537	0.56751	0.771043	0.544916	0.513457	0.687805	0.457413	0.60994	0.527888	0.68633	0.588506
cg02927990	0.645448	0.742374	0.719596	0.647466	0.632544	0.659959	0.769403	0.767578	0.691374	0.679425	0.71514	0.593015	0.665051	0.683676	0.634837	0.512383	0.638827	0.585234	0.838617	0.748768	0.717121	0.511964	0.587303	0.639501	0.723464	0.681416	0.628198	0.631487	0.594836	0.623502	0.733308	0.618434	0.772075	0.761353	0.720501	0.759119	0.782162	0.680339	0.591532	0.564568	0.46104	0.648593	0.613833	0.512925	0.707612	0.709096	0.645635	0.529764	0.628167
cg26335752	0.554546	0.538186	0.453851	0.563376	0.596546	0.607642	0.318444	0.507675	0.621888	0.62593	0.534121	0.634598	0.584096	0.533235	0.615952	0.805059	0.528037	0.648361	0.419823	0.499119	0.541415	0.783128	0.48803	0.616949	0.539329	0.549146	0.587607	0.525643	0.61648	0.588895	0.520875	0.672426	0.598398	0.470931	0.530175	0.590537	0.417199	0.558877	0.593512	0.638744	0.79224	0.592282	0.508915	0.722032	0.499259	0.601236	0.602217	0.716101	0.571959
cg22593687	0.409176	0.415774	0.294271	0.507276	0.480378	0.460183	0.155205	0.36112	0.442154	0.461371	0.416875	0.447991	0.387143	0.330988	0.487156	0.504465	0.460047	0.588766	0.257004	0.459906	0.429616	0.652115	0.388711	0.459453	0.348745	0.382192	0.414929	0.364936	0.485582	0.493733	0.34919	0.506294	0.539461	0.366459	0.388291	0.349596	0.266193	0.381217	0.432532	0.426053	0.690224	0.497543	0.380239	0.557684	0.358462	0.457222	0.414881	0.567242	0.431325
cg25303955	0.606816	0.597782	0.577475	0.596225	0.59713	0.715579	0.493968	0.573885	0.594451	0.610708	0.619928	0.706203	0.663473	0.526334	0.718429	0.842123	0.576076	0.637861	0.540271	0.499557	0.617152	0.710574	0.594238	0.64398	0.564902	0.684175	0.580315	0.731383	0.71222	0.594138	0.573557	0.788207	0.536432	0.557775	0.593872	0.631839	0.536956	0.629383	0.597885	0.701256	0.758734	0.590867	0.582917	0.752966	0.492257	0.631911	0.623711	0.768863	0.622665
cg15193638	0.469449	0.486641	0.477533	0.570943	0.56859	0.580377	0.219681	0.364912	0.559629	0.527308	0.468235	0.529833	0.48113	0.412836	0.601496	0.869955	0.446148	0.529091	0.225975	0.360886	0.406295	0.714785	0.349715	0.449364	0.488729	0.53849	0.387408	0.582914	0.591445	0.550439	0.386089	0.920747	0.446009	0.29804	0.40489	0.406288	0.350895	0.405818	0.443702	0.464483	0.818394	0.493513	0.438702	0.688874	0.298496	0.420318	0.389659	0.87967	0.493137
cg14473838	0.682301	0.786711	0.731766	0.744938	0.691107	0.671898	0.796733	0.779083	0.729179	0.72557	0.733901	0.660089	0.63248	0.744925	0.632222	0.618046	0.726336	0.610055	0.795975	0.725911	0.779935	0.538789	0.631097	0.730368	0.7562	0.716789	0.718025	0.689964	0.662278	0.682831	0.772233	0.669495	0.786935	0.790975	0.694979	0.746829	0.774572	0.72304	0.619163	0.622302	0.440713	0.779781	0.71589	0.57344	0.702725	0.728332	0.716693	0.563892	0.668338
cg24831110	0.516386	0.395677	0.392025	0.493878	0.544248	0.507228	0.251617	0.374604	0.553754	0.520525	0.466859	0.564623	0.553623	0.467734	0.552576	0.542865	0.524749	0.601661	0.445708	0.456385	0.424958	0.610607	0.458726	0.511575	0.442832	0.536317	0.570015	0.493265	0.608656	0.53701	0.511956	0.587716	0.437485	0.427428	0.458162	0.480842	0.358083	0.490293	0.521464	0.551676	0.714106	0.431059	0.475058	0.658709	0.509625	0.504596	0.531227	0.721384	0.538767
cg06847344	0.434027	0.368177	0.314946	0.436687	0.457524	0.511196	0.146743	0.345779	0.515996	0.472805	0.396219	0.457067	0.481853	0.390439	0.48984	0.593187	0.4644	0.519446	0.321194	0.348497	0.358285	0.653582	0.289595	0.459765	0.447621	0.370795	0.442044	0.356198	0.52238	0.447597	0.394444	0.49635	0.402554	0.313584	0.367262	0.389728	0.292962	0.421478	0.421271	0.47147	0.716648	0.457984	0.39595	0.605273	0.368865	0.482071	0.438241	0.60495	0.457028
cg20497682	0.467263	0.413365	0.391301	0.474975	0.495687	0.533995	0.185203	0.399871	0.563207	0.491623	0.42874	0.464519	0.472049	0.403516	0.445932	0.735747	0.47161	0.506261	0.331931	0.36559	0.404436	0.608566	0.382109	0.512436	0.418375	0.370907	0.453592	0.552293	0.438316	0.457377	0.390726	0.682748	0.472745	0.400233	0.401999	0.430282	0.342002	0.412928	0.419365	0.465036	0.74629	0.419747	0.436195	0.594511	0.404772	0.481369	0.482666	0.674023	0.487985
cg09369619	0.202998	0.12772	0.145215	0.174714	0.18901	0.276345	0.0300843	0.09606	0.24592	0.169893	0.142055	0.244323	0.278874	0.146413	0.244261	0.332586	0.241807	0.277006	0.0997737	0.0982804	0.130767	0.287053	0.20171	0.192114	0.182417	0.156938	0.224872	0.197036	0.283265	0.216214	0.171262	0.283274	0.15589	0.126656	0.11253	0.175113	0.0558627	0.162325	0.178056	0.234235	0.459804	0.176594	0.200191	0.336676	0.161231	0.118743	0.199905	0.388595	0.209061
cg04068159	0.524464	0.457125	0.401871	0.518333	0.556959	0.565407	0.216434	0.448361	0.603218	0.578541	0.483429	0.539345	0.584215	0.462873	0.503534	0.799904	0.600986	0.652013	0.379314	0.395693	0.444926	0.730605	0.472165	0.569831	0.491386	0.473337	0.548323	0.444301	0.635656	0.539486	0.437945	0.597116	0.54166	0.417544	0.486858	0.518412	0.353531	0.549086	0.502474	0.555632	0.77982	0.537364	0.499736	0.703852	0.414056	0.520763	0.548045	0.734993	0.50794
cg00014561	0.49989	0.496131	0.440694	0.497801	0.522663	0.539071	0.300099	0.417924	0.564424	0.57756	0.491949	0.593233	0.527713	0.444086	0.524024	0.653366	0.460026	0.545448	0.442252	0.460148	0.38677	0.646194	0.403541	0.501789	0.544641	0.456854	0.456885	0.613599	0.60889	0.538446	0.5243	0.701354	0.447408	0.408654	0.51509	0.465771	0.473229	0.467337	0.516708	0.561848	0.745934	0.422755	0.469606	0.640861	0.514081	0.474784	0.495971	0.728155	0.47355
cg24774517	0.132394	0.143589	0.109697	0.180286	0.159247	0.176646	0.0431617	0.0959287	0.17494	0.198325	0.14326	0.175187	0.178847	0.094857	0.165252	0.275266	0.136263	0.20284	0.0756332	0.0863998	0.129456	0.248699	0.130341	0.190195	0.0763285	0.155497	0.137183	0.194934	0.208907	0.177361	0.148402	0.311585	0.123824	0.0652336	0.0706177	0.0723935	0.0521121	0.139229	0.19244	0.223342	0.425684	0.122274	0.144664	0.267036	0.0952337	0.149701	0.154369	0.378322	0.20296
cg11745838	0.510665	0.469678	0.364681	0.562573	0.55734	0.570346	0.196109	0.464442	0.617745	0.55806	0.492771	0.562044	0.594261	0.469787	0.534126	0.783861	0.581011	0.61272	0.310376	0.458639	0.461312	0.782725	0.48513	0.585284	0.489912	0.384648	0.583744	0.422488	0.578838	0.545375	0.446696	0.526766	0.621191	0.372679	0.485365	0.522893	0.340404	0.488531	0.520392	0.519193	0.791539	0.570895	0.464803	0.677241	0.455245	0.552575	0.504754	0.698337	0.542434
cg13790326	0.445634	0.409341	0.326497	0.475986	0.488983	0.503984	0.131887	0.380569	0.500091	0.491053	0.45264	0.497331	0.495761	0.410499	0.497123	0.629491	0.504808	0.543579	0.318498	0.370573	0.439514	0.662	0.417671	0.514199	0.432368	0.345338	0.521572	0.392466	0.493444	0.46136	0.397089	0.50591	0.483871	0.368161	0.423415	0.450805	0.300598	0.369463	0.464833	0.451763	0.719282	0.470173	0.454001	0.602243	0.357379	0.484796	0.430825	0.624152	0.476461
cg06566905	0.421057	0.288555	0.248015	0.387347	0.418244	0.475171	0.12796	0.332709	0.427265	0.367479	0.345399	0.432961	0.420663	0.381603	0.408694	0.46909	0.464863	0.482894	0.270394	0.310716	0.297486	0.481129	0.447722	0.468827	0.377665	0.341435	0.43657	0.372026	0.488306	0.421007	0.340558	0.446158	0.391459	0.317747	0.379155	0.398605	0.295204	0.361582	0.396115	0.426569	0.59249	0.390125	0.36903	0.544095	0.351152	0.410262	0.39805	0.554944	0.410353
cg18957138	0.0437857	0.0356009	0.0522634	0.0455822	0.0497341	0.0588134	0.0210567	0.0188904	0.0314315	0.0516409	0.0253268	0.0367592	0.081678	0.0191694	0.0737195	0.13467	0.0190074	0.0387719	0.0357486	0.0173446	0.0157598	0.069224	0.03212	0.0284837	0.0491165	0.0688563	0.0164053	0.222711	0.085023	0.0317403	0.110384	0.275543	0.0238717	0.0266568	0.0207465	0.0315963	0.0149109	0.0502315	0.0685241	0.0364177	0.275305	0.0395377	0.0245387	0.112748	0.0207762	0.0264802	0.0303445	0.3091	0.0250862
cg05209483	0.196006	0.106115	0.122238	0.1601	0.157582	0.207492	0.0465107	0.116286	0.183441	0.137346	0.151153	0.207336	0.150001	0.15159	0.198983	0.116235	0.261569	0.313735	0.0943988	0.116104	0.140178	0.215167	0.180649	0.221572	0.152423	0.110012	0.272618	0.144759	0.176736	0.162517	0.134084	0.205811	0.0776546	0.12348	0.126344	0.120487	0.0808677	0.118542	0.206303	0.19442	0.320545	0.15405	0.164656	0.289425	0.113843	0.117799	0.200815	0.333702	0.179164
cg05871756	0.457538	0.37315	0.294002	0.42661	0.470261	0.444992	0.240744	0.325033	0.532925	0.444158	0.462304	0.462604	0.521091	0.437672	0.450983	0.465687	0.458223	0.491695	0.363634	0.388197	0.39267	0.48822	0.424752	0.482308	0.427061	0.355051	0.539911	0.432306	0.555964	0.535162	0.424605	0.475158	0.432837	0.353015	0.462491	0.428289	0.333919	0.456331	0.545177	0.504298	0.581177	0.383722	0.423753	0.554392	0.43775	0.451423	0.478074	0.586878	0.504876
cg23182003	0.148501	0.193251	0.210586	0.178254	0.220371	0.192099	0.154546	0.106614	0.130955	0.112939	0.136283	0.230545	0.167645	0.197604	0.193323	0.147747	0.24578	0.195422	0.135509	0.128108	0.140403	0.141743	0.10556	0.145195	0.144436	0.156454	0.211538	0.306522	0.170788	0.0636456	0.16306	0.470094	0.0962573	0.0935302	0.167199	0.143766	0.0993887	0.204829	0.161031	0.140541	0.479773	0.151962	0.119969	0.266135	0.122763	0.170146	0.177391	0.403063	0.191837
cg07593390	0.70322	0.676	0.576985	0.703493	0.720163	0.755583	0.410299	0.498715	0.73623	0.782216	0.732222	0.743405	0.799685	0.537696	0.817879	0.856486	0.599905	0.782777	0.556508	0.716401	0.540905	0.890003	0.559734	0.705194	0.771538	0.688069	0.590945	0.87879	0.84589	0.805567	0.775208	0.904402	0.628694	0.568747	0.593807	0.543105	0.513439	0.736609	0.727741	0.794603	0.875113	0.591595	0.558594	0.792345	0.5961	0.661751	0.692701	0.88463	0.712987
cg06111286	0.331782	0.278824	0.216588	0.344116	0.368016	0.408613	0.0767506	0.28376	0.381915	0.361746	0.300897	0.372079	0.386985	0.358389	0.354067	0.562753	0.385363	0.482813	0.20471	0.267644	0.283272	0.531772	0.261624	0.456348	0.289244	0.252045	0.378593	0.252149	0.433948	0.35623	0.267934	0.390563	0.293706	0.236277	0.313341	0.229295	0.15127	0.322852	0.350038	0.452896	0.592897	0.245223	0.279344	0.472888	0.301459	0.259384	0.362472	0.476427	0.360018
cg10707774	0.778742	0.832748	0.84044	0.736899	0.77431	0.778683	0.914282	0.794901	0.778715	0.789797	0.811338	0.741477	0.774713	0.796568	0.782781	0.645116	0.767674	0.718647	0.882156	0.843996	0.840669	0.660765	0.823969	0.779768	0.819478	0.858431	0.767278	0.765928	0.71434	0.737069	0.805713	0.736033	0.83409	0.880181	0.803972	0.84529	0.875561	0.818902	0.802542	0.736885	0.517976	0.79265	0.72217	0.649961	0.804076	0.812555	0.812763	0.58456	0.784433
cg15961455	0.552474	0.515722	0.423922	0.529316	0.600227	0.660792	0.193846	0.516614	0.670334	0.613131	0.467162	0.590548	0.56122	0.514111	0.527949	0.779955	0.569798	0.657478	0.41743	0.509902	0.465943	0.776951	0.569262	0.662936	0.492389	0.417645	0.618224	0.425719	0.667489	0.539685	0.472094	0.605385	0.606459	0.487156	0.530833	0.551398	0.41152	0.559468	0.585677	0.598259	0.763252	0.669739	0.51144	0.74454	0.402088	0.628344	0.521375	0.675354	0.520353
cg14167506	0.357031	0.233748	0.202946	0.284459	0.340632	0.33688	0.101035	0.187319	0.337209	0.324195	0.277344	0.402511	0.360893	0.268151	0.387163	0.368013	0.391021	0.377338	0.211307	0.239259	0.174657	0.477209	0.309702	0.286625	0.265058	0.266375	0.410686	0.249439	0.454135	0.353807	0.235245	0.390555	0.181882	0.153701	0.30124	0.16554	0.192777	0.335818	0.366889	0.446299	0.536884	0.220352	0.192237	0.456218	0.290236	0.27317	0.306671	0.514891	0.26637
cg26752773	0.522751	0.47039	0.382963	0.5135	0.566284	0.581652	0.211087	0.483056	0.59766	0.588246	0.507111	0.530168	0.576085	0.490541	0.548906	0.779228	0.598557	0.592219	0.323084	0.458439	0.45698	0.755282	0.512768	0.596583	0.532997	0.40694	0.558581	0.442374	0.614479	0.560693	0.388323	0.574044	0.576611	0.400367	0.494631	0.537164	0.378864	0.505926	0.541518	0.566059	0.7372	0.546978	0.503907	0.698815	0.441218	0.55785	0.532443	0.63066	0.524087
cg13003415	0.472664	0.420831	0.414852	0.495859	0.469373	0.52693	0.290177	0.401924	0.502111	0.483493	0.456087	0.576547	0.530212	0.392291	0.469888	0.50042	0.498697	0.532621	0.328093	0.438101	0.366456	0.614183	0.380085	0.432593	0.420007	0.494607	0.453499	0.474632	0.535546	0.479446	0.474981	0.608877	0.373896	0.325079	0.373938	0.434619	0.397586	0.410554	0.475732	0.518523	0.67566	0.439231	0.419298	0.594532	0.452394	0.469872	0.457858	0.664081	0.551218
cg07015947	0.490424	0.507411	0.481575	0.516946	0.558832	0.516561	0.362889	0.432987	0.56071	0.555161	0.515461	0.585489	0.609046	0.440336	0.583277	0.593671	0.5477	0.471128	0.491557	0.512383	0.351658	0.547883	0.392939	0.452357	0.595742	0.505142	0.440318	0.643735	0.606462	0.540432	0.529076	0.663924	0.354149	0.462104	0.424697	0.467322	0.513525	0.484659	0.559458	0.596995	0.712566	0.387321	0.435973	0.612658	0.440637	0.519446	0.469072	0.71701	0.57696
cg19225798	0.420358	0.30651	0.241969	0.3848	0.430429	0.407898	0.147616	0.329199	0.454843	0.398894	0.365337	0.415105	0.462554	0.36774	0.467809	0.455484	0.477255	0.501782	0.320568	0.367447	0.279562	0.484821	0.433047	0.427468	0.397305	0.414498	0.458026	0.425455	0.451548	0.429472	0.415647	0.493128	0.385215	0.289787	0.361538	0.353762	0.289344	0.455866	0.49893	0.444815	0.678901	0.354672	0.386629	0.569197	0.363485	0.377459	0.429395	0.591456	0.483703
cg26094195	0.709566	0.449631	0.46847	0.580271	0.56233	0.579987	0.268015	0.460197	0.838043	0.6061	0.502416	0.525671	0.62855	0.473389	0.593717	0.846591	0.611415	0.80082	0.430954	0.438777	0.522972	0.746914	0.4182	0.571668	0.565286	0.570341	0.456759	0.774055	0.650491	0.613066	0.51105	0.827758	0.603898	0.439818	0.482895	0.538958	0.484529	0.82622	0.572851	0.560129	0.844399	0.490617	0.761022	0.721948	0.430186	0.637937	0.513689	0.798098	0.551709
cg17296940	0.253388	0.259407	0.286819	0.195865	0.295543	0.27032	0.170587	0.190994	0.31302	0.31676	0.289797	0.282115	0.33237	0.237731	0.347666	0.221114	0.276627	0.252698	0.325695	0.229873	0.158903	0.241488	0.208895	0.294377	0.291532	0.253264	0.284135	0.39995	0.370948	0.297949	0.331074	0.421572	0.160531	0.22976	0.298121	0.16287	0.22127	0.325916	0.318062	0.334752	0.459646	0.192833	0.207126	0.358749	0.232669	0.20634	0.260013	0.435974	0.352065
cg03850957	0.43206	0.299694	0.294834	0.392599	0.419808	0.483259	0.159135	0.294393	0.46236	0.411615	0.389649	0.544539	0.482413	0.350326	0.495307	0.469085	0.480725	0.517074	0.306127	0.351135	0.307608	0.561407	0.36572	0.450094	0.395488	0.339188	0.452649	0.351443	0.50024	0.432934	0.371888	0.490647	0.272366	0.309456	0.311576	0.336544	0.191301	0.384654	0.425619	0.434024	0.698729	0.286571	0.347261	0.575061	0.371704	0.340458	0.406567	0.62147	0.425111
cg11458934	0.245409	0.147706	0.142423	0.256826	0.238984	0.232907	0.0924194	0.167224	0.246591	0.215756	0.197743	0.216472	0.281626	0.188767	0.282201	0.252051	0.250369	0.308303	0.173408	0.188352	0.143745	0.303422	0.236173	0.280682	0.248226	0.141457	0.26782	0.224296	0.301723	0.271692	0.192975	0.301325	0.175025	0.150676	0.190212	0.168945	0.123936	0.226836	0.25843	0.314999	0.398394	0.184985	0.210207	0.341942	0.226805	0.164942	0.249667	0.41378	0.255394
cg14375205	0.607086	0.582086	0.523344	0.620634	0.617003	0.667389	0.439035	0.612853	0.669417	0.625162	0.626718	0.621125	0.706291	0.555035	0.643422	0.718703	0.673868	0.633324	0.571971	0.577334	0.491698	0.709261	0.561995	0.58178	0.602739	0.720989	0.578161	0.751229	0.700816	0.662852	0.699117	0.738029	0.503429	0.565702	0.583179	0.572257	0.508507	0.610271	0.660397	0.688478	0.778675	0.526995	0.541691	0.7373	0.557605	0.635425	0.603333	0.819345	0.604692
cg06779020	0.341784	0.247665	0.188253	0.344585	0.358793	0.387457	0.0943248	0.244763	0.332437	0.344023	0.309655	0.37895	0.424755	0.259554	0.319354	0.62835	0.331637	0.406457	0.209438	0.231347	0.215945	0.542107	0.350745	0.412912	0.336693	0.176101	0.355513	0.26448	0.378064	0.359482	0.361642	0.361184	0.360939	0.246027	0.299092	0.335163	0.228173	0.31193	0.387339	0.386824	0.557127	0.327458	0.274755	0.464542	0.242745	0.329385	0.304123	0.535687	0.336683
cg24601412	0.322056	0.22289	0.256713	0.296419	0.287177	0.317432	0.17608	0.275905	0.33303	0.311801	0.294973	0.319468	0.358081	0.265672	0.358873	0.344465	0.314816	0.348872	0.281797	0.263428	0.229589	0.346225	0.28929	0.31138	0.324741	0.318744	0.330914	0.375737	0.366896	0.340315	0.329732	0.422297	0.21991	0.249745	0.296607	0.281844	0.233026	0.321654	0.312678	0.346242	0.466073	0.252929	0.252999	0.392226	0.298873	0.280891	0.295293	0.46078	0.333388
cg04871767	0.366951	0.31841	0.275707	0.369009	0.371725	0.411438	0.1448	0.338347	0.442643	0.436626	0.373216	0.404625	0.421607	0.336317	0.428449	0.569304	0.393307	0.441093	0.245003	0.305872	0.323572	0.556893	0.342998	0.441525	0.424356	0.236836	0.390375	0.318435	0.448324	0.409939	0.371261	0.421981	0.40284	0.27131	0.316764	0.401692	0.266664	0.375192	0.363792	0.418248	0.565825	0.421341	0.367078	0.4748	0.324972	0.401692	0.357182	0.531465	0.378999
cg03048622	0.346626	0.273833	0.230801	0.349258	0.410055	0.419071	0.0570305	0.234029	0.420959	0.407719	0.342471	0.452743	0.388692	0.247701	0.43887	0.6196	0.392226	0.470462	0.194709	0.228319	0.225749	0.563724	0.303237	0.346867	0.354214	0.355306	0.303204	0.379131	0.461604	0.415554	0.28896	0.595954	0.284861	0.216904	0.2658	0.29577	0.185836	0.342494	0.394275	0.464932	0.755725	0.344253	0.29528	0.556564	0.251027	0.363362	0.320004	0.664723	0.354094
cg07217750	0.224492	0.144593	0.139474	0.182667	0.139851	0.296703	0.0607292	0.179904	0.160684	0.179907	0.158421	0.169687	0.226246	0.228768	0.176227	0.200354	0.25706	0.275294	0.0972668	0.205859	0.088302	0.277948	0.193193	0.239904	0.242482	0.15606	0.254119	0.209481	0.275634	0.207826	0.244579	0.295131	0.23917	0.179753	0.18201	0.164751	0.114007	0.241288	0.265151	0.282384	0.427288	0.201757	0.233997	0.297074	0.184144	0.281012	0.194451	0.328565	0.159639
cg05214462	0.478909	0.423535	0.372419	0.506085	0.512981	0.486973	0.237881	0.438032	0.539444	0.50778	0.467993	0.525004	0.517591	0.462425	0.473074	0.613688	0.499494	0.51473	0.365001	0.393737	0.420097	0.631536	0.461754	0.558168	0.497452	0.383781	0.490859	0.438799	0.550258	0.533772	0.440129	0.556804	0.511799	0.383818	0.445602	0.497764	0.396902	0.465597	0.48238	0.490769	0.687987	0.464784	0.452512	0.593553	0.426496	0.513637	0.48815	0.617721	0.481149
cg20100970	0.249805	0.163042	0.150254	0.22416	0.253891	0.275653	0.0945487	0.177531	0.280581	0.279185	0.209699	0.281897	0.288432	0.191916	0.307174	0.32191	0.225987	0.315714	0.192507	0.208736	0.187956	0.319663	0.204935	0.287326	0.248317	0.173358	0.281772	0.261043	0.344092	0.287691	0.224076	0.339015	0.181326	0.171069	0.187446	0.189711	0.120424	0.213346	0.253173	0.29112	0.447801	0.214216	0.22182	0.347944	0.20313	0.194543	0.248689	0.388081	0.272162
cg03305190	0.750077	0.853981	0.83934	0.74939	0.76963	0.761274	0.869048	0.834466	0.784071	0.822111	0.813783	0.780519	0.792022	0.814675	0.733363	0.746788	0.787385	0.683177	0.83691	0.802025	0.843442	0.67582	0.734825	0.780531	0.764006	0.892847	0.759507	0.726076	0.746809	0.748187	0.86973	0.638857	0.873044	0.858208	0.831941	0.845259	0.872286	0.797823	0.759323	0.67117	0.52469	0.843738	0.694151	0.62198	0.801716	0.825171	0.769123	0.614117	0.739102
cg04515608	0.347465	0.334242	0.293998	0.358138	0.407481	0.364306	0.238352	0.373196	0.415192	0.405356	0.332836	0.378864	0.424923	0.349347	0.424008	0.48035	0.318779	0.501132	0.30021	0.302207	0.299983	0.445086	0.368948	0.385202	0.416581	0.246121	0.398463	0.344955	0.440241	0.355537	0.368114	0.438681	0.349851	0.306966	0.319544	0.272928	0.234426	0.318272	0.43621	0.417945	0.604167	0.348451	0.373211	0.493984	0.364198	0.364874	0.4312	0.517709	0.410211
cg14292522	0.406484	0.491201	0.405488	0.480267	0.505809	0.513132	0.367776	0.262133	0.473387	0.515936	0.438593	0.532993	0.524439	0.362727	0.58803	0.540829	0.465812	0.552499	0.384337	0.369447	0.325862	0.597968	0.32879	0.484798	0.459122	0.462895	0.434354	0.660336	0.523878	0.502947	0.513457	0.582208	0.339828	0.403784	0.407908	0.343126	0.360948	0.437857	0.473484	0.438834	0.713499	0.324448	0.421261	0.578318	0.426833	0.386892	0.4441	0.655368	0.529599
cg11119767	0.463417	0.418137	0.309823	0.489741	0.502373	0.540072	0.151314	0.376869	0.546826	0.50697	0.454708	0.519008	0.532523	0.40419	0.559205	0.662574	0.618951	0.621848	0.299447	0.353334	0.382545	0.736877	0.425892	0.546779	0.467948	0.309769	0.561901	0.367731	0.611345	0.521693	0.414106	0.527577	0.450136	0.321483	0.401159	0.462333	0.331387	0.466335	0.524806	0.528854	0.764033	0.499169	0.43605	0.680132	0.393477	0.493121	0.5204	0.699894	0.505166
cg27051231	0.4696	0.477045	0.337578	0.489568	0.548235	0.534639	0.168727	0.429448	0.586227	0.555804	0.458541	0.54976	0.490858	0.451709	0.502882	0.689237	0.514004	0.615267	0.303433	0.499216	0.463917	0.718204	0.46367	0.550539	0.466608	0.472549	0.555375	0.396276	0.556062	0.540569	0.437199	0.524613	0.536923	0.397105	0.507567	0.525485	0.371755	0.467158	0.534458	0.51888	0.755614	0.54331	0.517324	0.619673	0.404651	0.535064	0.506256	0.650484	0.575223
cg24292204	0.442607	0.323317	0.325944	0.37267	0.421476	0.46222	0.282277	0.352528	0.471764	0.435073	0.400513	0.403064	0.454275	0.378975	0.402656	0.495153	0.376648	0.491816	0.329043	0.356725	0.347103	0.479827	0.332098	0.458127	0.39188	0.374731	0.470728	0.372603	0.468649	0.438793	0.43674	0.466271	0.357765	0.324174	0.392767	0.410192	0.290669	0.401373	0.460703	0.453427	0.628025	0.385989	0.37844	0.543088	0.32339	0.387879	0.402338	0.570125	0.462422
cg02832237	0.208905	0.162569	0.15749	0.179026	0.227008	0.24806	0.0751929	0.108811	0.237329	0.267027	0.214622	0.313133	0.34546	0.177174	0.214463	0.2886	0.158903	0.271461	0.200836	0.16409	0.171116	0.333612	0.174577	0.26189	0.246022	0.110645	0.254025	0.20163	0.273558	0.187483	0.189129	0.263241	0.122301	0.0937429	0.0863466	0.143595	0.0923828	0.224144	0.223008	0.288635	0.444622	0.208911	0.208866	0.332584	0.248472	0.212288	0.235185	0.475104	0.213606
cg08867067	0.666906	0.785073	0.79568	0.677094	0.703024	0.630387	0.920611	0.77204	0.702601	0.71807	0.479393	0.67789	0.750123	0.764273	0.666325	0.546342	0.748967	0.591029	0.845923	0.786004	0.728162	0.446415	0.681617	0.692949	0.789821	0.778755	0.676174	0.716088	0.585376	0.662317	0.774202	0.687754	0.43872	0.826651	0.765916	0.790799	0.830875	0.75239	0.724994	0.616855	0.416125	0.686309	0.697067	0.45904	0.463436	0.725779	0.717878	0.550138	0.758416
cg24452112	0.644979	0.670675	0.663552	0.562475	0.658949	0.690898	0.658413	0.706961	0.634267	0.604466	0.603741	0.653858	0.557237	0.692454	0.48511	0.584406	0.693733	0.637128	0.737909	0.69934	0.679788	0.544366	0.755033	0.729309	0.541187	0.627601	0.702155	0.449029	0.535868	0.602419	0.602015	0.534754	0.776269	0.762587	0.770968	0.728664	0.636557	0.541111	0.644482	0.590566	0.503273	0.629592	0.662748	0.543972	0.57859	0.646322	0.690171	0.437397	0.701779
cg27284398	0.279933	0.252445	0.424079	0.284107	0.250401	0.274625	0.203964	0.182051	0.268081	0.257903	0.264908	0.300024	0.288626	0.291517	0.673714	0.456285	0.172419	0.390107	0.38164	0.178663	0.310054	0.274044	0.177733	0.339492	0.335375	0.196724	0.255424	0.372345	0.204717	0.191942	0.335392	0.481807	0.175155	0.374419	0.151143	0.362552	0.199077	0.202169	0.457373	0.28892	0.413719	0.240579	0.397945	0.405839	0.28344	0.197779	0.234554	0.404823	0.635279
cg09883602	0.649784	0.546819	0.428613	0.600852	0.699953	0.67608	0.282704	0.528936	0.707295	0.660109	0.620915	0.689145	0.678036	0.553985	0.676538	0.862516	0.745902	0.758589	0.420131	0.62017	0.503282	0.87511	0.668862	0.654836	0.604111	0.602211	0.666921	0.594519	0.714738	0.645067	0.537486	0.661708	0.631979	0.480104	0.5981	0.623217	0.477276	0.658488	0.768298	0.629748	0.87474	0.620439	0.600476	0.794796	0.4628	0.714621	0.653721	0.810221	0.70248
cg12692600	0.469188	0.390719	0.32026	0.476148	0.507338	0.498875	0.183519	0.384817	0.563495	0.511084	0.480874	0.48695	0.519464	0.424996	0.542829	0.656728	0.490492	0.560338	0.319318	0.356832	0.397908	0.655515	0.393808	0.498886	0.450939	0.406658	0.525704	0.411777	0.564516	0.49329	0.42525	0.527984	0.447924	0.372464	0.4661	0.468749	0.318448	0.444956	0.493276	0.508047	0.67381	0.474879	0.422511	0.619656	0.385204	0.491788	0.465983	0.647419	0.481435
cg22163391	0.368036	0.29804	0.294282	0.373105	0.387122	0.390982	0.209285	0.297032	0.434915	0.408516	0.342135	0.415997	0.450348	0.312601	0.398937	0.505539	0.379779	0.414785	0.255558	0.321976	0.274712	0.483447	0.304978	0.404576	0.341251	0.287062	0.331468	0.39698	0.391917	0.407879	0.423426	0.462909	0.296102	0.281831	0.283753	0.311584	0.227562	0.358005	0.395361	0.361281	0.58026	0.311738	0.294627	0.487002	0.361607	0.347708	0.37291	0.576267	0.326244
cg01216876	0.355709	0.302081	0.232537	0.373289	0.4118	0.435299	0.102465	0.280287	0.407706	0.402875	0.352346	0.406234	0.349545	0.336641	0.375669	0.633588	0.420875	0.449155	0.180921	0.272741	0.265635	0.545184	0.267165	0.413496	0.353224	0.238808	0.424104	0.333596	0.482668	0.398153	0.30289	0.487525	0.399974	0.266296	0.326364	0.390981	0.246865	0.349618	0.343491	0.417223	0.612755	0.359487	0.319385	0.514907	0.273148	0.35665	0.326653	0.56296	0.372564
cg20770573	0.551171	0.430841	0.452052	0.522196	0.591945	0.591544	0.228859	0.403854	0.607206	0.528635	0.399637	0.535859	0.551563	0.46968	0.590297	0.678835	0.578881	0.642376	0.415399	0.419698	0.343369	0.709974	0.49092	0.54412	0.501507	0.50481	0.514501	0.588174	0.630572	0.536856	0.48341	0.659924	0.442948	0.406786	0.442055	0.494959	0.377509	0.527026	0.536529	0.565095	0.862887	0.417105	0.468432	0.735467	0.450571	0.528624	0.530234	0.750218	0.617647
cg23818106	0.513	0.437555	0.380596	0.513523	0.537838	0.531503	0.212036	0.468528	0.57693	0.533358	0.46835	0.538673	0.566909	0.454693	0.522268	0.633925	0.547857	0.59659	0.348014	0.434171	0.428279	0.679344	0.492391	0.534257	0.472154	0.438982	0.547129	0.416426	0.583995	0.532789	0.426618	0.542667	0.535509	0.38961	0.463253	0.495665	0.383848	0.473389	0.517498	0.521232	0.692822	0.531769	0.475314	0.646236	0.445944	0.523659	0.518514	0.643867	0.474063
cg23324787	0.822645	0.876649	0.925658	0.850517	0.801379	0.786641	0.954684	0.912217	0.792908	0.84099	0.846812	0.793842	0.779144	0.848765	0.710193	0.753605	0.806656	0.73803	0.920244	0.900633	0.92938	0.674641	0.812316	0.829235	0.883749	0.874958	0.808864	0.841261	0.735396	0.772168	0.834689	0.804908	0.898755	0.888798	0.915182	0.853014	0.938077	0.806441	0.804285	0.687242	0.582906	0.854348	0.823138	0.685233	0.812786	0.812095	0.815599	0.6446	0.818501
cg16486198	0.182583	0.160046	0.141643	0.148602	0.207709	0.192672	0.0728974	0.0987427	0.221273	0.176049	0.151988	0.203545	0.270349	0.159661	0.211861	0.23387	0.17891	0.228534	0.137478	0.169552	0.0855744	0.245356	0.182384	0.185235	0.162753	0.221879	0.241088	0.259309	0.200193	0.229631	0.207724	0.268589	0.0984847	0.156082	0.0991631	0.122291	0.124018	0.225939	0.284711	0.201749	0.43881	0.125944	0.186149	0.292535	0.125125	0.188031	0.249124	0.385791	0.232538
cg22587211	0.481367	0.423656	0.305686	0.438508	0.568709	0.523769	0.192362	0.452256	0.59346	0.533678	0.462174	0.510434	0.500255	0.484472	0.407408	0.675997	0.50457	0.583938	0.291914	0.461999	0.415449	0.697491	0.447721	0.534412	0.457659	0.395288	0.49582	0.37892	0.557533	0.544412	0.396404	0.50971	0.536525	0.382863	0.478954	0.486222	0.37249	0.493591	0.566776	0.510884	0.737029	0.512037	0.512959	0.630376	0.427445	0.529518	0.499793	0.665544	0.538087
cg20689531	0.308172	0.235198	0.241189	0.303591	0.305323	0.339317	0.122589	0.201417	0.3652	0.323864	0.279359	0.305439	0.32922	0.241661	0.271631	0.256366	0.308611	0.356375	0.242525	0.269977	0.209356	0.384784	0.296565	0.299393	0.313312	0.227168	0.294875	0.43502	0.373731	0.327609	0.25858	0.559401	0.231988	0.23181	0.262262	0.261191	0.208823	0.295552	0.293351	0.349155	0.511724	0.269838	0.276826	0.408265	0.264462	0.262917	0.296026	0.566641	0.314248
cg17870768	0.636952	0.571798	0.643687	0.636752	0.580609	0.6961	0.493318	0.531016	0.657448	0.601183	0.600328	0.641021	0.663735	0.601428	0.676086	0.73886	0.663679	0.687017	0.626431	0.618755	0.485839	0.685259	0.604244	0.64439	0.579325	0.621596	0.602904	0.680556	0.662526	0.618739	0.588313	0.801611	0.541051	0.573473	0.624366	0.657996	0.534467	0.58714	0.55053	0.635231	0.811438	0.570506	0.551444	0.752135	0.624716	0.59455	0.651877	0.821053	0.649568
cg17184651	0.387296	0.398805	0.616453	0.342655	0.374002	0.418933	0.230234	0.304579	0.428034	0.416216	0.345147	0.453202	0.44538	0.346651	0.514555	0.533906	0.464713	0.518695	0.274784	0.352592	0.347683	0.504302	0.359776	0.345994	0.349218	0.482291	0.396006	0.467041	0.673431	0.473412	0.356548	0.512189	0.266299	0.312134	0.320955	0.3216	0.248897	0.379442	0.477771	0.453928	0.700357	0.316022	0.406777	0.577054	0.369423	0.38295	0.405165	0.61576	0.421135
cg25330422	0.557928	0.603761	0.635704	0.551526	0.530131	0.502389	0.713682	0.580859	0.507957	0.641109	0.616078	0.502466	0.552033	0.615996	0.558538	0.468553	0.510278	0.467302	0.670229	0.654294	0.705416	0.359387	0.409075	0.632866	0.585703	0.48078	0.568307	0.485488	0.348796	0.490528	0.575385	0.47203	0.655086	0.671274	0.57764	0.642455	0.638712	0.608364	0.499299	0.500274	0.325746	0.606091	0.509447	0.387416	0.62561	0.546757	0.544048	0.289508	0.531339
cg08686087	0.576614	0.464594	0.584051	0.575029	0.557969	0.570769	0.492719	0.513981	0.585596	0.576011	0.617514	0.516104	0.579558	0.503162	0.530763	0.492924	0.513678	0.599149	0.551081	0.651261	0.44552	0.549505	0.437135	0.510456	0.570343	0.685236	0.531405	0.733571	0.573311	0.497978	0.616874	0.807433	0.416677	0.509872	0.593629	0.473854	0.497331	0.541313	0.592608	0.571795	0.767617	0.448276	0.469911	0.637286	0.508591	0.516834	0.604731	0.783184	0.605076
cg01970818	0.378249	0.263537	0.20091	0.356708	0.339928	0.447317	0.0997779	0.231106	0.431691	0.357404	0.302468	0.403909	0.436854	0.31115	0.424461	0.402939	0.39565	0.471398	0.237508	0.289971	0.274935	0.461386	0.328768	0.403187	0.342921	0.265598	0.403147	0.364221	0.439699	0.371781	0.353956	0.418482	0.274473	0.244553	0.290577	0.339748	0.179058	0.33914	0.445595	0.432198	0.613763	0.323179	0.326655	0.534769	0.333777	0.329598	0.372613	0.562147	0.405922
cg05266989	0.40263	0.267023	0.257179	0.395689	0.372974	0.433331	0.17637	0.259245	0.423536	0.384667	0.322964	0.455583	0.454433	0.368016	0.412716	0.410276	0.378445	0.496916	0.315241	0.317819	0.28316	0.462109	0.412765	0.393855	0.380265	0.292349	0.457645	0.414834	0.423905	0.394983	0.383632	0.547297	0.305056	0.293546	0.35936	0.316262	0.219542	0.366844	0.420795	0.440928	0.692224	0.345564	0.372079	0.587021	0.385691	0.374818	0.456391	0.616389	0.448197
cg18800748	0.661061	0.733708	0.687904	0.644774	0.672	0.741572	0.710653	0.728968	0.702906	0.690214	0.75725	0.691238	0.702169	0.729652	0.72288	0.495442	0.68084	0.646819	0.788799	0.758208	0.724441	0.573094	0.670161	0.701727	0.712006	0.742301	0.715992	0.61533	0.624958	0.692142	0.762623	0.528487	0.736666	0.732919	0.719115	0.718838	0.731855	0.667015	0.696078	0.65996	0.472203	0.705085	0.646562	0.592374	0.721671	0.681958	0.687603	0.528595	0.744248
cg00106512	0.437221	0.340475	0.420478	0.43077	0.406142	0.49836	0.121663	0.351243	0.50502	0.455581	0.342749	0.480147	0.557973	0.424022	0.48281	0.5818	0.436904	0.587875	0.389809	0.368975	0.262194	0.58928	0.346425	0.414576	0.375393	0.422861	0.50886	0.311068	0.503865	0.434162	0.436625	0.500088	0.347967	0.29427	0.47467	0.401096	0.226418	0.385151	0.407843	0.510078	0.683159	0.367108	0.378151	0.625101	0.366192	0.502099	0.433335	0.702985	0.466508
cg01775952	0.467241	0.365447	0.29411	0.445419	0.496839	0.509322	0.149888	0.415733	0.512048	0.464621	0.424182	0.475821	0.478266	0.408214	0.483812	0.710273	0.466593	0.521816	0.302461	0.356539	0.435779	0.643378	0.448444	0.485884	0.380845	0.513302	0.499548	0.380333	0.534613	0.481979	0.396301	0.4851	0.476621	0.335248	0.438693	0.459156	0.304261	0.42659	0.427311	0.439383	0.698898	0.485614	0.415238	0.604884	0.361008	0.490983	0.465425	0.629345	0.471541
cg02225040	0.402515	0.252785	0.279825	0.329825	0.354112	0.398248	0.136883	0.276925	0.315199	0.379331	0.287215	0.400264	0.362701	0.313457	0.444854	0.54645	0.366917	0.483977	0.267937	0.284349	0.256671	0.467279	0.286698	0.387849	0.291951	0.345089	0.441423	0.393506	0.418554	0.353782	0.373426	0.490391	0.25028	0.285772	0.278118	0.302625	0.163531	0.355387	0.409824	0.382495	0.659136	0.290442	0.286599	0.49948	0.328472	0.371905	0.405137	0.583199	0.335195
cg07388580	0.455405	0.42852	0.394206	0.425269	0.537889	0.54473	0.303987	0.334044	0.504719	0.524859	0.447505	0.485047	0.572764	0.35391	0.536695	0.623805	0.459982	0.509023	0.374944	0.419738	0.289751	0.561244	0.35905	0.381006	0.47323	0.593275	0.391215	0.68109	0.576605	0.528682	0.540459	0.708751	0.204825	0.301319	0.406461	0.282508	0.331145	0.438679	0.443861	0.546792	0.78207	0.416359	0.358398	0.676536	0.421053	0.363233	0.435076	0.764406	0.620464
cg15073665	0.641885	0.648701	0.653419	0.612012	0.656588	0.638448	0.680124	0.566816	0.674962	0.639496	0.623199	0.651751	0.66218	0.632455	0.723471	0.607835	0.699856	0.648835	0.688656	0.645206	0.524441	0.562977	0.687511	0.601734	0.629889	0.798231	0.665848	0.807207	0.643702	0.628134	0.734345	0.833451	0.529824	0.667201	0.610983	0.593979	0.61343	0.74013	0.775491	0.676984	0.889204	0.505074	0.651563	0.804787	0.70101	0.597013	0.680654	0.870023	0.693869
cg27209861	0.528585	0.511111	0.461718	0.57362	0.582629	0.578771	0.297273	0.471146	0.623792	0.56883	0.536966	0.554477	0.559295	0.499112	0.542561	0.724146	0.590104	0.593227	0.395878	0.442249	0.479715	0.673876	0.48497	0.559011	0.550716	0.444601	0.543974	0.514871	0.65789	0.531737	0.556721	0.607108	0.52604	0.439078	0.521732	0.539847	0.425382	0.489593	0.493184	0.551257	0.710979	0.549824	0.530163	0.65972	0.408077	0.592121	0.509212	0.744854	0.54386
cg04677123	0.54332	0.59689	0.46527	0.566249	0.63599	0.619936	0.329031	0.486808	0.569449	0.571833	0.531794	0.533959	0.639404	0.510892	0.613082	0.713941	0.640752	0.704456	0.48771	0.501852	0.460286	0.743176	0.428774	0.661185	0.646098	0.450598	0.5612	0.606906	0.680997	0.656762	0.481575	0.709503	0.608383	0.520844	0.501141	0.55606	0.472838	0.582698	0.584135	0.614416	0.784547	0.555209	0.551764	0.673496	0.408391	0.581417	0.50424	0.735578	0.631343
cg00454592	0.532075	0.547825	0.379773	0.556394	0.656081	0.586492	0.210728	0.61148	0.606862	0.658349	0.551903	0.612281	0.588389	0.491808	0.567929	0.773878	0.595814	0.727791	0.354392	0.544469	0.538556	0.817656	0.561134	0.641993	0.560167	0.465262	0.552864	0.473255	0.625033	0.579354	0.52883	0.600233	0.670813	0.436936	0.556075	0.535042	0.402847	0.594844	0.711888	0.522555	0.853178	0.639833	0.593922	0.727247	0.39954	0.613462	0.555495	0.697758	0.649505
cg08449574	0.116796	0.105116	0.0879336	0.146232	0.155056	0.169897	0.0222614	0.0685934	0.17551	0.133163	0.0912048	0.121815	0.0967762	0.101058	0.119335	0.219749	0.224614	0.188082	0.0715033	0.0420092	0.100243	0.206883	0.138407	0.118266	0.113283	0.119846	0.130153	0.148228	0.164372	0.137237	0.0852689	0.23223	0.0744047	0.0892207	0.0656072	0.0636023	0.0465068	0.127666	0.143536	0.0596456	0.399925	0.140475	0.123641	0.251852	0.157637	0.10549	0.114075	0.332183	0.144058
cg00257775	0.29061	0.31756	0.276884	0.319586	0.35168	0.319046	0.112443	0.267886	0.367648	0.320004	0.332803	0.329801	0.285423	0.254489	0.254045	0.549917	0.313153	0.33721	0.150107	0.220488	0.307865	0.430357	0.225523	0.29763	0.256105	0.292495	0.225605	0.601759	0.35875	0.29605	0.222963	0.720435	0.436049	0.23278	0.267615	0.373781	0.1963	0.313567	0.295604	0.332851	0.654364	0.402683	0.308692	0.381247	0.213823	0.364561	0.229089	0.554176	0.447454
cg26776551	0.466155	0.398293	0.300604	0.452668	0.530472	0.458024	0.209463	0.432134	0.532531	0.516571	0.45725	0.467186	0.480461	0.441639	0.45345	0.579454	0.475785	0.525154	0.315749	0.394779	0.405477	0.639399	0.430118	0.50906	0.473837	0.425743	0.521843	0.422089	0.532338	0.509985	0.425798	0.510806	0.514841	0.394676	0.43993	0.476925	0.374731	0.492526	0.553331	0.482524	0.676848	0.486096	0.443718	0.601822	0.385146	0.519742	0.433638	0.614355	0.48607
cg03243118	0.556153	0.51164	0.434701	0.588228	0.573814	0.593743	0.31868	0.53953	0.624268	0.612387	0.505794	0.629936	0.576499	0.465547	0.590274	0.658262	0.498982	0.6884	0.464235	0.470965	0.437957	0.750848	0.50851	0.54042	0.553239	0.49114	0.54509	0.506802	0.601526	0.577734	0.490239	0.593421	0.54458	0.404442	0.469724	0.546146	0.470712	0.499431	0.530742	0.572055	0.774836	0.617223	0.435623	0.6793	0.465316	0.620357	0.538287	0.674887	0.550161
cg26292258	0.228404	0.198443	0.212635	0.228615	0.26714	0.256199	0.0702217	0.200539	0.227554	0.287233	0.223563	0.238814	0.266907	0.182683	0.262493	0.445512	0.234138	0.308952	0.182214	0.235694	0.161937	0.341189	0.194835	0.227217	0.245372	0.157566	0.230913	0.248337	0.303029	0.246558	0.190045	0.402253	0.216985	0.200659	0.126744	0.145733	0.189717	0.229958	0.233834	0.276898	0.41601	0.20973	0.201973	0.362904	0.122874	0.248771	0.262037	0.465641	0.202588
cg10113908	0.293982	0.220809	0.190531	0.259865	0.308001	0.30907	0.120569	0.232365	0.351718	0.288712	0.250083	0.307464	0.365409	0.261584	0.303677	0.265337	0.319337	0.350589	0.224877	0.268664	0.203351	0.343427	0.246932	0.299633	0.262783	0.306848	0.335335	0.32458	0.379691	0.305171	0.298398	0.341356	0.209604	0.240281	0.279395	0.282238	0.20308	0.305509	0.332237	0.333375	0.468017	0.241152	0.264478	0.390614	0.242062	0.299351	0.29658	0.465466	0.314617
cg22970261	0.467358	0.410989	0.31297	0.425825	0.532185	0.508287	0.193272	0.4022	0.536151	0.509773	0.443581	0.487553	0.492791	0.430689	0.422898	0.668648	0.487564	0.533559	0.294806	0.39908	0.4308	0.634513	0.386626	0.567965	0.469286	0.297004	0.521406	0.397662	0.562126	0.544018	0.450559	0.488299	0.523689	0.365904	0.44625	0.479099	0.35417	0.477936	0.560591	0.485234	0.6552	0.497367	0.444733	0.59049	0.357964	0.479064	0.412088	0.567006	0.507066
cg26624021	0.765602	0.77102	0.687746	0.736483	0.856063	0.824513	0.599718	0.603425	0.817202	0.904445	0.760727	0.861129	0.905222	0.6033	0.908239	0.875596	0.749123	0.875981	0.587257	0.657551	0.626621	0.9404	0.67689	0.653509	0.63712	0.933428	0.707083	0.844507	0.899747	0.762417	0.674156	0.933295	0.733166	0.507436	0.721548	0.619776	0.526539	0.810399	0.835501	0.883098	0.915326	0.661289	0.680434	0.882921	0.737692	0.874075	0.653431	0.946241	0.820951
cg05037640	0.895677	0.912343	0.894094	0.910785	0.873948	0.925808	0.929231	0.926597	0.795785	0.712592	0.919014	0.906496	0.852656	0.93898	0.889478	0.813265	0.917167	0.904359	0.909428	0.947739	0.976868	0.814863	0.946371	0.892825	0.959613	0.831152	0.966605	0.699664	0.837726	0.773401	0.797232	0.64579	0.96454	0.917066	0.940488	0.954539	0.961487	0.890764	0.85036	0.896626	0.672199	0.937908	0.917436	0.809478	0.824697	0.903266	0.782412	0.697699	0.92087
cg16246428	0.390315	0.336045	0.294263	0.424045	0.442251	0.311173	0.0882724	0.229951	0.476164	0.44784	0.424852	0.264029	0.434164	0.406738	0.371061	0.316857	0.496159	0.570618	0.150562	0.231715	0.431221	0.63871	0.252852	0.36521	0.461298	0.24136	0.490541	0.194379	0.334911	0.480933	0.371914	0.3051	0.493035	0.322899	0.419489	0.307693	0.167864	0.409558	0.412197	0.431121	0.614405	0.504427	0.423577	0.451528	0.35565	0.482639	0.447533	0.602783	0.0352494
cg21272034	0.593317	0.671816	0.704932	0.606153	0.644407	0.56565	0.790976	0.651083	0.572992	0.677896	0.647208	0.520516	0.564788	0.634935	0.557759	0.636796	0.5142	0.551698	0.702949	0.739237	0.717009	0.444372	0.661882	0.611479	0.659146	0.595545	0.599953	0.591944	0.493933	0.562111	0.649004	0.568116	0.646632	0.694345	0.648314	0.682106	0.718992	0.575313	0.576017	0.513048	0.371114	0.689874	0.601411	0.433956	0.664194	0.597455	0.609625	0.451985	0.644038
cg18306374	0.802443	0.756929	0.817623	0.774416	0.765757	0.720724	0.792447	0.819815	0.691325	0.739606	0.744827	0.715288	0.731426	0.7631	0.767274	0.616145	0.74431	0.691579	0.839646	0.832221	0.823068	0.719806	0.731621	0.852382	0.783554	0.65234	0.75689	0.758085	0.705966	0.780774	0.813813	0.632951	0.889332	0.828784	0.869952	0.81356	0.876761	0.813899	0.708072	0.725446	0.58753	0.692611	0.838242	0.603263	0.658758	0.765658	0.753793	0.628882	0.661979
cg05581500	0.472289	0.46478	0.442738	0.476997	0.519184	0.534993	0.364619	0.43884	0.53203	0.507213	0.367483	0.581775	0.465905	0.50632	0.486042	0.549813	0.507048	0.628122	0.453936	0.42336	0.418642	0.534887	0.450771	0.526874	0.528355	0.403614	0.521963	0.449022	0.576935	0.512632	0.430493	0.54981	0.505574	0.351867	0.426717	0.524354	0.431459	0.435566	0.468451	0.568915	0.702073	0.458899	0.475186	0.611489	0.483351	0.555857	0.505665	0.583918	0.516222
cg24995061	0.514275	0.452122	0.298648	0.460398	0.614988	0.519724	0.237092	0.466591	0.607108	0.57617	0.488323	0.54801	0.534414	0.48585	0.47035	0.686985	0.511819	0.660845	0.323129	0.443422	0.448369	0.710585	0.502949	0.562409	0.517299	0.47081	0.549832	0.4807	0.581125	0.560279	0.470587	0.561895	0.567153	0.391556	0.447827	0.483104	0.372684	0.535093	0.661662	0.534764	0.719679	0.537929	0.518084	0.633417	0.458747	0.548984	0.481248	0.675339	0.544126
cg23412654	0.599542	0.70702	0.732289	0.591049	0.632001	0.576515	0.839876	0.660994	0.61903	0.627328	0.672142	0.622222	0.635849	0.66535	0.625961	0.456027	0.668677	0.503663	0.786469	0.713142	0.679825	0.460911	0.588244	0.608955	0.664729	0.716023	0.579957	0.645816	0.595555	0.590785	0.725892	0.546775	0.661358	0.732393	0.668857	0.662035	0.754283	0.657014	0.590398	0.542253	0.381532	0.585178	0.546725	0.480768	0.710182	0.590416	0.618574	0.497026	0.582963
cg11414997	0.875407	0.888784	0.876523	0.871013	0.861226	0.886121	0.948516	0.946819	0.824824	0.863845	0.859916	0.814835	0.829741	0.868858	0.827808	0.869698	0.849658	0.793675	0.924547	0.905059	0.910692	0.795063	0.874392	0.916608	0.918188	0.695533	0.747482	0.763897	0.809855	0.866695	0.866534	0.778981	0.92816	0.912881	0.939764	0.951874	0.931842	0.907108	0.807028	0.824574	0.656498	0.937666	0.826795	0.741311	0.83416	0.867382	0.841527	0.648971	0.87063
cg09463948	0.785549	0.883469	0.850541	0.815057	0.847608	0.751486	0.921536	0.888843	0.808207	0.831846	0.864515	0.797402	0.827648	0.827296	0.803067	0.705977	0.846057	0.722493	0.861286	0.870933	0.881607	0.723267	0.834706	0.806605	0.837731	0.825817	0.784637	0.778942	0.810284	0.8002	0.844958	0.735834	0.899338	0.836184	0.841707	0.869222	0.887597	0.856942	0.763055	0.772082	0.600143	0.844231	0.771709	0.68264	0.834776	0.832771	0.777949	0.682976	0.800364
cg10382369	0.0424817	0.0425201	0.0389068	0.0585155	0.0633522	0.0701457	0.0207277	0.0227442	0.029912	0.0397579	0.0299163	0.0416653	0.0725756	0.0208393	0.0622557	0.162533	0.0595609	0.0238759	0.0324972	0.0216072	0.0258607	0.0896113	0.0198859	0.0299802	0.0382299	0.123467	0.0288441	0.181809	0.107279	0.0435535	0.0570733	0.24559	0.0266022	0.0299558	0.0277493	0.0190721	0.0203889	0.0482454	0.0628602	0.0558103	0.295892	0.0330339	0.0433142	0.127778	0.0270287	0.0263435	0.0341554	0.325315	0.0392976
cg17515347	0.599631	0.653848	0.590701	0.645078	0.708174	0.707648	0.58399	0.60547	0.683274	0.621849	0.585397	0.633324	0.677	0.687168	0.638613	0.625938	0.641098	0.755315	0.631272	0.701692	0.555619	0.656271	0.66006	0.663323	0.596002	0.661612	0.703705	0.599743	0.725316	0.618854	0.527051	0.768839	0.582867	0.466259	0.614926	0.656197	0.547504	0.709131	0.633238	0.690567	0.864698	0.512579	0.602628	0.807593	0.624234	0.69532	0.68455	0.806722	0.729248
cg19405329	0.50446	0.454699	0.373981	0.534039	0.539442	0.545689	0.196105	0.480195	0.577959	0.574563	0.466164	0.538647	0.558684	0.463421	0.567061	0.78043	0.514959	0.621413	0.30219	0.41994	0.432624	0.762285	0.481373	0.554102	0.500351	0.462999	0.551288	0.413329	0.578035	0.532098	0.39626	0.551598	0.561876	0.370382	0.495814	0.501053	0.336956	0.510014	0.492983	0.481451	0.727256	0.562889	0.460648	0.678265	0.383858	0.524709	0.476993	0.726069	0.522912
cg18758542	0.148844	0.141904	0.154285	0.144243	0.180348	0.238864	0.0363166	0.0725998	0.147441	0.183978	0.104986	0.12466	0.183497	0.151185	0.227641	0.132502	0.106264	0.285891	0.107651	0.108733	0.0313096	0.311974	0.0718338	0.117229	0.0682326	0.181103	0.133434	0.174834	0.257907	0.0862108	0.105533	0.305123	0.120866	0.0794927	0.0610526	0.115507	0.0335986	0.114573	0.176046	0.102949	0.572214	0.10164	0.11531	0.274381	0.10167	0.0913091	0.154764	0.362595	0.18268
cg16652005	0.605479	0.566473	0.514631	0.559558	0.667721	0.684272	0.4344	0.50152	0.634979	0.646607	0.615827	0.720491	0.734017	0.61595	0.66714	0.723678	0.599345	0.701374	0.568634	0.533686	0.470702	0.767581	0.523928	0.674399	0.587225	0.560863	0.66078	0.551324	0.661384	0.63241	0.503331	0.715175	0.543204	0.42901	0.577787	0.557479	0.456535	0.691444	0.663893	0.690118	0.863163	0.55114	0.590624	0.755259	0.631403	0.625106	0.698476	0.768712	0.629113
cg15148973	0.297753	0.309461	0.20241	0.296969	0.326052	0.376436	0.154791	0.246733	0.384257	0.301124	0.30269	0.348381	0.369869	0.302161	0.42057	0.39181	0.365585	0.462579	0.226247	0.212292	0.186777	0.446065	0.245436	0.297917	0.320766	0.260243	0.441351	0.356567	0.430009	0.273217	0.373549	0.454553	0.256555	0.177681	0.279446	0.241677	0.197419	0.343759	0.406449	0.332195	0.610516	0.261778	0.297275	0.470182	0.266703	0.304393	0.332136	0.554943	0.441138
cg24890964	0.51129	0.496505	0.497004	0.495174	0.527395	0.569815	0.436878	0.43665	0.536858	0.511151	0.538208	0.545522	0.604764	0.486163	0.567325	0.543018	0.552539	0.54234	0.528503	0.487446	0.431975	0.479412	0.498928	0.521476	0.573457	0.60182	0.4992	0.715692	0.619045	0.570052	0.569147	0.755642	0.435664	0.496855	0.504333	0.506209	0.466931	0.55474	0.60918	0.557525	0.740683	0.463807	0.532271	0.643419	0.545381	0.485148	0.533025	0.757674	0.528759
cg24394152	0.544818	0.481177	0.42203	0.530817	0.582635	0.601975	0.254876	0.473435	0.630487	0.577112	0.53226	0.550669	0.551964	0.503937	0.554162	0.721729	0.603211	0.63749	0.403878	0.496225	0.433237	0.759976	0.52974	0.55464	0.516146	0.554135	0.549334	0.499313	0.666147	0.615826	0.496919	0.648686	0.546555	0.459763	0.512163	0.528968	0.394712	0.534822	0.533729	0.560708	0.771715	0.531046	0.510292	0.708557	0.427481	0.569118	0.53456	0.750888	0.548909
cg03191260	0.467154	0.447979	0.350355	0.438674	0.543753	0.499534	0.248038	0.42196	0.555541	0.518333	0.444188	0.496077	0.470379	0.460816	0.447272	0.589735	0.501057	0.537173	0.335216	0.405561	0.409906	0.629374	0.479561	0.525547	0.492659	0.301867	0.49482	0.38345	0.519496	0.497165	0.412096	0.491762	0.52819	0.335349	0.425031	0.50168	0.361228	0.496433	0.569785	0.482489	0.673101	0.474019	0.468415	0.612441	0.36835	0.497682	0.472982	0.599551	0.487207
cg03098854	0.451201	0.390004	0.361654	0.461818	0.470767	0.480767	0.262792	0.38775	0.503739	0.487241	0.44046	0.48088	0.478865	0.417469	0.451013	0.651698	0.450599	0.494107	0.423527	0.373863	0.365836	0.594679	0.392936	0.462884	0.468725	0.39059	0.453734	0.431109	0.482721	0.456489	0.435223	0.518024	0.470639	0.360608	0.418939	0.447376	0.380515	0.404595	0.449901	0.437513	0.598794	0.454718	0.374656	0.571544	0.393439	0.458981	0.474813	0.602987	0.485758
cg25832746	0.696755	0.660244	0.581363	0.735628	0.746114	0.726218	0.468307	0.657955	0.757782	0.793041	0.627154	0.738934	0.660816	0.662241	0.650821	0.748821	0.643011	0.732998	0.566901	0.650549	0.659406	0.849391	0.546839	0.754303	0.728616	0.47639	0.630176	0.735577	0.739575	0.704135	0.606997	0.811359	0.641948	0.628632	0.648029	0.719362	0.618548	0.659311	0.697697	0.753297	0.847459	0.650208	0.713359	0.742832	0.54846	0.761482	0.736263	0.859399	0.672594
cg17009510	0.658542	0.663637	0.529708	0.755909	0.705175	0.67264	0.403125	0.638851	0.769302	0.747995	0.621395	0.70381	0.65632	0.632745	0.71579	0.934956	0.64346	0.709697	0.486535	0.580572	0.596527	0.816993	0.719795	0.66804	0.675561	0.630077	0.644335	0.662562	0.659607	0.666588	0.581625	0.845865	0.78148	0.581455	0.569374	0.710956	0.684197	0.637415	0.761556	0.644026	0.845009	0.746292	0.659262	0.791566	0.536354	0.767173	0.683448	0.838958	0.644205
cg22869755	0.318955	0.172783	0.182532	0.271127	0.316991	0.340632	0.0619244	0.17646	0.343383	0.307178	0.244862	0.332621	0.371876	0.247695	0.344806	0.462359	0.299638	0.387701	0.171852	0.171602	0.183881	0.410669	0.270534	0.326119	0.307639	0.182237	0.282918	0.256459	0.433032	0.325827	0.235273	0.393395	0.177637	0.165638	0.212653	0.223185	0.137296	0.266159	0.307947	0.381182	0.595897	0.237289	0.216002	0.466788	0.240756	0.263513	0.222545	0.559995	0.289188
cg24531993	0.690051	0.808754	0.833694	0.712014	0.703801	0.727577	0.846822	0.729996	0.696411	0.760427	0.772158	0.655878	0.752052	0.73932	0.743516	0.681449	0.652834	0.677351	0.842122	0.76704	0.769985	0.500234	0.672705	0.743615	0.799188	0.716557	0.682525	0.665837	0.632345	0.698237	0.834962	0.629713	0.78204	0.805496	0.794414	0.801878	0.835634	0.7635	0.646611	0.668557	0.518654	0.767717	0.697885	0.573467	0.782904	0.724359	0.73706	0.542292	0.70485
cg13011311	0.72307	0.698377	0.778709	0.683598	0.689723	0.694293	0.783208	0.699459	0.684619	0.713818	0.717805	0.664215	0.715474	0.736475	0.637705	0.584993	0.556083	0.57118	0.746338	0.786809	0.826664	0.549539	0.630553	0.672819	0.739619	0.687288	0.577507	0.555632	0.618746	0.647006	0.690094	0.621425	0.81064	0.769301	0.79781	0.721005	0.783882	0.707082	0.671596	0.654676	0.50415	0.626395	0.669111	0.528447	0.684957	0.683695	0.684027	0.55943	0.588138
cg15047616	0.415708	0.316154	0.255355	0.390245	0.505786	0.421669	0.153246	0.285343	0.467843	0.477837	0.363626	0.433731	0.455401	0.330882	0.399749	0.560244	0.40807	0.481981	0.311276	0.341749	0.27577	0.511937	0.442768	0.416712	0.420578	0.367391	0.424909	0.443007	0.509626	0.432419	0.383292	0.50837	0.349192	0.310568	0.355388	0.379107	0.293812	0.390656	0.447935	0.431924	0.640651	0.384111	0.361101	0.543824	0.337757	0.395652	0.393324	0.624823	0.393546
cg24359363	0.503237	0.518413	0.448384	0.525131	0.567153	0.591414	0.315273	0.406229	0.577765	0.614785	0.511263	0.55373	0.643607	0.408864	0.605537	0.706389	0.589647	0.501127	0.480927	0.441607	0.372508	0.646381	0.54742	0.472248	0.540587	0.606848	0.392245	0.712011	0.611395	0.5321	0.595316	0.785537	0.40064	0.48922	0.48591	0.448597	0.419289	0.57232	0.610876	0.596297	0.834123	0.416878	0.445402	0.699213	0.45104	0.446978	0.540534	0.833384	0.506321
cg17759224	0.298622	0.267358	0.228355	0.313051	0.356466	0.308647	0.119684	0.300113	0.351416	0.319324	0.278861	0.273266	0.275508	0.28385	0.316857	0.370409	0.274475	0.417918	0.22392	0.250489	0.226385	0.365305	0.20007	0.368659	0.299905	0.146404	0.319408	0.36173	0.372581	0.309689	0.220956	0.45239	0.250881	0.25661	0.315742	0.244835	0.168742	0.238968	0.311125	0.333594	0.531476	0.283412	0.288315	0.428676	0.258863	0.291077	0.321966	0.489197	0.300699
cg18297161	0.641983	0.736008	0.762058	0.650484	0.653397	0.691905	0.75993	0.700681	0.706036	0.696568	0.729454	0.678084	0.712052	0.670024	0.720844	0.543874	0.722835	0.5978	0.795795	0.76684	0.75302	0.529503	0.682026	0.683493	0.730568	0.70532	0.597268	0.693461	0.598023	0.666014	0.743315	0.617425	0.676084	0.752006	0.759743	0.711491	0.768316	0.716897	0.591094	0.639716	0.466912	0.713523	0.601926	0.552327	0.722485	0.63413	0.676588	0.575845	0.692754
cg26742470	0.738967	0.785192	0.838513	0.684697	0.718531	0.730805	0.91325	0.847114	0.697176	0.691653	0.767051	0.6886	0.713754	0.780775	0.737028	0.500897	0.768052	0.634775	0.88865	0.844555	0.721061	0.447281	0.676506	0.692082	0.833317	0.802235	0.652642	0.757729	0.629148	0.683366	0.780713	0.655771	0.756004	0.857595	0.808733	0.77499	0.855008	0.754033	0.750072	0.617195	0.505638	0.711261	0.711155	0.570366	0.801146	0.648744	0.680372	0.620589	0.741751
cg04962892	0.445461	0.287102	0.236261	0.425387	0.431021	0.461196	0.108606	0.329792	0.486619	0.404332	0.324331	0.457986	0.483374	0.356363	0.538404	0.589216	0.506221	0.537636	0.26539	0.322224	0.304949	0.599188	0.417699	0.461397	0.366922	0.405381	0.468078	0.366584	0.521468	0.420762	0.347448	0.52431	0.375773	0.279126	0.339458	0.374963	0.222153	0.408224	0.483976	0.486796	0.730145	0.318199	0.354773	0.644199	0.359131	0.379247	0.481981	0.663724	0.465687
cg25884427	0.577902	0.728652	0.683136	0.649984	0.613138	0.645162	0.687435	0.685118	0.619158	0.691458	0.662277	0.621011	0.690475	0.659557	0.582959	0.640477	0.694067	0.603671	0.707573	0.698132	0.703314	0.564582	0.654257	0.633483	0.624961	0.736907	0.546944	0.581029	0.609793	0.66714	0.711626	0.480241	0.783541	0.649597	0.700489	0.736461	0.758775	0.659011	0.476342	0.610063	0.377134	0.679775	0.589745	0.494965	0.730726	0.649719	0.607313	0.479726	0.580145
cg01663665	0.437725	0.440003	0.307177	0.518185	0.4726	0.502582	0.216826	0.427327	0.542947	0.516582	0.49397	0.546378	0.515213	0.450632	0.451049	0.648849	0.541492	0.55712	0.317004	0.379265	0.382432	0.606479	0.459313	0.520538	0.496019	0.338728	0.556513	0.401183	0.608773	0.504952	0.484265	0.555991	0.494646	0.366181	0.411268	0.444094	0.384438	0.423535	0.560343	0.512773	0.665514	0.439841	0.454186	0.587329	0.420583	0.482146	0.43985	0.627939	0.548912
cg04987734	0.312912	0.338283	0.273915	0.281177	0.254892	0.283856	0.345333	0.369899	0.265556	0.335753	0.354529	0.228489	0.224611	0.383877	0.217595	0.314783	0.240906	0.28547	0.360695	0.289476	0.396117	0.217227	0.230853	0.313712	0.417602	0.153895	0.271652	0.122169	0.266878	0.308168	0.333483	0.161961	0.449621	0.391055	0.379421	0.404235	0.440389	0.2763	0.26563	0.254961	0.109583	0.320693	0.243771	0.153759	0.318603	0.309215	0.251258	0.0923183	0.24349
cg13207753	0.492135	0.440876	0.323194	0.504083	0.516634	0.534249	0.176338	0.451234	0.599443	0.522361	0.478578	0.513465	0.540225	0.435363	0.432313	0.708416	0.535736	0.550352	0.337615	0.361593	0.407123	0.675255	0.449584	0.568885	0.482588	0.324091	0.507398	0.422022	0.601903	0.535872	0.407494	0.49863	0.483619	0.395866	0.464974	0.493909	0.360344	0.469372	0.505362	0.513438	0.695939	0.513773	0.428428	0.628372	0.404644	0.481441	0.494017	0.638675	0.511933
cg20615753	0.422121	0.310833	0.303856	0.399822	0.417733	0.422271	0.151649	0.307715	0.393531	0.448215	0.369926	0.452734	0.460393	0.341649	0.453286	0.554965	0.477178	0.485011	0.322403	0.320973	0.290007	0.533902	0.388804	0.411219	0.402998	0.423845	0.409153	0.485377	0.499472	0.398697	0.333145	0.578158	0.384566	0.296523	0.395199	0.37507	0.29223	0.424582	0.435031	0.446231	0.64168	0.411716	0.361072	0.56189	0.271867	0.385298	0.357261	0.663826	0.441745
cg24376039	0.620027	0.578233	0.467265	0.611104	0.671519	0.672269	0.35437	0.564789	0.693335	0.691138	0.60804	0.681921	0.668225	0.560628	0.633095	0.840816	0.643472	0.699463	0.431173	0.551824	0.554172	0.821726	0.597739	0.628177	0.605574	0.644539	0.653897	0.598315	0.673628	0.646953	0.58203	0.734953	0.661694	0.515064	0.584789	0.613185	0.498102	0.641989	0.681362	0.639173	0.818964	0.631489	0.588079	0.759414	0.537341	0.681087	0.615789	0.813	0.650191
cg05795603	0.37438	0.230386	0.171857	0.31264	0.390637	0.359853	0.0993762	0.253009	0.455318	0.355934	0.319496	0.394144	0.402931	0.29283	0.353685	0.523051	0.381559	0.404217	0.259024	0.281163	0.201409	0.4885	0.371311	0.386765	0.344456	0.263126	0.414405	0.358922	0.466002	0.325713	0.324286	0.417006	0.237127	0.23274	0.265462	0.353772	0.211523	0.386622	0.494094	0.408971	0.65782	0.254957	0.279575	0.530759	0.287089	0.286859	0.310896	0.608915	0.395141
cg07661835	0.723559	0.604677	0.654346	0.661867	0.641776	0.632696	0.820631	0.724331	0.711328	0.71347	0.700195	0.61605	0.639424	0.680212	0.661254	0.353505	0.580658	0.547592	0.745218	0.79637	0.672687	0.461024	0.6744	0.708947	0.666257	0.713538	0.63171	0.593322	0.654978	0.539858	0.690867	0.555578	0.708484	0.770135	0.669194	0.705241	0.738958	0.758595	0.659619	0.666825	0.441317	0.700828	0.61863	0.457233	0.753639	0.676713	0.6416	0.441517	0.664281
cg23889010	0.473953	0.493226	0.366573	0.475669	0.630422	0.490236	0.178391	0.463646	0.628071	0.623847	0.534539	0.558959	0.523925	0.474462	0.534187	0.811467	0.628053	0.622022	0.307943	0.432344	0.432375	0.747026	0.493611	0.55454	0.48692	0.513586	0.568893	0.462492	0.604016	0.545275	0.439506	0.648564	0.553377	0.389279	0.451767	0.537168	0.361339	0.542899	0.666487	0.562082	0.768804	0.512401	0.463465	0.712364	0.434897	0.616679	0.530496	0.714245	0.568081
cg00498146	0.282504	0.316423	0.269315	0.337488	0.330622	0.411481	0.154037	0.241489	0.409042	0.378098	0.26099	0.306488	0.364918	0.250315	0.381949	0.504068	0.31716	0.337318	0.239814	0.237781	0.246645	0.474548	0.258023	0.325126	0.345226	0.263884	0.247643	0.46692	0.439379	0.275354	0.31386	0.733924	0.252673	0.212754	0.214217	0.284676	0.292744	0.350819	0.367143	0.353296	0.771815	0.271374	0.288858	0.503324	0.255382	0.321598	0.252617	0.664899	0.339393
cg20504084	0.382275	0.29245	0.224242	0.37395	0.441005	0.424099	0.0816251	0.303145	0.428034	0.487264	0.353519	0.40235	0.42701	0.322855	0.438296	0.542681	0.393358	0.46003	0.251777	0.249813	0.260225	0.564073	0.357647	0.393205	0.340042	0.371258	0.367848	0.439578	0.475767	0.428593	0.363368	0.519603	0.334359	0.245795	0.259064	0.340608	0.232118	0.357532	0.368651	0.417358	0.700471	0.345378	0.336246	0.542489	0.285317	0.389408	0.324349	0.579623	0.364573
cg24313293	0.434351	0.39614	0.319788	0.451232	0.49283	0.466438	0.104933	0.332554	0.526971	0.438256	0.379183	0.284026	0.541073	0.371803	0.458283	0.511452	0.501671	0.609256	0.249377	0.334983	0.403192	0.65533	0.350839	0.519314	0.309799	0.29793	0.45366	0.312929	0.55078	0.463707	0.344151	0.534878	0.322178	0.318664	0.406496	0.42455	0.241525	0.438401	0.438779	0.501045	0.703673	0.4045	0.460201	0.597424	0.414703	0.402975	0.492559	0.669425	0.414647
cg17019377	0.45592	0.390301	0.336284	0.41951	0.486555	0.463396	0.224352	0.41029	0.485268	0.481992	0.455635	0.474697	0.506407	0.410023	0.449909	0.621464	0.435467	0.513739	0.325778	0.374937	0.392919	0.568165	0.412563	0.482602	0.459296	0.386208	0.447235	0.382226	0.48906	0.475753	0.421446	0.475748	0.525092	0.342391	0.394882	0.468944	0.383117	0.450885	0.503007	0.456058	0.647886	0.480089	0.418859	0.57304	0.41541	0.457165	0.41086	0.585383	0.490251
cg10951380	0.484672	0.462528	0.381859	0.472786	0.545011	0.525274	0.299527	0.357972	0.506896	0.478319	0.395279	0.447747	0.482999	0.436187	0.588544	0.572736	0.605197	0.628701	0.339917	0.435046	0.453176	0.620715	0.55205	0.486532	0.432328	0.466362	0.635803	0.522381	0.469568	0.514297	0.465822	0.468559	0.448241	0.332685	0.482843	0.45071	0.372315	0.545002	0.58167	0.485179	0.644653	0.455634	0.530678	0.550325	0.412575	0.610701	0.656933	0.578655	0.379954
cg04222196	0.655461	0.754153	0.780449	0.659071	0.671009	0.590239	0.849539	0.734659	0.621105	0.65249	0.708319	0.619406	0.667335	0.722087	0.638815	0.47205	0.715316	0.546442	0.849991	0.740417	0.724603	0.455753	0.659587	0.631849	0.758735	0.782687	0.702887	0.735128	0.646425	0.640582	0.807337	0.592946	0.688313	0.751433	0.712363	0.675585	0.791484	0.690169	0.704748	0.573288	0.436061	0.640663	0.608809	0.579436	0.736242	0.636341	0.668532	0.510188	0.660532
cg18953183	0.588602	0.673842	0.725335	0.620717	0.575882	0.566611	0.819386	0.577451	0.59058	0.595251	0.68007	0.621574	0.693179	0.628989	0.639786	0.4035	0.681355	0.468536	0.764296	0.668886	0.601996	0.339442	0.532809	0.612542	0.594617	0.735517	0.570758	0.612479	0.57797	0.613039	0.752314	0.547878	0.563197	0.724613	0.683513	0.656465	0.783205	0.663583	0.521443	0.58234	0.368106	0.507693	0.535562	0.462573	0.70814	0.610686	0.589122	0.469251	0.624618
cg09050300	0.459041	0.389851	0.435731	0.448848	0.456772	0.469916	0.241773	0.398429	0.534357	0.53897	0.499462	0.535267	0.590039	0.317769	0.57135	0.755103	0.374063	0.448336	0.339371	0.344319	0.327205	0.602807	0.309424	0.388119	0.460898	0.703044	0.338973	0.612935	0.578379	0.583017	0.506606	0.685713	0.393914	0.337559	0.317939	0.38663	0.333118	0.421373	0.409221	0.530783	0.68271	0.355155	0.317767	0.625375	0.388398	0.392093	0.342243	0.731024	0.328293
cg20699522	0.789221	0.845799	0.860747	0.762599	0.813147	0.73483	0.918387	0.80036	0.796087	0.836428	0.816642	0.765974	0.839166	0.816252	0.746584	0.68076	0.726955	0.699877	0.90981	0.877102	0.843641	0.649182	0.767878	0.812944	0.833798	0.797192	0.7828	0.809517	0.728918	0.804435	0.822259	0.658117	0.843358	0.859515	0.815868	0.829464	0.8633	0.832125	0.814772	0.804062	0.540218	0.796773	0.805769	0.654552	0.879281	0.795708	0.738517	0.658503	0.746486
cg20867648	0.275596	0.106903	0.141033	0.31413	0.17044	0.193442	0.177622	0.0951447	0.141363	0.144911	0.142046	0.183079	0.189919	0.220036	0.202131	0.132582	0.0742076	0.34246	0.296611	0.154393	0.226	0.18873	0.14053	0.176181	0.159754	0.307311	0.312874	0.180853	0.165434	0.163362	0.299918	0.22797	0.0985938	0.142025	0.266157	0.277556	0.0746411	0.1717	0.202665	0.303937	0.643761	0.130422	0.150274	0.308167	0.12713	0.277412	0.318382	0.33348	0.21163
cg12639019	0.691565	0.768139	0.823928	0.666831	0.72492	0.634842	0.905839	0.747243	0.665332	0.692604	0.728969	0.60866	0.710716	0.72494	0.740611	0.349018	0.831907	0.582845	0.867504	0.788554	0.7349	0.462642	0.701007	0.666963	0.772531	0.80642	0.640553	0.75865	0.583044	0.672562	0.722036	0.701467	0.669789	0.802044	0.795662	0.712677	0.821705	0.681302	0.72314	0.632789	0.411384	0.625108	0.649411	0.512185	0.768265	0.619414	0.709592	0.49912	0.688531
cg07957995	0.493989	0.463911	0.388471	0.46244	0.546278	0.622539	0.22802	0.403374	0.523581	0.57556	0.498514	0.532039	0.597486	0.495828	0.507613	0.636315	0.535413	0.581588	0.386963	0.415647	0.468703	0.662311	0.520841	0.547948	0.491964	0.384688	0.556334	0.416524	0.574631	0.620959	0.483153	0.591289	0.574348	0.388234	0.446198	0.519414	0.381675	0.533571	0.525382	0.558328	0.71178	0.531158	0.453721	0.645403	0.445045	0.538795	0.468163	0.624815	0.537067
cg24439037	0.449602	0.525617	0.393137	0.570971	0.521784	0.543711	0.369425	0.193696	0.55217	0.498449	0.44456	0.614168	0.591219	0.471527	0.482337	0.474716	0.41656	0.568782	0.433701	0.5107	0.490911	0.577928	0.384425	0.516293	0.505533	0.405502	0.554405	0.584568	0.579761	0.447169	0.447748	0.558115	0.401745	0.533955	0.510407	0.483672	0.39343	0.562351	0.43837	0.569826	0.709938	0.44185	0.528891	0.606498	0.493114	0.472064	0.483698	0.701568	0.524801
cg23120101	0.397251	0.384685	0.422978	0.452766	0.322662	0.484347	0.243168	0.352111	0.459705	0.419903	0.402966	0.429977	0.416171	0.344746	0.500483	0.562439	0.375063	0.531286	0.244889	0.327128	0.372248	0.495607	0.348842	0.381296	0.421145	0.396888	0.372047	0.478828	0.457219	0.46161	0.390004	0.52622	0.35805	0.327288	0.421667	0.402337	0.316505	0.373485	0.460129	0.452838	0.638224	0.338717	0.29355	0.566999	0.366015	0.428199	0.450516	0.628322	0.391791
cg15848611	0.128398	0.125159	0.155893	0.147574	0.150543	0.157878	0.0281254	0.0874097	0.166286	0.147387	0.102827	0.0967901	0.106246	0.101061	0.120254	0.255028	0.0938337	0.132795	0.0485474	0.079245	0.117643	0.169921	0.0940388	0.0963665	0.154608	0.118469	0.100535	0.400192	0.157378	0.152372	0.113711	0.584481	0.131416	0.0893769	0.105491	0.106349	0.0754352	0.129117	0.127081	0.137689	0.438967	0.132081	0.0998228	0.230549	0.083558	0.117539	0.101009	0.551937	0.104434
cg04036920	0.69832	0.618759	0.55052	0.611804	0.778309	0.67438	0.329087	0.581829	0.719973	0.780233	0.64253	0.700779	0.674184	0.61277	0.669524	0.97322	0.648597	0.73228	0.499155	0.58348	0.55313	0.940059	0.645625	0.656682	0.699985	0.652217	0.637735	0.751313	0.827185	0.664663	0.764744	0.901725	0.742421	0.549483	0.5754	0.625435	0.523983	0.727016	0.825361	0.688324	0.926292	0.672609	0.680833	0.875144	0.573491	0.784817	0.576313	0.909312	0.659412
cg14441276	0.618479	0.670442	0.743108	0.57801	0.587955	0.594154	0.835284	0.608563	0.537806	0.584277	0.619914	0.565538	0.610941	0.640617	0.687335	0.370528	0.667728	0.505129	0.76574	0.664466	0.604472	0.299863	0.640906	0.597294	0.675237	0.687648	0.553644	0.593917	0.513374	0.592621	0.711663	0.531842	0.592475	0.720073	0.635271	0.635323	0.735806	0.610085	0.579245	0.501557	0.313258	0.560742	0.574572	0.413577	0.654916	0.552058	0.576283	0.404159	0.622819
cg03498995	0.333739	0.24744	0.194829	0.339427	0.369147	0.373217	0.0783206	0.267584	0.37063	0.317801	0.255569	0.350462	0.388772	0.299219	0.371539	0.368251	0.425049	0.425824	0.200958	0.261239	0.263751	0.476087	0.256882	0.376866	0.305259	0.208892	0.398883	0.257324	0.378482	0.370964	0.265209	0.341075	0.245549	0.248794	0.247313	0.286081	0.190797	0.251254	0.364106	0.409652	0.509611	0.326328	0.327069	0.461433	0.273682	0.335781	0.351243	0.401339	0.362782
cg02144770	0.443065	0.37683	0.310075	0.447964	0.488756	0.505423	0.151586	0.418842	0.486591	0.489329	0.414923	0.502338	0.48198	0.405896	0.480968	0.67716	0.456109	0.520561	0.283055	0.369839	0.39683	0.663332	0.413454	0.523301	0.473934	0.33291	0.484815	0.381262	0.52098	0.471552	0.40392	0.458614	0.494923	0.352069	0.392311	0.442295	0.31838	0.407064	0.426943	0.479178	0.660039	0.466234	0.388449	0.57349	0.354657	0.449418	0.433018	0.605835	0.460117
cg20040976	0.508172	0.472177	0.429399	0.539756	0.533218	0.58217	0.358436	0.517398	0.573109	0.554754	0.526515	0.485875	0.535104	0.490031	0.532804	0.793457	0.47745	0.611191	0.34258	0.437871	0.47693	0.676432	0.415966	0.551712	0.469553	0.568949	0.481057	0.652734	0.540464	0.562562	0.462363	0.723735	0.54491	0.406872	0.494837	0.513465	0.368482	0.47084	0.485908	0.494297	0.737183	0.505562	0.506514	0.637959	0.452915	0.547864	0.480472	0.735066	0.530773
cg04789346	0.592519	0.630529	0.635366	0.663063	0.604329	0.672335	0.634305	0.563055	0.629541	0.615375	0.60215	0.599383	0.649083	0.613895	0.638597	0.569785	0.569709	0.59691	0.528737	0.666936	0.593811	0.59036	0.411572	0.608623	0.498417	0.697	0.567244	0.73554	0.563821	0.621724	0.546105	0.804439	0.635873	0.667717	0.601863	0.575755	0.627813	0.602106	0.599021	0.475501	0.683574	0.680726	0.64656	0.715735	0.695924	0.636657	0.649712	0.742153	0.737644
cg04013758	0.821821	0.852763	0.860527	0.784788	0.832249	0.784831	0.917018	0.851034	0.821672	0.825799	0.838684	0.79951	0.791866	0.854669	0.824526	0.73508	0.84279	0.745524	0.848256	0.872626	0.858194	0.757958	0.820869	0.826267	0.815801	0.894647	0.833881	0.768158	0.729745	0.792919	0.85045	0.708735	0.876112	0.870456	0.877671	0.853085	0.915821	0.877603	0.792352	0.745579	0.61157	0.849451	0.801497	0.692378	0.849378	0.829699	0.815359	0.652551	0.783474
cg16447142	0.418064	0.409307	0.359369	0.463402	0.458182	0.483431	0.177921	0.391682	0.47209	0.449803	0.400265	0.49294	0.468916	0.43507	0.45212	0.609328	0.408467	0.540406	0.329519	0.362033	0.385734	0.580688	0.359644	0.48256	0.420597	0.29762	0.47462	0.489919	0.477592	0.441615	0.397568	0.574459	0.478849	0.374423	0.35798	0.396422	0.329611	0.361153	0.431935	0.456968	0.669195	0.42738	0.361199	0.563338	0.30072	0.423507	0.401294	0.660891	0.426095
cg02956542	0.417888	0.273915	0.202741	0.373124	0.421488	0.433255	0.119941	0.299828	0.45607	0.391927	0.393341	0.377799	0.39833	0.355557	0.483703	0.511189	0.437762	0.495619	0.26468	0.334429	0.27209	0.555772	0.400187	0.407151	0.40103	0.314889	0.452282	0.389054	0.48012	0.4444	0.363285	0.456567	0.329343	0.278174	0.367762	0.345837	0.282842	0.420344	0.509184	0.440992	0.694607	0.366179	0.37159	0.546772	0.321403	0.375759	0.387008	0.573706	0.46741
cg02659916	0.42718	0.379177	0.295512	0.413877	0.437749	0.481076	0.170818	0.352854	0.501011	0.432779	0.442952	0.51027	0.494758	0.420636	0.415306	0.584064	0.557645	0.513465	0.317432	0.35524	0.403104	0.562608	0.419915	0.500177	0.405618	0.41559	0.492601	0.395354	0.541616	0.496987	0.43441	0.460377	0.439675	0.330158	0.402285	0.387712	0.324149	0.444281	0.475005	0.502922	0.59501	0.461563	0.381359	0.579126	0.341355	0.454099	0.474331	0.610745	0.435297
cg12654941	0.5624	0.552006	0.572362	0.543733	0.587081	0.651574	0.41695	0.464359	0.684028	0.689892	0.644165	0.646526	0.721256	0.50558	0.674787	0.600735	0.598716	0.646219	0.613967	0.546791	0.369036	0.644247	0.481143	0.533371	0.5782	0.761397	0.515356	0.810452	0.693279	0.632493	0.639357	0.839119	0.403734	0.507079	0.509283	0.499746	0.512332	0.667139	0.623511	0.671329	0.862862	0.498826	0.519507	0.759313	0.579344	0.549765	0.543653	0.872734	0.676713
cg12499872	0.77472	0.768229	0.774815	0.761583	0.786778	0.771083	0.845233	0.836863	0.684586	0.611398	0.769819	0.658794	0.578964	0.840611	0.578238	0.613199	0.848086	0.761682	0.848989	0.793516	0.91129	0.491332	0.839827	0.851337	0.774451	0.710684	0.821219	0.260137	0.503072	0.677025	0.643675	0.311456	0.91647	0.885998	0.823648	0.886562	0.8514	0.708806	0.720292	0.621684	0.307012	0.873689	0.792102	0.519157	0.774962	0.820997	0.834198	0.27695	0.75393
cg20000602	0.593519	0.62714	0.48867	0.62234	0.690507	0.663377	0.460905	0.512527	0.64281	0.709467	0.556384	0.783032	0.664235	0.535474	0.612619	0.797354	0.709164	0.706181	0.54086	0.519837	0.477207	0.821688	0.639607	0.618287	0.638067	0.613376	0.591022	0.678171	0.790009	0.662483	0.691756	0.77644	0.57672	0.454681	0.478636	0.553151	0.517247	0.610005	0.760908	0.689673	0.87706	0.523651	0.581453	0.757509	0.532568	0.63071	0.577368	0.826137	0.672122
cg13584531	0.614617	0.720938	0.793399	0.672934	0.542694	0.667813	0.807035	0.681574	0.637353	0.61581	0.691946	0.639719	0.697854	0.653827	0.69318	0.479713	0.672818	0.565565	0.78951	0.656135	0.67092	0.482421	0.671432	0.654208	0.663936	0.729792	0.576189	0.650647	0.570925	0.650894	0.731444	0.565871	0.608846	0.726635	0.69994	0.702859	0.799302	0.644917	0.466775	0.619629	0.4291	0.616424	0.533898	0.519157	0.711229	0.638744	0.661283	0.559724	0.604669
cg00634475	0.252674	0.282868	0.322381	0.303671	0.312836	0.291979	0.291851	0.242041	0.331462	0.314699	0.268746	0.276549	0.42111	0.24797	0.340201	0.174931	0.27912	0.241777	0.33565	0.319008	0.239124	0.233896	0.168397	0.290756	0.273027	0.393454	0.22819	0.614699	0.337234	0.254753	0.368617	0.62609	0.142661	0.241202	0.24147	0.219864	0.266042	0.280972	0.340078	0.293076	0.538357	0.193924	0.237617	0.403487	0.308418	0.224816	0.305579	0.534767	0.363911
cg04084260	0.499514	0.392222	0.347832	0.42946	0.514165	0.521043	0.28571	0.386459	0.53726	0.438899	0.427635	0.517931	0.588088	0.438955	0.504718	0.468626	0.527929	0.568361	0.429056	0.448691	0.385009	0.555482	0.560938	0.509217	0.439797	0.490445	0.522358	0.465691	0.527351	0.532312	0.463061	0.584362	0.374216	0.413459	0.450506	0.425007	0.370961	0.504764	0.588282	0.483233	0.740201	0.377795	0.449542	0.666756	0.453748	0.464217	0.519415	0.673949	0.562876
cg06796314	0.210603	0.151867	0.161575	0.221128	0.176023	0.309325	0.0558771	0.170021	0.211991	0.182425	0.138073	0.25496	0.146144	0.180758	0.316883	0.324763	0.247516	0.301549	0.0914774	0.121755	0.208773	0.335641	0.186488	0.264852	0.199946	0.101584	0.27126	0.183396	0.208518	0.20961	0.159756	0.386571	0.220427	0.12779	0.14975	0.184711	0.0777639	0.169961	0.216677	0.203529	0.50323	0.195681	0.186966	0.341018	0.102828	0.250224	0.211819	0.426037	0.274966
cg19896232	0.559362	0.438521	0.393053	0.532261	0.534251	0.581557	0.258916	0.455542	0.591415	0.587679	0.51931	0.651681	0.616018	0.481421	0.614835	0.649116	0.524854	0.617574	0.473169	0.479049	0.417303	0.677106	0.515648	0.520578	0.51082	0.664436	0.617217	0.469294	0.654928	0.545086	0.506484	0.605775	0.465811	0.453678	0.49029	0.481046	0.410459	0.541278	0.563994	0.632351	0.761924	0.520741	0.476086	0.671416	0.536368	0.537314	0.573465	0.675103	0.577622
cg11751993	0.384279	0.286771	0.250182	0.393197	0.397416	0.427249	0.14662	0.344853	0.399141	0.387459	0.323165	0.36857	0.374204	0.292485	0.363711	0.545598	0.294823	0.45192	0.208152	0.260195	0.269751	0.516452	0.267207	0.385514	0.388242	0.156853	0.2902	0.31226	0.408343	0.388953	0.312107	0.470422	0.365562	0.290647	0.32217	0.338104	0.246693	0.320328	0.321045	0.368396	0.54124	0.380769	0.354271	0.465884	0.259793	0.320585	0.363252	0.510486	0.288458
cg14107271	0.387453	0.254963	0.246775	0.325796	0.363698	0.389755	0.165642	0.258289	0.400219	0.354405	0.318833	0.357087	0.418252	0.310611	0.469622	0.394843	0.41676	0.404391	0.274174	0.291477	0.266004	0.461367	0.341913	0.385283	0.342932	0.342203	0.369171	0.38511	0.424006	0.378766	0.385415	0.451113	0.297513	0.262269	0.28693	0.320228	0.250236	0.388875	0.435186	0.399894	0.627551	0.28579	0.359995	0.502345	0.311391	0.355215	0.364055	0.561622	0.395137
cg05887508	0.200184	0.126738	0.121187	0.201743	0.189236	0.275663	0.0414022	0.0976302	0.184083	0.169439	0.15967	0.181342	0.204499	0.167298	0.236616	0.257413	0.277418	0.249598	0.125012	0.124992	0.117168	0.323247	0.18342	0.230108	0.190988	0.0944349	0.221552	0.205488	0.195861	0.16754	0.107884	0.320992	0.0953704	0.117473	0.13173	0.126957	0.0660959	0.13783	0.221187	0.234556	0.529656	0.123357	0.132575	0.348015	0.195724	0.140004	0.202461	0.451873	0.206482
cg22697477	0.574234	0.543003	0.375788	0.596823	0.636892	0.625278	0.23325	0.573793	0.644899	0.628203	0.538202	0.5519	0.546117	0.537799	0.560728	0.780674	0.655996	0.764601	0.351439	0.539513	0.548998	0.83561	0.596946	0.677143	0.518573	0.488429	0.662777	0.496885	0.665597	0.613488	0.429216	0.624361	0.660308	0.449898	0.533219	0.60788	0.422891	0.588654	0.6457	0.641207	0.837917	0.594899	0.571841	0.74948	0.456956	0.685988	0.602859	0.69673	0.528361
cg26696162	0.34592	0.272084	0.216785	0.358266	0.387022	0.379414	0.0858687	0.284368	0.41702	0.380707	0.338558	0.396556	0.361725	0.343089	0.347646	0.457999	0.331756	0.450931	0.209569	0.264828	0.339488	0.451578	0.293392	0.422803	0.321178	0.213034	0.372907	0.302234	0.410163	0.37694	0.285174	0.428776	0.407531	0.280918	0.277284	0.309158	0.230127	0.307153	0.3228	0.388574	0.584489	0.362707	0.316854	0.477202	0.276392	0.373519	0.347522	0.525524	0.37264
cg01113988	0.846178	0.913059	0.906031	0.796395	0.857263	0.854499	0.958446	0.887806	0.864569	0.815848	0.922956	0.887261	0.785895	0.89523	0.840254	0.688943	0.897732	0.937914	0.958292	0.9397	0.840795	0.751959	0.861924	0.882489	0.893212	0.916503	0.922595	0.784856	0.784415	0.83539	0.842608	0.653382	0.913754	0.896813	0.873283	0.885623	0.928533	0.900342	0.898654	0.810323	0.527021	0.872711	0.84732	0.728002	0.926953	0.808166	0.902339	0.518823	0.866591
cg15015109	0.534079	0.467527	0.391735	0.505732	0.592001	0.550661	0.247667	0.482447	0.586287	0.575091	0.489025	0.555984	0.540838	0.495915	0.520056	0.705587	0.501202	0.590151	0.365264	0.393999	0.461603	0.704339	0.470362	0.596738	0.53682	0.385149	0.567631	0.463841	0.604138	0.564896	0.431549	0.602586	0.560808	0.396297	0.480659	0.501515	0.407618	0.506013	0.581797	0.5146	0.741932	0.531955	0.477517	0.647624	0.433731	0.548318	0.486511	0.671052	0.533131
cg20184271	0.466036	0.408356	0.316435	0.506106	0.467458	0.524152	0.149588	0.418168	0.532496	0.481136	0.416951	0.481274	0.520886	0.396965	0.532325	0.714318	0.54342	0.547764	0.263519	0.361571	0.417284	0.717816	0.497054	0.490213	0.423275	0.477899	0.424586	0.440359	0.523923	0.505988	0.393361	0.50507	0.499147	0.282451	0.376351	0.464088	0.283314	0.455289	0.487841	0.496312	0.718834	0.488186	0.498059	0.64963	0.347046	0.474549	0.419466	0.665322	0.528643
cg03769206	0.517022	0.473813	0.32228	0.51897	0.602404	0.557724	0.215413	0.486484	0.607757	0.548225	0.477927	0.506305	0.47195	0.489556	0.541099	0.77209	0.555168	0.625294	0.324611	0.502901	0.498911	0.695957	0.507665	0.510978	0.506533	0.521479	0.572368	0.506641	0.540368	0.532042	0.467063	0.633355	0.597974	0.379417	0.448556	0.499156	0.4056	0.509901	0.622807	0.494083	0.780207	0.558433	0.502413	0.675831	0.381353	0.594092	0.517665	0.720175	0.540846
cg27302237	0.209935	0.171917	0.161951	0.198377	0.253207	0.272217	0.0549221	0.145555	0.32098	0.270495	0.168371	0.257094	0.295841	0.168936	0.31347	0.311607	0.319313	0.274618	0.163498	0.174337	0.125653	0.36478	0.229123	0.27093	0.234291	0.223843	0.289497	0.262887	0.353477	0.291148	0.213936	0.377335	0.129572	0.135169	0.195396	0.210162	0.108654	0.22147	0.251343	0.281279	0.512784	0.189907	0.232539	0.411125	0.203132	0.149531	0.243568	0.467837	0.289321
cg04188723	0.524841	0.489329	0.393873	0.561529	0.561405	0.583314	0.205792	0.480825	0.591322	0.584596	0.512891	0.618232	0.580799	0.488681	0.60233	0.76242	0.557203	0.660573	0.42207	0.468523	0.496805	0.774267	0.53064	0.580412	0.507168	0.495452	0.588164	0.46137	0.629046	0.53305	0.4875	0.577964	0.525839	0.422722	0.50506	0.534719	0.39161	0.512123	0.535363	0.583303	0.77771	0.529679	0.470751	0.681534	0.473539	0.554292	0.562937	0.740843	0.524468
cg09615493	0.0786322	0.0762092	0.140564	0.0984452	0.0881384	0.103574	0.0468094	0.0549267	0.0316924	0.0767498	0.060498	0.0852355	0.0741035	0.080094	0.0655713	0.0884536	0.0507854	0.0555968	0.0565054	0.043265	0.0445272	0.113203	0.0381779	0.0588513	0.0625393	0.097246	0.0742632	0.24378	0.0890413	0.031621	0.0583133	0.434804	0.0203517	0.0418085	0.0559296	0.0529475	0.0513385	0.0826804	0.0687061	0.103995	0.339889	0.0256347	0.0365753	0.122889	0.0782509	0.0683103	0.10362	0.279811	0.0338366
cg15138115	0.650655	0.512238	0.481736	0.57432	0.654421	0.632425	0.338238	0.510015	0.632679	0.645651	0.573021	0.712548	0.594572	0.575027	0.644879	0.745593	0.695859	0.677218	0.559766	0.544332	0.492685	0.813451	0.58626	0.678983	0.576265	0.561508	0.55489	0.612762	0.705928	0.62287	0.674778	0.74282	0.57562	0.540033	0.595278	0.630019	0.48291	0.654534	0.739908	0.680977	0.914198	0.486409	0.680954	0.737359	0.588885	0.62961	0.63199	0.749937	0.715574
cg17158002	0.464105	0.473359	0.472717	0.485564	0.486237	0.510158	0.43525	0.419171	0.563098	0.530373	0.531398	0.582198	0.531211	0.468763	0.516031	0.545354	0.488791	0.520984	0.481899	0.460441	0.414732	0.483354	0.455615	0.438063	0.47578	0.552319	0.498239	0.60385	0.558425	0.515117	0.569554	0.591869	0.336184	0.449596	0.474081	0.432094	0.460086	0.488024	0.494532	0.629557	0.669805	0.434612	0.458532	0.611316	0.523229	0.464463	0.523463	0.682965	0.617287
cg07127456	0.493802	0.657483	0.635821	0.58076	0.415452	0.499389	0.503718	0.615086	0.576962	0.592661	0.612138	0.57323	0.565066	0.631028	0.5198	0.505958	0.494027	0.484329	0.653627	0.613429	0.652601	0.439106	0.555791	0.646206	0.57399	0.356107	0.527661	0.5159	0.48089	0.562959	0.646617	0.530378	0.491323	0.654672	0.637477	0.606553	0.634705	0.59318	0.578015	0.539765	0.342194	0.472771	0.390336	0.406251	0.630123	0.548819	0.568992	0.408706	0.542339
cg15221848	0.444295	0.469692	0.371103	0.535186	0.430214	0.529964	0.205011	0.403448	0.538671	0.574068	0.474618	0.512682	0.47063	0.387689	0.483911	0.628277	0.517945	0.672606	0.338945	0.443943	0.396944	0.726546	0.411364	0.595219	0.475192	0.195421	0.450584	0.387345	0.53544	0.486164	0.394158	0.539768	0.50059	0.315722	0.385869	0.514841	0.340803	0.469156	0.503081	0.409754	0.8029	0.526637	0.40886	0.622137	0.37376	0.523403	0.466149	0.715595	0.524336
cg07975200	0.285662	0.304102	0.189644	0.237948	0.318641	0.357339	0.0987294	0.145118	0.412779	0.386904	0.375722	0.374348	0.384254	0.235868	0.383281	0.324405	0.324216	0.417975	0.423403	0.223282	0.0769928	0.333989	0.253757	0.30893	0.340607	0.413966	0.374494	0.452323	0.406006	0.348466	0.316355	0.490215	0.189929	0.109151	0.209831	0.140206	0.268032	0.400235	0.501135	0.455259	0.518047	0.282831	0.294283	0.449976	0.310698	0.221601	0.359609	0.517288	0.388417
cg15903956	0.602766	0.710712	0.74264	0.62879	0.592748	0.599942	0.817019	0.68595	0.596063	0.617436	0.640522	0.590754	0.596955	0.689259	0.611827	0.452132	0.641724	0.548558	0.741491	0.658389	0.658249	0.416733	0.605361	0.639354	0.680202	0.676123	0.60976	0.657534	0.550775	0.605059	0.657587	0.583227	0.590979	0.746258	0.665062	0.634133	0.717243	0.620694	0.612272	0.54507	0.383765	0.573851	0.5487	0.475697	0.712	0.566259	0.641522	0.441955	0.629963
cg02771343	0.758215	0.84609	0.880755	0.778038	0.737717	0.773043	0.8855	0.871039	0.741266	0.766909	0.777618	0.72126	0.695093	0.801334	0.712398	0.729346	0.7767	0.713437	0.812372	0.772706	0.884221	0.652474	0.744998	0.799162	0.827552	0.747622	0.765205	0.739149	0.65234	0.72204	0.82211	0.689509	0.876579	0.861751	0.86805	0.810916	0.8709	0.744921	0.706769	0.67906	0.454291	0.819265	0.726025	0.628632	0.770007	0.776719	0.789297	0.561813	0.791415
cg07713288	0.661253	0.714154	0.770751	0.652734	0.634018	0.585412	0.864057	0.706326	0.645629	0.627346	0.726317	0.683546	0.740848	0.695553	0.606907	0.366707	0.705148	0.580195	0.811954	0.708439	0.635193	0.437824	0.635311	0.625238	0.709163	0.789952	0.646728	0.674464	0.68153	0.575247	0.820838	0.565374	0.600527	0.74729	0.712072	0.701305	0.753389	0.70638	0.618517	0.576037	0.399927	0.602192	0.55781	0.521689	0.749139	0.608396	0.682117	0.485367	0.62549
cg08778768	0.301646	0.215785	0.176713	0.269843	0.34107	0.354107	0.0502971	0.224494	0.35934	0.316847	0.269427	0.360683	0.332778	0.297496	0.275834	0.363151	0.36961	0.431377	0.208962	0.220991	0.251159	0.46597	0.256127	0.305246	0.164932	0.23961	0.295928	0.218912	0.322853	0.312322	0.309901	0.321588	0.200739	0.183953	0.215497	0.243759	0.16619	0.320144	0.286681	0.364701	0.581453	0.257483	0.226854	0.445348	0.228761	0.29321	0.272657	0.460756	0.430739
cg10728282	0.395841	0.326481	0.324984	0.386786	0.431182	0.399282	0.235983	0.319463	0.44438	0.447377	0.418175	0.408903	0.460257	0.319092	0.443186	0.493256	0.413086	0.459319	0.390164	0.341903	0.247915	0.494307	0.325999	0.282777	0.408677	0.373599	0.358923	0.456445	0.45378	0.342973	0.398228	0.51383	0.233073	0.296047	0.297263	0.310528	0.2687	0.371129	0.403467	0.429954	0.56037	0.336102	0.267725	0.507912	0.374105	0.350168	0.339445	0.630794	0.41229
cg25775667	0.185762	0.102971	0.136049	0.197561	0.157876	0.240573	0.0370178	0.133272	0.198145	0.150299	0.108879	0.186556	0.205163	0.150949	0.240726	0.217805	0.184063	0.225057	0.114911	0.153057	0.14105	0.201204	0.164653	0.216207	0.22875	0.0626585	0.233432	0.192012	0.254868	0.195586	0.165644	0.266344	0.121981	0.107019	0.150061	0.0992505	0.0802268	0.123104	0.170622	0.219046	0.410961	0.159019	0.168978	0.307079	0.115048	0.142626	0.199917	0.368843	0.192729
cg07369212	0.754748	0.800326	0.798888	0.696616	0.799543	0.740343	0.849693	0.785125	0.722893	0.73103	0.773162	0.673835	0.776405	0.800909	0.744039	0.584278	0.806739	0.73046	0.869864	0.830702	0.793606	0.580891	0.68413	0.780944	0.751459	0.785131	0.76891	0.696951	0.682858	0.722688	0.787504	0.632056	0.792182	0.816016	0.859967	0.768255	0.861053	0.810157	0.73896	0.680748	0.481588	0.765829	0.771306	0.611016	0.788453	0.755791	0.748524	0.577569	0.66809
cg17945429	0.638872	0.745044	0.755787	0.655673	0.652351	0.597065	0.848554	0.673157	0.662742	0.680037	0.719064	0.652614	0.680156	0.731231	0.61401	0.397817	0.65634	0.531402	0.786068	0.781272	0.704058	0.463113	0.657805	0.65771	0.700993	0.811671	0.694832	0.659427	0.592634	0.621226	0.680904	0.637521	0.641866	0.730981	0.747236	0.709647	0.779881	0.743417	0.681499	0.617509	0.443447	0.606101	0.619157	0.519715	0.694738	0.676316	0.69577	0.567563	0.664406
cg25926001	0.412461	0.356736	0.310133	0.422922	0.511387	0.453353	0.127927	0.320597	0.477628	0.466836	0.364917	0.534285	0.488824	0.359537	0.446261	0.635634	0.445729	0.511014	0.272808	0.305715	0.346418	0.568451	0.466956	0.461316	0.458941	0.341899	0.427767	0.410713	0.511775	0.439044	0.356617	0.515192	0.376974	0.323145	0.363583	0.361265	0.266049	0.378608	0.417249	0.496213	0.717869	0.364963	0.368704	0.577644	0.294171	0.434042	0.417122	0.625466	0.45059
cg16727485	0.564794	0.569815	0.491641	0.58238	0.650388	0.63957	0.421276	0.512231	0.696195	0.651553	0.636311	0.654925	0.647399	0.57645	0.661474	0.755289	0.702417	0.610607	0.502067	0.544517	0.511932	0.716778	0.513968	0.625674	0.663527	0.544299	0.606416	0.585804	0.639686	0.622793	0.587002	0.71282	0.518193	0.516206	0.516406	0.562002	0.484136	0.594817	0.650356	0.565154	0.825855	0.550486	0.564298	0.746113	0.651121	0.562487	0.656601	0.776295	0.655955
cg03627196	0.555762	0.553937	0.341021	0.573204	0.689762	0.578175	0.253651	0.536372	0.655364	0.593155	0.431586	0.48417	0.487515	0.470901	0.620495	0.775461	0.545544	0.777198	0.359097	0.561967	0.482792	0.798674	0.574194	0.533913	0.622027	0.48398	0.546598	0.53711	0.739668	0.604145	0.50876	0.682163	0.588109	0.47268	0.656494	0.562402	0.449919	0.588037	0.680405	0.615397	0.835225	0.540583	0.664781	0.680585	0.498749	0.562854	0.588714	0.78833	0.581021
cg02569115	0.588756	0.4805	0.444318	0.558497	0.598506	0.608917	0.279112	0.533952	0.601211	0.597128	0.524874	0.547782	0.504607	0.543903	0.510445	0.709556	0.594807	0.633585	0.416003	0.525352	0.468508	0.671691	0.615561	0.551518	0.587107	0.441785	0.604203	0.592694	0.658958	0.610409	0.486854	0.662868	0.538743	0.491172	0.46512	0.548612	0.381896	0.490339	0.560474	0.591685	0.710659	0.567815	0.456796	0.653727	0.514104	0.670259	0.592748	0.673234	0.521611
cg14151544	0.470958	0.435211	0.355689	0.469244	0.516413	0.479266	0.263523	0.472545	0.529051	0.49877	0.461842	0.556664	0.538122	0.464148	0.440886	0.62	0.463366	0.580879	0.338012	0.416714	0.447655	0.672721	0.468934	0.515936	0.483386	0.459285	0.504247	0.428823	0.545636	0.508375	0.470275	0.534121	0.51133	0.373586	0.454433	0.470103	0.373768	0.497153	0.519042	0.492583	0.693383	0.501696	0.449475	0.600679	0.407898	0.517393	0.478669	0.604243	0.485399
cg21567397	0.519089	0.44191	0.420275	0.536535	0.520733	0.558511	0.174042	0.481458	0.591149	0.543492	0.512514	0.588357	0.573867	0.481039	0.57496	0.76072	0.505823	0.644473	0.354013	0.429463	0.511502	0.737582	0.505249	0.552708	0.477449	0.43156	0.550283	0.398928	0.604268	0.550865	0.427598	0.564306	0.49018	0.408384	0.477994	0.532332	0.306606	0.488477	0.526068	0.547085	0.77409	0.564491	0.484875	0.682888	0.47324	0.513059	0.538946	0.669745	0.602235
cg03204608	0.475075	0.420144	0.29029	0.542487	0.491134	0.558576	0.18646	0.423395	0.554007	0.500928	0.499321	0.531575	0.521004	0.419813	0.412264	0.675598	0.499143	0.615071	0.297353	0.400727	0.468265	0.657089	0.413581	0.529253	0.458738	0.409582	0.492353	0.423394	0.601525	0.465936	0.407012	0.544311	0.51964	0.340916	0.444554	0.477589	0.345128	0.450365	0.452679	0.502417	0.734279	0.521678	0.428618	0.667838	0.374114	0.486571	0.513146	0.681033	0.505293
cg04159302	0.498696	0.401344	0.398672	0.485812	0.531371	0.450864	0.236959	0.517967	0.531409	0.50041	0.441059	0.448295	0.478259	0.437111	0.480602	0.748115	0.45513	0.521866	0.374772	0.395327	0.359857	0.603609	0.405115	0.466656	0.446278	0.487737	0.478015	0.539761	0.614862	0.46896	0.463435	0.657541	0.498493	0.388043	0.451351	0.50327	0.371385	0.44771	0.469922	0.483224	0.744892	0.553753	0.433838	0.602186	0.442193	0.543353	0.456602	0.728838	0.44742
cg21858653	0.475985	0.354685	0.322643	0.431316	0.505681	0.460005	0.219693	0.378667	0.510264	0.444438	0.407646	0.464581	0.486386	0.400784	0.449366	0.441027	0.497591	0.514588	0.37743	0.404364	0.372241	0.518995	0.450303	0.465115	0.434912	0.494862	0.491337	0.475446	0.558744	0.441722	0.463499	0.522402	0.389696	0.409385	0.450546	0.436397	0.35673	0.464927	0.536008	0.483568	0.670296	0.403454	0.398725	0.59793	0.414979	0.432554	0.441976	0.604919	0.453909
cg17404760	0.878253	0.902951	0.847765	0.888231	0.882023	0.874727	0.893995	0.896909	0.871641	0.881673	0.889597	0.803252	0.847896	0.888828	0.8855	0.813971	0.831597	0.868017	0.913736	0.935042	0.943365	0.91563	0.86986	0.916478	0.928255	0.676884	0.867769	0.764903	0.822636	0.872793	0.875258	0.650799	0.944068	0.891241	0.939317	0.919265	0.922376	0.90836	0.840796	0.836939	0.6515	0.907145	0.804062	0.727181	0.844058	0.886248	0.814657	0.673594	0.863518
cg16805334	0.804517	0.875627	0.922037	0.846034	0.773266	0.827464	0.934975	0.872481	0.767112	0.766965	0.825182	0.788237	0.783551	0.875791	0.808826	0.757549	0.799998	0.736411	0.891924	0.851024	0.928029	0.645064	0.858563	0.844905	0.8796	0.852599	0.806397	0.844276	0.719047	0.78364	0.827012	0.808754	0.885572	0.898709	0.889686	0.870323	0.88816	0.772709	0.77924	0.684402	0.605175	0.864258	0.833912	0.713543	0.818766	0.833219	0.798239	0.695817	0.806039
cg01620379	0.463419	0.418524	0.301718	0.453313	0.532788	0.475044	0.182672	0.410308	0.575617	0.50939	0.458165	0.489279	0.483011	0.435615	0.470845	0.680104	0.512287	0.60468	0.305765	0.421883	0.412412	0.685087	0.471506	0.498083	0.493395	0.383749	0.539917	0.416689	0.533888	0.507033	0.441689	0.503148	0.470823	0.369737	0.383709	0.471506	0.324009	0.530885	0.591629	0.512233	0.74718	0.463941	0.473276	0.633681	0.350302	0.505385	0.467564	0.695669	0.5517
cg15265384	0.48008	0.56344	0.627702	0.501818	0.46421	0.465712	0.680126	0.525376	0.495704	0.496055	0.529296	0.436306	0.492359	0.534408	0.536326	0.33577	0.498676	0.400695	0.609727	0.577756	0.540763	0.322134	0.287436	0.506542	0.558359	0.57132	0.514714	0.557977	0.445153	0.463733	0.457624	0.528255	0.462071	0.578135	0.563857	0.51097	0.612941	0.489916	0.426041	0.394593	0.273214	0.495428	0.43681	0.34023	0.536948	0.469177	0.51326	0.354805	0.443842
cg20571993	0.880388	0.924313	0.887459	0.887815	0.888761	0.88105	0.931432	0.917051	0.89246	0.894427	0.920379	0.877442	0.901134	0.909196	0.855547	0.792394	0.92719	0.832073	0.935691	0.949026	0.915208	0.816682	0.897438	0.916411	0.899253	0.897862	0.882759	0.810571	0.85513	0.865283	0.897101	0.718791	0.929897	0.904639	0.942884	0.933269	0.94186	0.903522	0.881774	0.836948	0.648201	0.873759	0.893354	0.783077	0.912523	0.90329	0.883707	0.709183	0.916034
cg14586500	0.396617	0.306969	0.255846	0.399404	0.429715	0.387152	0.111843	0.327841	0.445889	0.39696	0.388405	0.458995	0.39231	0.35981	0.348789	0.533412	0.461412	0.472212	0.273549	0.294711	0.35766	0.539819	0.369667	0.442936	0.370517	0.294515	0.434236	0.324191	0.432508	0.423811	0.33575	0.464962	0.349252	0.274268	0.347768	0.357605	0.247648	0.323915	0.376224	0.433764	0.59951	0.364585	0.341437	0.517052	0.265237	0.37318	0.318088	0.563195	0.401441
cg26919551	0.506978	0.53264	0.57734	0.490653	0.49577	0.530737	0.658453	0.524555	0.52936	0.492664	0.538919	0.516618	0.591343	0.536393	0.507878	0.287289	0.607768	0.435977	0.636152	0.546663	0.539732	0.28468	0.570028	0.511966	0.553598	0.599427	0.470063	0.492941	0.456888	0.483608	0.587806	0.464235	0.540752	0.568942	0.537488	0.529637	0.609959	0.505897	0.438914	0.461762	0.298814	0.466738	0.451714	0.384347	0.59282	0.476167	0.503016	0.413691	0.449901
cg11860896	0.707694	0.798479	0.830381	0.695833	0.683832	0.703699	0.925235	0.745422	0.712282	0.722586	0.779568	0.68392	0.817422	0.749114	0.728579	0.575502	0.750387	0.628051	0.837566	0.81742	0.772903	0.530796	0.697034	0.705817	0.748553	0.861189	0.678647	0.767063	0.703491	0.704306	0.820285	0.641531	0.681621	0.809399	0.762757	0.74858	0.825748	0.78101	0.747603	0.647354	0.506653	0.695478	0.689241	0.593604	0.81589	0.708603	0.715934	0.595109	0.744082
cg10054027	0.827495	0.896972	0.860835	0.845827	0.844969	0.822019	0.922355	0.870217	0.837201	0.867082	0.897399	0.77903	0.827036	0.862452	0.800199	0.737585	0.833092	0.821281	0.868214	0.907174	0.905473	0.804635	0.850497	0.866564	0.889937	0.83241	0.83443	0.821586	0.871631	0.813737	0.876586	0.794738	0.925378	0.90576	0.899216	0.854218	0.908709	0.856551	0.817474	0.790508	0.695432	0.860667	0.849019	0.737041	0.793295	0.863334	0.828513	0.694315	0.808452
cg04791659	0.127407	0.199673	0.148403	0.194557	0.18278	0.189751	0.0623596	0.143207	0.178876	0.186273	0.147067	0.189955	0.190749	0.124437	0.188775	0.233629	0.136449	0.24289	0.126643	0.101704	0.150725	0.274036	0.11347	0.161896	0.187046	0.146214	0.125365	0.217535	0.187559	0.182442	0.137782	0.345021	0.201487	0.129783	0.0843185	0.139651	0.104701	0.135438	0.171875	0.163763	0.382257	0.175794	0.12009	0.267567	0.115913	0.120737	0.126472	0.327191	0.164031
cg18455472	0.436938	0.294647	0.258009	0.393915	0.406075	0.518817	0.120296	0.288371	0.488604	0.394151	0.344325	0.479527	0.46664	0.372232	0.480927	0.490724	0.518804	0.576791	0.27909	0.306872	0.247713	0.552538	0.396725	0.460743	0.380769	0.380834	0.493364	0.42588	0.536357	0.432098	0.393942	0.522795	0.302413	0.284356	0.344359	0.355835	0.217984	0.413875	0.474552	0.4627	0.739125	0.355223	0.363954	0.617332	0.36043	0.395323	0.442145	0.669508	0.472268
cg02138322	0.609118	0.658567	0.542941	0.608669	0.63321	0.656112	0.448641	0.551385	0.70482	0.741609	0.617958	0.623134	0.674973	0.554066	0.707848	0.856575	0.702879	0.622044	0.551012	0.552702	0.585965	0.74049	0.562622	0.598577	0.657475	0.707934	0.594674	0.808904	0.740003	0.717831	0.687081	0.809151	0.589233	0.560036	0.562301	0.548911	0.538562	0.689219	0.70201	0.625601	0.82478	0.594956	0.62947	0.746338	0.54667	0.60711	0.58931	0.845961	0.628152
cg18147181	0.209417	0.245076	0.186507	0.269537	0.266497	0.310979	0.0411875	0.158217	0.32621	0.311613	0.238869	0.286127	0.411286	0.141015	0.357529	0.445949	0.245541	0.23681	0.14912	0.159166	0.133959	0.46074	0.168023	0.177746	0.237385	0.378374	0.16599	0.512565	0.428103	0.328164	0.242947	0.673549	0.166101	0.120601	0.150228	0.150807	0.126259	0.220279	0.242377	0.333044	0.677494	0.185	0.15781	0.426172	0.138387	0.154151	0.18433	0.673238	0.234021
cg05257483	0.385205	0.345795	0.290974	0.407174	0.448448	0.456395	0.171237	0.363879	0.506922	0.424937	0.403338	0.481387	0.413182	0.318047	0.370199	0.565716	0.477615	0.541544	0.201719	0.267509	0.40744	0.654571	0.344861	0.546245	0.422821	0.111193	0.415689	0.296473	0.501012	0.418589	0.277499	0.405244	0.454613	0.282066	0.150543	0.377425	0.25157	0.333862	0.387127	0.331611	0.661518	0.379677	0.349321	0.534324	0.337746	0.398406	0.398857	0.629004	0.399614
cg23027596	0.340951	0.252202	0.283314	0.327918	0.35043	0.308113	0.200372	0.248798	0.339146	0.300141	0.295663	0.358644	0.351267	0.318703	0.384996	0.467084	0.31959	0.391775	0.294044	0.286444	0.228992	0.384463	0.265217	0.330226	0.269646	0.389913	0.367805	0.328092	0.395495	0.329699	0.368905	0.405816	0.229242	0.298158	0.267502	0.246821	0.254809	0.312825	0.303541	0.38564	0.48007	0.246726	0.274533	0.44081	0.335311	0.286524	0.321739	0.490793	0.462793
cg07749151	0.615878	0.639546	0.499196	0.612193	0.705501	0.718417	0.544369	0.517528	0.720865	0.70331	0.669728	0.703421	0.731493	0.579426	0.666702	0.716059	0.595579	0.743916	0.457573	0.6708	0.502926	0.732774	0.488341	0.614508	0.656608	0.622661	0.628365	0.703483	0.69329	0.714276	0.682817	0.796261	0.641719	0.529112	0.639946	0.531519	0.621516	0.658661	0.665178	0.666854	0.77422	0.584843	0.612834	0.765736	0.650969	0.676282	0.655291	0.84509	0.740892
cg14114546	0.425123	0.407784	0.312985	0.389331	0.44224	0.521092	0.15638	0.300705	0.517324	0.539679	0.410041	0.477916	0.518138	0.363075	0.43832	0.5593	0.590939	0.600153	0.243023	0.32498	0.346288	0.645248	0.432328	0.389014	0.439724	0.429011	0.404996	0.499116	0.47515	0.498798	0.36501	0.508258	0.418754	0.298185	0.369661	0.410724	0.264243	0.516161	0.542773	0.476424	0.796319	0.423821	0.476295	0.627125	0.420062	0.383007	0.492861	0.79567	0.500439
cg23138978	0.523325	0.499343	0.387751	0.573041	0.613989	0.558832	0.314216	0.470684	0.524808	0.612515	0.539904	0.58227	0.577282	0.442752	0.558177	0.7852	0.533056	0.630019	0.407172	0.450617	0.423298	0.68883	0.46036	0.583172	0.522807	0.534053	0.441809	0.827639	0.642533	0.585212	0.447171	0.892206	0.576457	0.426375	0.493534	0.459153	0.359585	0.52076	0.654149	0.578955	0.911277	0.479325	0.475412	0.709674	0.37724	0.590622	0.540441	0.830094	0.455595
cg02841912	0.321433	0.197887	0.199631	0.268629	0.297719	0.397063	0.0913229	0.219112	0.427682	0.308962	0.264462	0.409475	0.421755	0.226788	0.469433	0.48337	0.3775	0.405096	0.192852	0.198084	0.219626	0.424655	0.277521	0.329753	0.262316	0.273864	0.387508	0.268703	0.408536	0.284525	0.30788	0.44947	0.274847	0.161143	0.216998	0.258781	0.104899	0.302142	0.381911	0.386722	0.654935	0.213295	0.214364	0.536075	0.312724	0.247317	0.305215	0.65717	0.311705
cg27514322	0.613347	0.66052	0.596242	0.656273	0.665339	0.678122	0.333398	0.608059	0.698431	0.686573	0.613724	0.668238	0.678874	0.599108	0.633378	0.719701	0.709544	0.726737	0.596832	0.551902	0.652201	0.842533	0.635318	0.671755	0.687286	0.528269	0.64213	0.654995	0.761484	0.655712	0.581376	0.749349	0.692703	0.571566	0.661829	0.676498	0.521547	0.666865	0.640226	0.698707	0.841535	0.663558	0.670517	0.792863	0.588923	0.661639	0.675184	0.808209	0.604643
cg07655227	0.457245	0.326512	0.354161	0.435288	0.472461	0.454871	0.193331	0.361869	0.554827	0.444478	0.410117	0.386907	0.424826	0.354203	0.509968	0.58621	0.383424	0.580079	0.338922	0.338805	0.307863	0.585712	0.361065	0.455394	0.408654	0.350336	0.492657	0.364404	0.498171	0.446691	0.389431	0.499617	0.2454	0.37057	0.332895	0.393553	0.196409	0.364391	0.503347	0.500976	0.694455	0.353709	0.376986	0.571535	0.416804	0.457928	0.397333	0.584962	0.47649
cg02805790	0.381536	0.317935	0.234932	0.381925	0.421169	0.442417	0.13117	0.308998	0.433757	0.412644	0.348541	0.425345	0.430797	0.34445	0.38585	0.486178	0.438949	0.480755	0.20615	0.347414	0.284031	0.544563	0.35545	0.412835	0.363752	0.288084	0.447576	0.377034	0.4895	0.423956	0.348752	0.477951	0.287876	0.268726	0.28332	0.368562	0.213207	0.342428	0.381329	0.406938	0.605432	0.372065	0.296886	0.526105	0.319267	0.343775	0.37831	0.549936	0.408825
cg00462170	0.735423	0.821618	0.787445	0.74505	0.797536	0.731716	0.889509	0.824417	0.735964	0.795892	0.783356	0.682034	0.721438	0.795903	0.701266	0.452129	0.681501	0.753605	0.834321	0.90682	0.857316	0.604459	0.790808	0.786636	0.856284	0.67456	0.726109	0.664739	0.660098	0.749599	0.753974	0.645748	0.877058	0.842415	0.798131	0.872923	0.887595	0.790785	0.692274	0.686637	0.413795	0.774117	0.703838	0.548478	0.73609	0.747255	0.690078	0.507936	0.690779
cg00382999	0.46688	0.415842	0.309163	0.509003	0.489981	0.516886	0.149809	0.416399	0.573162	0.546624	0.443374	0.522619	0.518726	0.415124	0.569449	0.706795	0.523145	0.603631	0.295699	0.416508	0.445905	0.669373	0.407164	0.572916	0.449434	0.36209	0.503042	0.343327	0.550953	0.500669	0.406596	0.490615	0.554316	0.297093	0.435021	0.464142	0.316206	0.448312	0.490278	0.509303	0.676824	0.556177	0.538672	0.609763	0.37388	0.494173	0.476718	0.617902	0.544051
cg13034073	0.532913	0.523962	0.496898	0.523935	0.587303	0.595014	0.564653	0.534655	0.558693	0.593894	0.551536	0.575795	0.578834	0.523277	0.52364	0.733768	0.547706	0.595278	0.486723	0.471126	0.514593	0.64302	0.518517	0.593308	0.591381	0.547424	0.548526	0.621687	0.629586	0.596567	0.534955	0.734351	0.55554	0.457387	0.578088	0.513441	0.454183	0.562619	0.619953	0.525078	0.791312	0.500159	0.495626	0.65985	0.463109	0.545265	0.537987	0.764853	0.533799
cg24278397	0.199503	0.168432	0.164295	0.199405	0.246092	0.230654	0.115444	0.182221	0.233477	0.209891	0.192392	0.224587	0.206447	0.187269	0.216465	0.244548	0.238914	0.215972	0.185221	0.149561	0.16365	0.244446	0.166697	0.205056	0.233754	0.166211	0.195872	0.3854	0.25744	0.193179	0.222033	0.413712	0.144759	0.151391	0.144674	0.164214	0.12484	0.194916	0.249271	0.205935	0.412067	0.183304	0.17042	0.311281	0.160807	0.20331	0.194488	0.44749	0.194795
cg24598398	0.634989	0.822784	0.736901	0.657554	0.738176	0.632703	0.84567	0.755855	0.684426	0.724735	0.754831	0.622973	0.727985	0.729166	0.675619	0.461368	0.731963	0.668586	0.804022	0.765037	0.695393	0.511616	0.7251	0.720377	0.740968	0.735657	0.645268	0.748026	0.715812	0.677949	0.823877	0.619513	0.670004	0.771177	0.763058	0.712243	0.806531	0.789002	0.710896	0.684163	0.489049	0.693313	0.626026	0.565361	0.773718	0.718827	0.660647	0.588126	0.688103
cg27519105	0.35522	0.23743	0.229152	0.35428	0.345019	0.39915	0.111244	0.248553	0.352519	0.357379	0.31192	0.373822	0.360968	0.289328	0.344086	0.483112	0.353496	0.481273	0.200599	0.256145	0.303219	0.435649	0.331783	0.370796	0.335922	0.22339	0.38542	0.320272	0.398792	0.358149	0.288716	0.465616	0.316824	0.214644	0.29939	0.31737	0.191855	0.242947	0.328672	0.343419	0.610388	0.332013	0.325483	0.491332	0.235691	0.308289	0.352452	0.570933	0.349848
cg18758891	0.513195	0.42449	0.369621	0.469693	0.573626	0.56407	0.15291	0.39598	0.576793	0.547726	0.488385	0.565649	0.544437	0.42967	0.507504	0.722178	0.440673	0.614267	0.370517	0.436932	0.424621	0.652069	0.464024	0.567889	0.455204	0.366052	0.557616	0.531471	0.649691	0.492132	0.490927	0.610801	0.407764	0.404413	0.46782	0.396345	0.306733	0.491939	0.547335	0.649598	0.77547	0.485411	0.490617	0.647076	0.424955	0.500932	0.468512	0.712879	0.550955
cg22825487	0.548859	0.506934	0.374801	0.598577	0.613433	0.567266	0.192169	0.494617	0.617394	0.581942	0.479745	0.526689	0.623351	0.47078	0.589461	0.777693	0.622295	0.697493	0.373419	0.378559	0.520851	0.797661	0.384487	0.596525	0.498012	0.448755	0.641167	0.464988	0.669166	0.542569	0.452815	0.558285	0.663222	0.437311	0.475449	0.538517	0.385867	0.551763	0.613597	0.591745	0.75585	0.662436	0.53066	0.714739	0.516551	0.503561	0.543124	0.730562	0.58842
cg07493562	0.364992	0.398763	0.338135	0.379892	0.440172	0.459512	0.258956	0.274463	0.424752	0.435023	0.403022	0.425238	0.414926	0.352535	0.43987	0.613026	0.421493	0.552372	0.305712	0.331055	0.348544	0.591235	0.363143	0.426678	0.426334	0.282588	0.417778	0.446672	0.439314	0.419522	0.403896	0.570369	0.365034	0.35705	0.333348	0.374469	0.290221	0.39311	0.399981	0.414313	0.673813	0.384445	0.407282	0.53012	0.306797	0.420805	0.413892	0.576788	0.400505
cg04430911	0.482017	0.378803	0.352448	0.475819	0.49269	0.488753	0.202877	0.425997	0.517431	0.490882	0.444245	0.504677	0.45761	0.442052	0.439127	0.632852	0.475509	0.539662	0.327038	0.383981	0.416694	0.60523	0.455739	0.515353	0.477475	0.398271	0.507349	0.436694	0.549266	0.504167	0.436843	0.497516	0.489521	0.395664	0.444844	0.482254	0.361995	0.431462	0.457421	0.485099	0.652978	0.476855	0.410884	0.580404	0.365315	0.473265	0.431856	0.587942	0.461747
cg03898408	0.280565	0.165695	0.160108	0.250872	0.255657	0.269432	0.0557916	0.201631	0.316433	0.253407	0.217492	0.280059	0.293766	0.220263	0.305423	0.296724	0.31367	0.345045	0.205661	0.209832	0.171639	0.378434	0.247441	0.291798	0.242512	0.226385	0.322312	0.27252	0.324236	0.286656	0.288675	0.331831	0.180703	0.189061	0.201435	0.220836	0.150019	0.246551	0.292809	0.308639	0.486419	0.212573	0.207588	0.374917	0.200618	0.222767	0.257498	0.412077	0.406735
cg20436925	0.491172	0.446901	0.343145	0.512563	0.53249	0.545398	0.213621	0.424082	0.554974	0.538124	0.457863	0.546685	0.535763	0.418079	0.531932	0.740378	0.497946	0.624384	0.314755	0.446306	0.433661	0.696642	0.441078	0.564388	0.522835	0.324414	0.543499	0.381549	0.557168	0.535267	0.443511	0.539103	0.488504	0.355677	0.435226	0.50325	0.360313	0.462223	0.505311	0.511261	0.727131	0.519172	0.482901	0.627165	0.434943	0.499421	0.528645	0.613652	0.522321
cg23310123	0.319245	0.293361	0.293339	0.344199	0.327508	0.358562	0.275093	0.299495	0.326324	0.264195	0.270295	0.298583	0.373112	0.31203	0.436933	0.267341	0.321065	0.416003	0.347293	0.346047	0.206498	0.270424	0.355041	0.316267	0.274735	0.356824	0.353305	0.397443	0.319683	0.312143	0.289079	0.427695	0.214802	0.310131	0.367493	0.255938	0.294218	0.320487	0.310221	0.313541	0.524186	0.286143	0.31821	0.449495	0.317461	0.308152	0.3972	0.496675	0.365197
cg06792126	0.4212	0.337643	0.325316	0.398921	0.423162	0.42217	0.21384	0.375289	0.429226	0.419785	0.374129	0.423599	0.435099	0.402648	0.43437	0.440388	0.354419	0.547244	0.32223	0.359061	0.341088	0.503864	0.301233	0.452774	0.437476	0.277741	0.452661	0.406575	0.518546	0.448379	0.370321	0.550528	0.349162	0.329279	0.401517	0.383846	0.285245	0.406588	0.432278	0.478701	0.646562	0.355675	0.377535	0.477492	0.364787	0.376984	0.409177	0.596961	0.414377
cg08168943	0.803649	0.859775	0.843441	0.849533	0.820724	0.823973	0.887483	0.844857	0.765092	0.823717	0.87198	0.761359	0.733362	0.855432	0.713091	0.778811	0.857137	0.768397	0.853554	0.835025	0.834659	0.734152	0.805304	0.882059	0.830436	0.860735	0.816722	0.819157	0.753356	0.835477	0.83939	0.770529	0.881975	0.871202	0.86388	0.795472	0.883966	0.776044	0.7398	0.751594	0.601604	0.855558	0.788227	0.67736	0.7837	0.789425	0.817128	0.639521	0.78066
cg00956142	0.413699	0.388824	0.392092	0.455534	0.476915	0.411338	0.116688	0.310952	0.426276	0.49432	0.409568	0.471858	0.519906	0.285037	0.513742	0.792011	0.381126	0.436896	0.234414	0.327222	0.287948	0.670503	0.337923	0.467715	0.483647	0.280103	0.368623	0.678392	0.581622	0.471553	0.536585	0.766137	0.311208	0.201757	0.321319	0.382857	0.267063	0.413563	0.509636	0.462567	0.783919	0.416411	0.292085	0.627371	0.342489	0.366469	0.416315	0.762499	0.508793
cg06025827	0.442581	0.46648	0.399351	0.492256	0.510643	0.464869	0.265588	0.466181	0.477721	0.520876	0.450382	0.502424	0.483846	0.444697	0.456221	0.728802	0.529892	0.516858	0.402007	0.399659	0.434702	0.686487	0.50858	0.517663	0.504931	0.368489	0.455896	0.550761	0.500785	0.407546	0.562627	0.609137	0.469424	0.404127	0.417453	0.414973	0.414618	0.456148	0.470479	0.548507	0.685722	0.527174	0.463728	0.606542	0.389008	0.45151	0.473823	0.751655	0.445139
cg18545100	0.449001	0.392376	0.2879	0.391066	0.491065	0.464222	0.189478	0.399957	0.544529	0.506394	0.467179	0.470756	0.484735	0.430069	0.38817	0.599827	0.500004	0.530257	0.276815	0.378572	0.38802	0.639767	0.43938	0.4853	0.443839	0.325931	0.519614	0.391723	0.502322	0.489588	0.4213	0.522745	0.509807	0.354051	0.440514	0.507757	0.331487	0.517981	0.593507	0.45176	0.651715	0.498376	0.372927	0.597855	0.381065	0.452543	0.427281	0.608937	0.454992
cg13955347	0.655809	0.747404	0.826974	0.705856	0.571593	0.686108	0.874763	0.709683	0.651609	0.636652	0.746127	0.691933	0.780512	0.69768	0.694137	0.382939	0.776866	0.557144	0.869203	0.734288	0.757964	0.490892	0.608212	0.659826	0.659485	0.844476	0.630301	0.680472	0.614165	0.679256	0.796413	0.590155	0.649351	0.797399	0.725201	0.763249	0.813226	0.67292	0.563124	0.636373	0.428391	0.616683	0.589972	0.525663	0.773006	0.679879	0.657974	0.54069	0.678095
cg00242341	0.506051	0.451722	0.359104	0.521213	0.522028	0.571593	0.208333	0.416564	0.557415	0.554689	0.53492	0.526204	0.551183	0.47743	0.524273	0.757285	0.475472	0.637271	0.33132	0.422562	0.444458	0.707903	0.413918	0.518952	0.509239	0.400249	0.500754	0.399863	0.593437	0.511332	0.509594	0.529687	0.495061	0.375078	0.502781	0.491039	0.367631	0.504478	0.522321	0.527512	0.728712	0.545722	0.500112	0.658906	0.423486	0.523307	0.51405	0.688271	0.582559
cg20046808	0.59029	0.535811	0.446089	0.590479	0.623554	0.631384	0.258064	0.466282	0.705486	0.669791	0.567091	0.610649	0.611293	0.529691	0.688987	0.7865	0.597889	0.742797	0.472555	0.536849	0.466488	0.757149	0.529871	0.59894	0.571349	0.543409	0.574229	0.592352	0.664092	0.632576	0.515222	0.721406	0.543336	0.468488	0.531118	0.571788	0.426892	0.636798	0.654626	0.6578	0.788181	0.568567	0.607148	0.729236	0.478562	0.603103	0.651745	0.741358	0.627544
cg05065948	0.610136	0.53344	0.449457	0.576817	0.643866	0.630518	0.276603	0.574165	0.646503	0.648301	0.593649	0.580527	0.65272	0.575135	0.587096	0.765723	0.628486	0.685975	0.485413	0.542735	0.521276	0.841325	0.49892	0.644115	0.588701	0.459673	0.617605	0.513969	0.685377	0.564193	0.525144	0.654986	0.624375	0.501378	0.556139	0.595216	0.479604	0.603902	0.687199	0.639278	0.773952	0.568031	0.61493	0.727566	0.503353	0.657544	0.612703	0.725014	0.656491
cg12011397	0.468979	0.476699	0.360728	0.489831	0.553691	0.562266	0.176411	0.469513	0.580592	0.538967	0.449532	0.569509	0.518567	0.45942	0.434301	0.732763	0.501786	0.622255	0.304228	0.39526	0.442024	0.750679	0.368401	0.507927	0.438476	0.492039	0.533317	0.360061	0.556012	0.490044	0.406648	0.532127	0.530486	0.359167	0.462232	0.487942	0.314705	0.498775	0.513521	0.520634	0.723086	0.560743	0.390681	0.633308	0.413243	0.532517	0.479351	0.655337	0.517904
cg25230907	0.212145	0.260261	0.299314	0.273011	0.306454	0.245005	0.188622	0.13592	0.2237	0.187422	0.177177	0.222748	0.243814	0.187098	0.255792	0.258274	0.160594	0.183717	0.163116	0.218554	0.223523	0.235342	0.231963	0.220791	0.206808	0.294615	0.187454	0.768426	0.220986	0.18974	0.219952	0.797305	0.202566	0.145966	0.159508	0.151301	0.142927	0.276035	0.319093	0.180841	0.76289	0.129966	0.184915	0.416934	0.194576	0.168666	0.240134	0.686987	0.218258
cg14732445	0.638098	0.743693	0.770055	0.664954	0.681135	0.648767	0.85095	0.707933	0.610566	0.68672	0.749138	0.660726	0.751959	0.663856	0.704776	0.515986	0.754693	0.602365	0.777859	0.71818	0.711913	0.499352	0.601557	0.663965	0.707981	0.796108	0.65412	0.720633	0.664202	0.676584	0.686807	0.699206	0.631494	0.756399	0.744761	0.70533	0.771801	0.6731	0.677616	0.627431	0.485975	0.659144	0.632728	0.560613	0.730282	0.669013	0.712969	0.575272	0.678886
cg16762030	0.502111	0.464919	0.326455	0.559392	0.587015	0.562545	0.209444	0.445054	0.600852	0.568012	0.514172	0.555336	0.516449	0.428832	0.564293	0.780124	0.582143	0.671248	0.319411	0.45141	0.470019	0.762816	0.470461	0.534745	0.509009	0.472739	0.496335	0.41897	0.641284	0.556905	0.432273	0.551511	0.544176	0.376167	0.49944	0.478332	0.318607	0.485807	0.50972	0.53226	0.80627	0.522645	0.476219	0.69	0.448554	0.514187	0.509106	0.693493	0.583715
cg14251370	0.416727	0.348717	0.303583	0.466429	0.445307	0.468305	0.111719	0.30893	0.47617	0.503887	0.398709	0.397369	0.515035	0.3947	0.477082	0.545479	0.478353	0.497481	0.367636	0.299482	0.335377	0.623555	0.194662	0.465358	0.295592	0.34711	0.420265	0.288794	0.568804	0.46626	0.324526	0.534406	0.409633	0.339064	0.302464	0.36692	0.237193	0.37159	0.418135	0.408962	0.742508	0.447681	0.336069	0.579755	0.394491	0.37247	0.353292	0.585494	0.439294
cg07285490	0.363885	0.249789	0.255202	0.340533	0.353817	0.42466	0.16855	0.326246	0.411865	0.288591	0.27676	0.35632	0.385351	0.276975	0.402747	0.426169	0.401399	0.462474	0.257966	0.29742	0.279683	0.383295	0.306468	0.358086	0.278261	0.341085	0.368209	0.430015	0.38334	0.313783	0.281404	0.489331	0.244133	0.263616	0.287075	0.296604	0.22139	0.290603	0.38225	0.357365	0.619677	0.268519	0.28555	0.539508	0.318141	0.300958	0.406717	0.602281	0.388465
cg08329351	0.523585	0.461589	0.407135	0.52821	0.533775	0.596297	0.168556	0.428164	0.659043	0.576609	0.484469	0.566615	0.528926	0.481566	0.57293	0.748259	0.51312	0.645544	0.400633	0.449168	0.438604	0.784549	0.563316	0.553114	0.493185	0.366914	0.604533	0.445765	0.597506	0.534807	0.462345	0.540356	0.526658	0.413512	0.42958	0.479609	0.36465	0.519588	0.484902	0.56018	0.757366	0.539214	0.513289	0.697854	0.446079	0.54563	0.537821	0.720865	0.539402
cg14467744	0.516122	0.598241	0.572029	0.52264	0.560542	0.512169	0.62193	0.565592	0.511574	0.552379	0.573565	0.476375	0.499354	0.547419	0.540666	0.439845	0.593761	0.43089	0.611401	0.615813	0.486776	0.368926	0.541132	0.490635	0.582324	0.62829	0.511974	0.525072	0.479414	0.425457	0.558618	0.475689	0.559512	0.578803	0.552982	0.568155	0.612814	0.519857	0.465747	0.464286	0.343426	0.51129	0.507066	0.391533	0.558676	0.543711	0.560229	0.405098	0.521943
cg10168494	0.368879	0.27661	0.227264	0.365335	0.332902	0.437747	0.110952	0.269092	0.430957	0.317279	0.302643	0.399658	0.390413	0.370628	0.370313	0.437468	0.456958	0.433576	0.223029	0.265427	0.319301	0.466036	0.386711	0.404535	0.345795	0.23806	0.444918	0.323697	0.389997	0.360482	0.31727	0.395435	0.390993	0.245348	0.342243	0.358089	0.236341	0.385821	0.322197	0.370918	0.620518	0.339154	0.345895	0.555754	0.315975	0.366553	0.378669	0.579768	0.373597
cg26359045	0.541316	0.485795	0.486394	0.564834	0.562889	0.59949	0.312799	0.513679	0.57616	0.584865	0.489857	0.511633	0.527737	0.516081	0.578781	0.732603	0.601152	0.534405	0.399082	0.496496	0.461894	0.616252	0.485663	0.561138	0.545282	0.447049	0.541518	0.567952	0.586932	0.529124	0.519262	0.699046	0.545967	0.467546	0.52896	0.495687	0.395068	0.542086	0.489023	0.567522	0.757045	0.563987	0.542702	0.678042	0.461543	0.56822	0.542524	0.757315	0.500866
cg21703823	0.568845	0.524058	0.439883	0.558042	0.634807	0.579188	0.310786	0.426405	0.627382	0.666126	0.592708	0.5857	0.623958	0.566228	0.649475	0.76919	0.643579	0.694259	0.385496	0.506417	0.52198	0.812673	0.512046	0.605973	0.565127	0.490674	0.571513	0.46628	0.701959	0.619135	0.507375	0.64561	0.648213	0.434848	0.516651	0.517498	0.470616	0.585334	0.666219	0.63229	0.834315	0.498783	0.544867	0.73955	0.534669	0.656558	0.640153	0.764608	0.582771
cg21178389	0.192078	0.143813	0.156768	0.171876	0.18999	0.255393	0.0689584	0.0371034	0.216942	0.207899	0.13017	0.240256	0.272572	0.137849	0.0933684	0.140274	0.20597	0.22918	0.136148	0.139995	0.096393	0.209691	0.0986833	0.0404037	0.163544	0.205861	0.196622	0.189352	0.191818	0.146457	0.136217	0.238942	0.124124	0.147014	0.0524442	0.20239	0.0630474	0.185016	0.154847	0.12786	0.455111	0.11162	0.151668	0.264531	0.205145	0.148146	0.242697	0.408179	0.160552
cg16347927	0.836757	0.880789	0.851319	0.829227	0.840055	0.811004	0.927029	0.889472	0.873422	0.841593	0.884187	0.762449	0.844554	0.845482	0.807538	0.743927	0.854858	0.816544	0.853638	0.87198	0.912712	0.681312	0.854415	0.867096	0.851277	0.888668	0.838179	0.743972	0.821461	0.863937	0.841124	0.689286	0.929228	0.846067	0.92119	0.838614	0.938149	0.875913	0.822205	0.751039	0.597879	0.866277	0.83426	0.713384	0.886215	0.862699	0.809094	0.676013	0.798785
cg08429353	0.47978	0.415352	0.300821	0.489216	0.532758	0.543691	0.124078	0.425019	0.561514	0.524273	0.460778	0.521074	0.544617	0.415067	0.539423	0.756659	0.528597	0.592628	0.279343	0.374234	0.41322	0.767648	0.447379	0.523004	0.456921	0.480928	0.541076	0.404682	0.550899	0.508312	0.391016	0.54056	0.551566	0.347123	0.451538	0.492234	0.292267	0.492354	0.535784	0.546998	0.770731	0.530341	0.426655	0.646133	0.41193	0.473867	0.437451	0.639656	0.495349
cg23302181	0.517332	0.521552	0.507385	0.572599	0.580811	0.605077	0.299103	0.412925	0.570104	0.628035	0.560365	0.549151	0.563601	0.425522	0.516317	0.896369	0.464106	0.576192	0.402618	0.38979	0.479004	0.748909	0.449408	0.551499	0.53076	0.528338	0.41474	0.851453	0.595117	0.563509	0.484912	0.925366	0.553045	0.396422	0.445472	0.475773	0.410623	0.539268	0.53329	0.478177	0.88391	0.52258	0.460527	0.759817	0.428374	0.460095	0.485858	0.9117	0.491891
cg24013213	0.361917	0.319789	0.303865	0.40474	0.372384	0.46562	0.142707	0.305906	0.413281	0.423764	0.324684	0.377785	0.404702	0.323296	0.347688	0.543249	0.351039	0.310199	0.227665	0.308738	0.288291	0.505695	0.270723	0.399893	0.437211	0.18925	0.288021	0.519821	0.455046	0.397918	0.324776	0.645956	0.400203	0.268055	0.329343	0.324444	0.197243	0.316927	0.284945	0.377633	0.685423	0.315227	0.330801	0.508371	0.235316	0.360001	0.346539	0.70867	0.359111
cg13699412	0.592512	0.507279	0.415673	0.573865	0.676033	0.618302	0.258155	0.500678	0.697403	0.623263	0.529972	0.60366	0.631983	0.539733	0.610365	0.837587	0.613574	0.67578	0.362546	0.505845	0.485908	0.850552	0.505149	0.656304	0.579302	0.371293	0.58543	0.490886	0.696026	0.578965	0.43396	0.629487	0.66015	0.487542	0.564371	0.60904	0.402554	0.617805	0.55921	0.55924	0.81461	0.591248	0.606888	0.762752	0.442928	0.658129	0.585613	0.812	0.578218
cg23985422	0.550192	0.475243	0.455079	0.556573	0.607558	0.527245	0.316232	0.49896	0.668358	0.587708	0.566312	0.570431	0.589596	0.524259	0.583769	0.637596	0.64383	0.586216	0.456066	0.499305	0.42918	0.6358	0.534696	0.52616	0.536131	0.501856	0.606319	0.543409	0.632228	0.570605	0.557819	0.640209	0.465312	0.422172	0.556227	0.503224	0.490998	0.55986	0.583128	0.614107	0.738634	0.529963	0.566539	0.690158	0.540954	0.529522	0.594622	0.711586	0.603045
cg02176715	0.599146	0.427187	0.418963	0.558082	0.578471	0.625457	0.136332	0.407748	0.703038	0.600972	0.499535	0.556048	0.574437	0.427982	0.563463	0.639126	0.645654	0.606224	0.391861	0.608999	0.402532	0.673989	0.553621	0.569445	0.476365	0.47754	0.534107	0.490112	0.605628	0.54845	0.494887	0.665635	0.558416	0.417557	0.542702	0.510908	0.377999	0.456074	0.659041	0.592662	0.789655	0.456199	0.597381	0.729685	0.46005	0.569837	0.678108	0.79259	0.472088
cg02421646	0.634588	0.699992	0.703116	0.680667	0.779889	0.745794	0.573597	0.5089	0.775312	0.799433	0.673854	0.695114	0.749564	0.581714	0.796795	0.826352	0.717872	0.732213	0.7011	0.652267	0.470395	0.68444	0.64853	0.641561	0.728671	0.772682	0.609884	0.918567	0.738149	0.676507	0.729199	0.882741	0.526701	0.560566	0.615433	0.537862	0.536709	0.698287	0.710551	0.773855	0.918032	0.57046	0.746701	0.865176	0.571283	0.690742	0.804382	0.911542	0.745607
cg14251509	0.328271	0.262309	0.262415	0.285377	0.331398	0.342125	0.121059	0.195799	0.330646	0.429186	0.339372	0.357523	0.30083	0.19046	0.462594	0.467276	0.332736	0.213261	0.395462	0.295777	0.123698	0.360153	0.322034	0.232424	0.395752	0.284153	0.280857	0.487354	0.376143	0.285686	0.416694	0.568284	0.170541	0.190355	0.236003	0.256097	0.227012	0.294742	0.409985	0.343249	0.661272	0.177377	0.214353	0.398884	0.408333	0.278213	0.207668	0.601833	0.285465
cg14140920	0.395982	0.24549	0.27139	0.371565	0.401548	0.408437	0.120824	0.230857	0.382777	0.393562	0.330393	0.338214	0.336699	0.277853	0.388593	0.514116	0.382163	0.443907	0.160919	0.223787	0.333654	0.52667	0.272202	0.381451	0.32046	0.217832	0.318302	0.273676	0.402735	0.331298	0.306004	0.410018	0.373354	0.266346	0.305196	0.295484	0.208746	0.288463	0.290044	0.390701	0.617914	0.33066	0.280431	0.49138	0.247163	0.302863	0.322139	0.582701	0.325767
cg26429069	0.131643	0.105077	0.0949893	0.14716	0.161735	0.158989	0.0508714	0.119849	0.144112	0.140316	0.0950392	0.145807	0.127061	0.120105	0.170796	0.0999068	0.127405	0.206044	0.0893074	0.129742	0.0853068	0.207023	0.11653	0.182192	0.153899	0.0823186	0.138439	0.205468	0.190586	0.120824	0.126003	0.248257	0.0828387	0.0868801	0.0963937	0.0935	0.062012	0.119268	0.146566	0.158264	0.348537	0.116814	0.110047	0.238142	0.106464	0.132333	0.127178	0.271197	0.171868
cg23230830	0.386953	0.309954	0.241398	0.380371	0.430214	0.438431	0.0912645	0.311263	0.486229	0.415494	0.319555	0.411875	0.431335	0.3399	0.383985	0.536648	0.478885	0.510491	0.200643	0.285235	0.294965	0.650403	0.249247	0.441706	0.33869	0.259689	0.414082	0.297427	0.476378	0.389543	0.298451	0.426561	0.394448	0.25198	0.332601	0.402469	0.206834	0.354771	0.377674	0.395235	0.628396	0.407835	0.344273	0.534339	0.28199	0.385631	0.356026	0.598001	0.388835
cg19671293	0.73179	0.702383	0.70012	0.737694	0.791068	0.778308	0.559035	0.610616	0.783781	0.790299	0.711712	0.795795	0.822702	0.618969	0.812864	0.907345	0.680257	0.762842	0.604421	0.678936	0.606314	0.790126	0.620693	0.682797	0.73697	0.871774	0.631726	0.93473	0.829284	0.769188	0.783534	0.923259	0.677112	0.595146	0.594731	0.642813	0.599466	0.684236	0.763631	0.759451	0.921389	0.768771	0.646784	0.889333	0.678239	0.6936	0.665247	0.944193	0.747127
cg21892295	0.24387	0.459626	0.332282	0.419631	0.391565	0.389771	0.238437	0.222002	0.399492	0.334704	0.347301	0.277593	0.391471	0.335764	0.379798	0.507631	0.465763	0.495883	0.132651	0.306532	0.38289	0.514721	0.346406	0.416429	0.402288	0.292455	0.367367	0.437627	0.480225	0.261241	0.432146	0.490327	0.520931	0.184769	0.385623	0.308838	0.280406	0.378568	0.39597	0.328001	0.671859	0.302541	0.45065	0.451105	0.321038	0.387531	0.401433	0.584541	0.370381
cg00075967	0.824279	0.802017	0.750249	0.813265	0.80796	0.778463	0.845082	0.837011	0.793418	0.776561	0.824287	0.796051	0.794707	0.814539	0.749051	0.5915	0.770261	0.836588	0.895852	0.832962	0.767449	0.671009	0.840062	0.766655	0.876312	0.796799	0.854773	0.66917	0.778911	0.770622	0.881576	0.592746	0.822688	0.849708	0.808575	0.772816	0.838049	0.805599	0.77099	0.767194	0.458179	0.7627	0.737022	0.656043	0.831654	0.775063	0.807842	0.583636	0.819757
cg01833991	0.501665	0.463478	0.426577	0.48516	0.535507	0.53703	0.339234	0.449503	0.56663	0.549843	0.522219	0.541128	0.471374	0.497455	0.594933	0.607173	0.510622	0.59881	0.514841	0.475531	0.36842	0.621892	0.495446	0.529752	0.488185	0.518195	0.517246	0.500036	0.531972	0.568748	0.558881	0.574778	0.432273	0.436676	0.44278	0.455247	0.420002	0.51911	0.550829	0.548441	0.710932	0.487629	0.469342	0.64146	0.515698	0.597814	0.542082	0.667258	0.547362
cg01353265	0.643081	0.607136	0.531925	0.692583	0.62923	0.704162	0.43505	0.604604	0.606501	0.621431	0.576202	0.606494	0.640067	0.582233	0.648014	0.754429	0.644902	0.66425	0.495794	0.62052	0.562434	0.716529	0.574694	0.602237	0.71051	0.572193	0.52375	0.831593	0.659654	0.575386	0.504656	0.882378	0.658472	0.553339	0.641591	0.593821	0.551697	0.618944	0.697102	0.598135	0.929726	0.541952	0.635281	0.78399	0.533713	0.733679	0.596262	0.908752	0.516293
cg16622602	0.139513	0.109727	0.105066	0.137418	0.18479	0.149398	0.035002	0.0621889	0.202939	0.130614	0.126432	0.22839	0.237782	0.112231	0.162986	0.361938	0.189025	0.22487	0.0587726	0.0783974	0.0401119	0.26869	0.141753	0.170848	0.095796	0.130604	0.105125	0.144739	0.219489	0.138318	0.169412	0.239034	0.112523	0.0396235	0.0726437	0.0979546	0.0582628	0.168132	0.171962	0.225447	0.384774	0.103602	0.0928319	0.262361	0.129481	0.121721	0.133626	0.329016	0.164259
cg25390755	0.520443	0.413702	0.444221	0.460726	0.515009	0.549584	0.32512	0.430803	0.546412	0.485305	0.484775	0.553488	0.606028	0.469488	0.548776	0.535046	0.484626	0.516195	0.466248	0.484525	0.450371	0.543335	0.537774	0.473886	0.491527	0.579391	0.526132	0.535029	0.57542	0.494238	0.517388	0.660758	0.397581	0.466289	0.459433	0.505362	0.444302	0.528374	0.520932	0.493792	0.643154	0.477607	0.489426	0.614243	0.441132	0.545676	0.503815	0.728695	0.561707
cg15297642	0.504567	0.614963	0.554987	0.539104	0.514469	0.507457	0.588649	0.549547	0.523223	0.590619	0.602749	0.566199	0.543263	0.579512	0.525977	0.3404	0.517381	0.561487	0.540556	0.5608	0.604166	0.365403	0.500303	0.43281	0.561286	0.592218	0.537665	0.47968	0.508802	0.477816	0.577989	0.400012	0.635281	0.58042	0.538619	0.586281	0.660398	0.563992	0.506495	0.492355	0.348778	0.522377	0.446922	0.405214	0.441422	0.568607	0.566406	0.422262	0.48575
cg24999217	0.371976	0.325013	0.252168	0.40991	0.401153	0.408511	0.119583	0.333285	0.447367	0.416442	0.365427	0.429136	0.399038	0.346867	0.431288	0.52022	0.391361	0.491171	0.237328	0.280409	0.34562	0.564809	0.295248	0.423608	0.328369	0.398754	0.410785	0.321325	0.45036	0.401267	0.32779	0.405322	0.373974	0.273802	0.33636	0.371239	0.255236	0.340861	0.382288	0.413055	0.581485	0.40485	0.365197	0.524665	0.300358	0.353853	0.363168	0.541434	0.39121
cg09012560	0.678615	0.758757	0.797181	0.629736	0.655053	0.677682	0.869645	0.671459	0.655681	0.726207	0.739989	0.685982	0.742086	0.740999	0.697936	0.483769	0.693988	0.608647	0.84513	0.822716	0.703796	0.496035	0.686753	0.66967	0.744285	0.68949	0.658192	0.748047	0.629642	0.711743	0.79106	0.616673	0.66948	0.829474	0.799115	0.758985	0.823293	0.764665	0.719047	0.688298	0.469672	0.61597	0.644551	0.551512	0.767408	0.665141	0.711588	0.556512	0.682843
cg08285289	0.443282	0.328792	0.428642	0.393817	0.414909	0.280542	0.34044	0.308081	0.414637	0.401105	0.414537	0.269268	0.546594	0.272388	0.272637	0.352028	0.533206	0.261968	0.260375	0.453021	0.282794	0.390401	0.179134	0.367007	0.37322	0.506749	0.301458	0.613327	0.484475	0.414473	0.41611	0.626011	0.434167	0.322559	0.408926	0.374733	0.38556	0.451524	0.450537	0.314766	0.583876	0.320829	0.313061	0.473551	0.599431	0.362536	0.167477	0.623922	0.407658
cg06876053	0.336669	0.172055	0.216683	0.30445	0.2538	0.263836	0.0868097	0.231808	0.282872	0.243392	0.236818	0.326844	0.257858	0.242917	0.333074	0.379888	0.302699	0.356949	0.191485	0.199271	0.286121	0.399758	0.236524	0.278022	0.284953	0.27429	0.293177	0.302327	0.399973	0.289033	0.234663	0.456303	0.27053	0.215709	0.254248	0.277307	0.185166	0.241384	0.315967	0.329872	0.516664	0.253409	0.257163	0.398503	0.177118	0.292142	0.380158	0.427617	0.237224
cg04998590	0.650992	0.440517	0.390729	0.517668	0.640581	0.587683	0.26629	0.506388	0.649349	0.618608	0.536332	0.553119	0.553463	0.531878	0.534191	0.90441	0.541201	0.62285	0.378448	0.528567	0.472015	0.7455	0.612583	0.731469	0.533835	0.438403	0.561033	0.453643	0.633145	0.562224	0.482504	0.56677	0.601323	0.437234	0.53391	0.557944	0.381001	0.608332	0.676292	0.58492	0.776897	0.57257	0.543063	0.712266	0.440277	0.726687	0.565964	0.810422	0.571298
cg03119750	0.842346	0.933549	0.924201	0.847917	0.896086	0.817277	0.936702	0.914557	0.827489	0.88466	0.916807	0.822014	0.814102	0.889147	0.784338	0.723812	0.875845	0.787584	0.907221	0.903537	0.912758	0.775814	0.894786	0.833156	0.874149	0.94703	0.829467	0.798614	0.818871	0.849642	0.902534	0.762893	0.942843	0.917549	0.904472	0.906468	0.938748	0.914354	0.823482	0.803908	0.60988	0.895422	0.822133	0.710636	0.850523	0.855718	0.81716	0.67382	0.820296
cg01041449	0.542183	0.509221	0.456299	0.566523	0.584203	0.630891	0.361989	0.506056	0.606436	0.530355	0.541138	0.562217	0.670101	0.523794	0.625399	0.771256	0.576689	0.576856	0.395607	0.419046	0.590985	0.598819	0.479459	0.553146	0.531751	0.514775	0.592251	0.602167	0.575839	0.624216	0.53108	0.741995	0.567349	0.446203	0.472631	0.535936	0.464812	0.51888	0.506894	0.559758	0.70852	0.57559	0.528214	0.675364	0.460215	0.576678	0.611878	0.743625	0.538642
cg18731680	0.42677	0.35726	0.301155	0.46348	0.439283	0.48211	0.165484	0.322587	0.451941	0.428812	0.402558	0.461291	0.416819	0.379144	0.428013	0.655678	0.443571	0.514773	0.296583	0.344707	0.359305	0.656048	0.45826	0.499205	0.426105	0.240939	0.480571	0.390985	0.43379	0.286104	0.3928	0.493627	0.429622	0.295196	0.394201	0.404998	0.300491	0.392663	0.398191	0.468446	0.644438	0.421579	0.416928	0.537024	0.314015	0.428688	0.445994	0.584348	0.428461
cg14682629	0.333251	0.283168	0.209923	0.340387	0.374089	0.399766	0.113739	0.296944	0.371857	0.355811	0.334462	0.324548	0.335325	0.294367	0.35416	0.502403	0.38899	0.421598	0.199413	0.241996	0.320837	0.502917	0.275464	0.41485	0.354184	0.167321	0.351658	0.275623	0.421584	0.387826	0.287904	0.38511	0.374587	0.265512	0.336519	0.360778	0.229234	0.320649	0.339069	0.3689	0.570062	0.347913	0.303531	0.483336	0.26172	0.350015	0.309297	0.461287	0.346567
cg13709496	0.432187	0.366755	0.27797	0.450584	0.465784	0.47112	0.181307	0.404384	0.504634	0.458895	0.418674	0.424959	0.453573	0.397722	0.446174	0.599745	0.406971	0.515359	0.295871	0.355817	0.380551	0.588031	0.366292	0.488121	0.450033	0.296551	0.465341	0.381655	0.529094	0.488343	0.38152	0.459462	0.476235	0.328182	0.391819	0.426322	0.281249	0.416088	0.431182	0.448147	0.638133	0.45971	0.374382	0.535039	0.353822	0.466632	0.39619	0.568133	0.452892
cg25232236	0.303744	0.190923	0.257637	0.271477	0.275845	0.376172	0.149063	0.216395	0.291626	0.277435	0.23449	0.354111	0.348265	0.287919	0.336781	0.269958	0.318204	0.370254	0.26566	0.196404	0.183732	0.289234	0.277631	0.324308	0.298371	0.199598	0.357657	0.270349	0.303194	0.305332	0.351425	0.370535	0.248011	0.242171	0.220283	0.224033	0.164996	0.255496	0.254829	0.333119	0.485729	0.237034	0.193305	0.411332	0.309621	0.300147	0.284781	0.46672	0.322583
cg00440980	0.714352	0.85275	0.838048	0.73671	0.74278	0.713174	0.913652	0.864289	0.760786	0.757668	0.833249	0.743688	0.780821	0.808584	0.711923	0.638696	0.819524	0.749023	0.873549	0.804077	0.73582	0.610005	0.756351	0.805587	0.782891	0.825064	0.753974	0.750975	0.746285	0.791997	0.833762	0.663097	0.776714	0.817512	0.802357	0.812144	0.853723	0.821795	0.803438	0.772231	0.553277	0.717681	0.691437	0.624174	0.830465	0.72947	0.759839	0.612217	0.808908
cg03676956	0.324978	0.245411	0.228049	0.281232	0.363853	0.392552	0.127932	0.249394	0.360032	0.328862	0.311697	0.341728	0.410959	0.262441	0.331229	0.57073	0.330991	0.361608	0.172568	0.203225	0.256795	0.428922	0.285719	0.307703	0.32875	0.237661	0.28592	0.379155	0.312528	0.32588	0.36388	0.406136	0.334245	0.224181	0.246656	0.258618	0.203175	0.275379	0.335893	0.348859	0.545638	0.293962	0.273799	0.438151	0.319478	0.32887	0.29233	0.52444	0.28907
cg13769596	0.413626	0.247879	0.208939	0.374133	0.423976	0.413578	0.123563	0.260331	0.451143	0.3894	0.342817	0.423623	0.418527	0.327587	0.433182	0.482114	0.401752	0.449472	0.257819	0.318578	0.305848	0.521331	0.423161	0.432167	0.362722	0.375612	0.439843	0.367756	0.463092	0.421543	0.370936	0.422195	0.304343	0.282855	0.312361	0.33512	0.246174	0.385122	0.465905	0.414259	0.649308	0.337189	0.355669	0.544559	0.329956	0.360064	0.377406	0.58868	0.418944
cg13387131	0.519403	0.436844	0.330511	0.537778	0.546151	0.596936	0.216129	0.417147	0.575446	0.529777	0.478806	0.566897	0.545971	0.440402	0.594713	0.6818	0.578272	0.620074	0.329437	0.442528	0.398731	0.693992	0.477992	0.54624	0.438444	0.505948	0.513589	0.478916	0.607961	0.508598	0.488277	0.576448	0.432717	0.378623	0.444742	0.538922	0.35353	0.504969	0.543226	0.546345	0.810968	0.449002	0.46295	0.674107	0.367705	0.561449	0.513019	0.764429	0.535916
cg12806049	0.487291	0.463465	0.462443	0.502772	0.523572	0.543277	0.356992	0.428527	0.540303	0.498669	0.52409	0.535006	0.502879	0.471643	0.574329	0.548664	0.519986	0.552444	0.490414	0.470833	0.420401	0.52588	0.514152	0.467714	0.494794	0.508719	0.525584	0.585709	0.535163	0.50255	0.445764	0.717783	0.423596	0.471775	0.430029	0.488165	0.392382	0.497115	0.508901	0.552675	0.761477	0.463557	0.503536	0.681415	0.479493	0.484739	0.542099	0.76223	0.495872
cg21595481	0.199964	0.191911	0.162148	0.218396	0.2901	0.211571	0.0461528	0.100579	0.275042	0.257334	0.166552	0.260577	0.238888	0.154891	0.229155	0.293753	0.221799	0.432854	0.0979566	0.0740679	0.109253	0.372914	0.140254	0.209869	0.0450547	0.311371	0.244006	0.149308	0.265021	0.171834	0.144052	0.363048	0.0978592	0.105749	0.0824706	0.203227	0.050674	0.222414	0.220647	0.22269	0.609485	0.11221	0.135063	0.393552	0.143581	0.248322	0.229548	0.544833	0.31317
cg03237699	0.462135	0.396969	0.296627	0.481454	0.479151	0.534899	0.179995	0.433942	0.532369	0.516667	0.462701	0.459996	0.518815	0.415167	0.432252	0.610491	0.51779	0.559856	0.299399	0.371774	0.415443	0.677008	0.424213	0.513403	0.405535	0.434872	0.495128	0.400857	0.575058	0.51318	0.42503	0.494555	0.498797	0.350869	0.419679	0.491035	0.32786	0.448044	0.472214	0.504719	0.698679	0.500465	0.407544	0.651616	0.401064	0.478159	0.466056	0.586682	0.479594
cg14850568	0.630879	0.538269	0.426863	0.593666	0.655671	0.645795	0.414783	0.523604	0.65793	0.610652	0.572178	0.600176	0.661762	0.582506	0.693442	0.678705	0.634206	0.753737	0.492833	0.578322	0.503253	0.753994	0.571328	0.635405	0.64669	0.461085	0.632544	0.629956	0.625822	0.677222	0.605347	0.776749	0.573097	0.538397	0.588568	0.623554	0.484647	0.628667	0.740356	0.645064	0.850203	0.555701	0.637913	0.763693	0.586815	0.643322	0.567141	0.713099	0.703556
cg18660898	0.236868	0.119425	0.155581	0.163226	0.221341	0.230643	0.0630175	0.0864114	0.244627	0.198669	0.162505	0.257488	0.272485	0.149356	0.271274	0.211844	0.202096	0.236698	0.186786	0.111064	0.0696186	0.201185	0.141068	0.206243	0.219035	0.167963	0.176096	0.311827	0.310173	0.198274	0.238069	0.358044	0.101365	0.0907162	0.114982	0.150378	0.103482	0.21937	0.230618	0.302674	0.451705	0.108003	0.138151	0.331918	0.18935	0.148073	0.206502	0.504267	0.198573
cg08789978	0.54532	0.39255	0.389951	0.510669	0.4724	0.546734	0.167639	0.376035	0.628203	0.57623	0.44104	0.456848	0.52662	0.460584	0.590426	0.657703	0.536765	0.572575	0.411444	0.50551	0.394231	0.713305	0.491672	0.538555	0.585084	0.377908	0.570615	0.509453	0.551956	0.661827	0.437824	0.700341	0.481003	0.313774	0.51941	0.351397	0.333068	0.534979	0.613086	0.564373	0.762535	0.513334	0.505447	0.680385	0.372954	0.626304	0.477946	0.671111	0.612976
cg01097408	0.416734	0.43271	0.342784	0.499957	0.515383	0.470037	0.218243	0.373078	0.479786	0.548971	0.422555	0.484567	0.496903	0.387714	0.506445	0.402141	0.451021	0.51739	0.348237	0.32834	0.382321	0.640106	0.403553	0.437732	0.496009	0.420087	0.354495	0.729796	0.550467	0.494085	0.467452	0.769746	0.434588	0.38132	0.420908	0.401293	0.324191	0.452716	0.511351	0.503022	0.787766	0.419949	0.35338	0.636255	0.386078	0.456328	0.38644	0.774036	0.472047
cg17797863	0.442728	0.454379	0.387896	0.481804	0.508422	0.535102	0.251654	0.430956	0.52812	0.518039	0.502442	0.505865	0.44738	0.420836	0.456243	0.634154	0.365775	0.585517	0.370609	0.410594	0.39365	0.54199	0.422166	0.469357	0.464034	0.484192	0.482784	0.471418	0.543509	0.482176	0.456325	0.619075	0.468511	0.363485	0.425295	0.437354	0.357931	0.43139	0.455346	0.517818	0.677841	0.494263	0.409604	0.592216	0.399196	0.467145	0.453135	0.671372	0.518524
cg21837069	0.129046	0.142389	0.148141	0.181185	0.152659	0.222132	0.083768	0.102605	0.160195	0.164957	0.131728	0.163558	0.168262	0.149192	0.16546	0.301319	0.120059	0.169987	0.057919	0.0866737	0.0713099	0.204859	0.109977	0.126827	0.111214	0.164724	0.101154	0.319488	0.108208	0.229279	0.0986393	0.346766	0.105015	0.0945538	0.107948	0.0637109	0.0590321	0.131803	0.168172	0.192538	0.447351	0.0880422	0.117385	0.247879	0.11314	0.157111	0.15427	0.448293	0.142222
cg04856678	0.329181	0.195229	0.18522	0.277135	0.308141	0.344757	0.0990684	0.237338	0.332164	0.305791	0.257604	0.313635	0.318533	0.277625	0.362527	0.382594	0.347313	0.381847	0.216048	0.245508	0.196702	0.368543	0.313898	0.349064	0.276678	0.219932	0.347966	0.317471	0.386201	0.320626	0.298235	0.41347	0.226929	0.218181	0.259046	0.249734	0.176816	0.273907	0.332076	0.337007	0.530549	0.24584	0.265029	0.436784	0.246224	0.251665	0.298053	0.486148	0.344345
cg08356841	0.542536	0.493189	0.382202	0.548335	0.592083	0.605863	0.317094	0.478896	0.635241	0.596314	0.560228	0.536618	0.591133	0.479962	0.529666	0.715503	0.545475	0.663784	0.406294	0.470676	0.516596	0.775652	0.479966	0.579444	0.495217	0.528726	0.565056	0.45892	0.640768	0.591693	0.460498	0.596919	0.583155	0.444526	0.481001	0.536377	0.369242	0.539766	0.542445	0.563685	0.750795	0.516311	0.508108	0.697336	0.478964	0.574542	0.581645	0.720983	0.584166
cg09169413	0.38314	0.364405	0.335785	0.433353	0.406381	0.462969	0.241887	0.328177	0.427834	0.380056	0.385018	0.467353	0.3487	0.332473	0.415654	0.651915	0.347645	0.484496	0.245047	0.294557	0.378703	0.509783	0.333599	0.488651	0.44477	0.151128	0.379887	0.396902	0.452715	0.408027	0.378227	0.46569	0.463152	0.303121	0.392708	0.364588	0.228259	0.311994	0.333878	0.374754	0.553794	0.411263	0.391674	0.488208	0.379339	0.363819	0.45192	0.498548	0.346645
cg04307776	0.418567	0.421524	0.476119	0.417796	0.447724	0.463953	0.444304	0.482515	0.467672	0.424395	0.454768	0.438805	0.562698	0.446824	0.441821	0.450553	0.479994	0.494527	0.431013	0.412581	0.359753	0.393841	0.350364	0.389744	0.426655	0.421098	0.438019	0.540017	0.429631	0.362764	0.467515	0.600294	0.309559	0.430712	0.439731	0.425041	0.416599	0.469991	0.442579	0.479391	0.688288	0.385332	0.423809	0.533851	0.523767	0.412954	0.511552	0.624876	0.471207
cg02388253	0.237875	0.183128	0.162579	0.221668	0.28504	0.251376	0.104279	0.142068	0.335622	0.240254	0.239407	0.286894	0.331158	0.180148	0.235212	0.285161	0.167824	0.279547	0.228975	0.179995	0.159273	0.348214	0.174322	0.202578	0.220185	0.259277	0.203858	0.303863	0.348592	0.207123	0.221805	0.367656	0.135144	0.166089	0.138633	0.195754	0.161611	0.237054	0.27038	0.296568	0.453802	0.165556	0.162371	0.341293	0.221651	0.179129	0.202034	0.406753	0.278532
cg27091631	0.66194	0.532603	0.555886	0.55488	0.65505	0.649188	0.485751	0.569778	0.681151	0.675591	0.604881	0.675533	0.687509	0.590134	0.626649	0.65037	0.611206	0.644066	0.60056	0.603706	0.549216	0.717307	0.629291	0.623997	0.613883	0.606332	0.638351	0.72676	0.711794	0.678796	0.6077	0.776736	0.579043	0.569532	0.579157	0.559232	0.541872	0.660064	0.730214	0.691882	0.86285	0.540571	0.623739	0.772958	0.597747	0.638536	0.693313	0.810259	0.661566
cg24716039	0.826063	0.925482	0.892813	0.862464	0.858176	0.838357	0.95826	0.909646	0.8423	0.893559	0.891347	0.818709	0.857551	0.864838	0.840173	0.839981	0.870276	0.76587	0.903423	0.920304	0.939278	0.803438	0.840002	0.854096	0.895662	0.937189	0.833246	0.804479	0.839877	0.869691	0.907026	0.766912	0.931804	0.916562	0.920042	0.906629	0.940636	0.936661	0.79508	0.820848	0.613746	0.913045	0.822491	0.733649	0.893952	0.896095	0.8277	0.672187	0.89762
cg25840926	0.479734	0.625234	0.488694	0.576679	0.536352	0.556431	0.647356	0.640648	0.488064	0.54647	0.567272	0.471908	0.464692	0.610293	0.479929	0.449304	0.59206	0.597187	0.532077	0.529319	0.663239	0.431607	0.462029	0.631592	0.589586	0.453829	0.494272	0.417517	0.47259	0.554911	0.483513	0.423684	0.774431	0.642574	0.611245	0.705354	0.581858	0.48428	0.467199	0.434732	0.372473	0.567642	0.468144	0.409676	0.496224	0.538511	0.587959	0.351977	0.579692
cg27119222	0.57582	0.589472	0.519477	0.562389	0.536327	0.549237	0.631736	0.581756	0.596198	0.561752	0.580608	0.56098	0.575569	0.561813	0.599507	0.654491	0.625831	0.573271	0.624521	0.626183	0.648706	0.607763	0.611954	0.53145	0.605781	0.705148	0.56588	0.565991	0.618791	0.574041	0.434452	0.513498	0.603823	0.593327	0.605455	0.559365	0.543679	0.232267	0.0797542	0.0729141	0.264065	0.044466	0.123625	0.0935962	0.0891226	0.0374502	0.0393648	0.147913	0.0282033
cg20942162	0.615159	0.603773	0.571855	0.673669	0.637907	0.680181	0.368604	0.559291	0.717616	0.672063	0.659892	0.704539	0.69181	0.592536	0.653646	0.794349	0.652424	0.708444	0.53773	0.564204	0.584822	0.752695	0.614861	0.626855	0.59623	0.713094	0.603172	0.683872	0.723864	0.671455	0.60869	0.747564	0.61444	0.581409	0.54863	0.639372	0.546764	0.594103	0.614864	0.669532	0.830414	0.588931	0.561218	0.78381	0.546962	0.65508	0.657957	0.736957	0.607949
cg23117180	0.555032	0.588058	0.562548	0.595329	0.656636	0.664053	0.40701	0.51324	0.662121	0.700218	0.574264	0.644782	0.741685	0.426585	0.695476	0.801155	0.588855	0.536124	0.485835	0.47971	0.486638	0.763926	0.458833	0.508185	0.655266	0.730932	0.414328	0.860606	0.765229	0.68088	0.626274	0.876783	0.476086	0.483549	0.472023	0.479576	0.414611	0.595923	0.634567	0.658014	0.867929	0.567328	0.556113	0.767374	0.533491	0.541967	0.563034	0.916569	0.560341
cg11232319	0.575614	0.535518	0.406167	0.517074	0.541334	0.766302	0.289052	0.482296	0.658078	0.589094	0.529233	0.635045	0.584416	0.545678	0.602324	0.714155	0.590045	0.694516	0.534903	0.492592	0.495575	0.754845	0.507321	0.603585	0.583963	0.503007	0.586573	0.559726	0.786597	0.568339	0.535923	0.688854	0.512632	0.475708	0.484915	0.578139	0.522385	0.73771	0.570494	0.636608	0.814308	0.557701	0.58859	0.716453	0.551967	0.626716	0.619675	0.73489	0.64123
cg23545556	0.45308	0.380817	0.307677	0.447458	0.490127	0.525364	0.163814	0.343007	0.523905	0.50681	0.415331	0.578475	0.492974	0.400208	0.49097	0.663357	0.428669	0.589123	0.318001	0.371374	0.380856	0.666643	0.4136	0.457901	0.406549	0.415964	0.438788	0.428116	0.581001	0.460796	0.507947	0.570776	0.389619	0.320998	0.466866	0.414837	0.293601	0.448908	0.495112	0.540936	0.783972	0.442536	0.415294	0.650925	0.482525	0.533764	0.45945	0.699441	0.475326
cg22260973	0.501367	0.46189	0.367798	0.504064	0.573861	0.545876	0.196839	0.439904	0.58892	0.565584	0.51782	0.595554	0.56094	0.4369	0.56785	0.711952	0.444318	0.639442	0.348001	0.419235	0.415751	0.733989	0.496527	0.543228	0.464011	0.510689	0.52942	0.507094	0.603933	0.510841	0.486781	0.571202	0.504384	0.401159	0.496963	0.5036	0.397012	0.481025	0.516393	0.576408	0.748651	0.512067	0.482529	0.667377	0.413725	0.512337	0.530702	0.689494	0.501576
cg08991794	0.667253	0.748567	0.686584	0.647053	0.671872	0.650135	0.763142	0.720544	0.680154	0.732727	0.700612	0.636784	0.677241	0.714694	0.587953	0.592353	0.620183	0.597264	0.726246	0.743799	0.733346	0.556312	0.670247	0.650926	0.718669	0.733595	0.645779	0.653425	0.684046	0.654608	0.775709	0.599871	0.813198	0.750462	0.745842	0.742191	0.808962	0.733537	0.678462	0.639271	0.435717	0.733117	0.619738	0.539806	0.700354	0.706401	0.649673	0.547508	0.644184
cg09967176	0.333002	0.200387	0.141983	0.292541	0.358145	0.298231	0.114096	0.273559	0.350465	0.29153	0.237505	0.301665	0.284631	0.286943	0.310624	0.27874	0.356807	0.363887	0.245346	0.285997	0.225136	0.334222	0.326357	0.339092	0.302537	0.23135	0.382113	0.322239	0.357833	0.30076	0.302953	0.381572	0.264879	0.248204	0.297629	0.258688	0.226262	0.295645	0.431216	0.343269	0.485332	0.242786	0.283843	0.408091	0.251201	0.311798	0.287935	0.431938	0.348298
cg15054753	0.329817	0.162126	0.136501	0.227455	0.327267	0.330755	0.0747707	0.20774	0.349704	0.324108	0.255334	0.332123	0.352079	0.228366	0.27554	0.234162	0.372548	0.356394	0.215057	0.238382	0.179525	0.424221	0.29522	0.303553	0.222398	0.308096	0.320845	0.306919	0.391973	0.325599	0.287577	0.371213	0.175078	0.183267	0.230155	0.289779	0.155429	0.305713	0.35303	0.368065	0.570276	0.262189	0.253449	0.44393	0.273027	0.283036	0.293361	0.478754	0.36078
cg11423096	0.427647	0.391056	0.448023	0.48537	0.476679	0.518638	0.32394	0.284293	0.416554	0.391569	0.418397	0.483405	0.541379	0.332246	0.561965	0.489542	0.503039	0.549394	0.308529	0.394205	0.319214	0.515105	0.310408	0.40875	0.449179	0.31531	0.345556	0.595769	0.463719	0.451728	0.465356	0.620973	0.394051	0.339932	0.418147	0.363485	0.255564	0.354611	0.321107	0.439325	0.711001	0.328721	0.336917	0.577024	0.419104	0.41942	0.422515	0.612179	0.401
cg23933458	0.475345	0.426078	0.446222	0.497196	0.543352	0.546988	0.169535	0.419179	0.498508	0.485788	0.41483	0.500295	0.563936	0.332103	0.515935	0.821935	0.465695	0.481258	0.241743	0.337929	0.378096	0.629889	0.389143	0.507307	0.472724	0.453374	0.325333	0.861603	0.575252	0.506926	0.401657	0.863986	0.442848	0.348303	0.373142	0.401492	0.307745	0.477169	0.510493	0.465453	0.885672	0.422001	0.391216	0.723287	0.304908	0.401466	0.424223	0.914881	0.411805
cg00376816	0.710884	0.787448	0.807226	0.716842	0.712798	0.692858	0.873669	0.702998	0.70723	0.732545	0.719992	0.653599	0.741118	0.751069	0.720294	0.538801	0.727143	0.602202	0.842862	0.802173	0.76411	0.564231	0.769676	0.705689	0.802864	0.66307	0.680124	0.705658	0.524138	0.634139	0.799406	0.615109	0.714945	0.788289	0.711134	0.700569	0.82284	0.771894	0.728273	0.668748	0.488532	0.691332	0.732345	0.544314	0.769152	0.754685	0.639192	0.565438	0.678987
cg02670718	0.665229	0.701921	0.568213	0.704549	0.67228	0.713661	0.699359	0.685755	0.608248	0.653266	0.648057	0.670702	0.775401	0.676967	0.628694	0.525	0.648813	0.587697	0.781744	0.781877	0.598825	0.49976	0.738011	0.55587	0.748976	0.760872	0.618551	0.666557	0.65966	0.603926	0.652457	0.41889	0.734818	0.72338	0.715094	0.689979	0.785999	0.729326	0.554315	0.67013	0.516552	0.66987	0.632904	0.548475	0.75501	0.666696	0.676051	0.574746	0.686977
cg04070685	0.308793	0.262805	0.239587	0.294551	0.283634	0.392816	0.120863	0.124176	0.417207	0.288183	0.233613	0.348656	0.410769	0.249051	0.334333	0.364773	0.247363	0.461822	0.278492	0.198888	0.176142	0.354545	0.272942	0.343812	0.329874	0.168516	0.369312	0.41176	0.340906	0.299552	0.265562	0.462458	0.142694	0.254904	0.242005	0.215102	0.170816	0.372174	0.346391	0.348603	0.569074	0.281751	0.307235	0.47544	0.302495	0.336422	0.211805	0.572721	0.328485
cg25233914	0.195736	0.15167	0.142177	0.163939	0.205634	0.218115	0.0630112	0.115455	0.20468	0.209405	0.151153	0.22211	0.278252	0.209841	0.286142	0.247269	0.18454	0.24583	0.126849	0.155552	0.111402	0.264549	0.158434	0.300549	0.14743	0.0939024	0.243729	0.234303	0.204189	0.174743	0.0866459	0.281654	0.122381	0.132101	0.0934367	0.107357	0.0789014	0.206859	0.31398	0.269643	0.480718	0.136136	0.186859	0.329656	0.135719	0.148414	0.261898	0.441952	0.246873
cg01474011	0.488472	0.406313	0.380981	0.508614	0.529615	0.515224	0.177227	0.416492	0.541506	0.512394	0.423693	0.529427	0.508245	0.46429	0.533237	0.702284	0.49494	0.635569	0.275127	0.399443	0.386834	0.731963	0.409654	0.544169	0.435134	0.410081	0.519052	0.393041	0.542846	0.495385	0.383464	0.509803	0.492746	0.364028	0.441413	0.447137	0.315027	0.46192	0.460933	0.501463	0.747403	0.4626	0.438521	0.664742	0.385131	0.508479	0.463039	0.683372	0.478192
cg17914584	0.445504	0.415409	0.293357	0.484589	0.468176	0.517044	0.120733	0.408286	0.535136	0.439898	0.43998	0.533574	0.531625	0.400095	0.513788	0.701551	0.496192	0.593733	0.274261	0.304195	0.464711	0.734232	0.410873	0.507654	0.39482	0.398693	0.451026	0.334041	0.534019	0.474227	0.341978	0.481606	0.511704	0.320992	0.421097	0.473573	0.325111	0.433927	0.499997	0.538738	0.708947	0.521952	0.418594	0.617433	0.352749	0.46121	0.464421	0.658115	0.433694
cg17532799	0.185351	0.277586	0.242133	0.209725	0.31109	0.252432	0.0867254	0.166513	0.375473	0.339108	0.25909	0.286747	0.306243	0.152634	0.270693	0.510729	0.240948	0.269418	0.186542	0.128401	0.100787	0.450929	0.162407	0.230244	0.173882	0.223826	0.190422	0.228504	0.364848	0.22146	0.290897	0.522301	0.123948	0.120573	0.144354	0.236338	0.149346	0.223521	0.212754	0.257681	0.487625	0.181	0.140711	0.346828	0.127905	0.271149	0.236064	0.546713	0.211015
cg12621279	0.565534	0.346948	0.341978	0.500594	0.508928	0.500912	0.152457	0.378609	0.546056	0.519999	0.405807	0.468531	0.533898	0.403645	0.537158	0.850622	0.44895	0.676042	0.2558	0.319915	0.40823	0.684597	0.401242	0.531143	0.464579	0.331855	0.520318	0.376498	0.549809	0.523999	0.397476	0.503687	0.44846	0.35623	0.436522	0.397369	0.279826	0.449818	0.475346	0.552836	0.71657	0.483251	0.443845	0.671287	0.364464	0.515212	0.470938	0.652584	0.581888
cg02387618	0.686576	0.869047	0.835867	0.752861	0.781094	0.670071	0.930356	0.790926	0.736758	0.809262	0.802228	0.659826	0.757037	0.756718	0.688366	0.641409	0.706099	0.637608	0.807923	0.842084	0.763399	0.60706	0.634013	0.728859	0.786913	0.814685	0.673929	0.685463	0.737948	0.706819	0.840834	0.607558	0.750082	0.825209	0.786332	0.787464	0.865032	0.811298	0.691074	0.660747	0.430002	0.773946	0.693815	0.552504	0.798111	0.752252	0.709681	0.495162	0.728805
cg04252446	0.42908	0.338622	0.298202	0.390628	0.438691	0.467367	0.15039	0.349557	0.465702	0.424372	0.395592	0.429296	0.43463	0.386672	0.461491	0.494856	0.455763	0.509263	0.283372	0.346957	0.322091	0.552834	0.367401	0.468078	0.425908	0.310958	0.481382	0.396336	0.481702	0.455014	0.411286	0.515163	0.413739	0.334534	0.377015	0.365884	0.301313	0.435356	0.488351	0.45568	0.660138	0.403959	0.379537	0.568219	0.356556	0.414392	0.432326	0.608883	0.448631
cg11578532	0.465928	0.447544	0.487583	0.430197	0.382609	0.428045	0.37103	0.301874	0.349278	0.574632	0.522432	0.531173	0.551963	0.489348	0.607977	0.696028	0.465568	0.491552	0.445114	0.554899	0.492154	0.651533	0.333064	0.549464	0.550048	0.328845	0.492485	0.633218	0.565154	0.508685	0.57088	0.475401	0.491188	0.453867	0.518647	0.287708	0.487774	0.560732	0.617228	0.547176	0.742253	0.513054	0.498134	0.611399	0.617394	0.351534	0.398888	0.610217	0.56978
cg16714853	0.446348	0.388411	0.428797	0.460393	0.455561	0.50491	0.32423	0.347649	0.458002	0.49576	0.413284	0.459732	0.533073	0.330578	0.54198	0.490007	0.411775	0.536179	0.383404	0.453139	0.295544	0.485498	0.333755	0.439764	0.402574	0.444815	0.392445	0.685679	0.491464	0.404841	0.386814	0.672629	0.338043	0.342096	0.313282	0.346231	0.295506	0.440115	0.469368	0.45886	0.758998	0.394285	0.415337	0.644896	0.436516	0.366249	0.499224	0.696015	0.530124
cg20837066	0.653471	0.693351	0.764578	0.614267	0.579465	0.588437	0.823447	0.679157	0.682165	0.631535	0.712239	0.657823	0.683423	0.692484	0.616168	0.379516	0.730925	0.566429	0.813136	0.679706	0.761926	0.443014	0.703393	0.601967	0.690615	0.794924	0.653279	0.683293	0.508202	0.603727	0.703547	0.665125	0.686554	0.706042	0.725425	0.698183	0.723109	0.65862	0.685346	0.575502	0.438787	0.587337	0.569527	0.504804	0.697104	0.617718	0.64091	0.496584	0.654274
cg06164037	0.465831	0.392609	0.322776	0.462726	0.481533	0.497254	0.181418	0.42157	0.532561	0.49351	0.44303	0.508085	0.507525	0.429393	0.504477	0.665891	0.477573	0.549268	0.339444	0.367455	0.433651	0.630005	0.468066	0.498386	0.449874	0.448877	0.502233	0.4131	0.546778	0.510122	0.436149	0.523286	0.519851	0.386502	0.472585	0.484539	0.359604	0.438455	0.495792	0.479927	0.696187	0.471343	0.40259	0.613779	0.421123	0.455932	0.443207	0.59338	0.488422
cg06320917	0.148235	0.102822	0.148586	0.135473	0.15322	0.159607	0.0730489	0.0501083	0.134849	0.169983	0.141635	0.133885	0.230666	0.101365	0.174399	0.142479	0.111207	0.148757	0.109315	0.125803	0.0846917	0.129276	0.0722641	0.121335	0.171385	0.143387	0.119341	0.258273	0.200814	0.16122	0.142429	0.307187	0.0714071	0.102166	0.100467	0.0913869	0.0906283	0.13827	0.149348	0.166964	0.34577	0.0868292	0.108448	0.240606	0.132839	0.117807	0.144135	0.3782	0.130569
cg19547773	0.528487	0.518172	0.406171	0.608379	0.600473	0.618707	0.210895	0.509556	0.641553	0.591734	0.542639	0.628949	0.580202	0.511702	0.575731	0.738973	0.626828	0.635785	0.329779	0.468422	0.505394	0.790739	0.441554	0.605952	0.489097	0.512088	0.57749	0.476421	0.645963	0.569346	0.448275	0.59888	0.596306	0.45375	0.540384	0.583588	0.409164	0.517614	0.517917	0.561547	0.804239	0.597796	0.528911	0.729905	0.488082	0.541553	0.521278	0.738967	0.582738
cg04903089	0.369817	0.326122	0.240983	0.405325	0.391432	0.429477	0.150966	0.324779	0.429393	0.422753	0.352212	0.414569	0.399416	0.346835	0.376544	0.54359	0.447328	0.490593	0.268153	0.29536	0.331834	0.51935	0.371729	0.445311	0.386823	0.286668	0.439285	0.304819	0.408572	0.439325	0.335131	0.371584	0.430151	0.284878	0.367239	0.369044	0.265799	0.344042	0.36654	0.421725	0.571431	0.377722	0.344577	0.49856	0.309912	0.420075	0.368804	0.507044	0.417191
cg03533141	0.415709	0.324822	0.339645	0.398068	0.395689	0.398429	0.287146	0.326502	0.419793	0.407937	0.377066	0.422737	0.419034	0.367676	0.397917	0.408997	0.388772	0.443657	0.402651	0.337163	0.319837	0.402215	0.385092	0.407638	0.425319	0.369952	0.424501	0.405697	0.436547	0.393786	0.373006	0.482529	0.344332	0.380933	0.372675	0.401375	0.344965	0.410991	0.391865	0.395243	0.566359	0.348714	0.355924	0.496166	0.386787	0.375968	0.386184	0.538484	0.394905
cg13213011	0.476345	0.408816	0.319932	0.48162	0.473459	0.514706	0.167185	0.397691	0.531849	0.542783	0.430159	0.517272	0.543317	0.427632	0.496887	0.607743	0.494672	0.619567	0.346789	0.399826	0.396455	0.717542	0.453024	0.525582	0.524586	0.294539	0.527479	0.402248	0.559918	0.491396	0.401299	0.543052	0.492963	0.327917	0.432253	0.449855	0.323347	0.513066	0.532788	0.527226	0.73296	0.451675	0.47962	0.622217	0.37183	0.492652	0.460779	0.686643	0.505978
cg17737314	0.386944	0.335659	0.289676	0.426445	0.392801	0.428812	0.143121	0.240608	0.427816	0.424401	0.34632	0.461564	0.457596	0.302721	0.478201	0.554751	0.32224	0.558652	0.300619	0.354975	0.204794	0.604629	0.265373	0.462824	0.356537	0.270687	0.462691	0.35346	0.498839	0.37011	0.334686	0.473283	0.294629	0.259782	0.295285	0.326497	0.205951	0.403061	0.409251	0.452551	0.696115	0.317911	0.345625	0.566151	0.300083	0.359736	0.4224	0.634351	0.471887
cg06276064	0.68864	0.750359	0.705505	0.66961	0.706573	0.671799	0.819259	0.697181	0.681828	0.746769	0.754668	0.693692	0.621734	0.782229	0.659714	0.50847	0.754823	0.698209	0.743518	0.796136	0.780968	0.595995	0.776738	0.714098	0.781783	0.718205	0.793661	0.385748	0.575174	0.708667	0.693521	0.406796	0.782986	0.75755	0.735812	0.764959	0.796882	0.731209	0.706825	0.614912	0.400466	0.700088	0.650492	0.545517	0.763401	0.695332	0.713819	0.355883	0.717633
cg11379095	0.333287	0.315397	0.203137	0.336378	0.394983	0.380366	0.098075	0.262313	0.413199	0.387968	0.343036	0.441752	0.421057	0.308652	0.469344	0.392928	0.421792	0.47441	0.205542	0.292389	0.287505	0.507435	0.337309	0.3911	0.299753	0.317188	0.379743	0.310467	0.42622	0.363973	0.327052	0.413403	0.333885	0.270842	0.29371	0.326681	0.198795	0.340599	0.378958	0.382921	0.635972	0.343131	0.303333	0.513514	0.338359	0.350225	0.38112	0.576264	0.420182
cg01634146	0.965037	0.954817	0.962084	0.958151	0.945216	0.955737	0.983555	0.97193	0.953127	0.92835	0.969539	0.957564	0.896312	0.98519	0.976973	0.836553	0.967702	0.967341	0.982062	0.97486	0.986765	0.854656	0.968598	0.984912	0.976472	0.962983	0.975749	0.554023	0.879459	0.957146	0.952561	0.393858	0.967973	0.98139	0.971558	0.975091	0.978557	0.950184	0.956811	0.975035	0.372133	0.94957	0.965629	0.816209	0.974269	0.952003	0.956863	0.415357	0.962179
cg18845588	0.552724	0.564381	0.615669	0.565599	0.587628	0.583326	0.612843	0.572529	0.609017	0.562479	0.565334	0.647073	0.644441	0.561935	0.589609	0.59128	0.536815	0.590776	0.560426	0.540742	0.463581	0.565825	0.631489	0.605835	0.556347	0.535815	0.608132	0.667449	0.591372	0.511055	0.545597	0.719808	0.418599	0.540675	0.536678	0.519804	0.490407	0.582888	0.603832	0.575174	0.765664	0.545488	0.504698	0.708997	0.574931	0.552148	0.599388	0.791049	0.570477
cg27659862	0.668704	0.791374	0.839716	0.687545	0.684661	0.69296	0.878743	0.703559	0.690287	0.704307	0.759975	0.69124	0.662123	0.732886	0.687667	0.453893	0.673826	0.693702	0.866762	0.788531	0.81247	0.531951	0.691441	0.68405	0.791268	0.744433	0.623429	0.700283	0.648823	0.73307	0.798257	0.705811	0.711455	0.751392	0.75802	0.781525	0.824429	0.740439	0.679982	0.671867	0.484429	0.687643	0.679413	0.517264	0.800091	0.725618	0.708853	0.476108	0.654823
cg21574271	0.328719	0.363495	0.361781	0.329503	0.422362	0.444806	0.168104	0.260821	0.42458	0.380732	0.342015	0.421776	0.38198	0.299965	0.398852	0.520279	0.34681	0.440677	0.267301	0.252591	0.274407	0.480326	0.267076	0.325118	0.345676	0.339313	0.315176	0.549976	0.422561	0.409494	0.319647	0.707709	0.355863	0.270974	0.30659	0.35738	0.244792	0.353675	0.399035	0.375002	0.743019	0.37683	0.33381	0.520688	0.23772	0.357903	0.342119	0.723994	0.440419
cg05938888	0.289903	0.181749	0.169856	0.258578	0.302475	0.361765	0.0893465	0.135359	0.323995	0.237755	0.245001	0.400928	0.378626	0.21403	0.322131	0.306744	0.377344	0.345381	0.205984	0.187266	0.105695	0.446038	0.223084	0.337609	0.190687	0.152185	0.286742	0.25524	0.328844	0.266946	0.253858	0.291217	0.150093	0.164795	0.145059	0.141819	0.156771	0.227649	0.310151	0.324978	0.526312	0.187456	0.258176	0.430034	0.174674	0.235676	0.251126	0.507037	0.339211
cg02586450	0.534412	0.591587	0.603755	0.520224	0.558109	0.541384	0.70097	0.648043	0.497626	0.451737	0.557081	0.478715	0.386952	0.634785	0.475855	0.303865	0.611365	0.440024	0.696158	0.599361	0.557341	0.227644	0.574132	0.559269	0.582895	0.567216	0.543166	0.507935	0.334982	0.515006	0.521014	0.427478	0.586612	0.642549	0.626962	0.623038	0.723997	0.521336	0.477689	0.408399	0.193638	0.563484	0.529713	0.295595	0.595684	0.466516	0.584624	0.244953	0.534868
cg24627299	0.520013	0.633411	0.497966	0.554106	0.650191	0.693587	0.348688	0.520148	0.73405	0.678042	0.665136	0.611453	0.618964	0.526995	0.636507	0.864529	0.665838	0.58983	0.456388	0.558854	0.394896	0.698101	0.590709	0.615463	0.646789	0.480429	0.572947	0.734984	0.703215	0.627075	0.606396	0.829584	0.596746	0.48245	0.566936	0.506928	0.561803	0.594702	0.691852	0.696331	0.835784	0.4607	0.544363	0.735775	0.553826	0.611424	0.658923	0.820894	0.625567
cg05963131	0.259748	0.172809	0.147491	0.251346	0.247602	0.290488	0.059275	0.202284	0.293999	0.236	0.235569	0.25962	0.247014	0.249204	0.31239	0.333991	0.316136	0.40964	0.118424	0.216526	0.191047	0.371883	0.184111	0.304757	0.213405	0.120476	0.310115	0.218452	0.285367	0.280362	0.176167	0.282572	0.233578	0.176496	0.215597	0.225182	0.109789	0.182039	0.275567	0.257273	0.398014	0.296252	0.221544	0.360959	0.168796	0.245894	0.237997	0.376639	0.304415
cg08801415	0.529942	0.512604	0.418282	0.5577	0.560268	0.608595	0.280118	0.492947	0.623918	0.587733	0.509541	0.554331	0.565255	0.511331	0.505794	0.724829	0.591798	0.686796	0.397768	0.518635	0.487744	0.793936	0.461652	0.604962	0.527551	0.497836	0.541764	0.517215	0.653315	0.589519	0.469368	0.586804	0.568162	0.439274	0.499957	0.51622	0.379526	0.553863	0.575131	0.558768	0.820828	0.524911	0.514571	0.714311	0.431016	0.562162	0.565253	0.73537	0.59374
cg14880874	0.294568	0.152313	0.159807	0.242662	0.300383	0.306746	0.0275402	0.16052	0.334881	0.242093	0.216	0.356961	0.368315	0.209707	0.391287	0.315005	0.302144	0.378234	0.149658	0.213371	0.125135	0.405295	0.205088	0.254875	0.260243	0.238657	0.30677	0.288592	0.389681	0.250663	0.233772	0.394766	0.127678	0.187439	0.182168	0.155097	0.0882528	0.239775	0.360247	0.352824	0.687951	0.153597	0.192728	0.45387	0.217536	0.176587	0.279501	0.569074	0.321973
cg12394112	0.208154	0.12001	0.115749	0.16488	0.179763	0.214977	0.0575439	0.09166	0.228744	0.178067	0.170019	0.207977	0.285078	0.164297	0.214881	0.262997	0.160033	0.248667	0.113527	0.152188	0.0883392	0.287075	0.105988	0.184045	0.13467	0.120104	0.230546	0.164775	0.257942	0.191786	0.144442	0.280698	0.0908147	0.104424	0.128872	0.104096	0.0986024	0.212186	0.219446	0.248088	0.493223	0.0974032	0.161876	0.307163	0.192914	0.173924	0.14277	0.365988	0.27963
cg11454957	0.664675	0.628803	0.66415	0.624176	0.638174	0.719978	0.58466	0.607485	0.72056	0.686769	0.673739	0.691234	0.752978	0.556852	0.755313	0.628269	0.68666	0.662869	0.637879	0.680113	0.563916	0.666809	0.561495	0.598566	0.692575	0.78704	0.592122	0.800931	0.746669	0.685368	0.707127	0.819248	0.491589	0.601395	0.651014	0.58434	0.601973	0.679826	0.715902	0.698196	0.809194	0.525954	0.579168	0.774361	0.672343	0.614544	0.701543	0.858246	0.656044
cg05209461	0.369117	0.270629	0.227228	0.381492	0.399129	0.387752	0.102566	0.298478	0.403607	0.367651	0.338736	0.365789	0.388107	0.305912	0.374742	0.430799	0.352804	0.495573	0.259244	0.308084	0.276876	0.584897	0.225806	0.408691	0.326916	0.263884	0.392675	0.317201	0.444035	0.361319	0.289614	0.422866	0.303737	0.310378	0.313616	0.3171	0.171868	0.309471	0.353832	0.405154	0.638549	0.376209	0.304355	0.51419	0.270318	0.340212	0.390363	0.535396	0.38891
cg21694873	0.462083	0.440676	0.288545	0.510715	0.532807	0.526149	0.151986	0.384464	0.564562	0.508905	0.443603	0.545126	0.495762	0.456172	0.563673	0.728735	0.525829	0.600476	0.245506	0.44343	0.4184	0.684581	0.466243	0.530953	0.389326	0.518275	0.520503	0.332367	0.566495	0.505947	0.401511	0.491593	0.516674	0.365175	0.404404	0.477817	0.32495	0.455356	0.549336	0.474265	0.76264	0.538091	0.515588	0.654498	0.416008	0.568328	0.41988	0.6325	0.486
cg15908977	0.432311	0.313254	0.238566	0.424108	0.449381	0.465631	0.0979001	0.299567	0.457531	0.485616	0.368194	0.417805	0.474674	0.322458	0.459713	0.48209	0.541845	0.533312	0.309239	0.300199	0.263605	0.577013	0.296381	0.472537	0.318895	0.257901	0.438984	0.372295	0.530508	0.403942	0.339844	0.493937	0.225849	0.296956	0.321202	0.376345	0.195564	0.409725	0.438206	0.467609	0.774198	0.274657	0.370563	0.61038	0.350059	0.315483	0.41179	0.646477	0.421545
cg20939696	0.381216	0.473388	0.415957	0.418597	0.396058	0.419706	0.251041	0.276612	0.465425	0.513213	0.406737	0.475505	0.523782	0.352698	0.493481	0.587651	0.455815	0.37573	0.379319	0.429381	0.306162	0.460822	0.323266	0.344414	0.531428	0.320858	0.38797	0.523752	0.505498	0.513888	0.476513	0.632645	0.388456	0.293154	0.346483	0.303313	0.417474	0.473394	0.482815	0.46886	0.575419	0.399639	0.384122	0.529448	0.404935	0.453719	0.405077	0.601981	0.455344
cg12684668	0.631551	0.594028	0.485893	0.565602	0.71332	0.630391	0.333411	0.5745	0.685518	0.686135	0.622684	0.618073	0.660438	0.561996	0.637164	0.802652	0.607457	0.680653	0.428805	0.569916	0.529013	0.796183	0.574374	0.660041	0.608323	0.641277	0.614519	0.647193	0.718817	0.669089	0.64177	0.763264	0.676035	0.531518	0.542091	0.596334	0.504032	0.65215	0.760643	0.636246	0.82031	0.631477	0.619439	0.774633	0.529081	0.681874	0.611517	0.768523	0.651241
cg01292394	0.303679	0.255979	0.18454	0.345383	0.364609	0.287157	0.122897	0.247979	0.369672	0.371087	0.277514	0.327698	0.306658	0.294552	0.337506	0.653888	0.39677	0.38214	0.216954	0.177285	0.242442	0.436	0.340453	0.387779	0.326637	0.118739	0.381701	0.341098	0.377504	0.265074	0.338697	0.488966	0.237272	0.247955	0.252573	0.311245	0.193884	0.3163	0.306948	0.361145	0.533976	0.323016	0.252514	0.447539	0.217551	0.298054	0.287554	0.522409	0.326565
cg26862894	0.38771	0.352825	0.294513	0.483313	0.417445	0.50551	0.106761	0.287906	0.437439	0.373608	0.39322	0.492165	0.407951	0.357164	0.444087	0.497358	0.49348	0.503167	0.220012	0.363395	0.375252	0.571233	0.258203	0.473348	0.373479	0.2626	0.476678	0.379753	0.453144	0.418789	0.274743	0.494658	0.39013	0.365101	0.305244	0.40091	0.228494	0.31628	0.4003	0.458363	0.706838	0.388957	0.348531	0.563193	0.299769	0.454349	0.382936	0.61867	0.458214
cg19502821	0.375771	0.313808	0.297336	0.314727	0.410151	0.377406	0.191448	0.280997	0.422745	0.401475	0.310394	0.409462	0.348144	0.388551	0.347247	0.36447	0.377579	0.432218	0.302592	0.349044	0.276996	0.402726	0.355212	0.366676	0.385731	0.322401	0.451836	0.346858	0.370744	0.372806	0.393838	0.458973	0.347914	0.317138	0.362135	0.348837	0.293327	0.366823	0.453733	0.354104	0.558464	0.356058	0.387515	0.461029	0.282116	0.394962	0.38391	0.547935	0.390966
cg18238078	0.605144	0.691216	0.571595	0.671459	0.716024	0.690282	0.428594	0.513739	0.70619	0.769423	0.748526	0.770954	0.745126	0.596781	0.756743	0.844351	0.612433	0.7115	0.657608	0.570264	0.477435	0.719552	0.549756	0.571269	0.739513	0.826749	0.622569	0.856191	0.714962	0.689184	0.709272	0.822185	0.570121	0.505675	0.627817	0.556268	0.602253	0.667367	0.700513	0.665277	0.847642	0.601015	0.676	0.803084	0.647358	0.625547	0.696523	0.856985	0.65066
cg13402430	0.424442	0.324652	0.279546	0.419361	0.42915	0.514259	0.116901	0.340971	0.541203	0.418292	0.381406	0.449924	0.456467	0.353726	0.505234	0.530112	0.485776	0.595938	0.246307	0.320861	0.306477	0.661278	0.166365	0.437657	0.424089	0.324788	0.445047	0.311752	0.513942	0.435315	0.357073	0.424164	0.398649	0.283674	0.408344	0.408729	0.260277	0.394614	0.524203	0.508292	0.737906	0.32311	0.295419	0.631243	0.337361	0.452886	0.426495	0.654804	0.46606
cg25680952	0.740103	0.676932	0.776825	0.703634	0.679513	0.590581	0.81401	0.778085	0.633033	0.701036	0.747846	0.635916	0.594559	0.744789	0.747149	0.369647	0.660101	0.624421	0.798585	0.766307	0.764115	0.414637	0.55824	0.657683	0.716001	0.748382	0.644348	0.682424	0.67508	0.662895	0.655176	0.622012	0.759134	0.834865	0.790112	0.743146	0.770051	0.673447	0.656606	0.674337	0.43541	0.649758	0.65659	0.515068	0.674261	0.551816	0.703663	0.545857	0.6948
cg23181133	0.559232	0.487018	0.452195	0.523644	0.58578	0.569582	0.228206	0.453609	0.63797	0.605159	0.534549	0.552665	0.595698	0.483087	0.581344	0.635372	0.524232	0.671074	0.450039	0.494899	0.417059	0.700806	0.537883	0.526781	0.527842	0.550137	0.624125	0.507653	0.681903	0.565955	0.501186	0.611747	0.466093	0.47179	0.519077	0.467013	0.367806	0.521061	0.553403	0.606556	0.781572	0.47854	0.525622	0.724554	0.472128	0.582876	0.548942	0.71113	0.560527
cg26167603	0.329376	0.290924	0.209422	0.364733	0.347094	0.396336	0.0950664	0.273635	0.362573	0.380299	0.332277	0.36562	0.33118	0.312892	0.383139	0.550588	0.331698	0.41181	0.204923	0.25444	0.30652	0.463868	0.324407	0.380053	0.321553	0.29922	0.359398	0.294756	0.347983	0.412451	0.296451	0.396595	0.355886	0.250237	0.305964	0.334077	0.233444	0.313912	0.360678	0.371489	0.544144	0.387622	0.328376	0.472556	0.277312	0.379042	0.331584	0.496024	0.302544
cg14947642	0.299931	0.303384	0.212979	0.295649	0.363351	0.343376	0.0851625	0.306214	0.355853	0.422188	0.335102	0.317404	0.355976	0.284231	0.332283	0.574019	0.375093	0.38738	0.17607	0.261962	0.274587	0.520764	0.297101	0.30598	0.337467	0.323017	0.43196	0.266115	0.396039	0.352266	0.291449	0.446247	0.316662	0.215518	0.259418	0.32131	0.210734	0.358896	0.39203	0.391056	0.551687	0.321272	0.304874	0.470456	0.235666	0.349827	0.323985	0.546858	0.378055
cg12081645	0.352076	0.326115	0.211227	0.387313	0.408367	0.487615	0.143357	0.301899	0.405328	0.417088	0.337188	0.407163	0.398971	0.288803	0.412307	0.670563	0.407246	0.435996	0.209711	0.273092	0.305065	0.59245	0.275707	0.348926	0.393441	0.261158	0.33672	0.434444	0.443045	0.440474	0.324203	0.592243	0.377336	0.248735	0.293352	0.28935	0.243609	0.349711	0.398741	0.431556	0.725843	0.33519	0.309033	0.514924	0.248166	0.426862	0.378969	0.679953	0.35965
cg14685461	0.534864	0.509373	0.422239	0.592131	0.580071	0.569998	0.177868	0.468915	0.626258	0.618304	0.534124	0.554457	0.56534	0.493047	0.569066	0.770568	0.591358	0.640064	0.403204	0.427326	0.486309	0.78499	0.466313	0.608729	0.519599	0.503276	0.581929	0.45308	0.631472	0.570431	0.448791	0.616857	0.60951	0.411498	0.517628	0.596416	0.415431	0.532261	0.536094	0.590428	0.775088	0.609583	0.534884	0.769522	0.44148	0.554058	0.525879	0.755929	0.548361
cg07396047	0.783482	0.799794	0.810518	0.78063	0.749299	0.761672	0.855952	0.813194	0.70591	0.722646	0.77599	0.665314	0.573468	0.80878	0.709084	0.706037	0.743078	0.747622	0.800678	0.80376	0.873951	0.621993	0.764752	0.805774	0.828097	0.664771	0.725884	0.782898	0.649909	0.728235	0.747861	0.620611	0.835144	0.881884	0.757753	0.789317	0.827635	0.695058	0.77979	0.653349	0.476388	0.840616	0.796627	0.616653	0.725148	0.733898	0.752151	0.558933	0.709251
cg08285943	0.350606	0.22997	0.192913	0.363711	0.29811	0.351506	0.098038	0.268461	0.36019	0.379407	0.273313	0.358223	0.391595	0.277865	0.328244	0.465446	0.375294	0.411653	0.199479	0.213155	0.279207	0.47386	0.304687	0.351628	0.315343	0.228199	0.371834	0.257523	0.379839	0.36496	0.248567	0.351898	0.318625	0.204254	0.263356	0.34398	0.238672	0.329403	0.321269	0.373526	0.525518	0.399429	0.306245	0.457053	0.23966	0.341427	0.286319	0.49	0.343723
cg03137672	0.67539	0.817739	0.800737	0.71314	0.705235	0.67044	0.864965	0.724349	0.718987	0.762127	0.760805	0.751061	0.745067	0.739848	0.731491	0.704658	0.721294	0.627542	0.822024	0.802863	0.778498	0.564874	0.679904	0.691692	0.753449	0.841695	0.703955	0.787769	0.672817	0.704909	0.814232	0.637401	0.741456	0.805479	0.745242	0.784308	0.846127	0.779439	0.719342	0.653547	0.495701	0.730186	0.681371	0.564864	0.799851	0.686077	0.71799	0.6281	0.711235
cg12983204	0.46133	0.383834	0.29136	0.468383	0.492078	0.512913	0.151033	0.386724	0.54597	0.499989	0.416558	0.49883	0.525628	0.408603	0.490592	0.652488	0.498687	0.532977	0.257984	0.355558	0.409011	0.713657	0.382348	0.492632	0.406681	0.359527	0.473617	0.387713	0.526856	0.504559	0.389617	0.471513	0.494463	0.364368	0.405454	0.457064	0.297674	0.431173	0.466978	0.496349	0.707435	0.47263	0.408438	0.608985	0.353462	0.499138	0.460025	0.634264	0.498619
[truncated: 11,955 more rows]
[truncated: 57 more columns]

## Sheet: S7
Table S7. DVPs analysis
probeID	C1	C2	C3	C4	C5	C6	C7	C8	C9	C10	C11	C12	C13	C14	C17	C18	C19	C20	C21	C22	C23	C24	C25	C26	C27	C28	C29	C31	C32	C33	C34	C35	C36	C37	C38	C39	C40	P1	P2	P3	P4	P5	P6	P7	P8	P9	P10	P11	P12
[truncated: 11,196 more rows]
[truncated: 53 more columns]

## Sheet: S8
Table S8. DVPs cancer related genes
gene	feature	dvp_count	Anno	total_probes	norm_density
B4GALT5	Body	10	GeneBody	26	0.384615
SLC12A9	Body	7	GeneBody	20	0.35
SNED1	Body	12	GeneBody	71	0.169014
[truncated: 35 more rows]

[truncated: 3 more sheets: S9, S10, S11]
